# Supplementary material for: Selective Inhibition of Oncogenic KRAS Output with Small Molecules Targeting the Inactive State
Source: Oxford University Press journal article supplement (doi:10.1158/2159-8290.cd-15-1105), 2016-01-06
Supplement: 21598290cd151105-sup-155462_2_supp_3294592_q0fwqr.xlsx [file 21598290cd151105-sup-155462_2_supp_3294592_q0fwqr.xlsx]

## Sheet: Summary
Protein ID	Description	Sequence	Variable modifications ([position] description)	Log2-Fold change (3uM853/DMSO)	Log2-Fold change (10uM853/DMSO)	log-2Fold change (30uM853/DMSO)	m/z	Retention time (min)	Mass	Charge	Mass error (ppm)	DMSO_rep1	DMSO_rep2	DMSO_rep3	DMSO_rep4	DMSO_rep5	DMSO_rep6	Average	Standard deviation	%RSD	853_3uM_rep1	853_3uM_rep2	853_3uM_rep3	Average	Standard deviation	%RSD	853_10uM_rep1	853_10uM_rep2	853_10uM_rep3	Average	Standard deviation	%RSD	853_30uM_rep1	853_30uM_rep2	853_30uM_rep3	Average	Standard deviation	%RSD
G12C_naturalvariant_sp	P01116-2 RASK_HUMAN Isoform 2B of GTPase KRas OS=Homo sapiens GN=KRAS	LVVVGACGVGK	[7] DesthioBiotinIAM(new)	-1.22627	-2.1498	-5.20789	649.389	53.9924	1296.76	2	3.82162	246149	223438	218211	238253	238578	240874	234250	10902.7	4.65427	76594.1	111832	111945	100124	20377.3	20.3521	50372.4	52346.8	55641.7	52787	2662.1	5.0431	4116.19	4856.93	10040.7	6337.96	3228.03	50.9317
Q9BRX8	Redox-regulatory protein FAM213A OS=Homo sapiens GN=FAM213A PE=1 SV=3 - [F213A_HUMAN]	RPGCFLCR	[4] DesthioBiotinIAM(new)|[7] Carbamidomethyl	-0.774841	-2.02751	-3.97741	435.564	47.7275	1303.67	3	4.77402	902358	915486	963486	972848	950061	948136	942062	27532.8	2.92261	478337	567672	605765	550591	65408.7	11.8797	217053	228356	247793	231067	15548.4	6.72893	55470.5	61634.3	62318.9	59807.9	3771.84	6.30659
Q9NQC3	Reticulon-4 OS=Homo sapiens GN=RTN4 PE=1 SV=2 - [RTN4_HUMAN]	YSNSALGHVNCTIK	[11] DesthioBiotinIAM(new)	-0.763227	-1.35042	-2.83316	901.968	47.0754	1801.92	2	4.0284	992569	1.07108e+06	1.1524e+06	1.43413e+06	1.57919e+06	1.61407e+06	1.16254e+06	192456	16.5547	643597	674691	736544	684944	47314.1	6.90773	182122	431314	754334	455923	286899	62.927	128654	164680	196066	163133	33732.3	20.6777
Q8N1G4	Leucine-rich repeat-containing protein 47 OS=Homo sapiens GN=LRRC47 PE=1 SV=1 - [LRC47_HUMAN]	LHEDLCEKR	[6] DesthioBiotinIAM(new)	-0.143331	-0.176815	-2.0747	480.254	38.4384	1437.74	3	0.687124	4958.27	5741.87	6478.07	7626.7	7807.38	7997	6768.21	1244.2	18.3831	3493.77	5776.45	9114.13	6128.12	2826.63	46.1257	3285.5	6890.72	7786.36	5987.53	2382.49	39.7909	1160.21	1577.33	2082.47	1606.67	461.83	28.7446
P30519	Heme oxygenase 2 OS=Homo sapiens GN=HMOX2 PE=1 SV=2 - [HMOX2_HUMAN]	KCPFYAAEQDKGALEGSSCPFR	[2] Carbamidomethyl|[19] DesthioBiotinIAM(new)	-0.511295	-0.505384	-2.02809	919.781	52.8718	2756.32	3	5.60049	343158	367368	376224	404395	434510	456432	397015	42901	10.8059	212256	239732	383639	278542	92047.4	33.0461	170667	294943	373448	279686	102248	36.5581	81779.5	102165	108075	97339.7	13795.7	14.1727
Q9Y2K7	Lysine-specific demethylase 2A OS=Homo sapiens GN=KDM2A PE=1 SV=3 - [KDM2A_HUMAN]	VLVQHCPAR	[6] DesthioBiotinIAM(new)	0.586205	-0.780158	-1.70866	440.253	39.3205	1317.74	3	2.44818	15171.8	16978.5	26593	26722.4	28529.5	32507.6	24417.1	6829.73	27.9711	21635.1	33758.6	54578.1	36657.3	16661.7	45.4525	9191.12	10879.6	22583.8	14218.2	7293.83	51.2994	3948.39	8015.41	10447	7470.27	3283.43	43.9533
O14545	TRAF-type zinc finger domain-containing protein 1 OS=Homo sapiens GN=TRAFD1 PE=1 SV=1 - [TRAD1_HUMAN]	KHEETECPLR	[7] DesthioBiotinIAM(new)	-0.33152	-0.718684	-1.69333	513.265	37.3558	1536.77	3	0.763832	6267.64	7850.28	7853.38	8242.05	9227.37	14772.8	9035.58	2968.02	32.8482	4112.21	5722.09	11707.4	7180.56	4002.13	55.7356	5022.43	5682.73	5766.3	5490.49	407.5	7.42193	2511.47	2538.96	3331.29	2793.91	465.592	16.6645
Q14103	Heterogeneous nuclear ribonucleoprotein D0 OS=Homo sapiens GN=HNRNPD PE=1 SV=1 - [HNRPD_HUMAN]	FGEVVDCTLK	[7] DesthioBiotinIAM(new)	-0.311902	-0.585981	-1.58491	703.873	56.24	1405.73	2	3.1323	226233	256153	260179	320793	343676	343934	291828	50634.4	17.3508	197222	241866	266184	235091	34976.6	14.8779	135547	187727	259970	194415	62480.7	32.1379	59692.3	97757.6	134389	97279.5	37350.5	38.3951
Q9BXP5	Serrate RNA effector molecule homolog OS=Homo sapiens GN=SRRT PE=1 SV=1 - [SRRT_HUMAN]	DKWLCPLSGKK	[5] DesthioBiotinIAM(new)	0.288253	0.546129	-1.58006	524.298	50.1101	1569.87	3	0.505537	12433.6	14318.9	27763	28247.9	44168.9	47818.9	29125.2	14671.3	50.3731	7384.54	23768.1	75547.1	35566.6	35580	100.038	16612.9	25686	85283.7	42527.5	37304.8	87.7192	8355.82	10406.5	10462.1	9741.48	1200.34	12.322
P49458	Signal recognition particle 9 kDa protein OS=Homo sapiens GN=SRP9 PE=1 SV=2 - [SRP09_HUMAN]	HSDGNLCVK	[7] DesthioBiotinIAM(new)	-0.745261	0.205175	-1.34401	634.825	40.3325	1267.64	2	1.12792	94529.4	139838	169268	378356	488020	509857	296645	184621	62.2363	59185.6	140908	330806	176966	139354	78.746	101353	337954	586633	341980	242665	70.9589	78769.8	79824.9	191971	116855	65054.2	55.6708
Q8NBS9	Thioredoxin domain-containing protein 5 OS=Homo sapiens GN=TXNDC5 PE=1 SV=2 - [TXND5_HUMAN]	FFAPWCGHCK	[6] DesthioBiotinIAM(new)|[9] Carbamidomethyl	0.208785	-0.428306	-1.33828	774.868	56.2606	1547.72	2	3.65212	72043.1	77622.2	77939.9	117913	144110	163159	108798	38885.1	35.7406	79286.3	101383	196549	125739	62310.1	49.555	78569.4	81687.1	82297.6	80851.4	1999.69	2.47329	30856.7	43832.9	54396	43028.5	11790.3	27.4011
Q9ULW0	Targeting protein for Xklp2 OS=Homo sapiens GN=TPX2 PE=1 SV=2 - [TPX2_HUMAN]	KKTEDEHFEFHSRPCPTK	[15] DesthioBiotinIAM(new)	-0.0435162	-0.156318	-1.29772	503.256	37.426	2511.24	5	3.94283	163050	164122	172355	189340	195766	212446	182846	19686.6	10.7667	153656	169412	209172	177413	28609.9	16.1261	146729	162937	182544	164070	17934.5	10.931	35609.1	39226.6	148292	74376	64039	86.1017
P24752	Acetyl-CoA acetyltransferase, mitochondrial OS=Homo sapiens GN=ACAT1 PE=1 SV=1 - [THIL_HUMAN]	VCASGMK	[2] DesthioBiotinIAM(new)	-0.712935	0.347649	-1.24158	496.259	40.3439	990.503	2	3.71567	103712	160463	162801	187739	344158	667022	270983	210252	77.5886	93769.8	139312	262879	165320	87503.3	52.9295	129767	423396	481300	344821	188479	54.66	87104.5	125761	130936	114601	23952.5	20.9008
P34932	Heat shock 70 kDa protein 4 OS=Homo sapiens GN=HSPA4 PE=1 SV=4 - [HSP74_HUMAN]	IKELTSTCSPIISKPKPK	[8] DesthioBiotinIAM(new)	-0.220868	-0.773383	-1.21025	454.071	42.8943	2265.32	5	1.39819	262806	266555	269747	279689	297025	298487	279052	15542.6	5.56981	212045	249984	256291	239440	23933.9	9.99578	132780	174143	182850	163257	26751.2	16.3859	110236	125542	126036	120605	8982.8	7.44814
O60437	Periplakin OS=Homo sapiens GN=PPL PE=1 SV=4 - [PEPL_HUMAN]	QCSSTLASR	[2] DesthioBiotinIAM(new)	-0.615779	-0.467362	-1.12968	624.824	41.2707	1247.63	2	2.67881	50261.5	76128.4	96725.3	200197	205163	235810	144048	78684.7	54.6241	18740.9	117914	145351	94002.2	66606.3	70.8561	30352.7	140827	141383	104188	63943.5	61.3734	21086	81115.4	95295.9	65832.4	39394.9	59.8411
O43592	Exportin-T OS=Homo sapiens GN=XPOT PE=1 SV=2 - [XPOT_HUMAN]	FFTVEPQHIPCVLMAFLDHR	[11] DesthioBiotinIAM(new)|[14] Oxidation	-0.28591	-0.596414	-1.11442	678.854	72.7926	2711.39	4	5.6397	1.90034e+06	2.49691e+06	3.09635e+06	3.13152e+06	3.20943e+06	3.23712e+06	2.84528e+06	537659	18.8965	1.629e+06	2.0068e+06	3.3655e+06	2.33377e+06	913256	39.1323	1.26575e+06	1.63987e+06	2.73995e+06	1.88186e+06	766311	40.721	951661	1.14623e+06	1.8446e+06	1.31416e+06	469562	35.7309
P68363	Tubulin alpha-1B chain OS=Homo sapiens GN=TUBA1B PE=1 SV=1 - [TBA1B_HUMAN]	KLADQCTGLQGFLVFHSFGGGTGSGFTSLLMER	[6] DesthioBiotinIAM(new)	-0.545446	-0.866966	-1.10469	940.225	74.2824	3756.87	4	-1.34244	2.4495e+07	3.12176e+07	4.25745e+07	4.42759e+07	5.55119e+07	5.56888e+07	4.2294e+07	1.26304e+07	29.8633	2.13717e+07	2.31838e+07	4.23814e+07	2.8979e+07	1.16422e+07	40.1745	1.69455e+07	2.32451e+07	2.93787e+07	2.31897e+07	6.21678e+06	26.8083	8.03374e+06	1.39498e+07	3.70169e+07	1.96668e+07	1.5314e+07	77.8673
O00429	Dynamin-1-like protein OS=Homo sapiens GN=DNM1L PE=1 SV=2 - [DNM1L_HUMAN]	LHDAIVEVVTCLLRK	[11] DesthioBiotinIAM(new)	0.696937	-0.199679	-1.07419	669.061	68.3745	2004.16	3	3.44829	28204.7	39043	46236.4	66909	71511.6	84428.9	56055.6	21555.7	38.4542	78278.7	93460	100870	90869.5	11516.2	12.6733	27881.1	31786.5	86762.7	48810.1	32925.9	67.457	20668.3	20679.2	38521.1	26622.9	10304.2	38.7042
P04075	Fructose-bisphosphate aldolase A OS=Homo sapiens GN=ALDOA PE=1 SV=2 - [ALDOA_HUMAN]	QLLLTADDRVNPCIGGVILFHETLYQK	[13] DesthioBiotinIAM(new)	-0.0408983	-0.269333	-1.07267	1118.28	68.6437	3351.82	3	4.41062	1.5366e+06	1.82568e+06	2.01503e+06	2.05955e+06	2.26908e+06	2.4015e+06	2.01791e+06	310024	15.3636	984324	2.10202e+06	2.79817e+06	1.96151e+06	915051	46.6504	1.15384e+06	1.85193e+06	2.01701e+06	1.67426e+06	458191	27.3667	914723	923395	1.04005e+06	959389	69987.4	7.295
Q9UJM3	ERBB receptor feedback inhibitor 1 OS=Homo sapiens GN=ERRFI1 PE=1 SV=1 - [ERRFI_HUMAN]	SAPMNGHCFAENGPSQK	[4] Oxidation|[8] DesthioBiotinIAM(new)	-0.59192	-0.589882	-1.03094	696.322	40.7377	2085.94	3	3.41268	334241	416547	498076	505758	520122	613959	481451	95712.2	19.88	282851	316478	358940	319423	38129.9	11.9371	249121	293971	416532	319875	86659.7	27.0918	91286.4	234568	380998	235618	144859	61.4804
O14980	Exportin-1 OS=Homo sapiens GN=XPO1 PE=1 SV=1 - [XPO1_HUMAN]	FLVTVIKDLLGLCEQKR	[13] DesthioBiotinIAM(new)	0.383593	0.592881	-0.989323	568.589	73.0495	2270.33	4	4.38816	172198	293489	297397	321852	339113	342996	294508	63336.4	21.5059	330352	405961	416319	384211	46929.3	12.2145	428045	442727	461807	444193	16928.7	3.81113	119612	135405	190026	148348	36948.2	24.9065
Q01469	Fatty acid-binding protein, epidermal OS=Homo sapiens GN=FABP5 PE=1 SV=3 - [FABP5_HUMAN]	MGAMAKPDCIITCDGK	[1] Oxidation|[4] Oxidation|[9] DesthioBiotinIAM(new)|[13] Carbamidomethyl	-0.195932	-0.938357	-0.974451	680.321	46.7909	2037.94	3	2.88048	728023	754837	966815	1.16691e+06	1.5412e+06	1.84092e+06	1.16645e+06	446505	38.279	529376	1.20557e+06	1.32001e+06	1.01832e+06	427287	41.9599	288503	336586	1.20096e+06	608684	513492	84.361	405017	485505	890413	593645	260140	43.8208
P38646	Stress-70 protein, mitochondrial OS=Homo sapiens GN=HSPA9 PE=1 SV=2 - [GRP75_HUMAN]	MEEFKDQLPADECNK	[1] Oxidation|[13] DesthioBiotinIAM(new)	-0.250979	-0.792682	-0.965462	703.662	48.4678	2107.96	3	3.80881	206988	249412	382710	400437	414838	515439	361637	113970	31.515	197796	355127	358757	303893	91900.9	30.2412	86456.9	128150	411680	208762	176964	84.7682	122329	170520	262750	185200	71352.1	38.5271
P31947	14-3-3 protein sigma OS=Homo sapiens GN=SFN PE=1 SV=1 - [1433S_HUMAN]	VETELQGVCDTVLGLLDSHLIK	[9] DesthioBiotinIAM(new)	-0.165025	-0.235494	-0.935688	893.491	79.775	2677.45	3	6.15349	2.42616e+06	2.42887e+06	2.50149e+06	3.21332e+06	3.2459e+06	3.61689e+06	2.90544e+06	517082	17.7971	2.15324e+06	2.78669e+06	2.83426e+06	2.5914e+06	380201	14.6717	1.64977e+06	2.31247e+06	3.44134e+06	2.46786e+06	905839	36.7054	1.11273e+06	1.27699e+06	2.1671e+06	1.51894e+06	567301	37.3484
Q1KMD3	Heterogeneous nuclear ribonucleoprotein U-like protein 2 OS=Homo sapiens GN=HNRNPUL2 PE=1 SV=1 - [HNRL2_HUMAN]	VTQNLPMKEGCTEVSLLR	[7] Oxidation|[11] DesthioBiotinIAM(new)	-0.0598853	-0.421575	-0.93501	777.415	52.6601	2329.22	3	4.82332	1.48325e+07	1.48727e+07	2.29397e+07	2.3581e+07	3.02799e+07	3.12853e+07	2.29652e+07	7.13778e+06	31.0809	1.63267e+07	2.23344e+07	2.74332e+07	2.20314e+07	5.55942e+06	25.234	9.9066e+06	1.33083e+07	2.82231e+07	1.7146e+07	9.74267e+06	56.8218	7.98929e+06	1.04484e+07	1.75974e+07	1.20117e+07	4.99115e+06	41.5525
P41567	Eukaryotic translation initiation factor 1 OS=Homo sapiens GN=EIF1 PE=1 SV=1 - [EIF1_HUMAN]	NICQFLVEIGLAKDDQLK	[3] DesthioBiotinIAM(new)	0.131633	-0.460593	-0.915049	781.765	73.6102	2342.27	3	2.68039	443700	481518	487003	579141	662798	740363	565754	116858	20.6553	362813	632674	863919	619802	250801	40.4647	381454	405907	446018	411126	32597.1	7.92874	278138	299992	321971	300034	21916.7	7.30473
Q01469	Fatty acid-binding protein, epidermal OS=Homo sapiens GN=FABP5 PE=1 SV=3 - [FABP5_HUMAN]	KMGAMAKPDCIITCDGK	[2] Oxidation|[5] Oxidation|[10] Carbamidomethyl|[14] DesthioBiotinIAM(new)	-0.186123	-0.952699	-0.905222	542.517	42.4554	2166.04	4	3.41324	177617	240139	318051	367594	484594	576740	360789	149629	41.4726	150222	390306	410834	317121	144903	45.6933	63995.1	123137	372089	186407	163502	87.7123	139685	156616	281629	192644	77527.5	40.244
P07339	Cathepsin D OS=Homo sapiens GN=CTSD PE=1 SV=1 - [CATD_HUMAN]	AIGAVPLIQGEYMIPCEK	[13] Oxidation|[16] DesthioBiotinIAM(new)	-0.604293	-0.773089	-0.9041	748.733	66.1757	2243.18	3	4.11969	8.47431e+06	8.82204e+06	8.85703e+06	9.82276e+06	1.06775e+07	1.22033e+07	9.8095e+06	1.42471e+06	14.5238	5.23055e+06	6.98214e+06	7.1452e+06	6.45263e+06	1.06149e+06	16.4505	2.87043e+06	4.59156e+06	9.75849e+06	5.74016e+06	3.5848e+06	62.4512	4.8516e+06	4.86234e+06	6.01166e+06	5.24187e+06	666681	12.7184
Q6IQ49	Protein SDE2 homolog OS=Homo sapiens GN=SDE2 PE=1 SV=1 - [SDE2_HUMAN]	HILEDSCAELGESKEHMESR	[7] DesthioBiotinIAM(new)|[17] Oxidation	0.0429506	-0.427656	-0.881711	653.809	43.2795	2611.21	4	2.44137	459481	525255	547906	590328	622374	643485	564805	67969.1	12.0341	442036	635080	668502	581872	122250	21.0097	357247	448386	454111	419915	54347.1	12.9424	288641	304084	326874	306533	19234.1	6.27474
O60664	Perilipin-3 OS=Homo sapiens GN=PLIN3 PE=1 SV=3 - [PLIN3_HUMAN]	TVCDAAEK	[3] DesthioBiotinIAM(new)	-0.800489	-0.327683	-0.856169	566.79	39.5151	1131.56	2	4.50029	98653.3	118066	118178	145181	175936	176980	138832	32693.6	23.549	67545.8	85111.7	86476.3	79711.3	10557.6	13.2449	80320.5	116325	135226	110624	27893	25.2143	55819.5	86911.5	87349.3	76693.4	18078.7	23.5726
Q9C0C2	182 kDa tankyrase-1-binding protein OS=Homo sapiens GN=TNKS1BP1 PE=1 SV=4 - [TB182_HUMAN]	NLEVSSCVGSGGSSEAR	[7] DesthioBiotinIAM(new)	-0.272052	-0.780866	-0.844121	967.967	49.7758	1933.92	2	1.66376	1.96792e+06	2.28732e+06	2.44417e+06	3.79373e+06	3.85878e+06	3.89887e+06	3.0418e+06	899674	29.577	2.05943e+06	2.59968e+06	2.898e+06	2.51904e+06	425062	16.874	1.45788e+06	1.47938e+06	2.37389e+06	1.77038e+06	522762	29.5282	1.40649e+06	1.42229e+06	2.25453e+06	1.69443e+06	485119	28.6301
P49137	MAP kinase-activated protein kinase 2 OS=Homo sapiens GN=MAPKAPK2 PE=1 SV=1 - [MAPK2_HUMAN]	ASQCPHIVR	[4] DesthioBiotinIAM(new)	-0.0879467	-0.477916	-0.841449	436.242	40.9611	1305.7	3	4.50034	87784.3	89014.7	99395.5	99662.9	100363	105520	96956.7	7005.87	7.22578	75731.4	94761.8	103175	91222.8	14059.9	15.4128	31632.8	84993	92223	69616.3	33092.7	47.5359	13220.9	71157.5	77951.3	54109.9	35573.4	65.7429
P17858	6-phosphofructokinase, liver type OS=Homo sapiens GN=PFKL PE=1 SV=6 - [K6PL_HUMAN]	TYSHLNIAGLVGSIDNDFCGTDMTIGTDSALHR	[19] DesthioBiotinIAM(new)|[23] Oxidation	-0.398986	-0.26072	-0.811166	952.454	69.6115	3805.79	4	-4.42689	349442	430428	449946	567709	610376	629165	506178	112459	22.2173	300890	338318	512434	383881	112893	29.4083	337884	428293	501298	422492	81861.3	19.3758	234755	269667	361022	288481	65202.1	22.6018
Q8TC12	Retinol dehydrogenase 11 OS=Homo sapiens GN=RDH11 PE=1 SV=2 - [RDH11_HUMAN]	HLHVLINNAGVMMCPYSK	[12] Oxidation|[13] Oxidation|[14] DesthioBiotinIAM(new)	-0.167588	-0.647437	-0.804192	589.553	48.9436	2354.18	4	4.89829	77607	87268.4	109532	123929	154483	163401	119370	34825.1	29.174	85582.4	102842	130413	106279	22611.9	21.276	53830.2	55339.9	119453	76207.5	37458.9	49.1538	57570.7	58795.4	88717.6	68361.2	17639.7	25.8037
Q9NX18	Succinate dehydrogenase assembly factor 2, mitochondrial OS=Homo sapiens GN=SDHAF2 PE=1 SV=1 - [SDHF2_HUMAN]	GMLENCILLSLFAK	[2] Oxidation|[6] DesthioBiotinIAM(new)	-0.577013	-0.459376	-0.803543	622.01	77.4651	1863.01	3	4.82177	294756	298150	299688	315523	410271	447319	344284	66884.8	19.4272	155616	237346	299411	230791	72121.3	31.2496	111438	210472	429285	250398	162641	64.953	177575	205482	208707	197255	17118.8	8.67853
P09382	Galectin-1 OS=Homo sapiens GN=LGALS1 PE=1 SV=2 - [LEG1_HUMAN]	SFVLNLGKDSNNLCLHFNPR	[14] DesthioBiotinIAM(new)	0.0750167	-1.0615	-0.803452	646.846	61.7351	2583.35	4	5.98488	59952.4	62398	71064.1	73883.3	76710.5	85447.3	71575.9	9420.24	13.1612	47289.1	88831	90068.4	75396.2	24349.3	32.2951	18283.2	36706	47894	34294.4	14952	43.5988	33295.3	43945.4	45793.3	41011.3	6745.9	16.4489
Q96GX9	Methylthioribulose-1-phosphate dehydratase OS=Homo sapiens GN=APIP PE=1 SV=1 - [MTNB_HUMAN]	KCTSGGYYR	[2] DesthioBiotinIAM(new)	0.168856	-0.847569	-0.795035	444.226	37.2143	1329.65	3	3.61035	3593.86	4537.87	5017.77	5101.58	5701.26	6961.8	5152.36	1131.6	21.9627	3731.37	5973.89	7671.07	5792.11	1976.13	34.1176	1588.66	2636.78	4364.37	2863.27	1401.65	48.9526	2167.26	2875.18	3865.93	2969.45	853.251	28.7343
Q9NS86	LanC-like protein 2 OS=Homo sapiens GN=LANCL2 PE=1 SV=1 - [LANC2_HUMAN]	SVVCQESDLPDELLYGR	[4] DesthioBiotinIAM(new)	-0.281591	-0.0375887	-0.793976	740.372	67.3009	2218.09	3	0.32001	408084	495774	588814	676438	690207	690988	591718	118040	19.9487	347814	509282	603293	486796	129215	26.5439	357573	683041	688885	576500	189618	32.8913	295548	353879	374396	341275	40907.3	11.9866
P45880	Voltage-dependent anion-selective channel protein 2 OS=Homo sapiens GN=VDAC2 PE=1 SV=2 - [VDAC2_HUMAN]	SCSGVEFSTSGSSNTDTGK	[2] DesthioBiotinIAM(new)	-0.321499	-0.293081	-0.791977	1073.99	49.4694	2145.96	2	5.12687	3.38665e+06	3.46956e+06	3.47192e+06	3.53209e+06	3.66669e+06	3.84437e+06	3.56188e+06	166730	4.68094	2.58506e+06	2.92075e+06	3.04524e+06	2.85035e+06	238029	8.35088	1.82202e+06	3.31867e+06	3.58047e+06	2.90705e+06	948738	32.6357	1.75953e+06	2.06716e+06	2.34483e+06	2.05717e+06	292777	14.232
Q8NBS9	Thioredoxin domain-containing protein 5 OS=Homo sapiens GN=TXNDC5 PE=1 SV=2 - [TXND5_HUMAN]	VDCTAHSDVCSAQGVR	[3] Carbamidomethyl|[10] DesthioBiotinIAM(new)	-0.152799	-0.573189	-0.784007	667.65	41.7198	1999.93	3	4.20064	675112	678375	683347	795088	801331	819316	742095	69683	9.39003	570671	701236	730644	667517	85150.1	12.7562	489544	499178	507629	498784	9048.76	1.81416	394515	433344	465059	430973	35331.9	8.19817
Q16637	Survival motor neuron protein OS=Homo sapiens GN=SMN1 PE=1 SV=1 - [SMN_HUMAN]	NGDICETSGKPK	[5] DesthioBiotinIAM(new)	-0.0987153	-0.446097	-0.782593	515.598	37.0752	1543.77	3	3.59355	11706.1	13700.6	14344.6	20520.3	38104.9	41673.1	23341.6	13200.3	56.5526	15858.5	19321.7	30213.5	21797.9	7490.99	34.3657	15816.3	15861.8	19722	17133.3	2241.96	13.0854	12587.1	13933.8	14186	13569	859.643	6.33536
P22307	Non-specific lipid-transfer protein OS=Homo sapiens GN=SCP2 PE=1 SV=2 - [NLTP_HUMAN]	AIYHSLGMTGIPIINVNNNCATGSTALFMAR	[20] DesthioBiotinIAM(new)	-0.149353	-0.244295	-0.780099	887.463	70.5052	3545.82	4	7.47941	210009	235191	237947	799962	1.11418e+06	1.21456e+06	635308	467082	73.5206	241547	364999	1.11194e+06	572828	470947	82.2143	221247	253194	1.13459e+06	536345	518344	96.6439	150681	466579	492610	369957	190344	51.4503
O95171	Sciellin OS=Homo sapiens GN=SCEL PE=1 SV=2 - [SCEL_HUMAN]	QTIHCEPCYSK	[5] DesthioBiotinIAM(new)|[8] Carbamidomethyl	0.161419	-0.0833541	-0.771467	554.6	40.9797	1660.78	3	4.58625	80376.3	80433.3	98538.8	120953	132535	137386	108370	25475.4	23.5077	82737.4	104465	176398	121200	49021.9	40.4471	89280.5	103169	114410	102287	12587.9	12.3065	52620.5	68422.3	69414.3	63485.7	9422.6	14.8421
P49662	Caspase-4 OS=Homo sapiens GN=CASP4 PE=1 SV=1 - [CASP4_HUMAN]	AHPNMEAGPPESGESTDALKLCPHEEFLR	[5] Oxidation|[22] DesthioBiotinIAM(new)	-0.150598	-0.586094	-0.771129	695.737	52.5327	3473.65	5	4.55224	261828	354594	409064	498812	517775	520926	427166	104943	24.5672	262416	397159	494899	384824	116731	30.3336	193158	245544	414961	284554	115933	40.742	173156	229389	348361	250302	89454.8	35.7388
O00410	Importin-5 OS=Homo sapiens GN=IPO5 PE=1 SV=4 - [IPO5_HUMAN]	QAAAYGLGVMAQYGGDNYRPFCTEALPLLVR	[22] DesthioBiotinIAM(new)	0.0920532	-0.410355	-0.768418	1214.29	73.2717	3639.85	3	4.10789	360784	394526	513499	620291	628054	671508	531443	130414	24.5395	508044	594811	596519	566458	50595	8.93182	333480	401544	464611	399878	65581.7	16.4004	247049	276835	412086	311990	87955.7	28.1919
P63151	Serine/threonine-protein phosphatase 2A 55 kDa regulatory subunit B alpha isoform OS=Homo sapiens GN=PPP2R2A PE=1 SV=1 - [2ABA_HUMAN]	ASALCDR	[5] DesthioBiotinIAM(new)	-0.471303	-0.356502	-0.749672	516.271	43.1813	1030.53	2	4.30135	97289.8	162127	426410	520270	562679	565163	388990	208036	53.4812	137031	317034	387686	280583	129242	46.0619	69562.5	362402	479504	303823	211156	69.4996	76249.8	268188	349604	231347	140352	60.667
Q8IZW8	Tensin-4 OS=Homo sapiens GN=TNS4 PE=1 SV=3 - [TENS4_HUMAN]	TPGHQNSVQPGAASPSNPCPATR	[19] DesthioBiotinIAM(new)	-0.375398	-0.350701	-0.74073	857.426	41.6972	2569.26	3	3.90321	832858	834981	859771	913644	935411	971850	891419	57471	6.44714	445597	718245	897724	687189	227658	33.1289	645272	725531	726359	699054	46578.5	6.66308	445763	561086	593524	533458	77658.3	14.5575
P40939	Trifunctional enzyme subunit alpha, mitochondrial OS=Homo sapiens GN=HADHA PE=1 SV=2 - [ECHA_HUMAN]	ALMGLYHGQVLCKK	[3] Oxidation|[12] DesthioBiotinIAM(new)	0.0697183	-0.436231	-0.738299	469.013	47.1306	1872.02	4	5.76619	144979	168162	169035	195171	205808	207979	181855	25080.7	13.7915	176771	194817	200991	190859	12585.4	6.59407	82679.1	117505	203023	134403	61926	46.075	85591.6	102097	139349	109012	27537.9	25.2612
Q9BW61	DET1- and DDB1-associated protein 1 OS=Homo sapiens GN=DDA1 PE=1 SV=1 - [DDA1_HUMAN]	FHADSVCK	[7] DesthioBiotinIAM(new)	-0.138137	-0.508473	-0.727336	401.539	40.4742	1201.6	3	3.85087	56572.5	57302.1	59800.5	60260.5	67057.3	68664.5	61609.6	5068.9	8.22745	38537.8	51412.8	78001.8	55984.1	20125.2	35.9481	810.372	63915.6	65202.3	43309.4	36810.9	84.9951	9545.74	44589.6	57504.5	37213.3	24815.7	66.685
P17655	Calpain-2 catalytic subunit OS=Homo sapiens GN=CAPN2 PE=1 SV=6 - [CAN2_HUMAN]	MPCQLHQVIVAR	[1] Oxidation|[3] DesthioBiotinIAM(new)	-0.430853	-0.59774	-0.71379	569.647	48.0255	1705.92	3	3.93404	707144	847755	857016	1.4683e+06	1.64752e+06	1.68159e+06	1.20155e+06	444700	37.0104	485501	917016	1.2715e+06	891340	393630	44.1616	462520	587641	1.33176e+06	793972	469917	59.1856	602173	751974	843672	732607	121909	16.6404
P62913	60S ribosomal protein L11 OS=Homo sapiens GN=RPL11 PE=1 SV=2 - [RL11_HUMAN]	IAVHCTVR	[5] DesthioBiotinIAM(new)	0.210901	-0.246759	-0.705084	398.899	41.1203	1193.68	3	4.73956	34603.3	36209.2	36255.1	37626.2	39533.1	40949.4	37529.4	2351.57	6.26596	41080.8	43753.9	45476.1	43436.9	2214.76	5.09879	27527.6	28498.4	38861.9	31629.3	6282.4	19.8626	77.5578	33930.9	35053.8	23020.8	19877.3	86.3452
Q7Z5J4	Retinoic acid-induced protein 1 OS=Homo sapiens GN=RAI1 PE=1 SV=2 - [RAI1_HUMAN]	FVAGERDCPR	[8] DesthioBiotinIAM(new)	-0.07926	-0.168558	-0.697661	482.584	40.7691	1444.73	3	4.56776	248729	249307	266828	300046	302895	330532	283056	33217.1	11.7351	198171	275838	329766	267925	66153.4	24.691	225810	249838	279885	251844	27092.9	10.7578	56462.1	227130	239981	174524	102447	58.7005
P60709	Actin, cytoplasmic 1 OS=Homo sapiens GN=ACTB PE=1 SV=1 - [ACTB_HUMAN]	CPEALFQPSFLGMESCGIHETTFNSIMK	[1] Carbamidomethyl|[13] Oxidation|[16] DesthioBiotinIAM(new)|[27] Oxidation	-0.427492	-0.629856	-0.694141	1168.21	66.2225	3501.62	3	4.16683	3.79066e+07	3.8753e+07	5.11841e+07	1.0425e+08	1.09146e+08	1.09258e+08	7.5083e+07	3.59224e+07	47.8435	3.27146e+07	3.63683e+07	9.84018e+07	5.58282e+07	3.6915e+07	66.1225	1.61743e+07	2.92248e+07	1.00166e+08	4.85217e+07	4.51988e+07	93.1517	3.56372e+07	4.33719e+07	6.02122e+07	4.64071e+07	1.25655e+07	27.0767
O00299	Chloride intracellular channel protein 1 OS=Homo sapiens GN=CLIC1 PE=1 SV=4 - [CLIC1_HUMAN]	FLDGNELTLADCNLLPK	[12] DesthioBiotinIAM(new)	-0.156195	-0.195013	-0.691598	1086.57	71.5981	2171.13	2	1.23554	840306	913962	946462	947246	1.00956e+06	1.03269e+06	948371	68877.6	7.26273	828649	855995	868528	851057	20393.2	2.39622	758254	779917	947220	828464	103415	12.4827	572925	573733	614944	587200	24029.8	4.09226
Q9Y570	Protein phosphatase methylesterase 1 OS=Homo sapiens GN=PPME1 PE=1 SV=3 - [PPME1_HUMAN]	FQMQVLPQCGHAVHEDAPDKVAEAVATFLIR	[3] Oxidation|[9] DesthioBiotinIAM(new)	-0.31166	-0.376278	-0.689723	747.389	68.2781	3731.91	5	4.15897	2.63453e+06	2.64065e+06	3.05418e+06	3.63924e+06	4.24304e+06	4.31801e+06	3.42161e+06	760270	22.2197	2.16392e+06	2.60286e+06	3.50373e+06	2.75684e+06	683046	24.7764	2.08855e+06	2.14289e+06	3.67682e+06	2.63608e+06	901712	34.2065	1.68754e+06	1.88497e+06	2.7914e+06	2.1213e+06	588659	27.7499
Q8NC26	Zinc finger protein 114 OS=Homo sapiens GN=ZNF114 PE=2 SV=1 - [ZN114_HUMAN]	VCLTSISSQHSTLR	[2] DesthioBiotinIAM(new)	0.0143546	0.463768	-0.687169	610	51.0291	1826.98	3	5.68753	45374.6	53546.1	58246.8	58456.5	63390	73088.3	58683.7	9310.34	15.8653	54559.1	55458.7	67793.9	59270.6	7395.11	12.4769	67046.4	83935.7	91817.2	80933.1	12655.4	15.6369	23556.4	25116.4	60667.7	36446.8	20990.4	57.5918
Q8IZW8	Tensin-4 OS=Homo sapiens GN=TNS4 PE=1 SV=3 - [TENS4_HUMAN]	CHDGPQHCSSPSVTPPFGSLR	[1] DesthioBiotinIAM(new)|[8] Carbamidomethyl	-0.369549	-0.578686	-0.685985	641.307	49.638	2561.2	4	4.05307	348795	364771	366347	372679	395570	397142	374217	18875	5.04386	232748	308151	328060	289653	50276.9	17.3576	235930	254735	261033	250566	13060.6	5.21243	215389	239404	243026	232606	15020.2	6.45735
Q8NBS9	Thioredoxin domain-containing protein 5 OS=Homo sapiens GN=TXNDC5 PE=1 SV=2 - [TXND5_HUMAN]	VDCTQHYELCSGNQVR	[3] DesthioBiotinIAM(new)|[10] Carbamidomethyl	-0.178303	-0.446174	-0.675831	735.68	47.1623	2204.02	3	4.2315	589483	592686	603188	607965	619195	699760	618713	41127	6.64719	490763	558770	590814	546782	51091	9.34394	379435	489123	493824	454127	64728	14.2533	365474	387472	408944	387297	21735.9	5.61221
Q14533	Keratin, type II cuticular Hb1 OS=Homo sapiens GN=KRT81 PE=1 SV=3 - [KRT81_HUMAN]	LCEGIGAVNVCVSSSR	[2] DesthioBiotinIAM(new)|[11] Carbamidomethyl	-0.245774	-0.395529	-0.675517	649.667	57.4438	1945.98	3	4.13252	103625	110291	111903	114714	117464	121139	113189	6088	5.37861	89423.4	95309.1	101646	95459.6	6112.74	6.40349	85060.4	86288.5	86793.8	86047.6	891.424	1.03597	66292.9	72907.6	73405.3	70868.6	3970.51	5.60263
P37802	Transgelin-2 OS=Homo sapiens GN=TAGLN2 PE=1 SV=3 - [TAGL2_HUMAN]	DGTVLCELINALYPEGQAPVKK	[6] DesthioBiotinIAM(new)	-0.164217	-0.319826	-0.672185	885.483	77.5669	2653.43	3	4.9077	4.99876e+07	5.10651e+07	5.66336e+07	5.80935e+07	6.65894e+07	6.7226e+07	5.82659e+07	7.38431e+06	12.6735	4.50369e+07	5.39707e+07	5.6984e+07	5.19972e+07	6.21323e+06	11.9492	3.29963e+07	5.23422e+07	5.47034e+07	4.66807e+07	1.19096e+07	25.513	3.23209e+07	3.5962e+07	4.14124e+07	3.65651e+07	4.57565e+06	12.5137
Q07352	Zinc finger protein 36, C3H1 type-like 1 OS=Homo sapiens GN=ZFP36L1 PE=1 SV=1 - [TISB_HUMAN]	MLNYSAPSAGGCLLDRK	[1] Oxidation|[12] DesthioBiotinIAM(new)	-0.722531	-0.880726	-0.670816	703.363	53.3942	2107.07	3	5.58326	170747	196641	243159	256303	256765	291883	235916	44327.3	18.7894	122326	144030	162563	142973	20139.1	14.0859	78270.4	85919.9	220184	128125	79817.2	62.2965	113585	138785	192204	148191	40144.6	27.0897
Q14192	Four and a half LIM domains protein 2 OS=Homo sapiens GN=FHL2 PE=1 SV=3 - [FHL2_HUMAN]	CQQPIGTK	[1] DesthioBiotinIAM(new)	-0.23075	0.279618	-0.667797	585.822	41.2188	1169.63	2	5.03212	66608.3	87943.7	99692.2	232199	263653	312006	177017	104763	59.1823	62156.8	129076	261325	150853	101354	67.1874	104773	253378	286478	214876	96777.8	45.0388	89042.2	109626	135611	111426	23336.7	20.9436
P06737	Glycogen phosphorylase, liver form OS=Homo sapiens GN=PYGL PE=1 SV=4 - [PYGL_HUMAN]	LAACFLDSMATLGLAAYGYGIR	[4] DesthioBiotinIAM(new)|[9] Oxidation	-0.315073	-0.361886	-0.664673	863.78	74.692	2588.32	3	2.43386	306190	319774	419479	452594	457140	486592	406962	75966.5	18.6667	278366	306470	396524	327120	61726.4	18.8696	206791	210358	532878	316676	187245	59.1283	225475	260249	284449	256724	29644.2	11.5471
Q13547	Histone deacetylase 1 OS=Homo sapiens GN=HDAC1 PE=1 SV=1 - [HDAC1_HUMAN]	ISICSSDKR	[4] DesthioBiotinIAM(new)	0.104653	-1.25985	-0.662819	435.572	42.7206	1303.69	3	0.986073	284367	331624	357571	445216	453581	478792	391858	78195.2	19.955	366998	431877	465146	421340	49915.3	11.8468	130120	167606	193180	163635	31716.7	19.3826	212143	235680	294721	247515	42542.2	17.1877
P53634	Dipeptidyl peptidase 1 OS=Homo sapiens GN=CTSC PE=1 SV=2 - [CATC_HUMAN]	NQASCGSCYSFASMGMLEAR	[5] Carbamidomethyl|[8] DesthioBiotinIAM(new)|[14] Oxidation|[16] Oxidation	-0.704484	-0.797529	-0.657342	833.36	55.0465	2497.06	3	3.80212	5.78289e+06	5.86983e+06	7.47179e+06	1.06831e+07	1.06991e+07	1.11516e+07	8.60972e+06	2.5266e+06	29.3459	3.64037e+06	4.45552e+06	7.75449e+06	5.28346e+06	2.17844e+06	41.2314	2.45169e+06	2.54954e+06	9.85916e+06	4.95346e+06	4.24874e+06	85.7731	3.84132e+06	4.31739e+06	8.21815e+06	5.45895e+06	2.40136e+06	43.9894
Q5EBL4	RILP-like protein 1 OS=Homo sapiens GN=RILPL1 PE=1 SV=1 - [RIPL1_HUMAN]	VIDQHGCEAIAR	[7] DesthioBiotinIAM(new)	-0.0645516	-0.330051	-0.654801	536.616	43.1657	1606.83	3	1.21109	378293	392213	409454	416068	436606	450431	413844	26880.3	6.49528	333717	337429	516060	395735	104221	26.3359	311494	328686	347470	329217	17993.5	5.46555	239172	250411	298992	262859	31792.9	12.0951
P00338	L-lactate dehydrogenase A chain OS=Homo sapiens GN=LDHA PE=1 SV=2 - [LDHA_HUMAN]	GLYGIKDDVFLSVPCILGQNGISDLVK	[15] DesthioBiotinIAM(new)	-0.0853914	-0.417942	-0.652022	1053.91	77.8156	3158.72	3	5.19306	5.67526e+07	6.04028e+07	6.81645e+07	6.95842e+07	7.19258e+07	7.52084e+07	6.70064e+07	7.04566e+06	10.5149	5.40312e+07	6.00955e+07	7.53397e+07	6.31555e+07	1.09789e+07	17.3839	3.32576e+07	5.65461e+07	6.06575e+07	5.01537e+07	1.47762e+07	29.4618	3.95963e+07	4.3387e+07	4.49429e+07	4.26421e+07	2.75008e+06	6.44921
Q9Y2B0	Protein canopy homolog 2 OS=Homo sapiens GN=CNPY2 PE=1 SV=1 - [CNPY2_HUMAN]	RTDLCDHALHISHDEL	[5] DesthioBiotinIAM(new)	-0.12836	-0.0342195	-0.646924	543.525	49.9104	2170.07	4	5.36963	274634	295660	300494	305069	313284	323098	302040	16572.6	5.48688	259929	281949	287105	276328	14433.5	5.22333	292256	295310	297315	294960	2547.27	0.863598	181618	195025	202042	192895	10377.5	5.37988
O00244	Copper transport protein ATOX1 OS=Homo sapiens GN=ATOX1 PE=1 SV=1 - [ATOX1_HUMAN]	HEFSVDMTCGGCAEAVSR	[7] Oxidation|[9] DesthioBiotinIAM(new)|[12] Carbamidomethyl	-0.346992	-0.383581	-0.641689	756.669	48.2275	2266.98	3	2.97894	348410	353108	421794	613354	666976	704106	517958	161943	31.2656	361247	371624	488818	407230	70848	17.3975	222725	318754	649616	397032	223952	56.4066	291665	297463	406846	331992	64891	19.546
Q27J81	Inverted formin-2 OS=Homo sapiens GN=INF2 PE=1 SV=2 - [INF2_HUMAN]	QEEVCVIDALLADIRK	[5] DesthioBiotinIAM(new)	-0.312321	-0.121733	-0.63563	704.393	73.368	2110.16	3	5.08661	109056	131868	141530	143786	174786	177090	146353	26014.9	17.7755	75066.2	133637	144890	117864	37489	31.8069	88398	156036	159096	134510	39963.6	29.7105	90881.6	91236.3	100486	94201.3	5445.56	5.78077
P31947	14-3-3 protein sigma OS=Homo sapiens GN=SFN PE=1 SV=1 - [1433S_HUMAN]	EKVETELQGVCDTVLGLLDSHLIK	[11] DesthioBiotinIAM(new)	0.0791864	-0.313304	-0.633989	734.656	77.2171	2934.59	4	6.69167	4.86869e+06	4.88156e+06	5.76847e+06	6.42416e+06	6.63761e+06	6.7411e+06	5.88693e+06	853622	14.5003	5.66336e+06	5.99297e+06	7.00093e+06	6.21908e+06	696864	11.2052	4.05256e+06	4.67584e+06	5.48494e+06	4.73778e+06	718194	15.1589	3.2876e+06	3.32479e+06	4.76808e+06	3.79349e+06	844225	22.2546
Q9P0L0	Vesicle-associated membrane protein-associated protein A OS=Homo sapiens GN=VAPA PE=1 SV=3 - [VAPA_HUMAN]	CVFEMPNENDKLNDMEPSK	[1] DesthioBiotinIAM(new)|[5] Oxidation|[15] Oxidation	-0.201629	-0.922888	-0.625433	856.722	50.5304	2567.14	3	3.99948	621334	798472	939151	1.54829e+06	1.70999e+06	1.74689e+06	1.22736e+06	498021	40.5767	474310	1.15466e+06	1.57283e+06	1.06727e+06	554451	51.9505	279604	341118	1.32139e+06	647371	584528	90.2926	463798	792776	1.13023e+06	795603	333227	41.8836
Q9H7Z7	Prostaglandin E synthase 2 OS=Homo sapiens GN=PTGES2 PE=1 SV=1 - [PGES2_HUMAN]	TCPFCSK	[2] DesthioBiotinIAM(new)|[5] Carbamidomethyl	-0.330986	-0.485939	-0.625143	569.775	47.5057	1137.54	2	4.34988	7.3662e+06	7.39552e+06	8.14405e+06	8.2655e+06	8.46266e+06	8.48279e+06	8.01945e+06	510531	6.36615	6.15586e+06	6.3943e+06	6.57607e+06	6.37541e+06	210740	3.30551	5.11654e+06	5.39404e+06	6.66786e+06	5.72615e+06	827265	14.4471	4.92197e+06	5.28187e+06	5.39453e+06	5.19946e+06	246825	4.74713
Q9P2B4	CTTNBP2 N-terminal-like protein OS=Homo sapiens GN=CTTNBP2NL PE=1 SV=2 - [CT2NL_HUMAN]	TNGHCDPEIQTTR	[5] DesthioBiotinIAM(new)	0.0890001	0.0375787	-0.621893	589.955	40.8092	1766.84	3	2.99548	187079	222390	224640	242123	253600	255575	230901	25620.3	11.0958	165996	235959	334827	245594	84826.7	34.5394	207419	246094	257471	236995	26237.3	11.0708	96705.5	151158	202267	150044	52789.6	35.1828
Q07065	Cytoskeleton-associated protein 4 OS=Homo sapiens GN=CKAP4 PE=1 SV=2 - [CKAP4_HUMAN]	SSSSSSASAAAAAAAASSSASCSR	[22] DesthioBiotinIAM(new)	-0.265663	-0.171793	-0.616784	777.032	49.0879	2328.07	3	5.15376	544231	611804	694024	694476	717404	734650	666098	73097.7	10.974	456238	544574	661403	554072	102912	18.5738	524573	584986	664405	591321	70131.2	11.8601	410090	435720	457323	434378	23645.3	5.44348
P00558	Phosphoglycerate kinase 1 OS=Homo sapiens GN=PGK1 PE=1 SV=3 - [PGK1_HUMAN]	FCLDNGAK	[2] DesthioBiotinIAM(new)	-0.353956	-0.411062	-0.610117	582.299	51.7127	1162.58	2	2.02422	290891	308653	318364	335539	354239	384084	331962	33588.1	10.1181	209330	237131	332755	259739	64743.8	24.9265	234316	241326	273333	249658	20800.7	8.33167	176744	202544	273159	217482	49912.7	22.9502
Q13813	Spectrin alpha chain, non-erythrocytic 1 OS=Homo sapiens GN=SPTAN1 PE=1 SV=3 - [SPTN1_HUMAN]	MMLDQCLELQLFHR	[1] Oxidation|[2] Oxidation|[6] DesthioBiotinIAM(new)	-0.299639	-0.495918	-0.608931	702.352	63.7353	2104.03	3	2.89701	116831	123468	163857	287248	298921	345554	222647	99586.1	44.7283	110388	114295	317988	180890	118746	65.6454	95181.1	96733.3	281728	157881	107258	67.9359	67401.7	97906.5	272648	145985	110748	75.8626
Q02790	Peptidyl-prolyl cis-trans isomerase FKBP4 OS=Homo sapiens GN=FKBP4 PE=1 SV=3 - [FKBP4_HUMAN]	LASHLNLAMCHLK	[9] Oxidation|[10] DesthioBiotinIAM(new)	-0.31772	-0.602956	-0.604191	441.494	46.5316	1761.95	4	5.11936	238307	238962	339044	403623	442742	476544	356537	102135	28.6465	249344	274638	334206	286063	43568.9	15.2305	131193	215210	357833	234745	114576	48.8087	166819	194628	342186	234544	94251.3	40.1848
P31947	14-3-3 protein sigma OS=Homo sapiens GN=SFN PE=1 SV=1 - [1433S_HUMAN]	EKVETELQGVCDTVLGLLDSHLIKEAGDAESR	[11] DesthioBiotinIAM(new)	0.046732	0.0592673	-0.603656	750.993	74.4678	3749.93	5	3.68255	747853	805521	843209	1.04939e+06	1.06683e+06	1.1323e+06	940849	160871	17.0985	781638	948717	1.18512e+06	971824	202729	20.8607	927241	971412	1.04226e+06	980305	58022.7	5.91885	509098	537812	810563	619158	166383	26.8724
Q6KB66	Keratin, type II cytoskeletal 80 OS=Homo sapiens GN=KRT80 PE=1 SV=2 - [K2C80_HUMAN]	CHIDLSGIVEEVKAQYDAVAAR	[1] DesthioBiotinIAM(new)	-0.0657107	0.0607675	-0.601933	671.605	73.192	2682.39	4	4.22798	669903	809395	914727	1.02712e+06	1.14718e+06	1.19582e+06	960690	202008	21.0274	640712	765959	1.34707e+06	917915	376902	41.0606	938135	1.0336e+06	1.03432e+06	1.00202e+06	55326.9	5.52154	621165	630025	647721	632970	13520.8	2.13609
P49840	Glycogen synthase kinase-3 alpha OS=Homo sapiens GN=GSK3A PE=1 SV=2 - [GSK3A_HUMAN]	KLDHCNIVR	[5] DesthioBiotinIAM(new)	-0.427995	-0.0100357	-0.596556	465.264	38.9268	1392.77	3	3.30131	9996.19	45236.6	50666.8	52135	55902.7	57094.7	45172	17738.7	39.2693	19649.1	29378.9	51700.2	33576.1	16432.6	48.9414	6074.56	56397.2	72104.8	44858.8	34494.2	76.8949	15823	16244.6	57553.3	29873.6	23972.3	80.2456
P38606	V-type proton ATPase catalytic subunit A OS=Homo sapiens GN=ATP6V1A PE=1 SV=2 - [VATA_HUMAN]	WDFTPCK	[6] DesthioBiotinIAM(new)	-0.334896	-0.580648	-0.595681	596.797	58.6098	1191.58	2	4.37115	955477	1.10422e+06	1.21834e+06	2.94416e+06	3.10019e+06	3.80957e+06	2.18866e+06	1.23833e+06	56.5794	970992	1.12877e+06	3.10601e+06	1.73526e+06	1.18973e+06	68.562	900073	1.06111e+06	2.42924e+06	1.46347e+06	840248	57.4146	564813	828710	2.95139e+06	1.4483e+06	1.30838e+06	90.3388
O00273	DNA fragmentation factor subunit alpha OS=Homo sapiens GN=DFFA PE=1 SV=1 - [DFFA_HUMAN]	QSCATVQR	[3] DesthioBiotinIAM(new)	-0.214913	-0.612883	-0.589968	594.813	38.653	1187.61	2	2.47157	25540.8	35275.8	36660.2	41545.6	53525.8	57488.8	41672.8	11974.5	28.7346	24323.9	31907.3	51484.5	35905.2	14014.8	39.0326	19720.8	28837	33190.3	27249.4	6873.66	25.225	20921.8	25415.5	36719.7	27685.7	8139.95	29.4013
Q9UL36	Zinc finger protein 236 OS=Homo sapiens GN=ZNF236 PE=2 SV=2 - [ZN236_HUMAN]	AHQCLECDRAFSSAAVLMHHSKEVHGR	[7] DesthioBiotinIAM(new)	0.194466	-0.518182	-0.589017	1105.88	73.5765	3314.61	3	4.10677	1.38478e+08	1.38652e+08	1.54269e+08	1.54685e+08	1.67851e+08	1.86603e+08	1.56756e+08	1.83647e+07	11.7154	1.64832e+08	1.65564e+08	2.07734e+08	1.79376e+08	2.45608e+07	13.6923	9.61039e+07	1.11893e+08	1.20369e+08	1.09455e+08	1.23148e+07	11.251	9.49682e+07	9.92856e+07	1.18379e+08	1.04211e+08	1.24583e+07	11.9549
Q9ULT8	E3 ubiquitin-protein ligase HECTD1 OS=Homo sapiens GN=HECTD1 PE=1 SV=3 - [HECD1_HUMAN]	CPFLIPFETR	[1] DesthioBiotinIAM(new)	-0.723527	-0.326913	-0.584263	759.914	70.5217	1517.81	2	4.58985	141670	148459	150700	151315	167062	168344	154592	10724.5	6.93728	90258.5	91464.9	99145.7	93623	4820.7	5.14905	84402.9	125655	159682	123247	37697.4	30.587	86638	105335	117361	103111	15481.6	15.0145
P60981	Destrin OS=Homo sapiens GN=DSTN PE=1 SV=3 - [DEST_HUMAN]	HECQANGPEDLNR	[3] DesthioBiotinIAM(new)	0.0434444	-0.175731	-0.583632	593.616	40.4459	1777.83	3	4.7612	1.26544e+06	1.32394e+06	1.45586e+06	1.47603e+06	1.50878e+06	1.57609e+06	1.43436e+06	117091	8.16327	1.17263e+06	1.53637e+06	1.72563e+06	1.47821e+06	281048	19.0128	1.0537e+06	1.36991e+06	1.38599e+06	1.26986e+06	187379	14.7558	186057	1.2853e+06	1.40001e+06	957121	670220	70.0246
Q8IVF2	Protein AHNAK2 OS=Homo sapiens GN=AHNAK2 PE=1 SV=2 - [AHNK2_HUMAN]	TTDLCIPLPSADLVVQAGQVDMK	[5] DesthioBiotinIAM(new)|[22] Oxidation	-0.343898	-0.0973951	-0.583113	909.48	72.747	2725.42	3	6.07468	707346	775717	864814	873834	888218	965742	845945	91009.6	10.7583	581143	657969	760473	666528	89970.8	13.4984	583906	759463	1.02879e+06	790721	224085	28.3393	498924	580656	614480	564687	59410	10.5209
Q8NBS9	Thioredoxin domain-containing protein 5 OS=Homo sapiens GN=TXNDC5 PE=1 SV=2 - [TXND5_HUMAN]	FYAPWCGHCK	[6] DesthioBiotinIAM(new)|[9] Carbamidomethyl	-0.183491	-0.442793	-0.580338	782.866	54.1225	1563.72	2	3.85445	518626	577117	704199	1.66158e+06	1.96481e+06	1.97968e+06	1.23434e+06	706667	57.2508	557409	618048	2.0853e+06	1.08692e+06	865153	79.5969	557263	559163	1.60791e+06	908111	606043	66.7366	493715	508552	1.47433e+06	825532	561923	68.068
Q9UI30	tRNA methyltransferase 112 homolog OS=Homo sapiens GN=TRMT112 PE=1 SV=1 - [TR112_HUMAN]	TMHHLLLEVEVIEGTLQCPESGR	[2] Oxidation|[18] DesthioBiotinIAM(new)	-0.194243	-0.13217	-0.580209	726.627	64.7743	2902.48	4	3.24439	6.46125e+06	6.93163e+06	7.35592e+06	7.84276e+06	7.93861e+06	8.36451e+06	7.48245e+06	704017	9.40891	5.52429e+06	6.14296e+06	7.95243e+06	6.53989e+06	1.2618e+06	19.2939	6.25473e+06	7.05644e+06	7.17108e+06	6.82742e+06	499264	7.31263	4.40579e+06	4.86308e+06	5.74541e+06	5.00476e+06	680960	13.6062
O60437	Periplakin OS=Homo sapiens GN=PPL PE=1 SV=4 - [PEPL_HUMAN]	FQEHCPDLERQEAEVHK	[5] DesthioBiotinIAM(new)	-0.315509	-0.291642	-0.578557	479.038	43.197	2390.15	5	4.71589	1.00276e+06	1.03764e+06	1.06378e+06	1.12894e+06	1.12915e+06	1.14619e+06	1.08474e+06	58446.3	5.38805	815474	825067	974445	871662	89141.5	10.2266	768097	858312	1.0322e+06	886202	134241	15.1479	637708	745980	795447	726378	80676.1	11.1066
P15407	Fos-related antigen 1 OS=Homo sapiens GN=FOSL1 PE=1 SV=1 - [FOSL1_HUMAN]	RRPCEQISPEEEER	[4] DesthioBiotinIAM(new)	-0.189604	-0.187258	-0.577878	685.344	39.3296	2053.01	3	3.76558	884328	885288	948822	960878	1.02044e+06	1.07101e+06	961794	74014.9	7.6955	745638	778093	1.00631e+06	843346	142059	16.8447	821595	825257	887303	844718	36925	4.37128	642801	645044	645213	644353	1346.63	0.20899
P29401	Transketolase OS=Homo sapiens GN=TKT PE=1 SV=3 - [TKT_HUMAN]	ISSIQATTAAGSGHPTSCCSAAEIMAVLFFHTMR	[18] Carbamidomethyl|[19] DesthioBiotinIAM(new)|[25] Oxidation|[33] Oxidation	-0.17046	-0.500805	-0.576798	971.221	63.5167	3880.86	4	4.73839	8.09459e+06	8.09796e+06	9.5575e+06	1.79769e+07	1.92314e+07	2.00039e+07	1.38271e+07	5.80509e+06	41.9835	7.54822e+06	9.26372e+06	2.00465e+07	1.22862e+07	6.77518e+06	55.1449	4.83594e+06	5.527e+06	1.89523e+07	9.77175e+06	7.9581e+06	81.4399	6.25223e+06	8.2951e+06	1.32637e+07	9.27035e+06	3.60605e+06	38.8987
P39687	Acidic leucine-rich nuclear phosphoprotein 32 family member A OS=Homo sapiens GN=ANP32A PE=1 SV=1 - [AN32A_HUMAN]	SLDLFNCEVTNLNDYR	[7] DesthioBiotinIAM(new)	-0.232689	-0.325473	-0.573222	738.032	69.4475	2211.07	3	4.47867	1.08317e+06	1.17379e+06	1.2781e+06	1.33057e+06	1.33887e+06	1.34044e+06	1.25749e+06	106455	8.4657	1.00364e+06	1.07898e+06	1.12793e+06	1.07018e+06	62611.5	5.85054	826387	978280	1.2059e+06	1.00352e+06	191013	19.0342	795501	833211	906819	845177	56615.7	6.69868
O95081	Arf-GAP domain and FG repeat-containing protein 2 OS=Homo sapiens GN=AGFG2 PE=1 SV=2 - [AGFG2_HUMAN]	ELGGCSQAGNR	[5] DesthioBiotinIAM(new)	0.101632	-0.733326	-0.571041	694.344	41.5706	1386.67	2	4.63653	80229.3	136986	208934	222490	223750	238902	185215	62717.3	33.8618	87935.4	230219	278046	198733	98889	49.7596	5283.15	127197	201750	111410	99180.2	89.0228	66489.4	146978	160554	124674	50844.5	40.782
Q15004	PCNA-associated factor OS=Homo sapiens GN=KIAA0101 PE=1 SV=1 - [PAF15_HUMAN]	ACPLQPDHTNDEKE	[2] DesthioBiotinIAM(new)	-0.284663	-0.0493233	-0.56413	631.634	43.1212	1891.88	3	3.60831	1.53054e+06	1.55169e+06	1.59965e+06	1.64319e+06	1.6507e+06	1.73887e+06	1.61911e+06	75747.5	4.67835	1.23936e+06	1.28796e+06	1.46023e+06	1.32918e+06	116062	8.73184	1.49431e+06	1.5753e+06	1.62446e+06	1.56469e+06	65717.5	4.20004	1.05807e+06	1.1014e+06	1.12584e+06	1.0951e+06	34319	3.13386
Q8IW35	Centrosomal protein of 97 kDa OS=Homo sapiens GN=CEP97 PE=1 SV=1 - [CEP97_HUMAN]	AYRPGQHIQLVQYLATVCPLTSTLGLQTAEDAKLEK	[18] DesthioBiotinIAM(new)	-0.186558	-0.402376	-0.560018	851.266	68.4213	4251.29	5	5.28514	287540	381367	402067	402969	405806	415094	382474	47804	12.4986	252156	376236	379846	336079	72702.1	21.6324	199783	232347	436020	289384	128031	44.2425	241877	254129	282282	259429	20717	7.98561
P21333	Filamin-A OS=Homo sapiens GN=FLNA PE=1 SV=4 - [FLNA_HUMAN]	VGSAADIPINISETDLSLLTATVVPPSGREEPCLLKR	[33] DesthioBiotinIAM(new)	-0.0907986	-0.25196	-0.559893	1040.32	73.9938	4157.25	4	1.88405	998124	1.0582e+06	1.1901e+06	1.28635e+06	1.50544e+06	1.61435e+06	1.27543e+06	244648	19.1816	909243	1.30271e+06	1.38094e+06	1.19763e+06	252797	21.1081	984108	1.0637e+06	1.16534e+06	1.07105e+06	90837.3	8.48117	700128	849850	1.04559e+06	865190	173242	20.0236
Q12888	Tumor suppressor p53-binding protein 1 OS=Homo sapiens GN=TP53BP1 PE=1 SV=2 - [TP53B_HUMAN]	TVSSDGCSTPSREEGGCSLASTPATTLHLLQLSGQR	[7] DesthioBiotinIAM(new)|[17] Carbamidomethyl	0.0135285	-0.059046	-0.55879	1000.75	61.0339	3998.96	4	4.60001	2.57471e+06	2.81581e+06	2.85185e+06	3.11507e+06	3.18703e+06	3.32331e+06	2.97796e+06	278056	9.33714	2.40043e+06	3.17529e+06	3.44234e+06	3.00602e+06	541183	18.0033	2.08553e+06	3.22283e+06	3.26727e+06	2.85854e+06	669817	23.4321	1.7537e+06	1.88162e+06	2.42964e+06	2.02165e+06	359069	17.7612
P04899	Guanine nucleotide-binding protein G(i) subunit alpha-2 OS=Homo sapiens GN=GNAI2 PE=1 SV=3 - [GNAI2_HUMAN]	IIHEDGYSEEECR	[12] DesthioBiotinIAM(new)	-0.227743	-0.434513	-0.557595	625.959	43.4075	1874.86	3	4.70299	187799	198527	205989	217641	219845	223574	208896	13949	6.67749	170079	175639	189454	178391	9976.1	5.59228	139134	161717	162861	154571	13380.6	8.65662	118990	151882	154920	141931	19925.7	14.039
P62888	60S ribosomal protein L30 OS=Homo sapiens GN=RPL30 PE=1 SV=2 - [RL30_HUMAN]	VCTLAIIDPGDSDIIR	[2] DesthioBiotinIAM(new)	-0.364228	-0.473643	-0.557565	999.045	69.2471	1996.08	2	4.72301	1.31063e+06	1.31737e+06	1.33789e+06	1.48035e+06	1.51976e+06	1.59414e+06	1.42669e+06	120735	8.46263	1.0903e+06	1.11464e+06	1.12019e+06	1.10837e+06	15898.2	1.43437	850815	1.07738e+06	1.15407e+06	1.02742e+06	157678	15.3469	865154	922067	1.12086e+06	969361	134255	13.8498
Q8WXR4	Myosin-IIIb OS=Homo sapiens GN=MYO3B PE=2 SV=4 - [MYO3B_HUMAN]	RPYHVEDAEKYCLEDDLVNLEVLDEDTIIHQLQK	[12] DesthioBiotinIAM(new)	0.127885	-0.216191	-0.557069	876.64	71.0082	4378.16	5	-3.71246	1.16078e+07	1.2008e+07	1.28722e+07	1.33607e+07	1.37955e+07	1.4718e+07	1.30604e+07	1.15161e+06	8.81762	1.146e+07	1.5405e+07	1.59479e+07	1.4271e+07	2.44947e+06	17.164	1.04117e+07	1.14898e+07	1.1827e+07	1.12428e+07	739252	6.57532	8.67048e+06	8.95097e+06	9.00924e+06	8.8769e+06	181119	2.04035
P22314	Ubiquitin-like modifier-activating enzyme 1 OS=Homo sapiens GN=UBA1 PE=1 SV=3 - [UBA1_HUMAN]	RCPHPLTFDVNNPLHLDYVMAAANLFAQTYGLTGSQDR	[2] DesthioBiotinIAM(new)|[20] Oxidation	-0.265322	-0.612311	-0.555865	912.458	75.4857	4557.26	5	5.2297	2.96384e+06	3.53001e+06	3.66967e+06	4.93938e+06	5.12852e+06	5.78596e+06	4.33623e+06	1.1019e+06	25.4115	2.13276e+06	2.91248e+06	5.77815e+06	3.6078e+06	1.91959e+06	53.2066	1.37446e+06	2.30096e+06	4.83418e+06	2.83654e+06	1.79096e+06	63.1391	1.81999e+06	2.26217e+06	4.76699e+06	2.94972e+06	1.58926e+06	53.8783
Q6PJT7	Zinc finger CCCH domain-containing protein 14 OS=Homo sapiens GN=ZC3H14 PE=1 SV=1 - [ZC3HE_HUMAN]	CTKPDCPFTHVSR	[1] Carbamidomethyl|[6] DesthioBiotinIAM(new)	-0.217006	-0.71929	-0.555764	461.731	43.2378	1842.9	4	4.50647	42112.5	44108.9	45922.1	51120	56062.6	56358.3	49280.7	6146.22	12.4719	39717.6	41538.8	45939.4	42398.6	3198.77	7.54451	24926.4	26031.4	38841	29932.9	7734.37	25.839	27872	29605.8	43098.8	33525.5	8335.92	24.8644
Q6ZRV2	Protein FAM83H OS=Homo sapiens GN=FAM83H PE=1 SV=3 - [FA83H_HUMAN]	TVAGPTYYCR	[9] DesthioBiotinIAM(new)	-0.0417632	-0.422574	-0.552574	713.864	49.5941	1425.71	2	4.76398	297710	300316	311498	322966	326370	354127	318831	20796.4	6.5227	286352	317796	325054	309734	20571.9	6.64179	209244	237609	266779	237878	28768.5	12.0938	188270	225943	237927	217380	25912.4	11.9203
P07814	Bifunctional glutamate/proline--tRNA ligase OS=Homo sapiens GN=EPRS PE=1 SV=5 - [SYEP_HUMAN]	GSQFGQSCCLR	[8] Carbamidomethyl|[9] DesthioBiotinIAM(new)	-0.261108	-0.446288	-0.550146	769.868	49.0386	1537.72	2	5.03031	242802	250883	252995	255536	282489	300384	264182	22269.1	8.42948	205565	209959	245813	220446	22078.1	10.0152	191848	194685	195138	193890	1783.14	0.919661	174805	182670	183794	180423	4897.32	2.71435
Q93009	Ubiquitin carboxyl-terminal hydrolase 7 OS=Homo sapiens GN=USP7 PE=1 SV=2 - [UBP7_HUMAN]	NQGATCYMNSLLQTLFFTNQLR	[6] DesthioBiotinIAM(new)|[8] Oxidation	-0.734173	-0.452757	-0.550102	959.15	77.3845	2874.43	3	3.86118	424321	511884	590977	604366	658676	681785	578668	96051.4	16.5987	269774	309579	464268	347874	102746	29.5355	175181	320504	772718	422801	311626	73.7052	337332	417339	430972	395214	50588.9	12.8004
Q9BWJ5	Splicing factor 3B subunit 5 OS=Homo sapiens GN=SF3B5 PE=1 SV=1 - [SF3B5_HUMAN]	MLQPCGPPADKPEEN	[1] Oxidation|[5] DesthioBiotinIAM(new)	-0.423772	-0.614121	-0.548377	646.644	47.2418	1936.91	3	4.66191	241393	252147	266539	273340	279319	325000	272957	29050.3	10.6428	189938	191732	228775	203482	21922.8	10.7738	129080	138346	267565	178330	77418.5	43.413	164528	175901	219505	186645	29020.5	15.5485
P25398	40S ribosomal protein S12 OS=Homo sapiens GN=RPS12 PE=1 SV=3 - [RS12_HUMAN]	QAHLCVLASNCDEPMYVK	[5] Carbamidomethyl|[11] DesthioBiotinIAM(new)|[15] Oxidation	-0.0780914	-0.376655	-0.547825	797.385	52.5237	2389.13	3	4.44547	919187	938133	1.08499e+06	1.23978e+06	1.37164e+06	1.5352e+06	1.18149e+06	245766	20.8014	900082	1.22786e+06	1.22976e+06	1.11924e+06	189794	16.9575	712374	731965	1.28568e+06	910007	325492	35.768	571480	918101	935013	808198	205178	25.3871
P45984	Mitogen-activated protein kinase 9 OS=Homo sapiens GN=MAPK9 PE=1 SV=2 - [MK09_HUMAN]	TACTNFMMTPYVVTR	[3] DesthioBiotinIAM(new)|[7] Oxidation|[8] Oxidation	-0.82992	-0.666581	-0.547558	688.333	55.7421	2061.98	3	4.24511	551682	597669	730418	887221	918803	1.05301e+06	789800	196240	24.8468	341226	377132	614572	444310	148540	33.4316	299607	342814	850296	497572	306231	61.545	397906	518089	705094	540363	154801	28.6476
Q9BVQ7	Spermatogenesis-associated protein 5-like protein 1 OS=Homo sapiens GN=SPATA5L1 PE=1 SV=2 - [SPA5L_HUMAN]	TVKPSLSCK	[8] DesthioBiotinIAM(new)	-0.0104435	-0.490132	-0.547277	420.246	40.8002	1257.72	3	3.80447	210922	216068	218515	219182	223872	240762	221554	10318.2	4.6572	171610	238038	250218	219956	42308.8	19.2351	22886	220165	230160	157737	116891	74.1052	25397.5	214040	215397	151611	109307	72.0965
Q53GL7	Poly [ADP-ribose] polymerase 10 OS=Homo sapiens GN=PARP10 PE=1 SV=2 - [PAR10_HUMAN]	YDSAVDCICQPSIFVIFHDTQALPTHLITCEHVPR	[7] DesthioBiotinIAM(new)|[9] Carbamidomethyl|[30] Carbamidomethyl	0.230153	-0.281843	-0.545739	1095.54	71.0082	4378.14	4	1.36676	745609	784744	814439	818158	841934	896612	816916	51195.5	6.26692	453160	846234	1.57523e+06	958210	569356	59.4188	650404	670625	694809	671946	22232	3.3086	513134	538820	626907	559620	59670.7	10.6627
P47755	F-actin-capping protein subunit alpha-2 OS=Homo sapiens GN=CAPZA2 PE=1 SV=3 - [CAZA2_HUMAN]	EATDPRPCEVENAVESWR	[8] DesthioBiotinIAM(new)	-0.0481207	-0.519545	-0.544281	795.385	58.2388	2383.13	3	4.43681	477612	478238	522717	1.04956e+06	1.11338e+06	1.23453e+06	812673	355722	43.7718	491965	658718	1.20736e+06	786013	374299	47.6199	352348	386564	961829	566914	342434	60.4033	297755	329785	1.04429e+06	557277	422069	75.7378
Q15527	Surfeit locus protein 2 OS=Homo sapiens GN=SURF2 PE=1 SV=3 - [SURF2_HUMAN]	CILTGHELPCR	[1] DesthioBiotinIAM(new)|[10] Carbamidomethyl	-0.268402	-0.295524	-0.541924	532.281	51.1281	1593.82	3	5.36198	120960	124718	129152	131992	148189	152298	134551	12790.8	9.50629	104143	104467	126519	111710	12826.3	11.4818	104404	106022	118461	109629	7691.55	7.01596	80185.2	96017.7	101049	92417.2	10887.8	11.7811
P16144	Integrin beta-4 OS=Homo sapiens GN=ITGB4 PE=1 SV=5 - [ITB4_HUMAN]	CHLDTTGTYTQYR	[1] DesthioBiotinIAM(new)	-0.332707	-0.0442199	-0.540186	618.967	47.2532	1853.88	3	3.77049	110067	110250	114254	115934	124760	129223	117415	7885.43	6.71589	80280.1	95347.7	104070	93232.5	12035	12.9086	109123	112398	120090	113870	5630.14	4.94435	75127.1	76433.4	90671.2	80743.9	8622.04	10.6783
Q8IZW8	Tensin-4 OS=Homo sapiens GN=TNS4 PE=1 SV=3 - [TENS4_HUMAN]	ELGGADGASDSTDSPASCQK	[18] DesthioBiotinIAM(new)	-0.495705	-0.444208	-0.537512	731.334	45.8203	2190.98	3	4.98491	313488	327462	340898	350635	360025	384575	346180	25030.9	7.23058	238730	247332	250487	245516	6085.29	2.47857	222823	261443	279049	254438	28759.9	11.3033	221138	246746	247627	238504	15045.3	6.30821
P41134	DNA-binding protein inhibitor ID-1 OS=Homo sapiens GN=ID1 PE=1 SV=3 - [ID1_HUMAN]	CLSEQSVAISR	[1] DesthioBiotinIAM(new)	-0.304966	-0.301133	-0.536557	744.898	51.1371	1487.78	2	3.81723	388304	392578	395897	405740	416348	426423	404215	14835.6	3.67023	300174	309947	371468	327196	38650.7	11.8127	282521	336540	365140	328067	41956	12.7889	250991	291128	293896	278672	24012.3	8.6167
P0CW22	40S ribosomal protein S17-like OS=Homo sapiens GN=RPS17L PE=1 SV=1 - [RS17L_HUMAN]	VCEEIAIIPSKK	[2] DesthioBiotinIAM(new)	-0.0758367	-0.203928	-0.535366	542.651	52.5014	1624.93	3	5.02889	134466	135078	137349	141104	142322	143372	138948	3826.85	2.75416	118058	129763	147678	131833	14918.2	11.316	106461	122851	132586	120633	13202.8	10.9446	93168.1	96383.7	98064.4	95872.1	2487.92	2.59504
P52209	6-phosphogluconate dehydrogenase, decarboxylating OS=Homo sapiens GN=PGD PE=1 SV=3 - [6PGD_HUMAN]	AVSTGVQAGIPMPCFTTALSFYDGYR	[14] DesthioBiotinIAM(new)	-0.261743	-0.209319	-0.535306	1016.84	78.224	3047.5	3	4.0881	130030	130396	183166	265247	338219	345906	232160	98456.4	42.4088	130845	146656	303420	193640	95400.5	49.2668	125113	184079	293226	200806	85295.7	42.4767	79555.9	92078.7	308946	160194	128976	80.5123
Q15084	Protein disulfide-isomerase A6 OS=Homo sapiens GN=PDIA6 PE=1 SV=1 - [PDIA6_HUMAN]	TCEEHQLCVVAVLPHILDTGAAGR	[2] Carbamidomethyl|[8] DesthioBiotinIAM(new)	-0.0414046	-0.475839	-0.533537	722.128	65.8381	2884.48	4	4.49967	453803	475822	500642	516920	559669	656469	527221	72941.8	13.8352	444351	494829	597734	512305	78170.5	15.2586	313332	370606	453354	379097	70396.1	18.5694	347788	361362	383556	364235	18056.5	4.95738
Q9ULV4	Coronin-1C OS=Homo sapiens GN=CORO1C PE=1 SV=1 - [COR1C_HUMAN]	NDQCYDDIR	[4] DesthioBiotinIAM(new)	-0.111506	-0.151624	-0.532009	719.329	49.0734	1436.64	2	5.06382	371792	409316	410516	411069	438926	475065	419447	34630.7	8.25626	352972	369112	442664	388249	47810.6	12.3144	307517	377492	447796	377602	70139.3	18.575	282271	284836	303151	290086	11386.9	3.92537
Q92598	Heat shock protein 105 kDa OS=Homo sapiens GN=HSPH1 PE=1 SV=1 - [HS105_HUMAN]	IKELNNTCEPVVTQPKPK	[8] DesthioBiotinIAM(new)	-0.412866	-0.428345	-0.529064	584.329	43.7737	2333.29	4	3.188	373114	374559	376061	406627	450991	451048	405400	37464.8	9.24144	274325	305431	333768	304508	29732.4	9.76407	267285	314404	322086	301258	29671.6	9.84923	263031	280299	299502	280944	18244.4	6.49396
Q9C0C2	182 kDa tankyrase-1-binding protein OS=Homo sapiens GN=TNKS1BP1 PE=1 SV=4 - [TB182_HUMAN]	CPARPPPSGSQGLLEEMLAASSSK	[1] DesthioBiotinIAM(new)|[17] Oxidation	-0.155991	-0.334293	-0.522529	909.13	52.7373	2724.37	3	4.03097	4.9296e+06	5.52152e+06	7.41583e+06	9.01135e+06	9.46931e+06	1.0082e+07	7.73826e+06	2.14554e+06	27.7263	5.56967e+06	6.51821e+06	8.74775e+06	6.94521e+06	1.6315e+06	23.491	3.64877e+06	4.46133e+06	1.03032e+07	6.13778e+06	3.6302e+06	59.1452	4.37065e+06	4.47046e+06	7.31988e+06	5.38699e+06	1.67467e+06	31.0873
A6NNZ2	Tubulin beta-8 chain-like protein LOC260334 OS=Homo sapiens PE=1 SV=1 - [TBB8L_HUMAN]	KEAESCDCLQGFQLTHSLGGGTGSGMGTLLISK	[6] DesthioBiotinIAM(new)|[8] Carbamidomethyl|[26] Oxidation	-0.182531	-0.449858	-0.521005	924.456	60.0481	3693.79	4	3.92658	1.16771e+07	1.23929e+07	1.32587e+07	1.562e+07	1.58207e+07	1.78059e+07	1.44292e+07	2.35995e+06	16.3553	8.42112e+06	1.18162e+07	1.79059e+07	1.27144e+07	4.80574e+06	37.7976	6.48838e+06	9.22933e+06	1.59738e+07	1.05639e+07	4.88152e+06	46.2096	7.24253e+06	8.81443e+06	1.41096e+07	1.00555e+07	3.59784e+06	35.7797
P30101	Protein disulfide-isomerase A3 OS=Homo sapiens GN=PDIA3 PE=1 SV=4 - [PDIA3_HUMAN]	FIQENIFGICPHMTEDNKDLIQGK	[10] DesthioBiotinIAM(new)|[13] Oxidation	-0.295678	-0.579923	-0.520618	776.394	59.7186	3101.55	4	5.42722	5.58914e+07	6.21974e+07	6.87039e+07	7.72038e+07	8.54044e+07	9.529e+07	7.41151e+07	1.47565e+07	19.9103	4.60695e+07	5.00703e+07	8.50027e+07	6.03808e+07	2.14168e+07	35.4695	3.24986e+07	3.73988e+07	7.88516e+07	4.9583e+07	2.54655e+07	51.3593	4.05016e+07	5.30556e+07	6.14338e+07	5.16637e+07	1.05353e+07	20.392
Q9HC52	Chromobox protein homolog 8 OS=Homo sapiens GN=CBX8 PE=1 SV=3 - [CBX8_HUMAN]	RQDSDLVQCGVTSPSSAEATGK	[9] DesthioBiotinIAM(new)	-0.310383	-0.387623	-0.519789	844.753	48.0344	2531.24	3	3.94518	599543	655001	661959	678760	697559	752064	674147	50440.7	7.48215	531440	547919	551595	543651	10733.5	1.97434	460939	509932	575060	515310	57250.1	11.1098	415134	473932	521534	470200	53297.8	11.3351
Q07157	Tight junction protein ZO-1 OS=Homo sapiens GN=TJP1 PE=1 SV=3 - [ZO1_HUMAN]	CLPGDPNYLVGANCVSVLIDHF	[1] DesthioBiotinIAM(new)|[14] Carbamidomethyl	-0.218487	0.374449	-0.519343	900.454	79.7067	2698.34	3	6.07286	1.42445e+06	1.52394e+06	1.80184e+06	2.15402e+06	2.16669e+06	2.21336e+06	1.88072e+06	348946	18.5539	1.48943e+06	1.63935e+06	1.72047e+06	1.61641e+06	117214	7.2515	1.71568e+06	2.48147e+06	3.11703e+06	2.43806e+06	701681	28.7803	1.215e+06	1.22708e+06	1.4944e+06	1.31216e+06	157938	12.0365
Q92841	Probable ATP-dependent RNA helicase DDX17 OS=Homo sapiens GN=DDX17 PE=1 SV=2 - [DDX17_HUMAN]	TTSSANNPNLMYQDECDR	[11] Oxidation|[16] DesthioBiotinIAM(new)	-0.240303	-0.506911	-0.517183	791.018	47.8652	2370.03	3	4.44316	1.69231e+06	1.70863e+06	2.02485e+06	2.52554e+06	2.6974e+06	2.7505e+06	2.23321e+06	485732	21.7505	1.59298e+06	2.03855e+06	2.04015e+06	1.89056e+06	257712	13.6315	848319	1.18744e+06	2.67895e+06	1.57157e+06	973892	61.9694	1.34206e+06	1.40473e+06	1.93446e+06	1.56042e+06	325442	20.8561
P48634	Protein PRRC2A OS=Homo sapiens GN=PRRC2A PE=1 SV=3 - [PRC2A_HUMAN]	NLDSGHCVPEPSSSGQR	[7] DesthioBiotinIAM(new)	-0.239577	-0.302626	-0.516822	689.327	43.7369	2064.96	3	-2.30707	252914	252960	254441	273832	289963	295451	269927	19418.2	7.19388	206618	231918	247343	228626	20561.4	8.99346	207408	217654	231489	218850	12084.8	5.52194	174951	190605	200408	188655	12840	6.8061
Q3LXA3	Bifunctional ATP-dependent dihydroxyacetone kinase/FAD-AMP lyase (cyclizing) OS=Homo sapiens GN=DAK PE=1 SV=2 - [DHAK_HUMAN]	KLVNSVAGCADDALAGLVACNPNLQLLQGHR	[9] DesthioBiotinIAM(new)|[20] Carbamidomethyl	0.268201	-0.227801	-0.516713	879.22	67.554	3512.85	4	4.69054	380392	405011	430501	487348	585988	679860	494850	116536	23.5498	521654	592975	673224	595951	75828.8	12.724	288813	366527	612370	422570	168902	39.9701	279657	330956	427033	345882	74813.1	21.6297
P60981	Destrin OS=Homo sapiens GN=DSTN PE=1 SV=3 - [DEST_HUMAN]	KAVIFCLSADKK	[6] DesthioBiotinIAM(new)	-0.0511316	0.0609709	-0.515302	540.319	49.2779	1617.94	3	5.17105	231171	232037	257645	263211	272956	290551	257929	23256.7	9.01674	230777	249926	266139	248947	17701.3	7.11046	245834	275323	286031	269063	20817	7.73687	170355	184152	186869	180459	8854.94	4.90691
Q9Y4W2	Ribosomal biogenesis protein LAS1L OS=Homo sapiens GN=LAS1L PE=1 SV=2 - [LAS1L_HUMAN]	CLAQEVNIPDWIVDLR	[1] DesthioBiotinIAM(new)	-0.772746	-0.962421	-0.514794	727.393	77.9329	2179.16	3	4.49482	29661.6	34583.1	42937.8	54851	65249	89034.7	52719.5	22075.4	41.8732	19231.7	36269.8	37069.1	30856.9	10075.6	32.6528	9777	24233	47156.2	27055.4	18848.7	69.6672	7053.15	35799.9	67841	36898	30408.8	82.4131
Q9UJU6	Drebrin-like protein OS=Homo sapiens GN=DBNL PE=1 SV=1 - [DBNL_HUMAN]	AEEDVEPECIMEK	[9] DesthioBiotinIAM(new)|[11] Oxidation	-0.299709	-0.722389	-0.514682	917.421	50.3991	1832.83	2	5.09865	1.64286e+06	1.93748e+06	1.97805e+06	2.21888e+06	2.37909e+06	2.41881e+06	2.09586e+06	297935	14.2154	1.4145e+06	1.68503e+06	2.00861e+06	1.70271e+06	297448	17.4691	832937	983655	1.99427e+06	1.27029e+06	631500	49.7132	1.08646e+06	1.5387e+06	1.77582e+06	1.46699e+06	350228	23.8738
Q3ZCM7	Tubulin beta-8 chain OS=Homo sapiens GN=TUBB8 PE=1 SV=2 - [TBB8_HUMAN]	EAESCDCLQGFQLTHSLGGGTGSGMGTLLLSK	[5] DesthioBiotinIAM(new)|[7] Carbamidomethyl|[25] Oxidation	-0.469297	-0.344793	-0.513825	1189.57	63.9948	3565.7	3	3.83597	3.57263e+07	3.64614e+07	3.66613e+07	3.91932e+07	3.91971e+07	4.8715e+07	3.93257e+07	4.826e+06	12.2718	2.52301e+07	2.61627e+07	3.38242e+07	2.84056e+07	4.7157e+06	16.6013	2.10029e+07	2.74753e+07	4.44196e+07	3.09659e+07	1.20923e+07	39.0504	2.42308e+07	2.67427e+07	3.16534e+07	2.75423e+07	3.77532e+06	13.7074
Q9ULV4	Coronin-1C OS=Homo sapiens GN=CORO1C PE=1 SV=1 - [COR1C_HUMAN]	RGLDVNKCEIAR	[8] DesthioBiotinIAM(new)	-0.335258	-0.0945284	-0.51318	557.312	42.7668	1668.91	3	3.14215	1.22402e+06	1.285e+06	1.42556e+06	1.54987e+06	1.60236e+06	1.65353e+06	1.45672e+06	175060	12.0174	1.05288e+06	1.16719e+06	1.24391e+06	1.15466e+06	96127.8	8.32519	1.21913e+06	1.27022e+06	1.60366e+06	1.36434e+06	208826	15.3061	720580	1.16118e+06	1.18031e+06	1.02069e+06	260080	25.4808
Q9UHD8	Septin-9 OS=Homo sapiens GN=SEPT9 PE=1 SV=2 - [SEPT9_HUMAN]	SQEATEAAPSCVGDMADTPR	[11] DesthioBiotinIAM(new)|[15] Oxidation	-0.389969	-0.560384	-0.510299	783.358	48.0255	2347.05	3	4.55632	3.70352e+06	3.90172e+06	3.92048e+06	5.09038e+06	5.16415e+06	5.39657e+06	4.52947e+06	763732	16.8614	2.62467e+06	3.7997e+06	3.94557e+06	3.45665e+06	724191	20.9507	2.21211e+06	2.30549e+06	4.69699e+06	3.07153e+06	1.40847e+06	45.8555	2.95202e+06	3.21527e+06	3.37282e+06	3.18004e+06	212599	6.68543
O43402	ER membrane protein complex subunit 8 OS=Homo sapiens GN=EMC8 PE=1 SV=1 - [EMC8_HUMAN]	FTMDCVAPTIHVYEHHENR	[3] Oxidation|[5] DesthioBiotinIAM(new)	-0.779902	-0.899778	-0.508814	523.052	47.4967	2610.22	5	4.71981	67707.3	72219.5	94821.4	99351.3	121218	152499	101303	31742.5	31.3343	56678.3	60129.6	60190.1	58999.4	2010.29	3.40731	40778.5	46363.2	75743.6	54295.1	18783.6	34.5954	62652.2	64055.8	86878.7	71195.5	13600.1	19.1025
O60437	Periplakin OS=Homo sapiens GN=PPL PE=1 SV=4 - [PEPL_HUMAN]	FQEHCPDLER	[5] DesthioBiotinIAM(new)	-0.144633	-0.402009	-0.507454	523.922	45.9063	1568.74	3	1.97584	814028	824823	835713	839377	857578	892359	843980	27853.5	3.30026	750135	758670	781611	763472	16277.9	2.13209	592332	638647	685201	638727	46434.6	7.26987	512638	611328	657158	593708	73853.8	12.4394
Q9P0K7	Ankycorbin OS=Homo sapiens GN=RAI14 PE=1 SV=2 - [RAI14_HUMAN]	CPAESVDSSGK	[1] DesthioBiotinIAM(new)	-0.193494	-0.450528	-0.505085	688.332	41.1338	1374.65	2	3.99339	204427	327396	486840	524757	666214	715972	487601	195597	40.114	166312	435616	677272	426400	255605	59.9448	4968.67	474602	590873	356814	310204	86.937	169103	429236	432380	343573	151104	43.98
P14866	Heterogeneous nuclear ribonucleoprotein L OS=Homo sapiens GN=HNRNPL PE=1 SV=2 - [HNRPL_HUMAN]	VFNVFCLYGNVEK	[6] DesthioBiotinIAM(new)	-0.0225734	-0.202412	-0.501342	914.481	70.6416	1826.95	2	4.48013	718640	762325	774241	966079	969072	986377	862789	123249	14.2849	714869	884847	948467	849394	120767	14.218	594347	685814	969378	749847	195543	26.0777	600283	609329	618937	609517	9328.39	1.53046
Q9NVT9	Armadillo repeat-containing protein 1 OS=Homo sapiens GN=ARMC1 PE=1 SV=1 - [ARMC1_HUMAN]	AIVQDQGCLPGLILFMDHPNPPVVHSALLALR	[8] DesthioBiotinIAM(new)|[16] Oxidation	-0.218904	-0.275341	-0.499507	937.513	72.0625	3746.02	4	1.23561	404766	415892	568123	626846	682303	725090	570503	134870	23.6406	289735	396809	784016	490187	260035	53.0481	359705	441411	613027	471381	129293	27.4285	292656	348235	569742	403545	146590	36.3255
P13489	Ribonuclease inhibitor OS=Homo sapiens GN=RNH1 PE=1 SV=2 - [RINI_HUMAN]	VLWLADCDVSDSSCSSLAATLLANHSLR	[7] Carbamidomethyl|[14] DesthioBiotinIAM(new)	0.0921845	-0.333829	-0.497804	1100.88	73.8643	3299.62	3	-2.86499	3.27562e+07	3.69522e+07	3.79541e+07	3.93434e+07	4.29745e+07	4.35233e+07	3.89173e+07	4.01513e+06	10.3171	3.9993e+07	4.17022e+07	4.27603e+07	4.14852e+07	1.39636e+06	3.36592	2.90393e+07	2.93546e+07	3.42402e+07	3.08781e+07	2.91598e+06	9.44353	2.62026e+07	2.8152e+07	2.83272e+07	2.75606e+07	1.17935e+06	4.2791
Q08379	Golgin subfamily A member 2 OS=Homo sapiens GN=GOLGA2 PE=1 SV=3 - [GOGA2_HUMAN]	CEAPDANQQLQQAMEER	[1] DesthioBiotinIAM(new)|[14] Oxidation	-0.366844	-0.529501	-0.496705	758.351	49.1944	2272.03	3	4.46815	265372	291010	405956	468273	494559	519815	407498	107387	26.3528	297198	313859	336958	316005	19966.8	6.31851	172669	213023	461245	282312	156269	55.3531	207520	250915	407975	288803	105462	36.5168
P61970	Nuclear transport factor 2 OS=Homo sapiens GN=NUTF2 PE=1 SV=1 - [NTF2_HUMAN]	IQHSITAQDHQPTPDSCIISMVVGQLK	[17] DesthioBiotinIAM(new)|[21] Oxidation	-0.134466	-0.50613	-0.494824	815.423	61.1921	3257.66	4	2.76459	1.0968e+06	1.20262e+06	1.23006e+06	1.3153e+06	1.36523e+06	1.59941e+06	1.30157e+06	173078	13.2976	689831	895078	1.97231e+06	1.18574e+06	688879	58.0969	588460	909652	1.25123e+06	916448	331439	36.1656	726635	813280	1.23106e+06	923658	269719	29.2012
O95232	Luc7-like protein 3 OS=Homo sapiens GN=LUC7L3 PE=1 SV=2 - [LC7L3_HUMAN]	YYLCGFCPAELFTNTR	[4] DesthioBiotinIAM(new)|[7] Carbamidomethyl	-0.327551	-0.230465	-0.493872	751.029	74.5621	2250.06	3	1.7303	501109	521452	524417	544906	583789	590862	544423	36084.5	6.62802	390495	453861	457175	433844	37577.4	8.6615	336730	504131	551271	464044	112748	24.2969	329522	378170	452119	386604	61732	15.9678
Q9NTK5	Obg-like ATPase 1 OS=Homo sapiens GN=OLA1 PE=1 SV=2 - [OLA1_HUMAN]	STFFNVLTNSQASAENFPFCTIDPNESR	[20] DesthioBiotinIAM(new)	-0.426708	0.118208	-0.493415	1144.88	77.19	3431.63	3	5.98422	4.90728e+06	5.40248e+06	5.67382e+06	5.93629e+06	5.94792e+06	6.80445e+06	5.77871e+06	635223	10.9925	3.93422e+06	4.14165e+06	4.82146e+06	4.29911e+06	464103	10.7953	2.83069e+06	7.55556e+06	8.43012e+06	6.27212e+06	3.01228e+06	48.0264	3.79363e+06	3.91811e+06	4.60283e+06	4.10486e+06	435725	10.6149
Q14116	Interleukin-18 OS=Homo sapiens GN=IL18 PE=1 SV=1 - [IL18_HUMAN]	NLNDQVLFIDQGNRPLFEDMTDSDCRDNAPR	[20] Oxidation|[25] DesthioBiotinIAM(new)	-0.197876	-0.282486	-0.493134	980.967	62.0583	3919.84	4	4.48119	4.20962e+06	4.89892e+06	5.99652e+06	8.13569e+06	9.13373e+06	9.44995e+06	6.97074e+06	2.23819e+06	32.1083	4.59369e+06	4.62434e+06	9.01394e+06	6.07732e+06	2.54323e+06	41.8479	3.22244e+06	3.80338e+06	1.01676e+07	5.73115e+06	3.85307e+06	67.2303	3.73656e+06	3.99476e+06	7.12639e+06	4.95257e+06	1.88701e+06	38.1015
Q96II8	Leucine-rich repeat and calponin homology domain-containing protein 3 OS=Homo sapiens GN=LRCH3 PE=1 SV=2 - [LRCH3_HUMAN]	VSLPCDLGAALTDGVVLCHLANHVRPR	[5] DesthioBiotinIAM(new)|[18] Carbamidomethyl	0.0296492	-0.565825	-0.490902	636.748	66.8955	3178.71	5	6.13107	245491	265129	325895	333799	358502	439484	328050	69509.2	21.1886	286732	355687	362166	334862	41807.5	12.485	194482	210630	259749	221620	33993.1	15.3384	217244	221602	261455	233434	24364.6	10.4375
O00299	Chloride intracellular channel protein 1 OS=Homo sapiens GN=CLIC1 PE=1 SV=4 - [CLIC1_HUMAN]	LHIVQVVCK	[8] DesthioBiotinIAM(new)	-0.256323	-0.316255	-0.490509	445.606	50.0628	1333.8	3	4.96682	159237	162190	165591	173875	176206	188271	170895	10759.3	6.29585	131231	144462	153536	143077	11216.6	7.83959	122368	135697	153699	137255	15723.5	11.4557	118710	122797	123409	121639	2554.54	2.10011
Q12931	Heat shock protein 75 kDa, mitochondrial OS=Homo sapiens GN=TRAP1 PE=1 SV=3 - [TRAP1_HUMAN]	SDCKEFSSEAR	[3] DesthioBiotinIAM(new)	-0.0876695	-0.547686	-0.48754	518.915	41.1338	1553.72	3	5.16121	266819	274492	279359	291867	295555	298859	284492	12820.8	4.50656	199670	285426	318061	267719	61149.6	22.841	165901	195315	222661	194626	28386.2	14.585	192441	193350	222942	202911	17353.4	8.55221
P63241	Eukaryotic translation initiation factor 5A-1 OS=Homo sapiens GN=EIF5A PE=1 SV=2 - [IF5A1_HUMAN]	KYEDICPSTHNMDVPNIK	[6] DesthioBiotinIAM(new)|[12] Oxidation	-0.293667	-0.637197	-0.487359	604.799	47.4545	2415.17	4	4.44446	3.27385e+06	3.81993e+06	3.89895e+06	4.56333e+06	4.69429e+06	5.42428e+06	4.2791e+06	765570	17.8909	2.84682e+06	3.78027e+06	3.84593e+06	3.491e+06	558849	16.0082	2.03188e+06	2.11163e+06	4.11038e+06	2.7513e+06	1.17768e+06	42.8045	2.50728e+06	3.05749e+06	3.59247e+06	3.05241e+06	542610	17.7764
P08238	Heat shock protein HSP 90-beta OS=Homo sapiens GN=HSP90AB1 PE=1 SV=4 - [HS90B_HUMAN]	GFEVVYMTEPIDEYCVQQLK	[7] Oxidation|[15] DesthioBiotinIAM(new)	-0.396267	-0.283875	-0.486881	901.776	67.4114	2702.31	3	2.91569	3.58394e+06	3.91066e+06	4.53663e+06	5.62477e+06	6.25431e+06	6.85662e+06	5.12782e+06	1.32055e+06	25.7526	3.12152e+06	3.44748e+06	5.11969e+06	3.89623e+06	1.07201e+06	27.514	2.88873e+06	3.01234e+06	6.73463e+06	4.2119e+06	2.18562e+06	51.8917	3.28153e+06	3.84772e+06	3.84788e+06	3.65904e+06	326936	8.93501
O60437	Periplakin OS=Homo sapiens GN=PPL PE=1 SV=4 - [PEPL_HUMAN]	EYLNLLICEESHLK	[8] DesthioBiotinIAM(new)	-0.139658	-0.276654	-0.486682	667.359	63.5637	1999.05	3	5.08806	108941	111781	119128	122275	126870	133902	120483	9325.96	7.74049	100021	109009	119069	109366	9529.03	8.71295	96926.3	97876.5	103574	99458.9	3595.33	3.61489	74807.9	90562.7	92582.2	85984.3	9731.58	11.3179
Q9Y4P3	Transducin beta-like protein 2 OS=Homo sapiens GN=TBL2 PE=1 SV=1 - [TBL2_HUMAN]	TGRFEEAAGAAPCR	[13] DesthioBiotinIAM(new)	-0.304573	-0.19315	-0.485656	577.961	43.5466	1730.86	3	4.43085	51653.6	54336	59441.1	59485.6	61472	62623.7	58168.7	4271.96	7.34409	46228.6	47007.2	48058.6	47098.1	918.359	1.94989	40996	45683.6	65959.7	50879.8	13268.2	26.0776	40592.3	40917.9	43117.1	41542.4	1373.35	3.30591
P07437	Tubulin beta chain OS=Homo sapiens GN=TUBB PE=1 SV=2 - [TBB5_HUMAN]	MREIVHIQAGQCGNQIGAK	[12] DesthioBiotinIAM(new)	-0.359853	-0.356074	-0.485494	588.065	47.0619	2348.23	4	4.84005	6.12963e+06	6.40145e+06	7.27978e+06	2.34625e+07	2.48375e+07	2.48949e+07	1.5501e+07	9.76743e+06	63.0118	7.34437e+06	8.39584e+06	2.04969e+07	1.2079e+07	7.309e+06	60.5098	7.73992e+06	8.64242e+06	1.99498e+07	1.21107e+07	6.80381e+06	56.1801	5.60017e+06	5.70941e+06	2.19052e+07	1.10716e+07	9.38234e+06	84.7425
Q9P1F3	Costars family protein ABRACL OS=Homo sapiens GN=ABRACL PE=1 SV=1 - [ABRAL_HUMAN]	CANLFEALVGTLK	[1] DesthioBiotinIAM(new)	0.0792675	-0.0512489	-0.48477	837.97	78.4244	1673.93	2	4.63678	1.08898e+06	1.09777e+06	1.10351e+06	1.22965e+06	1.23652e+06	1.24e+06	1.16607e+06	76147.2	6.53024	983480	1.0852e+06	1.62712e+06	1.23193e+06	345997	28.0857	763616	1.2112e+06	1.40131e+06	1.12538e+06	327395	29.0921	618991	823374	1.05749e+06	833287	219420	26.3319
A6NNZ2	Tubulin beta-8 chain-like protein LOC260334 OS=Homo sapiens PE=1 SV=1 - [TBB8L_HUMAN]	EAESCDCLQGFQLTHSLGGGTGSGMGTLLISK	[5] Carbamidomethyl|[7] DesthioBiotinIAM(new)|[25] Oxidation	-0.159292	-0.33325	-0.482721	1189.57	64.2899	3565.7	3	4.64664	3.91757e+07	4.06787e+07	4.14507e+07	5.34623e+07	6.17503e+07	6.65678e+07	5.05142e+07	1.1833e+07	23.4251	3.33634e+07	3.93817e+07	6.29561e+07	4.52337e+07	1.56402e+07	34.5764	2.35322e+07	3.10519e+07	6.57024e+07	4.00955e+07	2.24927e+07	56.0977	2.87039e+07	3.46987e+07	4.50455e+07	3.61494e+07	8.26682e+06	22.8685
P07195	L-lactate dehydrogenase B chain OS=Homo sapiens GN=LDHB PE=1 SV=2 - [LDHB_HUMAN]	GMYGIENEVFLSLPCILNAR	[2] Oxidation|[15] DesthioBiotinIAM(new)	-0.18659	-0.207724	-0.482079	851.11	79.298	2550.31	3	4.45061	6.46503e+06	7.18776e+06	7.87284e+06	8.63836e+06	9.02587e+06	1.02269e+07	8.23613e+06	1.3503e+06	16.3949	4.99435e+06	6.7388e+06	9.97761e+06	7.23692e+06	2.5287e+06	34.9416	3.65569e+06	5.6628e+06	1.20766e+07	7.13168e+06	4.3984e+06	61.6741	4.83471e+06	4.91488e+06	7.94026e+06	5.89662e+06	1.7703e+06	30.0223
Q13938	Calcyphosin OS=Homo sapiens GN=CAPS PE=1 SV=1 - [CAYP1_HUMAN]	LGLVLDQAEAEGVCR	[14] DesthioBiotinIAM(new)	-0.277882	-0.407536	-0.478842	623.671	62.1947	1867.99	3	4.37043	260492	261420	321667	322252	339550	352934	309719	39530.7	12.7634	240378	257246	268746	255457	14268.4	5.58545	205687	235324	259490	233500	26947.9	11.5408	212486	225477	228757	222240	8605.44	3.87214
P07355	Annexin A2 OS=Homo sapiens GN=ANXA2 PE=1 SV=2 - [ANXA2_HUMAN]	EVKGDLENAFLNLVQCIQNKPLYFADR	[16] DesthioBiotinIAM(new)	-0.00440871	-0.31327	-0.477399	859.208	78.2449	3432.8	4	4.39208	2.01549e+06	2.27079e+06	2.35043e+06	2.46104e+06	2.85224e+06	2.85451e+06	2.46742e+06	333037	13.4974	1.97069e+06	2.4144e+06	2.99457e+06	2.45989e+06	513455	20.8731	1.39202e+06	1.97603e+06	2.5894e+06	1.98582e+06	598746	30.1511	1.45764e+06	1.7663e+06	2.09289e+06	1.77228e+06	317670	17.9244
Q5T5P2	Sickle tail protein homolog OS=Homo sapiens GN=KIAA1217 PE=1 SV=2 - [SKT_HUMAN]	CSFMDVNSNSHAEPSR	[1] DesthioBiotinIAM(new)	0.0515686	0.204881	-0.475347	692.982	49.5996	2075.92	3	3.91084	22516.4	25498.5	50623.6	58330	77970.1	83055.1	52998.9	25481.2	48.0787	46251.6	58456	60075.3	54927.6	7557.19	13.7584	32877.9	51164.8	99215.6	61086.1	34263.6	56.0907	12282.9	27662.7	74419.8	38121.8	32361.9	84.8908
Q15833	Syntaxin-binding protein 2 OS=Homo sapiens GN=STXBP2 PE=1 SV=2 - [STXB2_HUMAN]	EIHLAFLPYEAQVFSLDAPHSTYNLYCPFRAEER	[27] DesthioBiotinIAM(new)	-0.164386	-0.177971	-0.474071	865.434	72.2812	4322.13	5	2.02461	704225	880084	897123	944282	968183	1.04234e+06	906039	114353	12.6212	531288	746027	1.14808e+06	808466	313103	38.728	564927	745974	1.09176e+06	800889	267677	33.4225	523010	715366	718478	652285	111966	17.1653
Q08211	ATP-dependent RNA helicase A OS=Homo sapiens GN=DHX9 PE=1 SV=4 - [DHX9_HUMAN]	SSVNCPFSSQDMK	[5] DesthioBiotinIAM(new)|[12] Oxidation	-0.363326	-0.398017	-0.47229	871.402	50.1709	1740.79	2	4.30664	1.71714e+06	1.74209e+06	1.92891e+06	2.29603e+06	3.18157e+06	3.21211e+06	2.34631e+06	690646	29.4354	1.23867e+06	2.11052e+06	2.12266e+06	1.82395e+06	506904	27.7915	944157	1.269e+06	3.12868e+06	1.78062e+06	1.17871e+06	66.1966	1.20012e+06	1.44781e+06	2.42588e+06	1.69127e+06	648134	38.3224
P07900	Heat shock protein HSP 90-alpha OS=Homo sapiens GN=HSP90AA1 PE=1 SV=5 - [HS90A_HUMAN]	VFIMDNCEELIPEYLNFIR	[4] Oxidation|[7] DesthioBiotinIAM(new)	-0.2495	-0.0544487	-0.471134	890.787	79.2453	2669.34	3	5.56903	5.72903e+06	5.81226e+06	6.58594e+06	9.12191e+06	1.01581e+07	1.04084e+07	7.96927e+06	2.17504e+06	27.2928	3.91779e+06	5.60148e+06	1.05917e+07	6.70366e+06	3.47079e+06	51.7746	3.07568e+06	5.64817e+06	1.42985e+07	7.67411e+06	5.87929e+06	76.612	4.28048e+06	4.70577e+06	8.26078e+06	5.74901e+06	2.18563e+06	38.0175
P51580	Thiopurine S-methyltransferase OS=Homo sapiens GN=TPMT PE=1 SV=1 - [TPMT_HUMAN]	CYADTMFSLLGK	[1] DesthioBiotinIAM(new)|[6] Oxidation	-0.123689	-0.417519	-0.463403	830.912	63.5167	1659.81	2	5.59981	461141	484850	643055	711866	753588	822512	646169	146438	22.6625	477079	607019	695136	593078	109695	18.4959	327227	340233	783922	483794	260000	53.7419	412966	447003	545979	468649	69097.9	14.7441
O95372	Acyl-protein thioesterase 2 OS=Homo sapiens GN=LYPLA2 PE=1 SV=1 - [LYPA2_HUMAN]	YICPHAPR	[3] DesthioBiotinIAM(new)	-0.252321	-0.193582	-0.461228	418.227	42.9862	1251.66	3	2.86892	4.88444e+06	4.92728e+06	4.93747e+06	5.21492e+06	5.2652e+06	5.37521e+06	5.10075e+06	209263	4.10259	4.03737e+06	4.37078e+06	4.43878e+06	4.28231e+06	214830	5.01668	4.20218e+06	4.28837e+06	4.89024e+06	4.46026e+06	374860	8.40443	3.02329e+06	3.76894e+06	4.32284e+06	3.70502e+06	652127	17.6011
Q16658	Fascin OS=Homo sapiens GN=FSCN1 PE=1 SV=3 - [FSCN1_HUMAN]	YLAADKDGNVTCER	[12] DesthioBiotinIAM(new)	-0.388835	-0.345474	-0.460009	617.643	43.786	1849.91	3	3.60244	5.36528e+06	5.41326e+06	5.53631e+06	5.64373e+06	5.71638e+06	6.18022e+06	5.64253e+06	295054	5.2291	4.01985e+06	4.31553e+06	4.59301e+06	4.30946e+06	286629	6.65116	4.33969e+06	4.34104e+06	4.64212e+06	4.44095e+06	174219	3.92302	3.75979e+06	4.2281e+06	4.31816e+06	4.10202e+06	299776	7.30802
P58546	Myotrophin OS=Homo sapiens GN=MTPN PE=1 SV=2 - [MTPN_HUMAN]	TLEGGRKPLHYAADCGQLEILEFLLLK	[15] DesthioBiotinIAM(new)	0.0807234	0.121613	-0.456169	665.573	71.4582	3322.83	5	5.61489	404811	425063	456658	466157	467564	482457	450451	29427.8	6.53296	363288	421869	643965	476374	148064	31.0815	433015	496391	540801	490069	54170.5	11.0536	290559	314951	379518	328343	45966.8	13.9996
Q27J81	Inverted formin-2 OS=Homo sapiens GN=INF2 PE=1 SV=2 - [INF2_HUMAN]	KGPGKQEEVCVIDALLADIR	[10] DesthioBiotinIAM(new)	-0.0839432	-0.287778	-0.45366	613.344	68.4862	2449.35	4	4.90518	1.29406e+06	1.45293e+06	1.45696e+06	1.52153e+06	1.5956e+06	1.85959e+06	1.53011e+06	189710	12.3985	1.21514e+06	1.50493e+06	1.61079e+06	1.44362e+06	204828	14.1885	1.11884e+06	1.29117e+06	1.35022e+06	1.25341e+06	120223	9.59167	975911	1.06432e+06	1.31158e+06	1.11727e+06	173984	15.5723
A0AVT1	Ubiquitin-like modifier-activating enzyme 6 OS=Homo sapiens GN=UBA6 PE=1 SV=1 - [UBA6_HUMAN]	KPNVGCQQDSEELLK	[6] DesthioBiotinIAM(new)	-0.212164	-0.262692	-0.452856	662.013	46.8327	1983.02	3	3.91576	2.33055e+07	2.45446e+07	2.5016e+07	2.5045e+07	2.55995e+07	2.64446e+07	2.49925e+07	1.05137e+06	4.20673	2.07018e+07	2.14306e+07	2.25914e+07	2.15746e+07	952993	4.4172	1.9749e+07	2.03563e+07	2.23909e+07	2.08321e+07	1.38374e+06	6.64237	1.70065e+07	1.78658e+07	1.9906e+07	1.82594e+07	1.48931e+06	8.1564
P39687	Acidic leucine-rich nuclear phosphoprotein 32 family member A OS=Homo sapiens GN=ANP32A PE=1 SV=1 - [AN32A_HUMAN]	CPNLTHLNLSGNK	[1] DesthioBiotinIAM(new)	-0.0226347	0.0282024	-0.45218	569.642	51.5682	1705.9	3	6.09897	9.52082e+06	9.9469e+06	1.04037e+07	1.04218e+07	1.0442e+07	1.1031e+07	1.02944e+07	512198	4.97551	9.77011e+06	1.02828e+07	1.03494e+07	1.01341e+07	316992	3.12797	7.97411e+06	1.17063e+07	1.18123e+07	1.04976e+07	2.18604e+06	20.8242	7.34213e+06	7.47686e+06	7.75463e+06	7.52454e+06	210343	2.79543
Q03169	Tumor necrosis factor alpha-induced protein 2 OS=Homo sapiens GN=TNFAIP2 PE=1 SV=2 - [TNAP2_HUMAN]	LPEFSELQGCFREELMEALHLHLVK	[10] DesthioBiotinIAM(new)|[16] Oxidation	-0.270665	-0.269796	-0.450966	656.947	74.692	3279.7	5	5.46609	621400	666541	758944	776014	815672	878664	752872	94950.2	12.6117	482588	596159	793505	624084	157328	25.2095	422817	686468	764095	624460	178889	28.6471	290555	396431	965311	550766	362889	65.888
P27797	Calreticulin OS=Homo sapiens GN=CALR PE=1 SV=1 - [CALR_HUMAN]	HEQNIDCGGGYVK	[7] DesthioBiotinIAM(new)	-0.178193	-0.170931	-0.44747	572.612	43.0608	1714.81	3	2.84632	630995	639367	646703	656846	657259	681601	652129	17641.4	2.7052	538007	586565	604501	576357	34402.2	5.96891	570719	573800	593278	579266	12232.2	2.11167	469353	471375	493945	478224	13651.9	2.85471
P51812	Ribosomal protein S6 kinase alpha-3 OS=Homo sapiens GN=RPS6KA3 PE=1 SV=1 - [KS6A3_HUMAN]	AENGLLMTPCYTANFVAPEVLKR	[7] Oxidation|[10] DesthioBiotinIAM(new)	-0.0551172	-0.417714	-0.445751	950.499	65.2562	2848.48	3	5.19938	1.99744e+06	2.32184e+06	2.71747e+06	3.17224e+06	3.28815e+06	3.34165e+06	2.80646e+06	556693	19.8361	2.30955e+06	2.678e+06	3.11625e+06	2.70127e+06	403849	14.9504	1.01914e+06	1.68248e+06	3.60122e+06	2.10095e+06	1.34094e+06	63.8255	1.91851e+06	1.99143e+06	2.27159e+06	2.06051e+06	186403	9.04642
P27797	Calreticulin OS=Homo sapiens GN=CALR PE=1 SV=1 - [CALR_HUMAN]	CKDDEFTHLYTLIVRPDNTYEVK	[1] DesthioBiotinIAM(new)	-0.179653	-0.202747	-0.441599	774.647	63.501	3094.56	4	5.29431	5.8891e+06	6.39105e+06	7.24097e+06	7.98246e+06	8.26404e+06	8.4007e+06	7.36139e+06	1.03965e+06	14.1231	5.86006e+06	6.73728e+06	6.9011e+06	6.49948e+06	559780	8.61269	6.20476e+06	6.31553e+06	6.66851e+06	6.39627e+06	242189	3.78642	4.32882e+06	5.4941e+06	6.43804e+06	5.42032e+06	1.05654e+06	19.4923
Q9Y314	Nitric oxide synthase-interacting protein OS=Homo sapiens GN=NOSIP PE=1 SV=1 - [NOSIP_HUMAN]	DSLSNATPCAVLRPSGAVVTLECVEK	[9] DesthioBiotinIAM(new)|[23] Carbamidomethyl	-0.17351	-0.327688	-0.440861	1004.86	64.1114	3011.56	3	6.02832	1.7798e+06	1.98851e+06	2.01397e+06	2.1116e+06	2.13821e+06	2.15428e+06	2.03106e+06	140273	6.90641	1.56675e+06	1.63278e+06	2.20319e+06	1.80091e+06	349951	19.4319	1.42609e+06	1.59207e+06	1.83696e+06	1.61837e+06	206694	12.7717	1.44854e+06	1.5164e+06	1.52388e+06	1.49627e+06	41506.1	2.77397
P22234	Multifunctional protein ADE2 OS=Homo sapiens GN=PAICS PE=1 SV=3 - [PUR6_HUMAN]	ITSCIFQLLQEAGIK	[4] DesthioBiotinIAM(new)	0.19103	-0.422596	-0.438817	980.553	78.5018	1959.09	2	2.48849	237228	267863	268347	295287	314540	326338	284934	33287.8	11.6827	267733	290371	417718	325274	80855.5	24.8576	183641	194693	259417	212584	40933.3	19.2551	136998	246323	247299	210207	63402.5	30.162
Q58FF6	Putative heat shock protein HSP 90-beta 4 OS=Homo sapiens GN=HSP90AB4P PE=5 SV=1 - [H90B4_HUMAN]	GFEVIYMSEPIDEYCVQQLK	[7] Oxidation|[15] DesthioBiotinIAM(new)	-0.367494	-0.470129	-0.438461	1352.16	67.4114	2702.31	2	4.31973	609332	727290	1.0502e+06	1.20633e+06	1.58092e+06	1.68571e+06	1.14329e+06	437388	38.2568	473370	1.03106e+06	1.15417e+06	886199	362781	40.9368	122661	751874	1.6015e+06	825345	742151	89.9201	587000	891782	1.0522e+06	843661	236305	28.0095
Q92688	Acidic leucine-rich nuclear phosphoprotein 32 family member B OS=Homo sapiens GN=ANP32B PE=1 SV=1 - [AN32B_HUMAN]	SLDLFNCEVTNLNDYRESVFK	[7] DesthioBiotinIAM(new)	-0.0413258	-0.271593	-0.437869	934.803	70.4512	2801.39	3	6.0229	1.46503e+06	1.56283e+06	1.57253e+06	1.64842e+06	1.69488e+06	1.76863e+06	1.61872e+06	107733	6.65546	1.43581e+06	1.47947e+06	1.80376e+06	1.57301e+06	201023	12.7795	1.16252e+06	1.37341e+06	1.48694e+06	1.34096e+06	164628	12.2769	1.11098e+06	1.13606e+06	1.3379e+06	1.19498e+06	124407	10.4108
P54727	UV excision repair protein RAD23 homolog B OS=Homo sapiens GN=RAD23B PE=1 SV=1 - [RD23B_HUMAN]	ALGFPEGLVIQAYFACEK	[16] DesthioBiotinIAM(new)	-0.558767	-0.200595	-0.436536	751.402	78.024	2251.18	3	5.73277	304933	341630	388661	388998	403095	442442	378293	48328.4	12.7754	231924	260760	277765	256816	23173.6	9.02341	215893	348477	423191	329187	104986	31.8926	212813	307778	317978	279523	57997.6	20.7488
O95994	Anterior gradient protein 2 homolog OS=Homo sapiens GN=AGR2 PE=1 SV=1 - [AGR2_HUMAN]	SKTSNKPLMIIHHLDECPHSQALKK	[9] Oxidation|[17] DesthioBiotinIAM(new)	-0.487698	-0.296084	-0.435628	634.344	41.8235	3166.68	5	3.0505	520007	667851	967319	1.70826e+06	1.71242e+06	1.85614e+06	1.23867e+06	590282	47.6547	366929	1.13486e+06	1.14832e+06	883369	447301	50.6358	684316	1.11391e+06	1.22831e+06	1.00884e+06	286811	28.4297	518105	558861	1.67054e+06	915835	653909	71.4004
Q9NPH2	Inositol-3-phosphate synthase 1 OS=Homo sapiens GN=ISYNA1 PE=1 SV=1 - [INO1_HUMAN]	KGPVPAATNGCTGDANGHLQEEPPMPTT	[11] DesthioBiotinIAM(new)|[25] Oxidation	-0.429784	-0.343242	-0.434742	1034.83	47.4142	3101.47	3	4.06956	2.37474e+06	2.60275e+06	2.7969e+06	3.34649e+06	3.84376e+06	3.99295e+06	3.1596e+06	671583	21.2553	2.08516e+06	2.46096e+06	2.49069e+06	2.3456e+06	226039	9.63674	1.54377e+06	1.76215e+06	4.16591e+06	2.49061e+06	1.45496e+06	58.4177	1.81657e+06	2.03919e+06	3.1569e+06	2.33755e+06	718253	30.7267
Q9UGI8	Testin OS=Homo sapiens GN=TES PE=1 SV=1 - [TES_HUMAN]	NHAVVCQGCHNAIDPEVQR	[6] DesthioBiotinIAM(new)|[9] Carbamidomethyl	-0.205005	-0.372453	-0.434665	815.064	42.7206	2442.17	3	1.75027	1.22935e+06	1.34916e+06	1.37689e+06	1.45044e+06	1.53619e+06	1.56513e+06	1.41786e+06	125448	8.84773	1.20454e+06	1.22785e+06	1.25774e+06	1.23004e+06	26664.9	2.1678	1.00116e+06	1.09465e+06	1.18994e+06	1.09525e+06	94394	8.61848	818441	1.15852e+06	1.17011e+06	1.04903e+06	199776	19.044
Q9NUQ3	Gamma-taxilin OS=Homo sapiens GN=TXLNG PE=1 SV=2 - [TXLNG_HUMAN]	DLATPVMQPCTALDSHKELNTSSK	[7] Oxidation|[10] DesthioBiotinIAM(new)	-0.0960488	-0.475556	-0.433984	725.368	51.2502	2897.44	4	5.63407	794349	807593	981798	1.07427e+06	1.08462e+06	1.12809e+06	978452	145561	14.8767	707199	1.00301e+06	1.03609e+06	915432	181091	19.7821	558266	586646	966165	703692	227751	32.3651	590442	767731	814622	724265	118242	16.3258
P07737	Profilin-1 OS=Homo sapiens GN=PFN1 PE=1 SV=2 - [PROF1_HUMAN]	CYEMASHLR	[1] DesthioBiotinIAM(new)|[4] Oxidation	-0.169436	-0.28106	-0.433528	474.562	40.8273	1420.66	3	4.06754	3.29275e+06	3.31788e+06	4.11583e+06	4.32384e+06	4.83619e+06	5.02244e+06	4.15149e+06	733579	17.6703	3.20065e+06	3.88859e+06	3.98515e+06	3.69146e+06	427787	11.5885	2.82194e+06	3.59184e+06	3.83608e+06	3.41662e+06	529288	15.4916	2.08344e+06	3.18787e+06	3.95059e+06	3.07396e+06	938775	30.5395
Q86W42	THO complex subunit 6 homolog OS=Homo sapiens GN=THOC6 PE=1 SV=1 - [THOC6_HUMAN]	LHMTIFSQSVSPCGK	[3] Oxidation|[13] DesthioBiotinIAM(new)	-0.32461	-0.558538	-0.432845	649.669	50.9677	1945.99	3	5.71794	1.59661e+06	1.72199e+06	1.86713e+06	2.64435e+06	2.67e+06	3.00962e+06	2.25162e+06	593505	26.3591	1.3275e+06	1.37405e+06	2.69229e+06	1.79795e+06	774874	43.0977	977504	982686	2.62628e+06	1.52882e+06	950430	62.1674	1.32964e+06	1.39952e+06	2.27483e+06	1.668e+06	526690	31.5763
Q7KZF4	Staphylococcal nuclease domain-containing protein 1 OS=Homo sapiens GN=SND1 PE=1 SV=1 - [SND1_HUMAN]	DIQNTQCLLNVEHLSAGCPHVTLQFADSK	[7] Carbamidomethyl|[18] DesthioBiotinIAM(new)	-0.159152	-0.20311	-0.431994	884.447	64.5645	3533.76	4	5.79346	483572	493340	572804	596968	599338	620210	561039	58278	10.3875	465690	482749	558878	502439	49616	9.87504	445248	490981	525854	487361	40424.7	8.29462	384824	414973	447790	415862	31492.6	7.57284
Q86Y37	CDK2-associated and cullin domain-containing protein 1 OS=Homo sapiens GN=CACUL1 PE=1 SV=1 - [CACL1_HUMAN]	AGDELAYNSSSACASSR	[13] DesthioBiotinIAM(new)	-0.1641	-0.42269	-0.43108	662.309	48.3797	1983.91	3	5.37569	92294	95409.9	101937	107083	110870	111192	103131	7987.31	7.74481	89253.1	92041.5	94834.6	92043.1	2790.73	3.03198	59010.4	81431.1	90376.1	76939.2	16158.1	21.0012	72974.2	73279.8	83225.2	76493.1	5832.19	7.62447
P30084	Enoyl-CoA hydratase, mitochondrial OS=Homo sapiens GN=ECHS1 PE=1 SV=4 - [ECHM_HUMAN]	ALNALCDGLIDELNQALK	[6] DesthioBiotinIAM(new)	-0.248445	-0.236649	-0.429704	737.405	77.4717	2209.19	3	6.71573	3.88222e+06	3.92806e+06	3.99955e+06	4.48762e+06	4.71825e+06	4.97226e+06	4.33133e+06	460288	10.627	3.36187e+06	3.59743e+06	3.97907e+06	3.64612e+06	311472	8.54254	2.56964e+06	4.11637e+06	4.34216e+06	3.67606e+06	964813	26.2458	2.39165e+06	3.58782e+06	3.66745e+06	3.21564e+06	714707	22.226
P63000	Ras-related C3 botulinum toxin substrate 1 OS=Homo sapiens GN=RAC1 PE=1 SV=1 - [RAC1_HUMAN]	HHCPNTPIILVGTK	[3] DesthioBiotinIAM(new)	-0.0442024	-0.0150829	-0.429504	609.345	49.404	1825.01	3	5.55434	338006	369935	384990	389939	391894	404133	379816	23290.1	6.13195	352038	362202	390826	368355	20113.1	5.46024	356584	382084	388929	375866	17045.5	4.535	267735	288268	290057	282020	12403.6	4.39814
Q13263	Transcription intermediary factor 1-beta OS=Homo sapiens GN=TRIM28 PE=1 SV=5 - [TIF1B_HUMAN]	VLLALFCHEPCRPLHQLATDSTFSLDQPGGTLDLTLIR	[7] Carbamidomethyl|[11] DesthioBiotinIAM(new)	0.156083	-0.218701	-0.428007	909.687	71.2045	4543.4	5	5.47366	9.69846e+06	1.01659e+07	1.02796e+07	1.26026e+07	1.26702e+07	1.30587e+07	1.14126e+07	1.51549e+06	13.2791	7.76089e+06	1.41435e+07	1.62453e+07	1.27165e+07	4.41852e+06	34.7462	9.0716e+06	1.01138e+07	1.02364e+07	9.80727e+06	640048	6.52626	8.03554e+06	8.22732e+06	9.18563e+06	8.48283e+06	616151	7.26351
P46109	Crk-like protein OS=Homo sapiens GN=CRKL PE=1 SV=1 - [CRKL_HUMAN]	VPCAYDK	[3] DesthioBiotinIAM(new)	-0.0967256	-0.442725	-0.426634	546.284	43.7616	1090.55	2	4.88844	2.39085e+06	2.5833e+06	2.63207e+06	2.71365e+06	2.99502e+06	3.00067e+06	2.71926e+06	240501	8.84437	2.39203e+06	2.45718e+06	2.77957e+06	2.54293e+06	207510	8.16029	953033	2.39699e+06	2.65202e+06	2.00068e+06	916205	45.7947	1.90835e+06	1.98586e+06	2.17514e+06	2.02312e+06	137241	6.78362
Q9Y570	Protein phosphatase methylesterase 1 OS=Homo sapiens GN=PPME1 PE=1 SV=3 - [PPME1_HUMAN]	GLSNLFLSCPIPK	[9] DesthioBiotinIAM(new)	-0.135171	-0.340876	-0.426361	842.981	68.5018	1683.95	2	5.46357	1.28558e+06	1.3741e+06	1.40556e+06	1.44989e+06	1.52107e+06	1.58521e+06	1.4369e+06	106839	7.43541	1.22911e+06	1.31718e+06	1.37887e+06	1.30839e+06	75268.6	5.75278	865006	1.16645e+06	1.37211e+06	1.13452e+06	255055	22.4813	1.02681e+06	1.0297e+06	1.15124e+06	1.06925e+06	71017	6.64176
Q9GZY0	Nuclear RNA export factor 2 OS=Homo sapiens GN=NXF2 PE=1 SV=1 - [NXF2_HUMAN]	ELSAPVIVDIDSSETMKPCK	[16] Oxidation|[19] DesthioBiotinIAM(new)	-0.496499	-0.779493	-0.426106	825.426	58.3704	2473.26	3	4.57237	671289	864389	934884	1.02631e+06	1.03143e+06	1.06585e+06	932359	147815	15.8538	529179	646810	806650	660880	139269	21.0734	370733	387030	871735	543166	284666	52.4087	589339	644561	847876	693925	136155	19.6209
Q15833	Syntaxin-binding protein 2 OS=Homo sapiens GN=STXBP2 PE=1 SV=2 - [STXB2_HUMAN]	EIHLAFLPYEAQVFSLDAPHSTYNLYCPFR	[27] DesthioBiotinIAM(new)	-0.143158	-0.398804	-0.425555	960.238	75.7857	3836.92	4	5.38275	3.59626e+06	3.7159e+06	4.00091e+06	4.33081e+06	4.53112e+06	4.54878e+06	4.12063e+06	412091	10.0007	3.22001e+06	3.77125e+06	4.20286e+06	3.73137e+06	492635	13.2025	2.35934e+06	3.09365e+06	3.92334e+06	3.12544e+06	782485	25.036	2.64454e+06	3.02796e+06	3.53157e+06	3.06802e+06	444872	14.5003
O14579	Coatomer subunit epsilon OS=Homo sapiens GN=COPE PE=1 SV=3 - [COPE_HUMAN]	ALHQGDSLECTAMTVQILLK	[10] DesthioBiotinIAM(new)|[13] Oxidation	-0.207666	-0.258239	-0.425229	828.441	64.4032	2482.3	3	4.01415	484380	490015	571104	594807	677906	750560	594795	104787	17.6173	367405	395409	782351	515055	231908	45.0259	374630	469217	648092	497313	138879	27.9258	295664	458781	574424	442956	140052	31.6176
Q9Y617	Phosphoserine aminotransferase OS=Homo sapiens GN=PSAT1 PE=1 SV=2 - [SERC_HUMAN]	VIFLQGGGCGQFSAVPLNLIGLK	[9] DesthioBiotinIAM(new)	-0.311014	-0.229493	-0.425008	876.499	78.5907	2626.48	3	3.33865	452479	453315	466392	478096	509907	551831	485337	38836.8	8.00204	346165	356598	470891	391218	69195.7	17.6873	346347	446773	448761	413960	58563.1	14.147	312843	347403	424240	361496	57020	15.7733
Q68DK7	Male-specific lethal 1 homolog OS=Homo sapiens GN=MSL1 PE=1 SV=3 - [MSL1_HUMAN]	KSPLGGGGGSGASSQAACLK	[18] DesthioBiotinIAM(new)	-0.156433	0.0613982	-0.424526	677.024	43.7189	2028.05	3	4.36998	87105	90468.1	96742.5	105513	117959	121697	103247	14339.8	13.8888	77532.2	97780.7	102600	92637.7	13301.9	14.359	92712	105267	125230	107736	16399	15.2215	73944.4	76245.2	80594.1	76927.9	3376.99	4.38982
Q7Z6Z7	E3 ubiquitin-protein ligase HUWE1 OS=Homo sapiens GN=HUWE1 PE=1 SV=3 - [HUWE1_HUMAN]	HASGGSTVHIHPQAAPVVCR	[19] DesthioBiotinIAM(new)	-0.0726711	0.277777	-0.424516	580.808	41.1937	2319.2	4	0.597377	265210	266855	287784	303654	309436	364490	299572	36656.5	12.2363	240824	277451	336292	284855	48162.9	16.9079	308286	368595	412654	363178	52394.1	14.4266	173567	225033	271021	223207	48752.7	21.8419
P32929	Cystathionine gamma-lyase OS=Homo sapiens GN=CTH PE=1 SV=3 - [CGL_HUMAN]	YMNGHSDVVMGLVSVNCESLHNR	[2] Oxidation|[10] Oxidation|[17] DesthioBiotinIAM(new)	-0.297058	-0.515735	-0.420585	723.095	52.5237	2888.35	4	4.29102	2.13814e+06	2.76295e+06	3.18197e+06	5.24061e+06	5.47395e+06	6.19647e+06	4.16568e+06	1.67555e+06	40.2228	2.01475e+06	3.27418e+06	4.88254e+06	3.39049e+06	1.43743e+06	42.3959	1.61917e+06	1.75654e+06	5.36519e+06	2.91363e+06	2.12422e+06	72.9063	1.9342e+06	2.28462e+06	5.11799e+06	3.11227e+06	1.74582e+06	56.0946
Q13501	Sequestosome-1 OS=Homo sapiens GN=SQSTM1 PE=1 SV=1 - [SQSTM_HUMAN]	NMVHPNVICDGCNGPVVGTR	[2] Oxidation|[9] Carbamidomethyl|[12] DesthioBiotinIAM(new)	-0.0918864	-0.538479	-0.419914	817.732	49.7489	2450.17	3	4.58153	578056	683005	743993	858805	903788	922047	781615	136515	17.4657	658330	757932	783897	733386	66284.5	9.03815	364048	424951	825419	538139	250648	46.5768	504437	519618	728646	584233	125295	21.446
Q13813	Spectrin alpha chain, non-erythrocytic 1 OS=Homo sapiens GN=SPTAN1 PE=1 SV=3 - [SPTN1_HUMAN]	VNDVCTNGQDLIKK	[5] DesthioBiotinIAM(new)	-0.230291	-0.0654191	-0.419621	614.998	47.2099	1841.97	3	3.24406	504654	520135	537013	550269	566629	580052	543125	28330	5.21611	399150	428698	561134	462994	86265.9	18.6322	391749	579096	586297	519047	110303	21.251	396382	405838	415936	406052	9778.84	2.40827
O76080	AN1-type zinc finger protein 5 OS=Homo sapiens GN=ZFAND5 PE=1 SV=1 - [ZFAN5_HUMAN]	ADTSLNNCEGAAGSTSEK	[8] DesthioBiotinIAM(new)	-0.282791	-0.448352	-0.419527	684.319	43.9556	2049.94	3	4.23632	670715	745218	747623	750020	795560	796185	750887	45866.6	6.10833	549387	644771	657528	617228	59097.7	9.57469	487190	579831	583908	550309	54701.1	9.94006	517071	541989	625185	561415	56614.7	10.0843
P07900	Heat shock protein HSP 90-alpha OS=Homo sapiens GN=HSP90AA1 PE=1 SV=5 - [HS90A_HUMAN]	RVFIMDNCEELIPEYLNFIR	[8] DesthioBiotinIAM(new)	-0.114551	-0.0888922	-0.41895	937.484	75.5728	2809.43	3	0.416016	6.21893e+06	6.67384e+06	7.26349e+06	7.64949e+06	7.79262e+06	8.77589e+06	7.39571e+06	900024	12.1695	6.12879e+06	6.561e+06	7.80379e+06	6.83119e+06	869575	12.7295	6.24583e+06	6.63663e+06	7.97886e+06	6.95378e+06	909004	13.0721	4.70114e+06	5.64137e+06	6.25278e+06	5.53176e+06	781608	14.1295
O95372	Acyl-protein thioesterase 2 OS=Homo sapiens GN=LYPLA2 PE=1 SV=1 - [LYPA2_HUMAN]	TYPGVMHSSCPQEMAAVK	[6] Oxidation|[10] DesthioBiotinIAM(new)|[14] Oxidation	-0.226481	-0.641269	-0.418653	755.358	43.0608	2263.05	3	3.59402	2.48947e+07	2.62567e+07	2.96546e+07	4.72754e+07	5.53648e+07	5.55993e+07	3.98409e+07	1.45346e+07	36.4815	1.59693e+07	3.46466e+07	5.15422e+07	3.40527e+07	1.77939e+07	52.2538	1.19789e+07	1.47494e+07	4.99036e+07	2.5544e+07	2.11415e+07	82.7651	2.2018e+07	2.21637e+07	4.52361e+07	2.98059e+07	1.33631e+07	44.8338
P63241	Eukaryotic translation initiation factor 5A-1 OS=Homo sapiens GN=EIF5A PE=1 SV=2 - [IF5A1_HUMAN]	YEDICPSTHNMDVPNIKR	[5] DesthioBiotinIAM(new)|[11] Oxidation	-0.116561	-0.643311	-0.418105	611.8	46.9721	2443.17	4	4.24366	534893	579624	665725	669525	712119	755292	652863	82130.1	12.58	547513	593791	665266	602190	59323.9	9.85135	324387	344204	585380	417990	145302	34.7621	436941	510840	518040	488607	44888.5	9.18702
Q49AR2	UPF0489 protein C5orf22 OS=Homo sapiens GN=C5orf22 PE=1 SV=2 - [CE022_HUMAN]	LCNNQEENDAVSSAK	[2] DesthioBiotinIAM(new)	-0.437665	-0.191682	-0.417934	959.455	42.9458	1916.9	2	3.07458	406223	406361	417276	471602	483029	484234	444788	38621.7	8.68319	316182	323426	345590	328399	15321.6	4.66554	377624	394692	396031	389449	10262.2	2.63505	320304	332998	345463	332922	12579.6	3.77855
Q9NX24	H/ACA ribonucleoprotein complex subunit 2 OS=Homo sapiens GN=NHP2 PE=1 SV=1 - [NHP2_HUMAN]	ADPDGPEAQAEACSGER	[13] DesthioBiotinIAM(new)	-0.427803	0.0711042	-0.415821	666.969	46.1889	1997.88	3	4.5453	436519	528352	690028	777222	850935	858621	690279	174541	25.2856	467447	484961	587039	513149	64586.7	12.5863	492363	643853	1.03924e+06	725153	282359	38.9379	299459	505294	747533	517428	224283	43.3458
Q15154	Pericentriolar material 1 protein OS=Homo sapiens GN=PCM1 PE=1 SV=4 - [PCM1_HUMAN]	NNCPFSADENYRPLAK	[3] DesthioBiotinIAM(new)	-0.0570594	-0.0616502	-0.415395	712.353	52.6601	2134.04	3	4.69739	345588	361197	364159	365106	426845	478111	390167	51401.2	13.1741	327447	368203	429462	375037	51349.6	13.6919	283248	410173	428116	373846	78971.3	21.124	251638	310736	315285	292553	35506.4	12.1367
O94776	Metastasis-associated protein MTA2 OS=Homo sapiens GN=MTA2 PE=1 SV=1 - [MTA2_HUMAN]	ALDCSSSIR	[4] DesthioBiotinIAM(new)	0.071052	-0.0473614	-0.414755	624.325	47.0619	1246.64	2	1.78834	292159	317874	324412	326202	327489	344499	322106	17130.5	5.31828	288097	361990	365013	338367	43561.2	12.874	291217	299295	344597	311703	28771.9	9.23054	208969	255402	260509	241627	28397.8	11.7528
P13010	X-ray repair cross-complementing protein 5 OS=Homo sapiens GN=XRCC5 PE=1 SV=3 - [XRCC5_HUMAN]	KCDISLQFFLPFSLGK	[2] DesthioBiotinIAM(new)	-0.0751152	-0.226362	-0.414433	713.731	76.7677	2138.17	3	5.83765	523259	528566	532896	556270	581451	593213	552609	29400.7	5.32035	409608	544882	619230	524573	106276	20.2596	297976	531370	587743	472363	153631	32.524	364332	431191	448368	414631	44398.5	10.708
Q5SRE5	Nucleoporin NUP188 homolog OS=Homo sapiens GN=NUP188 PE=1 SV=1 - [NU188_HUMAN]	VISTDLSIADCLLPITSR	[11] DesthioBiotinIAM(new)	-0.464759	-0.239752	-0.414167	738.414	74.6569	2212.22	3	2.38731	67807.9	68086.4	92009.6	97855	103115	110295	89861.6	18012.4	20.0446	51429	62443.6	81466.4	65113	15195.6	23.3372	32214.6	80483.3	115611	76103	41870.4	55.0182	49809.7	62476	90024.9	67436.9	20561.4	30.4899
P08238	Heat shock protein HSP 90-beta OS=Homo sapiens GN=HSP90AB1 PE=1 SV=4 - [HS90B_HUMAN]	KRGFEVVYMTEPIDEYCVQQLK	[9] Oxidation|[17] DesthioBiotinIAM(new)	-0.398524	-0.646905	-0.413635	747.634	57.7941	2986.51	4	4.50914	875887	1.03912e+06	1.19053e+06	1.54639e+06	1.65964e+06	1.70556e+06	1.33619e+06	348306	26.0672	735671	964000	1.34136e+06	1.01368e+06	305885	30.1758	508063	575884	1.47612e+06	853355	540393	63.3257	860654	943255	1.20544e+06	1.00312e+06	180017	17.9458
Q9NQS7	Inner centromere protein OS=Homo sapiens GN=INCENP PE=1 SV=3 - [INCE_HUMAN]	IICHSYLER	[3] DesthioBiotinIAM(new)	-0.062344	-0.405933	-0.413284	477.261	46.5192	1428.76	3	4.68414	132020	140276	145786	147165	148549	149146	143824	6596.44	4.58648	134195	134393	144635	137741	5971.35	4.3352	99399.8	104530	121722	108551	11691.8	10.7708	100996	106638	116363	107999	7773.52	7.19777
P30044	Peroxiredoxin-5, mitochondrial OS=Homo sapiens GN=PRDX5 PE=1 SV=4 - [PRDX5_HUMAN]	GVLFGVPGAFTPGCSK	[14] DesthioBiotinIAM(new)	-0.173578	-0.46035	-0.41138	916.995	67.8224	1831.97	2	5.14095	3.22596e+06	3.35681e+06	3.75706e+06	4.41244e+06	4.55464e+06	4.83277e+06	4.02328e+06	669303	16.6358	3.18854e+06	3.56466e+06	3.94842e+06	3.56721e+06	379943	10.651	2.38891e+06	2.85195e+06	3.53161e+06	2.92416e+06	574759	19.6555	2.74748e+06	3.15227e+06	3.1756e+06	3.02512e+06	240723	7.95746
Q9UGI8	Testin OS=Homo sapiens GN=TES PE=1 SV=1 - [TES_HUMAN]	CGQEEHDVLLSNEEDRK	[1] DesthioBiotinIAM(new)	-0.150118	-0.215552	-0.411275	575.028	43.8916	2296.08	4	3.6942	1.1326e+06	1.19737e+06	1.42776e+06	1.47357e+06	1.48746e+06	1.5132e+06	1.37199e+06	164012	11.9543	1.13275e+06	1.21452e+06	1.36196e+06	1.23641e+06	116163	9.39519	1.16749e+06	1.1754e+06	1.20186e+06	1.18158e+06	17997.4	1.52316	994960	995847	1.10424e+06	1.03168e+06	62835.5	6.0906
P38936	Cyclin-dependent kinase inhibitor 1 OS=Homo sapiens GN=CDKN1A PE=1 SV=3 - [CDN1A_HUMAN]	RPGTSPALLQGTAEEDHVDLSLSCTLVPR	[24] DesthioBiotinIAM(new)	-0.175786	-0.296758	-0.409667	840.444	62.0269	3357.75	4	3.53199	345683	409444	427269	458750	468454	469569	429862	47770.7	11.1131	331278	366362	444010	380550	57689.9	15.1596	284732	379603	385490	349942	56549.9	16.1598	299547	328053	343196	323599	22163.1	6.84893
O94855	Protein transport protein Sec24D OS=Homo sapiens GN=SEC24D PE=1 SV=2 - [SC24D_HUMAN]	AYMCPFMQFIEGGRR	[3] Oxidation|[4] DesthioBiotinIAM(new)|[7] Oxidation	-0.426298	-0.547193	-0.409647	712.009	60.6708	2133.01	3	4.64827	785684	998476	1.11285e+06	1.66261e+06	1.87125e+06	1.90537e+06	1.38937e+06	483078	34.7695	686804	818478	1.5965e+06	1.03393e+06	491632	47.5499	591502	592148	1.6688e+06	950818	621793	65.3957	807591	817302	1.5129e+06	1.04593e+06	404435	38.6675
P55010	Eukaryotic translation initiation factor 5 OS=Homo sapiens GN=EIF5 PE=1 SV=2 - [IF5_HUMAN]	FVLCPECENPETDLHVNPK	[4] DesthioBiotinIAM(new)|[7] Carbamidomethyl	-0.169243	-0.584036	-0.408619	846.413	58.1387	2536.22	3	3.05105	778825	849706	882397	906930	991888	1.0583e+06	911340	100300	11.0057	718907	823212	889270	810463	85894	10.5981	517728	576859	729265	607951	109142	17.9524	667942	689760	701957	686553	17233.1	2.51009
Q9Y277	Voltage-dependent anion-selective channel protein 3 OS=Homo sapiens GN=VDAC3 PE=1 SV=1 - [VDAC3_HUMAN]	SCSGVEFSTSGHAYTDTGK	[2] DesthioBiotinIAM(new)	-0.226218	-0.434837	-0.408507	744.01	48.3051	2229.01	3	3.39079	1.31061e+07	1.31848e+07	1.38474e+07	1.42775e+07	1.54718e+07	1.55114e+07	1.42332e+07	1.0666e+06	7.49377	1.10532e+07	1.23273e+07	1.31222e+07	1.21676e+07	1.04373e+06	8.57801	1.0184e+07	1.06616e+07	1.07426e+07	1.05294e+07	301874	2.86697	1.01344e+07	1.04784e+07	1.15571e+07	1.07233e+07	742297	6.92227
P55036	26S proteasome non-ATPase regulatory subunit 4 OS=Homo sapiens GN=PSMD4 PE=1 SV=1 - [PSMD4_HUMAN]	LQAQQDAVNIVCHSK	[12] DesthioBiotinIAM(new)	-0.0956301	-0.0554472	-0.408013	650.682	50.2201	1949.03	3	5.19099	214727	244619	247792	253872	261762	272378	249192	19637.9	7.88066	232361	232961	234306	233209	996.048	0.427105	186470	257677	275242	239796	47009.9	19.6041	181380	190747	191290	187806	5571.25	2.96649
P13796	Plastin-2 OS=Homo sapiens GN=LCP1 PE=1 SV=6 - [PLSL_HUMAN]	AECMLQQAER	[3] DesthioBiotinIAM(new)|[4] Oxidation	-0.0790099	-0.720699	-0.407886	745.861	44.1915	1489.71	2	4.23954	523497	572029	642000	662347	819219	822397	673581	124353	18.4614	476062	693235	743756	637684	142230	22.3042	229011	326326	670857	408732	232163	56.8009	392961	444552	685577	507696	156194	30.7652
Q86VP6	Cullin-associated NEDD8-dissociated protein 1 OS=Homo sapiens GN=CAND1 PE=1 SV=2 - [CAND1_HUMAN]	QGGLLVNFHPSILTCLLPQLTSPR	[15] DesthioBiotinIAM(new)	-0.348652	0.0209433	-0.406411	967.549	77.7308	2899.62	3	4.84442	428705	467063	468452	550973	584129	584346	513945	67507.9	13.1353	343746	412314	454769	403610	56020.9	13.88	501284	520013	543082	521460	20936.1	4.01491	367073	392825	403413	387770	18689.7	4.81979
Q8WWI1	LIM domain only protein 7 OS=Homo sapiens GN=LMO7 PE=1 SV=3 - [LMO7_HUMAN]	GAAMIIESLGLCYHLHCFK	[4] Oxidation|[12] DesthioBiotinIAM(new)|[17] Carbamidomethyl	-0.187002	0.278585	-0.405715	619.567	64.7259	2474.24	4	5.27595	115388	148163	154601	174909	209812	213899	169462	38028.9	22.4409	74739.4	107475	264367	148860	101362	68.0918	174646	215789	226240	205558	27276.2	13.2693	67578.9	106700	209482	127920	73293.1	57.2958
P04075	Fructose-bisphosphate aldolase A OS=Homo sapiens GN=ALDOA PE=1 SV=2 - [ALDOA_HUMAN]	CQYVTEK	[1] DesthioBiotinIAM(new)	0.0312071	-0.754176	-0.401588	583.8	43.197	1165.59	2	4.75335	1.53212e+06	1.53391e+06	1.54584e+06	1.59243e+06	1.85616e+06	1.98242e+06	1.67381e+06	195519	11.681	1.482e+06	1.80811e+06	1.84114e+06	1.71042e+06	198502	11.6055	501077	1.19811e+06	1.27795e+06	992379	427348	43.063	1.13297e+06	1.30553e+06	1.36286e+06	1.26712e+06	119665	9.44384
O95071	E3 ubiquitin-protein ligase UBR5 OS=Homo sapiens GN=UBR5 PE=1 SV=2 - [UBR5_HUMAN]	VPDCFQR	[4] DesthioBiotinIAM(new)	-0.0801365	-0.46838	-0.400324	580.8	49.2249	1159.59	2	4.01825	695484	709644	729500	752119	799813	807933	749082	46600.1	6.22096	687649	691747	746427	708608	32816.6	4.63114	513790	548353	562111	541418	24895.8	4.59826	516516	578913	607283	567571	46434.5	8.18127
P30101	Protein disulfide-isomerase A3 OS=Homo sapiens GN=PDIA3 PE=1 SV=4 - [PDIA3_HUMAN]	KFIQENIFGICPHMTEDNKDLIQGK	[11] DesthioBiotinIAM(new)|[14] Oxidation	-0.726437	-0.513167	-0.40026	646.935	56.0748	3229.64	5	4.04904	3.60636e+06	3.71286e+06	3.9609e+06	4.08212e+06	4.60621e+06	5.02105e+06	4.16492e+06	546355	13.118	2.03401e+06	2.51932e+06	2.99843e+06	2.51725e+06	482215	19.1564	2.18845e+06	2.30265e+06	4.26375e+06	2.91829e+06	1.16661e+06	39.9758	2.60383e+06	3.32672e+06	3.53698e+06	3.15585e+06	489482	15.5103
O95817	BAG family molecular chaperone regulator 3 OS=Homo sapiens GN=BAG3 PE=1 SV=3 - [BAG3_HUMAN]	GMPETTQPDKQCGQVAAAAAAQPPASHGPER	[2] Oxidation|[12] DesthioBiotinIAM(new)	-0.517403	-0.491428	-0.400186	854.167	43.2953	3412.64	4	3.79238	3.05693e+06	3.14905e+06	3.44224e+06	3.5864e+06	4.45001e+06	4.99604e+06	3.78011e+06	774619	20.492	2.40802e+06	2.68929e+06	2.82537e+06	2.64089e+06	212840	8.05939	1.92071e+06	2.63392e+06	3.51199e+06	2.68887e+06	797060	29.6429	2.47717e+06	2.71508e+06	3.401e+06	2.86442e+06	479678	16.7461
O00762	Ubiquitin-conjugating enzyme E2 C OS=Homo sapiens GN=UBE2C PE=1 SV=1 - [UBE2C_HUMAN]	FLTPCYHPNVDTQGNICLDILKEK	[5] DesthioBiotinIAM(new)|[17] Carbamidomethyl	-0.0357874	-0.327826	-0.399838	779.403	62.074	3113.58	4	5.17989	1.007e+06	1.01108e+06	1.04596e+06	1.06115e+06	1.10877e+06	1.11446e+06	1.05807e+06	46308.2	4.37666	996556	1.00839e+06	1.09149e+06	1.03215e+06	51733.9	5.01226	781673	850177	897157	843002	58075.7	6.88915	775411	802985	827475	801957	26047.3	3.24796
Q8IZW8	Tensin-4 OS=Homo sapiens GN=TNS4 PE=1 SV=3 - [TENS4_HUMAN]	SLESPANSSSSLHSLGSVSLCTRPSDFQAPR	[21] DesthioBiotinIAM(new)	-0.40318	-0.534146	-0.399708	879.194	57.2479	3512.75	4	4.47653	1.29501e+06	1.4025e+06	1.40479e+06	1.46378e+06	1.4677e+06	1.47454e+06	1.41805e+06	68271.9	4.81448	1.0559e+06	1.07746e+06	1.08359e+06	1.07232e+06	14544.5	1.35636	961863	979221	996700	979261	17418.5	1.77874	1.01093e+06	1.0888e+06	1.12497e+06	1.0749e+06	58278.8	5.42179
Q9BYT8	Neurolysin, mitochondrial OS=Homo sapiens GN=NLN PE=1 SV=1 - [NEUL_HUMAN]	CKEENTIILQQLLPLR	[1] DesthioBiotinIAM(new)	-0.141576	-0.266514	-0.398587	736.425	67.3477	2206.25	3	0.894439	240729	243984	254070	267310	281001	290615	262951	20211.7	7.68649	177874	235698	301547	238373	61880.2	25.9594	174656	202327	278812	218598	53950.4	24.6802	153330	210163	234933	199475	41837.9	20.974
P31689	DnaJ homolog subfamily A member 1 OS=Homo sapiens GN=DNAJA1 PE=1 SV=2 - [DNJA1_HUMAN]	GAVECCPNCR	[5] DesthioBiotinIAM(new)|[6] Carbamidomethyl|[9] Carbamidomethyl	-0.0512084	-0.31232	-0.398291	731.326	41.036	1460.64	2	3.75812	1.46048e+06	1.61181e+06	1.68265e+06	1.7476e+06	1.79749e+06	1.81583e+06	1.68598e+06	133756	7.93344	1.20073e+06	1.55308e+06	2.12774e+06	1.62718e+06	467929	28.757	516412	1.52535e+06	2.03162e+06	1.35779e+06	771374	56.8108	1.15014e+06	1.27531e+06	1.41229e+06	1.27925e+06	131120	10.2498
Q8WXD5	Gem-associated protein 6 OS=Homo sapiens GN=GEMIN6 PE=1 SV=1 - [GEMI6_HUMAN]	LMHLFTSGDCK	[2] Oxidation|[10] DesthioBiotinIAM(new)	-0.45187	-0.514108	-0.396679	521.929	47.8323	1562.77	3	4.3189	241041	274907	293727	372351	406530	414821	333896	73510.1	22.0158	209961	226427	295941	244110	45636.2	18.695	158350	174049	369009	233803	117355	50.1939	237139	255315	268434	253629	15715.4	6.19622
P04439	HLA class I histocompatibility antigen, A-3 alpha chain OS=Homo sapiens GN=HLA-A PE=1 SV=2 - [1A03_HUMAN]	KGGSYTQAASSDSAQGSDVSLTACK	[24] DesthioBiotinIAM(new)	-0.38215	-0.0280777	-0.394814	905.772	46.5699	2714.29	3	4.15734	463688	470600	474623	476289	530478	531876	491259	31227.2	6.35657	312711	392309	425799	376940	58090	15.4109	401293	459187	584892	481791	93863.3	19.4822	363800	371736	385401	373645	10926.5	2.92431
P67936	Tropomyosin alpha-4 chain OS=Homo sapiens GN=TPM4 PE=1 SV=3 - [TPM4_HUMAN]	LAQAKEENVGLHQTLDQTLNELNCI	[24] DesthioBiotinIAM(new)	0.0805223	-0.197633	-0.394671	1030.87	67.0299	3089.59	3	3.60937	1.76685e+06	1.77632e+06	1.99094e+06	2.0934e+06	2.26224e+06	2.55118e+06	2.07349e+06	301120	14.5224	1.86458e+06	2.09994e+06	2.613e+06	2.19251e+06	382700	17.4549	1.32916e+06	1.7734e+06	2.32155e+06	1.80804e+06	497101	27.4939	1.30315e+06	1.59588e+06	1.83265e+06	1.57722e+06	265244	16.8171
O60664	Perilipin-3 OS=Homo sapiens GN=PLIN3 PE=1 SV=3 - [PLIN3_HUMAN]	DIAQQLQATCTSLGSSIQGLPTNVKDQVQQAR	[10] DesthioBiotinIAM(new)	-0.0483921	-0.113615	-0.394319	924.49	67.6539	3693.93	4	5.10657	713400	725836	751130	762834	803271	845550	767004	49643.5	6.47239	656533	762031	806544	741703	77043.9	10.3874	676926	719951	729877	708918	28146.5	3.97035	556576	563525	630619	583573	40890.3	7.00687
Q6NXG1	Epithelial splicing regulatory protein 1 OS=Homo sapiens GN=ESRP1 PE=1 SV=2 - [ESRP1_HUMAN]	GLPFTATAEEVVAFFGQHCPITGGK	[19] DesthioBiotinIAM(new)	-0.240307	0.090538	-0.394276	958.499	79.6546	2872.47	3	5.69877	2.90374e+06	3.12019e+06	3.37952e+06	3.38847e+06	3.48729e+06	3.93679e+06	3.36933e+06	350781	10.411	2.52903e+06	2.59422e+06	3.43382e+06	2.85236e+06	504614	17.6911	2.43548e+06	3.57533e+06	4.75185e+06	3.58755e+06	1.15824e+06	32.2849	2.20646e+06	2.52009e+06	2.96433e+06	2.56363e+06	380807	14.8542
P30050	60S ribosomal protein L12 OS=Homo sapiens GN=RPL12 PE=1 SV=1 - [RL12_HUMAN]	CTGGEVGATSALAPK	[1] DesthioBiotinIAM(new)	-0.296452	-0.360283	-0.393879	829.436	49.7758	1656.86	2	4.13615	1.06296e+06	1.06542e+06	1.10491e+06	1.15997e+06	1.20611e+06	1.24361e+06	1.1405e+06	75141.1	6.58845	898145	943344	944467	928652	26425.7	2.8456	800059	929054	936268	888460	76642.7	8.62646	847220	869186	887623	868009	20227.1	2.33028
P04350	Tubulin beta-4A chain OS=Homo sapiens GN=TUBB4A PE=1 SV=2 - [TBB4A_HUMAN]	MREIVHLQAGQCGNQIGAK	[1] Oxidation|[12] DesthioBiotinIAM(new)	-0.342448	-0.364476	-0.392468	592.064	44.8666	2364.23	4	4.31703	2.02322e+07	2.28714e+07	2.8026e+07	2.959e+07	2.96398e+07	3.05795e+07	2.68232e+07	4.24743e+06	15.8349	1.66425e+07	1.82945e+07	2.85294e+07	2.11555e+07	6.43925e+06	30.4377	1.42109e+07	1.98548e+07	2.8439e+07	2.08349e+07	7.16451e+06	34.387	1.90299e+07	2.10583e+07	2.12155e+07	2.04346e+07	1.219e+06	5.96537
Q9ULV4	Coronin-1C OS=Homo sapiens GN=CORO1C PE=1 SV=1 - [COR1C_HUMAN]	GLDVNKCEIAR	[7] DesthioBiotinIAM(new)	-0.0247525	0.108567	-0.390792	505.279	46.6312	1512.82	3	5.20042	162436	172765	175076	191968	195738	200373	183059	15066.1	8.23016	156013	181042	202782	179945	23403.8	13.006	193614	196288	202198	197367	4392.29	2.22544	122801	147553	148509	139621	14574.4	10.4385
Q7L4I2	Arginine/serine-rich coiled-coil protein 2 OS=Homo sapiens GN=RSRC2 PE=1 SV=1 - [RSRC2_HUMAN]	SEDEAGCSSVDEESYK	[7] DesthioBiotinIAM(new)	-0.227659	-0.0701219	-0.390654	1015.93	46.6366	2029.85	2	4.29405	346148	361017	386343	392604	412556	442405	390179	34750.5	8.90631	317754	335467	346439	333220	14474.1	4.3437	247851	315575	551577	371668	159444	42.8995	228702	267608	396555	297622	87859.4	29.5205
O14933	Ubiquitin/ISG15-conjugating enzyme E2 L6 OS=Homo sapiens GN=UBE2L6 PE=1 SV=4 - [UB2L6_HUMAN]	IYHPNVDENGQICLPIISSENWKPCTK	[13] Carbamidomethyl|[25] DesthioBiotinIAM(new)	-0.379552	-0.29833	-0.390617	863.688	62.4316	3450.72	4	4.76059	1.91118e+06	1.97435e+06	2.06404e+06	7.97756e+06	8.42756e+06	8.8162e+06	5.19515e+06	3.52886e+06	67.926	2.44261e+06	2.8268e+06	6.71075e+06	3.99339e+06	2.36113e+06	59.126	2.28146e+06	2.28815e+06	8.10436e+06	4.22466e+06	3.35992e+06	79.5312	1.65801e+06	1.91669e+06	8.31392e+06	3.96288e+06	3.77033e+06	95.1414
Q8N3X1	Formin-binding protein 4 OS=Homo sapiens GN=FNBP4 PE=1 SV=3 - [FNBP4_HUMAN]	DKTGTDSNSTESSETSTGSLCK	[21] DesthioBiotinIAM(new)	-0.190928	-0.244714	-0.38919	844.386	42.8299	2530.13	3	0.289693	119167	119702	127695	128366	130814	144979	128454	9402.94	7.3201	104935	116070	116588	112531	6583.14	5.85007	94584.2	115000	115654	108413	11980.4	11.0507	81891.4	105793	106561	98081.9	14026.6	14.3009
P05161	Ubiquitin-like protein ISG15 OS=Homo sapiens GN=ISG15 PE=1 SV=5 - [ISG15_HUMAN]	LAVHPSGVALQDRVPLASQGLGPGSTVLLVVDKCDEPLSILVR	[34] DesthioBiotinIAM(new)	0.152751	-0.0874112	-0.388946	943.937	70.9194	4714.65	5	5.82357	9.94471e+06	1.10858e+07	1.23603e+07	1.33568e+07	1.41358e+07	1.4165e+07	1.25081e+07	1.71643e+06	13.7226	9.04913e+06	1.47719e+07	1.78941e+07	1.39051e+07	4.48576e+06	32.26	1.0566e+07	1.20859e+07	1.26662e+07	1.17727e+07	1.08458e+06	9.21263	8.83388e+06	9.61922e+06	1.02037e+07	9.55225e+06	687338	7.19556
Q06203	Amidophosphoribosyltransferase OS=Homo sapiens GN=PPAT PE=1 SV=1 - [PUR1_HUMAN]	KHDIMIQENGNGLECFEK	[15] DesthioBiotinIAM(new)	-0.111718	-0.000217747	-0.388656	601.049	52.5081	2400.17	4	4.46953	82666.5	86281.2	86801.2	306590	352456	375209	215001	143851	66.9072	84336.8	86904.3	425699	198980	196348	98.6775	107099	122274	415531	214968	173858	80.8761	71082.1	85794.3	335802	164226	148771	90.5892
Q13162	Peroxiredoxin-4 OS=Homo sapiens GN=PRDX4 PE=1 SV=1 - [PRDX4_HUMAN]	TREEECHFYAGGQVYPGEASR	[6] DesthioBiotinIAM(new)	-0.1084	-0.213739	-0.387879	671.317	48.8921	2681.24	4	3.15021	2.38792e+06	2.50679e+06	2.5697e+06	2.57658e+06	2.60685e+06	2.72074e+06	2.56143e+06	110301	4.30623	2.06111e+06	2.48743e+06	2.57953e+06	2.37602e+06	276582	11.6405	1.77782e+06	2.36903e+06	2.47931e+06	2.20872e+06	377224	17.0788	1.76717e+06	1.96283e+06	2.14274e+06	1.95758e+06	187842	9.59561
Q8IU85	Calcium/calmodulin-dependent protein kinase type 1D OS=Homo sapiens GN=CAMK1D PE=1 SV=1 - [KCC1D_HUMAN]	MEGKGDVMSTACGTPGYVAPEVLAQKPYSK	[1] Oxidation|[8] Oxidation|[12] DesthioBiotinIAM(new)	-0.222494	-0.608003	-0.387206	861.418	52.4632	3441.64	4	-5.96682	253567	269226	315908	509883	542504	699970	431843	179942	41.6684	193909	414743	501724	370125	158684	42.8731	149366	181433	519204	283334	204897	72.3165	215762	292161	482651	330191	137449	41.6271
Q96N21	AP-4 complex accessory subunit tepsin OS=Homo sapiens GN=ENTHD2 PE=1 SV=1 - [AP4AT_HUMAN]	ACGLLNCEAVLQLLTCHLR	[2] Carbamidomethyl|[7] Carbamidomethyl|[16] DesthioBiotinIAM(new)	-0.112598	0.325677	-0.387179	827.438	74.9495	2479.29	3	2.62066	203834	238898	275228	349089	418845	475906	326967	106498	32.5714	225590	325471	356194	302418	68285.9	22.5799	332871	345496	550948	409772	122425	29.8764	226745	248088	275186	250006	24277.5	9.71077
Q96F63	Coiled-coil domain-containing protein 97 OS=Homo sapiens GN=CCDC97 PE=1 SV=1 - [CCD97_HUMAN]	LPVCSQQQGEPDLTEHEK	[4] DesthioBiotinIAM(new)	-0.29237	-0.276018	-0.38671	778.72	48.1716	2333.14	3	2.56968	626314	648860	673784	751120	761238	767225	704757	62416.5	8.85645	531083	556665	638680	575476	56210.9	9.76773	518490	596267	631350	582036	57760.2	9.92382	476856	553147	587144	539049	56479.5	10.4776
Q12959	Disks large homolog 1 OS=Homo sapiens GN=DLG1 PE=1 SV=2 - [DLG1_HUMAN]	LQIGDKLLAVNNVCLEEVTHEEAVTALK	[14] DesthioBiotinIAM(new)	-0.186033	-0.27192	-0.384706	837.21	66.2882	3344.81	4	2.87815	1.87204e+06	2.1196e+06	2.35264e+06	2.47846e+06	2.59496e+06	2.81493e+06	2.37211e+06	338016	14.2496	1.72966e+06	1.75818e+06	2.76755e+06	2.08513e+06	591163	28.3514	1.83463e+06	1.92793e+06	2.13129e+06	1.96462e+06	151692	7.72119	1.70639e+06	1.71884e+06	2.02542e+06	1.81688e+06	180706	9.94596
Q13751	Laminin subunit beta-3 OS=Homo sapiens GN=LAMB3 PE=1 SV=1 - [LAMB3_HUMAN]	GYCNRYPVCVACHPCFQTYDADLR	[3] Carbamidomethyl|[9] Carbamidomethyl|[12] Carbamidomethyl|[15] DesthioBiotinIAM(new)	-0.277845	-0.189978	-0.384088	816.12	55.5537	3260.45	4	2.81568	652524	706050	733164	778020	782009	786142	739652	53272.9	7.20243	495640	647063	687541	610081	101155	16.5805	618536	651522	675121	648393	28421.7	4.38341	509077	552365	638862	566768	66080.5	11.6592
P04075	Fructose-bisphosphate aldolase A OS=Homo sapiens GN=ALDOA PE=1 SV=2 - [ALDOA_HUMAN]	ALSDHHIYLEGTLLKPNMVTPGHACTQK	[18] Oxidation|[25] DesthioBiotinIAM(new)	-0.203508	-0.595244	-0.383601	678.155	50.5924	3385.74	5	3.5652	5.7392e+06	5.85958e+06	5.9469e+06	5.97666e+06	6.40184e+06	8.29165e+06	6.36931e+06	968083	15.1992	4.47977e+06	5.60758e+06	6.50667e+06	5.53134e+06	1.0156e+06	18.3609	3.92369e+06	4.27219e+06	4.45228e+06	4.21605e+06	268731	6.37399	4.36858e+06	4.69152e+06	5.58654e+06	4.88221e+06	630977	12.924
P05161	Ubiquitin-like protein ISG15 OS=Homo sapiens GN=ISG15 PE=1 SV=5 - [ISG15_HUMAN]	VPLASQGLGPGSTVLLVVDKCDEPLSILVR	[21] DesthioBiotinIAM(new)	0.00326626	-0.177294	-0.383302	1124.64	75.5269	3370.91	3	5.52599	2.15428e+06	2.18547e+06	2.44354e+06	2.49634e+06	2.50546e+06	3.2319e+06	2.50283e+06	389183	15.5497	1.4351e+06	2.92788e+06	3.16253e+06	2.50851e+06	936969	37.3517	1.73378e+06	2.44991e+06	2.45653e+06	2.21341e+06	415381	18.7666	1.66781e+06	1.90786e+06	2.18095e+06	1.91887e+06	256747	13.3801
Q9H2G2	STE20-like serine/threonine-protein kinase OS=Homo sapiens GN=SLK PE=1 SV=1 - [SLK_HUMAN]	MTGESECLNPSTQSR	[1] Oxidation|[7] DesthioBiotinIAM(new)	-0.061341	-0.526211	-0.382907	651.304	46.0644	1950.89	3	5.75441	272744	280658	339788	498318	521311	523241	406010	121175	29.8453	254692	409915	502719	389109	125316	32.2059	171784	186444	487542	281923	178222	63.2164	235458	256081	442556	311365	114082	36.6391
Q8WVC0	RNA polymerase-associated protein LEO1 OS=Homo sapiens GN=LEO1 PE=1 SV=1 - [LEO1_HUMAN]	ILPMAGRDPECQR	[4] Oxidation|[11] DesthioBiotinIAM(new)	-0.442937	-0.301588	-0.382782	599.978	43.3777	1796.91	3	4.62657	1.3583e+06	1.45629e+06	1.49749e+06	1.50442e+06	1.91483e+06	1.98732e+06	1.61977e+06	262869	16.2287	1.09385e+06	1.15717e+06	1.32367e+06	1.19156e+06	118709	9.96245	881233	1.37496e+06	1.68646e+06	1.31422e+06	406035	30.8956	1.11594e+06	1.17581e+06	1.43515e+06	1.2423e+06	169674	13.658
Q9UNH7	Sorting nexin-6 OS=Homo sapiens GN=SNX6 PE=1 SV=1 - [SNX6_HUMAN]	NKDVLQAETSQQLCCQKFEK	[14] Carbamidomethyl|[15] DesthioBiotinIAM(new)	-0.0589621	-0.0499186	-0.382038	674.093	48.5573	2692.34	4	4.28194	538602	557862	584892	606984	664288	668125	603459	53896.9	8.93133	548668	559296	629916	579293	44161.3	7.62331	441919	607203	699685	582936	130585	22.4013	400974	430735	557488	463066	83114.7	17.9488
O96008	Mitochondrial import receptor subunit TOM40 homolog OS=Homo sapiens GN=TOMM40 PE=1 SV=1 - [TOM40_HUMAN]	TPGAATASASGAAEDGACGCLPNPGTFEECHRK	[18] DesthioBiotinIAM(new)|[20] Carbamidomethyl|[30] Carbamidomethyl	-0.184904	-0.355163	-0.381735	897.413	51.4142	3585.62	4	5.63206	1.01718e+07	1.03168e+07	1.05722e+07	1.06825e+07	1.09269e+07	1.17452e+07	1.07359e+07	561892	5.23377	8.05838e+06	9.91941e+06	1.03556e+07	9.44446e+06	1.22003e+06	12.918	7.41303e+06	8.12444e+06	9.64192e+06	8.39313e+06	1.13848e+06	13.5644	6.96196e+06	8.53314e+06	9.22477e+06	8.23996e+06	1.15955e+06	14.0722
P14625	Endoplasmin OS=Homo sapiens GN=HSP90B1 PE=1 SV=1 - [ENPL_HUMAN]	LTESPCALVASQYGWSGNMER	[6] DesthioBiotinIAM(new)|[19] Oxidation	-0.0129907	-0.346368	-0.380909	871.085	63.5792	2610.23	3	4.69003	1.45887e+06	1.54357e+06	1.67081e+06	3.60405e+06	4.02716e+06	4.70036e+06	2.83414e+06	1.44285e+06	50.9097	1.58371e+06	1.68313e+06	5.15936e+06	2.80873e+06	2.03631e+06	72.4993	1.5209e+06	1.66172e+06	3.50506e+06	2.22922e+06	1.10715e+06	49.6651	978298	1.39813e+06	4.15303e+06	2.17648e+06	1.72456e+06	79.2359
Q14764	Major vault protein OS=Homo sapiens GN=MVP PE=1 SV=4 - [MVP_HUMAN]	RALCLLLGPDFFTDVITIETADHAR	[4] DesthioBiotinIAM(new)	-0.601941	-0.356728	-0.380192	771.668	77.6188	3082.64	4	5.47021	167153	194900	200170	213612	231606	244577	208670	27659.8	13.2553	114461	117988	180008	137486	36867.3	26.8154	134849	166556	187466	162957	26492.5	16.2573	141495	159503	179987	160328	19259.6	12.0126
Q9Y6E0	Serine/threonine-protein kinase 24 OS=Homo sapiens GN=STK24 PE=1 SV=1 - [STK24_HUMAN]	RPFSQCLSTIISPLFAELK	[6] DesthioBiotinIAM(new)	0.0886707	-0.300534	-0.379867	816.126	74.9025	2445.36	3	4.37845	681228	741652	768390	812895	924862	1.34423e+06	878876	242127	27.5496	742022	876554	1.18519e+06	934588	227212	24.3115	637494	711001	792322	713605	77447	10.8529	589994	655120	781159	675424	97186.3	14.3889
Q9Y314	Nitric oxide synthase-interacting protein OS=Homo sapiens GN=NOSIP PE=1 SV=1 - [NOSIP_HUMAN]	DAVKDFDCCCLSLQPCHDPVVTPDGYLYER	[8] DesthioBiotinIAM(new)|[9] Carbamidomethyl|[10] Carbamidomethyl|[16] Carbamidomethyl	-0.150422	-0.159922	-0.379831	967.947	63.7829	3867.76	4	5.57614	1.26089e+06	1.51864e+06	1.55506e+06	1.63589e+06	1.73503e+06	1.78984e+06	1.58256e+06	188342	11.9011	1.38667e+06	1.41232e+06	1.4786e+06	1.42587e+06	47439.3	3.32705	1.15996e+06	1.27664e+06	1.81292e+06	1.41651e+06	348222	24.5831	1.08267e+06	1.23151e+06	1.33454e+06	1.21624e+06	126625	10.4112
P00558	Phosphoglycerate kinase 1 OS=Homo sapiens GN=PGK1 PE=1 SV=3 - [PGK1_HUMAN]	DVLFLKDCVGPEVEK	[8] DesthioBiotinIAM(new)	-0.252314	-0.282504	-0.37977	663.027	62.3199	1986.06	3	4.56749	301362	315943	340890	373397	378985	382272	348808	34724.8	9.95527	247870	306861	323794	292842	39856.2	13.6102	258727	279742	321863	286777	32151	11.2111	262811	263006	278424	268080	8958.57	3.34175
P35080	Profilin-2 OS=Homo sapiens GN=PFN2 PE=1 SV=3 - [PROF2_HUMAN]	DSLYVDGDCTMDIR	[9] DesthioBiotinIAM(new)|[11] Oxidation	-0.32496	-0.457641	-0.379362	638.961	57.7156	1913.86	3	5.26856	165220	206605	211131	223073	277490	310564	232347	52650.9	22.6604	146858	194921	214684	185487	34883.1	18.8062	101642	110956	294971	169189	109029	64.4422	131017	170411	234441	178623	52198.4	29.2227
P45880	Voltage-dependent anion-selective channel protein 2 OS=Homo sapiens GN=VDAC2 PE=1 SV=2 - [VDAC2_HUMAN]	SCSGVEFSTSGSSNTDTGKVTGTLETK	[2] DesthioBiotinIAM(new)	-0.218036	-0.251869	-0.378906	992.813	51.3328	2975.42	3	4.29039	1.25096e+07	1.25233e+07	1.25359e+07	1.25776e+07	1.40349e+07	1.42093e+07	1.30651e+07	820917	6.28328	1.06071e+07	1.08224e+07	1.22682e+07	1.12325e+07	903310	8.04191	9.1811e+06	1.00449e+07	1.36905e+07	1.09722e+07	2.39343e+06	21.8136	9.57558e+06	9.95605e+06	1.06104e+07	1.00473e+07	523405	5.20939
O60841	Eukaryotic translation initiation factor 5B OS=Homo sapiens GN=EIF5B PE=1 SV=4 - [IF2P_HUMAN]	RLAHCEELR	[5] DesthioBiotinIAM(new)	0.150031	0.419906	-0.376267	474.928	37.3617	1421.76	3	4.29736	28563.9	51417.6	112305	143524	159907	170216	110989	58828	53.0035	24595.8	143674	201187	123152	90066.6	73.1343	24935.8	208199	212321	148485	107017	72.0724	18451.5	90203.6	147872	85508.9	64837.7	75.8256
Q9NWZ5	Uridine-cytidine kinase-like 1 OS=Homo sapiens GN=UCKL1 PE=1 SV=2 - [UCKL1_HUMAN]	AALASAHQCHPLPR	[9] DesthioBiotinIAM(new)	0.033601	0.0962488	-0.376149	442.743	39.8072	1766.94	4	4.46859	47179.4	53164.4	57330.2	63313.4	71200.3	87738	63320.9	14545.6	22.9712	53195.8	63352.7	77890.6	64813	12412	19.1504	66028.6	66261.7	70778.1	67689.5	2677.38	3.95539	48037.9	48061	50266	48788.3	1279.78	2.62312
Q3KQU3	MAP7 domain-containing protein 1 OS=Homo sapiens GN=MAP7D1 PE=1 SV=1 - [MA7D1_HUMAN]	THPSAAVPVCPR	[10] DesthioBiotinIAM(new)	-0.259109	-0.20554	-0.375502	510.947	43.9335	1529.82	3	3.22533	206270	210307	212606	227687	237313	252262	224407	18001.4	8.02175	166434	195963	200150	187516	18376.7	9.8001	169266	200331	214230	194609	23021.5	11.8296	151473	173712	193760	172982	21153.2	12.2286
Q9UNF0	Protein kinase C and casein kinase substrate in neurons protein 2 OS=Homo sapiens GN=PACSIN2 PE=1 SV=2 - [PACN2_HUMAN]	IDDGHRLCSDLMNCLHER	[8] DesthioBiotinIAM(new)|[12] Oxidation|[14] Carbamidomethyl	-0.914943	-0.483148	-0.373002	624.797	50.3991	2495.16	4	5.06767	170137	201697	229331	301142	306944	350901	260025	70106.5	26.9614	97304.7	113123	203297	137908	57178.1	41.461	85838.7	132776	339464	186026	134937	72.5368	136152	221030	245173	200785	57260.7	28.5185
Q14151	Scaffold attachment factor B2 OS=Homo sapiens GN=SAFB2 PE=1 SV=1 - [SAFB2_HUMAN]	ILDILGETCKSEPVKEESSELEQPFAQDTSSVGPDR	[9] DesthioBiotinIAM(new)	0.137502	-0.0775026	-0.370526	1058.28	63.1476	4229.09	4	5.94704	1.25998e+06	1.27966e+06	1.3478e+06	1.4277e+06	1.4476e+06	1.49774e+06	1.37675e+06	96079	6.9787	1.40024e+06	1.5249e+06	1.61811e+06	1.51442e+06	109313	7.21815	1.01798e+06	1.31698e+06	1.57926e+06	1.30474e+06	280839	21.5245	935805	1.08112e+06	1.17782e+06	1.06491e+06	121819	11.4393
Q5VTR2	E3 ubiquitin-protein ligase BRE1A OS=Homo sapiens GN=RNF20 PE=1 SV=2 - [BRE1A_HUMAN]	LCELEK	[2] DesthioBiotinIAM(new)	0.0255492	-0.0842972	-0.369145	515.786	46.8484	1029.56	2	4.06722	181364	205575	216662	229580	253826	254693	223616	28541.5	12.7636	215364	222242	245230	227612	15640.2	6.87142	163667	233785	235323	210925	40934.1	19.4069	124905	185935	208560	173133	43272.1	24.9936
A6NGZ7	Putative protein unc-93 homolog B1-like protein OS=Homo sapiens PE=5 SV=3 - [U93BL_HUMAN]	RPCPYEQAQGGDGPEEQ	[3] DesthioBiotinIAM(new)	-0.0332274	0.0939474	-0.368904	719.664	45.8468	2155.97	3	4.37111	358610	367972	385814	388934	425572	433533	393406	30265.9	7.6933	352075	391476	409795	384449	29494.9	7.672	378880	429530	451220	419877	37123.2	8.84145	272306	316665	324954	304642	28308.1	9.29227
P54578	Ubiquitin carboxyl-terminal hydrolase 14 OS=Homo sapiens GN=USP14 PE=1 SV=3 - [UBP14_HUMAN]	YEPFSFADDIGSNNCGYYDLQAVLTHQGR	[15] DesthioBiotinIAM(new)	-0.516527	-0.422252	-0.368829	1192.89	73.3993	3575.65	3	3.25646	1.15661e+06	1.22329e+06	1.30117e+06	1.41168e+06	1.53219e+06	1.53333e+06	1.35971e+06	158669	11.6693	715407	1.00628e+06	1.12984e+06	950510	212772	22.385	645792	1.11095e+06	1.28735e+06	1.0147e+06	331433	32.6632	996297	1.06451e+06	1.09812e+06	1.05298e+06	51881.6	4.92714
P14174	Macrophage migration inhibitory factor OS=Homo sapiens GN=MIF PE=1 SV=4 - [MIF_HUMAN]	LLCGLLAER	[3] DesthioBiotinIAM(new)	0.241871	-0.619298	-0.367006	642.382	62.4473	1282.75	2	4.52348	1.81451e+06	1.81775e+06	1.83161e+06	1.86435e+06	1.94663e+06	2.02739e+06	1.88371e+06	85826.7	4.55627	1.90433e+06	2.20324e+06	2.57502e+06	2.22753e+06	336005	15.0842	1.1138e+06	1.23991e+06	1.32509e+06	1.22627e+06	106305	8.66894	1.30018e+06	1.45886e+06	1.62279e+06	1.46061e+06	161312	11.0442
Q6P2H3	Centrosomal protein of 85 kDa OS=Homo sapiens GN=CEP85 PE=1 SV=1 - [CEP85_HUMAN]	VRESELQVHSALLGRPAPFGDVCLLR	[23] DesthioBiotinIAM(new)	-0.244328	-0.157233	-0.366172	632.553	60.7658	3157.73	5	4.04036	310350	319232	337170	346005	373016	389844	345936	30716.8	8.87932	221709	267642	386776	292042	85195.8	29.1724	298442	307472	324734	310216	13358.9	4.30634	257180	271550	276442	268391	10012.4	3.73052
P11413	Glucose-6-phosphate 1-dehydrogenase OS=Homo sapiens GN=G6PD PE=1 SV=4 - [G6PD_HUMAN]	TQVCGILREELFQGDAFHQSDTHIFIIMGASGDLAK	[4] DesthioBiotinIAM(new)|[28] Oxidation	0.0478845	-0.378098	-0.365341	852.835	67.0299	4259.14	5	5.22197	7.66365e+06	8.24906e+06	8.70078e+06	8.89964e+06	8.97113e+06	9.03626e+06	8.58676e+06	534202	6.22124	7.6375e+06	9.36913e+06	9.62299e+06	8.87654e+06	1.08052e+06	12.1728	5.89908e+06	6.0981e+06	7.8241e+06	6.60709e+06	1.05865e+06	16.0229	5.73645e+06	6.58873e+06	7.67213e+06	6.66577e+06	970139	14.554
Q15004	PCNA-associated factor OS=Homo sapiens GN=KIAA0101 PE=1 SV=1 - [PAF15_HUMAN]	KACPLQPDHTNDEKE	[3] DesthioBiotinIAM(new)	-0.153063	-0.691455	-0.364274	506.001	38.3748	2019.97	4	3.13856	96885.4	163348	163505	164281	170988	171785	155132	28784.4	18.5548	123364	144786	150398	139516	14266.8	10.2259	23656.3	113681	150850	96062.3	65401.6	68.0825	50064.8	150119	161364	120516	61271	50.8406
P12277	Creatine kinase B-type OS=Homo sapiens GN=CKB PE=1 SV=1 - [KCRB_HUMAN]	SKDYEFMWNPHLGYILTCPSNLGTGLR	[7] Oxidation|[18] DesthioBiotinIAM(new)	-0.185014	-0.804581	-0.364038	856.929	67.2525	3423.69	4	4.01345	6.32057e+07	7.08359e+07	8.03715e+07	2.57262e+08	2.72992e+08	3.08168e+08	1.75473e+08	1.15243e+08	65.6757	8.70718e+07	1.0152e+08	2.74467e+08	1.54353e+08	1.04272e+08	67.5546	6.90206e+07	8.18899e+07	1.50479e+08	1.00463e+08	4.37901e+07	43.5882	5.91037e+07	6.09646e+07	2.88951e+08	1.3634e+08	1.32169e+08	96.9406
Q99460	26S proteasome non-ATPase regulatory subunit 1 OS=Homo sapiens GN=PSMD1 PE=1 SV=2 - [PSMD1_HUMAN]	VLTMPETCR	[4] Oxidation|[8] DesthioBiotinIAM(new)	-0.347095	-0.530441	-0.363762	681.351	45.8557	1360.69	2	1.7978	478086	478853	535612	607232	611197	669935	563486	78427.3	13.9182	325026	460300	543653	442993	110336	24.907	249187	321515	599675	390125	185043	47.4317	377526	415856	520332	437905	73912.1	16.8786
P51648	Fatty aldehyde dehydrogenase OS=Homo sapiens GN=ALDH3A2 PE=1 SV=1 - [AL3A2_HUMAN]	HSFDTFSHQRPCLLK	[12] DesthioBiotinIAM(new)	-0.0258764	-0.0415828	-0.363513	528.778	48.461	2111.08	4	3.79582	151162	151676	161077	166733	183938	192436	167837	17032.3	10.1481	155313	164605	174643	164853	9667.44	5.86426	140334	164792	184079	163068	21923.3	13.4442	125824	131703	133837	130455	4150.19	3.18133
Q7Z5L9	Interferon regulatory factor 2-binding protein 2 OS=Homo sapiens GN=IRF2BP2 PE=1 SV=2 - [I2BP2_HUMAN]	LEDTHFVQCPSVPSHK	[9] DesthioBiotinIAM(new)	-0.117496	-0.278539	-0.36236	530.773	47.4858	2119.06	4	5.85142	653721	706607	728034	746282	768928	845085	741443	64201.1	8.65894	674037	685186	691132	683452	8678.61	1.26982	599128	608341	626323	611264	13831	2.26268	516113	590568	623604	576762	55059.2	9.54626
O14980	Exportin-1 OS=Homo sapiens GN=XPO1 PE=1 SV=1 - [XPO1_HUMAN]	TSSDPTCVEKEK	[7] DesthioBiotinIAM(new)	-0.00204953	0.234473	-0.361085	540.604	38.307	1618.79	3	1.41789	218796	248863	294873	473209	520965	564795	386917	150234	38.8285	197373	404896	556835	386368	180446	46.7031	241315	541545	582736	455199	186370	40.9426	222979	292453	388304	301245	83012.4	27.5564
P27816	Microtubule-associated protein 4 OS=Homo sapiens GN=MAP4 PE=1 SV=3 - [MAP4_HUMAN]	NVCLPPEMEVALTEDQVPALK	[3] DesthioBiotinIAM(new)|[8] Oxidation	-0.215221	-0.3272	-0.359981	870.121	65.9656	2607.34	3	4.29529	591027	644560	791026	1.08911e+06	1.23141e+06	1.55635e+06	983913	375960	38.2107	552441	910177	1.08005e+06	847557	269323	31.7763	311607	503602	1.53757e+06	784260	659411	84.0807	511399	590278	1.19824e+06	766641	375855	49.0263
O75348	V-type proton ATPase subunit G 1 OS=Homo sapiens GN=ATP6V1G1 PE=1 SV=3 - [VATG1_HUMAN]	GSCSTEVEKETQEK	[3] DesthioBiotinIAM(new)	-0.198293	-0.341249	-0.359636	617.631	38.3682	1849.87	3	-0.255978	3.31201e+06	3.47049e+06	3.66955e+06	3.70951e+06	3.9113e+06	3.99503e+06	3.67798e+06	258073	7.0167	2.47615e+06	3.45426e+06	3.68657e+06	3.20566e+06	642361	20.0383	464577	4.00646e+06	4.2387e+06	2.90324e+06	2.11514e+06	72.8543	2.71345e+06	2.84925e+06	3.03672e+06	2.86648e+06	162321	5.66274
Q15654	Thyroid receptor-interacting protein 6 OS=Homo sapiens GN=TRIP6 PE=1 SV=3 - [TRIP6_HUMAN]	RAYCEGCYVATLEK	[4] DesthioBiotinIAM(new)|[7] Carbamidomethyl	-0.0240873	-0.386307	-0.359582	653.657	50.1954	1957.95	3	4.45751	1.07471e+06	1.08332e+06	1.12707e+06	1.1276e+06	1.15023e+06	1.16598e+06	1.12149e+06	36108.6	3.2197	996792	1.07445e+06	1.23751e+06	1.10292e+06	122861	11.1396	756914	871756	945433	858034	95005.7	11.0725	791662	907811	922757	874077	71763.2	8.21018
Q01469	Fatty acid-binding protein, epidermal OS=Homo sapiens GN=FABP5 PE=1 SV=3 - [FABP5_HUMAN]	TTQFSCTLGEKFEETTADGRK	[6] DesthioBiotinIAM(new)	-0.163757	-0.255359	-0.359527	662.08	52.5014	2644.29	4	4.1904	840084	841113	871370	913274	953109	1.03652e+06	909245	76155.4	8.37568	738822	846116	850102	811680	63128.5	7.7775	724330	747166	813742	761746	46454.8	6.09846	678539	714290	733222	708684	27769.1	3.9184
Q96P70	Importin-9 OS=Homo sapiens GN=IPO9 PE=1 SV=3 - [IPO9_HUMAN]	ICPFTIAIFLK	[2] DesthioBiotinIAM(new)	-0.118093	-0.151566	-0.35897	781.466	77.6323	1560.92	2	4.39701	1.02273e+06	1.07449e+06	1.0855e+06	1.17072e+06	1.19072e+06	1.2061e+06	1.12504e+06	74237.1	6.5986	924731	1.02499e+06	1.16014e+06	1.03662e+06	118134	11.396	599005	1.18063e+06	1.2589e+06	1.01285e+06	360528	35.5955	748631	853880	1.02915e+06	877220	141709	16.1543
Q9HD67	Unconventional myosin-X OS=Homo sapiens GN=MYO10 PE=1 SV=3 - [MYO10_HUMAN]	RLEEEACR	[7] DesthioBiotinIAM(new)	-0.305794	-0.350667	-0.358676	434.561	37.6503	1300.66	3	4.98718	2710.23	2719.97	3104.48	3173.64	3221.25	3240.13	3028.28	247.089	8.15938	2185.45	2516.06	2648.11	2449.87	238.325	9.72808	2129.73	2452.09	2542.71	2374.85	217.054	9.13973	2260.39	2343.17	2481.54	2361.7	111.737	4.7312
P47756	F-actin-capping protein subunit beta OS=Homo sapiens GN=CAPZB PE=1 SV=4 - [CAPZB_HUMAN]	DYLLCDYNRDGDSYR	[5] DesthioBiotinIAM(new)	-0.332545	-0.477696	-0.358179	722.001	57.5157	2162.98	3	5.34391	431599	434922	474862	475103	501684	516583	472459	34329	7.26603	369101	373289	383197	375196	7239.01	1.9294	256137	360463	401251	339284	74839.6	22.0581	325428	355645	424691	368588	50881.1	13.8043
Q9NW68	BSD domain-containing protein 1 OS=Homo sapiens GN=BSDC1 PE=1 SV=1 - [BSDC1_HUMAN]	DLTEFTQVVQHDTACTIAATASVVK	[15] DesthioBiotinIAM(new)	-0.156299	-0.0350978	-0.357699	982.176	76.6619	2943.51	3	1.81668	2.62637e+06	2.68237e+06	2.76292e+06	2.79017e+06	2.83164e+06	2.9369e+06	2.77173e+06	109914	3.96553	2.4283e+06	2.47865e+06	2.55446e+06	2.48714e+06	63507.1	2.55342	1.85518e+06	2.76431e+06	3.49585e+06	2.70511e+06	821938	30.3846	2.07139e+06	2.19887e+06	2.21897e+06	2.16308e+06	80036.1	3.7001
Q14149	MORC family CW-type zinc finger protein 3 OS=Homo sapiens GN=MORC3 PE=1 SV=3 - [MORC3_HUMAN]	IHETQETTDKSADDAGCQLQELR	[17] DesthioBiotinIAM(new)	-0.205883	-0.0810058	-0.356986	721.851	46.6997	2883.38	4	2.93493	709382	742624	744513	748858	840759	848588	772454	57736.1	7.47438	586318	685614	737240	669724	76705.7	11.4533	670012	690803	830015	730277	86999	11.9131	589652	598601	621129	603127	16219.3	2.6892
O95994	Anterior gradient protein 2 homolog OS=Homo sapiens GN=AGR2 PE=1 SV=1 - [AGR2_HUMAN]	TSNKPLMIIHHLDECPHSQALKK	[7] Oxidation|[15] DesthioBiotinIAM(new)	-0.721984	-0.404661	-0.356124	591.32	44.044	2951.56	5	4.76543	2.63199e+07	2.87916e+07	3.34399e+07	4.8659e+07	6.3314e+07	6.74284e+07	4.46588e+07	1.78685e+07	40.0112	1.90163e+07	2.13478e+07	4.08609e+07	2.7075e+07	1.19957e+07	44.3055	3.08218e+07	3.38102e+07	3.65757e+07	3.37359e+07	2.87764e+06	8.52989	2.38259e+07	2.45153e+07	5.63294e+07	3.48902e+07	1.85701e+07	53.2244
P13010	X-ray repair cross-complementing protein 5 OS=Homo sapiens GN=XRCC5 PE=1 SV=3 - [XRCC5_HUMAN]	ETVYCLNDDDETEVLKEDIIQGFR	[5] DesthioBiotinIAM(new)	-0.0535823	-0.120102	-0.354291	1047.51	70.9194	3139.52	3	5.08983	1.43313e+06	1.44909e+06	1.5875e+06	1.59995e+06	1.63195e+06	1.64337e+06	1.5575e+06	92563	5.94306	1.31033e+06	1.55751e+06	1.6343e+06	1.50071e+06	169285	11.2803	1.26841e+06	1.43048e+06	1.60038e+06	1.43309e+06	165996	11.5831	1.09042e+06	1.18566e+06	1.379e+06	1.21836e+06	147046	12.0692
Q16186	Proteasomal ubiquitin receptor ADRM1 OS=Homo sapiens GN=ADRM1 PE=1 SV=2 - [ADRM1_HUMAN]	TSGNVEDDLIIFPDDCEFKR	[16] DesthioBiotinIAM(new)	-0.230483	-0.482085	-0.353197	870.424	65.6485	2608.25	3	0.869857	1.64386e+06	1.67808e+06	1.79289e+06	1.88065e+06	1.91071e+06	1.91911e+06	1.80421e+06	120113	6.65735	1.41503e+06	1.52548e+06	1.67295e+06	1.53782e+06	129401	8.41455	910148	1.24015e+06	1.72484e+06	1.29171e+06	409786	31.7242	1.27951e+06	1.46589e+06	1.49188e+06	1.41242e+06	115842	8.20166
O43707	Alpha-actinin-4 OS=Homo sapiens GN=ACTN4 PE=1 SV=2 - [ACTN4_HUMAN]	CQLEINFNTLQTK	[1] DesthioBiotinIAM(new)	-0.324433	-0.289143	-0.352945	924.491	63.9126	1846.97	2	3.5216	2.83527e+06	2.88378e+06	2.89939e+06	2.97615e+06	3.04358e+06	3.14852e+06	2.96445e+06	116368	3.92545	2.05106e+06	2.43187e+06	2.6194e+06	2.36744e+06	289596	12.2324	2.00102e+06	2.48506e+06	2.79213e+06	2.42607e+06	398842	16.4398	2.30407e+06	2.31308e+06	2.3462e+06	2.32112e+06	22186.7	0.955864
Q3ZCM7	Tubulin beta-8 chain OS=Homo sapiens GN=TUBB8 PE=1 SV=2 - [TBB8_HUMAN]	KEAESCDCLQGFQLTHSLGGGTGSGMGTLLLSK	[6] Carbamidomethyl|[8] DesthioBiotinIAM(new)|[26] Oxidation	-0.290702	-0.508282	-0.351711	924.457	60.4038	3693.8	4	4.70966	1.34613e+07	1.46799e+07	1.60084e+07	1.70776e+07	1.91163e+07	1.9349e+07	1.66154e+07	2.36659e+06	14.2433	1.056e+07	1.09413e+07	1.92483e+07	1.35832e+07	4.90981e+06	36.1463	8.50847e+06	1.05041e+07	1.60323e+07	1.16816e+07	3.8977e+06	33.3661	1.16508e+07	1.17985e+07	1.56129e+07	1.30207e+07	2.24605e+06	17.2498
Q9UPT9	Ubiquitin carboxyl-terminal hydrolase 22 OS=Homo sapiens GN=USP22 PE=1 SV=2 - [UBP22_HUMAN]	KITSNCTIGLR	[6] DesthioBiotinIAM(new)	-0.266642	-0.125565	-0.351166	501.29	46.8693	1500.85	3	2.28751	230299	231010	238558	239970	240334	277377	242924	17452	7.18414	189212	198669	217913	201931	14626	7.24304	207476	219986	240564	222675	16707.3	7.50299	174249	183513	213561	190441	20551.2	10.7914
P08238	Heat shock protein HSP 90-beta OS=Homo sapiens GN=HSP90AB1 PE=1 SV=4 - [HS90B_HUMAN]	RGFEVVYMTEPIDEYCVQQLK	[8] Oxidation|[16] DesthioBiotinIAM(new)	-0.314103	-0.512104	-0.349818	953.81	62.2103	2858.41	3	3.69402	535746	612483	810013	1.07284e+06	1.18592e+06	1.18746e+06	900743	289032	32.0882	539701	644694	989145	724513	235113	32.4512	328345	388859	1.1776e+06	631600	473814	75.018	579862	617613	922919	706798	188116	26.6152
O14980	Exportin-1 OS=Homo sapiens GN=XPO1 PE=1 SV=1 - [XPO1_HUMAN]	LDINLLDNVVNCLYHGEGAQQR	[12] DesthioBiotinIAM(new)	0.0122249	-0.0484428	-0.349816	927.482	75.5591	2779.42	3	6.26458	6.19139e+06	6.78481e+06	9.11622e+06	9.21893e+06	9.75081e+06	1.01753e+07	8.53957e+06	1.64498e+06	19.263	6.47256e+06	8.71306e+06	1.06511e+07	8.61224e+06	2.09109e+06	24.2805	6.24573e+06	8.85407e+06	9.67297e+06	8.25759e+06	1.78979e+06	21.6745	5.15414e+06	5.97707e+06	8.97138e+06	6.70086e+06	2.00891e+06	29.9799
P41091	Eukaryotic translation initiation factor 2 subunit 3 OS=Homo sapiens GN=EIF2S3 PE=1 SV=3 - [IF2G_HUMAN]	IYKLDDPSCPRPECYR	[9] DesthioBiotinIAM(new)|[14] Carbamidomethyl	-0.37256	-0.408079	-0.349558	577.789	48.4747	2307.13	4	5.21162	90556.3	101126	108236	108433	112035	113629	105669	8569.08	8.10934	77239.2	83601	84019.8	81620	3799.65	4.6553	59017.1	84696.6	95191.5	79635	18610.8	23.3701	80430.5	81694.9	86669.8	82931.7	3298.42	3.97727
Q96I24	Far upstream element-binding protein 3 OS=Homo sapiens GN=FUBP3 PE=1 SV=2 - [FUBP3_HUMAN]	SSGCFPNMAAK	[4] DesthioBiotinIAM(new)|[8] Oxidation	-0.259146	-0.402097	-0.349188	712.839	45.6133	1423.66	2	3.90364	2.38831e+06	2.44192e+06	2.65131e+06	2.6978e+06	3.00256e+06	3.03035e+06	2.70204e+06	270842	10.0236	1.82099e+06	2.42119e+06	2.53115e+06	2.25778e+06	382243	16.9301	1.31567e+06	1.62017e+06	3.19853e+06	2.04479e+06	1.0107e+06	49.4282	1.87565e+06	1.96603e+06	2.52183e+06	2.12117e+06	349912	16.4962
P30153	Serine/threonine-protein phosphatase 2A 65 kDa regulatory subunit A alpha isoform OS=Homo sapiens GN=PPP2R1A PE=1 SV=4 - [2AAA_HUMAN]	DNTIEHLLPLFLAQLKDECPEVR	[19] DesthioBiotinIAM(new)	-0.175524	-0.192558	-0.348477	748.155	78.5907	2988.59	4	5.80253	1.8086e+07	1.84266e+07	2.09655e+07	2.15312e+07	2.22303e+07	2.29255e+07	2.06942e+07	2.00284e+06	9.67828	1.56234e+07	1.73503e+07	2.1997e+07	1.83236e+07	3.29634e+06	17.9896	1.14335e+07	1.88076e+07	2.40844e+07	1.81085e+07	6.35439e+06	35.0906	1.50277e+07	1.61188e+07	1.76139e+07	1.62535e+07	1.29833e+06	7.98801
Q68CZ2	Tensin-3 OS=Homo sapiens GN=TNS3 PE=1 SV=2 - [TENS3_HUMAN]	SCPETLTHAVGMSESPIGPK	[2] DesthioBiotinIAM(new)|[12] Oxidation	-0.271903	-0.333109	-0.348165	785.059	51.164	2352.16	3	4.32156	1.07575e+06	1.08818e+06	1.19318e+06	1.60183e+06	1.78036e+06	2.0521e+06	1.46523e+06	407491	27.8106	1.02684e+06	1.20312e+06	1.41068e+06	1.21355e+06	192129	15.832	734878	909461	1.84508e+06	1.16314e+06	596992	51.326	972757	1.03056e+06	1.44987e+06	1.15106e+06	260382	22.621
P08238	Heat shock protein HSP 90-beta OS=Homo sapiens GN=HSP90AB1 PE=1 SV=4 - [HS90B_HUMAN]	RVFIMDSCDELIPEYLNFIR	[5] Oxidation|[8] DesthioBiotinIAM(new)	-0.385607	-0.571475	-0.348162	929.144	73.4804	2784.41	3	4.08678	1.18463e+07	1.20822e+07	1.4639e+07	1.91443e+07	2.14006e+07	2.16267e+07	1.67899e+07	4.50388e+06	26.825	9.07501e+06	9.62234e+06	1.98584e+07	1.28519e+07	6.07396e+06	47.2611	6.75128e+06	9.85212e+06	1.72917e+07	1.12984e+07	5.41701e+06	47.945	9.46639e+06	9.90585e+06	2.01973e+07	1.31899e+07	6.07262e+06	46.0401
Q8IZW8	Tensin-4 OS=Homo sapiens GN=TNS4 PE=1 SV=3 - [TENS4_HUMAN]	SNSQTLSDAPFTTCPEGPAR	[14] DesthioBiotinIAM(new)	-0.31517	-0.475413	-0.348075	792.383	57.0855	2374.13	3	2.22662	337883	343482	352449	360867	374285	383477	358741	17694.7	4.93244	272592	280282	312146	288340	20971.9	7.27331	251421	259534	263129	258028	5997.33	2.3243	251337	277481	316696	281838	32896.4	11.6721
Q86Y22	Collagen alpha-1(XXIII) chain OS=Homo sapiens GN=COL23A1 PE=2 SV=1 - [CONA1_HUMAN]	GQKGEPGPPGLDQPCPVGPDGLPVPGCWHK	[15] DesthioBiotinIAM(new)	0.1446	-0.553596	-0.345888	829.661	73.5765	3314.62	4	-5.31156	1.56492e+08	1.61143e+08	1.63695e+08	1.73288e+08	2.08663e+08	2.08904e+08	1.78697e+08	2.39414e+07	13.3978	1.86176e+08	1.99685e+08	2.06748e+08	1.97536e+08	1.04532e+07	5.2918	1.06476e+08	1.26643e+08	1.32132e+08	1.2175e+08	1.35098e+07	11.0964	1.32528e+08	1.38641e+08	1.50641e+08	1.40603e+08	9.21466e+06	6.55366
Q9Y6A5	Transforming acidic coiled-coil-containing protein 3 OS=Homo sapiens GN=TACC3 PE=1 SV=1 - [TACC3_HUMAN]	SGCSEAQPPESPETR	[3] DesthioBiotinIAM(new)	-0.214282	-0.0408793	-0.345254	935.938	43.4778	1869.86	2	4.47822	444872	447075	448699	471502	487018	519211	469729	29406.8	6.26038	347884	404616	462186	404895	57151.5	14.1151	394015	479097	496707	456606	54916.4	12.0271	365093	367194	376983	369757	6346.03	1.71627
P61247	40S ribosomal protein S3a OS=Homo sapiens GN=RPS3A PE=1 SV=2 - [RS3A_HUMAN]	NCLTNFHGMDLTR	[2] DesthioBiotinIAM(new)|[9] Oxidation	-0.0815904	-0.618573	-0.344958	611.966	51.4087	1832.88	3	5.63467	622531	633744	932000	997641	1.01777e+06	1.04234e+06	874338	194226	22.2141	591172	868005	1.01961e+06	826263	217249	26.293	373609	446668	888132	569470	278377	48.8836	524534	678800	861847	688394	168861	24.5297
P62753	40S ribosomal protein S6 OS=Homo sapiens GN=RPS6 PE=1 SV=1 - [RS6_HUMAN]	GCIVDANLSVLNLVIVK	[2] DesthioBiotinIAM(new)	0.114448	-0.288908	-0.344215	1033.61	77.8657	2065.21	2	3.94854	979329	1.04912e+06	1.06228e+06	1.06983e+06	1.2365e+06	1.25942e+06	1.10941e+06	112247	10.1177	1.13728e+06	1.18656e+06	1.27918e+06	1.20101e+06	72041.7	5.99844	816581	938835	968819	908078	80644.7	8.88081	719347	857076	1.04535e+06	873925	163654	18.7264
P23919	Thymidylate kinase OS=Homo sapiens GN=DTYMK PE=1 SV=4 - [KTHY_HUMAN]	LVEALCAAGHR	[6] DesthioBiotinIAM(new)	-0.395304	-0.329275	-0.344153	479.268	48.1295	1434.78	3	3.24752	54567.6	57147.3	57575.8	58312.7	60130.1	66327.5	59010.2	4013.68	6.80167	38120	44051.5	52430	44867.2	7189.78	16.0246	39444.8	47033.4	54426.9	46968.3	7491.24	15.9496	41696.4	44474.3	53288.6	46486.5	6052.37	13.0196
P49790	Nuclear pore complex protein Nup153 OS=Homo sapiens GN=NUP153 PE=1 SV=2 - [NU153_HUMAN]	SHLNFSMLESPALHCQPSTSSAFPIGSSGFSLVK	[15] DesthioBiotinIAM(new)	-0.338275	-0.208585	-0.343775	965.739	68.0151	3858.93	4	5.46184	251872	283778	389287	1.10349e+06	1.13608e+06	1.17234e+06	722807	456848	63.2047	381201	386576	947414	571731	325363	56.9084	352053	377975	1.14649e+06	625507	451372	72.1611	239095	263916	1.20565e+06	569555	551018	96.7453
P47974	Zinc finger protein 36, C3H1 type-like 2 OS=Homo sapiens GN=ZFP36L2 PE=1 SV=3 - [TISD_HUMAN]	HSASNLHALAHPAPSPGSCSPK	[19] DesthioBiotinIAM(new)	-0.603511	-0.182339	-0.34265	616.314	39.6759	2461.23	4	-1.06742	230471	237011	238317	250152	257622	264309	246314	13175	5.34887	123584	174370	188381	162111	34093.5	21.0309	190143	221069	239997	217070	25166.4	11.5937	178554	189027	215141	194241	18842.6	9.70066
Q6P9B6	TLD domain-containing protein 1 OS=Homo sapiens GN=TLDC1 PE=1 SV=2 - [TLDC1_HUMAN]	SFCSQFLPEEQAEIDQLFDALSSDKNSPNVSSK	[3] DesthioBiotinIAM(new)	-0.286457	0.0096961	-0.342641	1319.64	78.8777	3955.9	3	6.40724	1.47327e+06	1.59554e+06	1.83334e+06	2.04927e+06	2.12623e+06	2.13772e+06	1.86923e+06	284088	15.1982	1.38552e+06	1.44276e+06	1.76954e+06	1.53261e+06	207179	13.5181	1.18289e+06	1.79669e+06	2.66593e+06	1.88183e+06	745181	39.5986	1.24115e+06	1.25747e+06	1.92358e+06	1.47407e+06	389376	26.4151
P13667	Protein disulfide-isomerase A4 OS=Homo sapiens GN=PDIA4 PE=1 SV=2 - [PDIA4_HUMAN]	KDVLIEFYAPWCGHCK	[12] DesthioBiotinIAM(new)|[15] Carbamidomethyl	-0.319065	-0.415656	-0.341084	1131.57	62.2885	2261.12	2	3.4372	106886	124129	147835	343964	475118	517600	285922	184465	64.5159	121477	162965	403133	229192	152059	66.3457	121720	127617	393712	214350	155361	72.48	93095.1	101931	482136	225721	222106	98.3987
Q99615	DnaJ homolog subfamily C member 7 OS=Homo sapiens GN=DNAJC7 PE=1 SV=2 - [DNJC7_HUMAN]	ALEFAPACHR	[8] DesthioBiotinIAM(new)	-0.152985	-0.183343	-0.340895	470.918	50.0335	1409.73	3	5.3931	160185	160451	160644	166021	167753	178708	165627	7169.81	4.32889	140500	143715	162674	148963	11982.3	8.04382	126735	151466	159382	145861	17030.3	11.6757	127355	127985	136972	130771	5379.71	4.11384
O75940	Survival of motor neuron-related-splicing factor 30 OS=Homo sapiens GN=SMNDC1 PE=1 SV=1 - [SPF30_HUMAN]	VGVGTCGIADKPMTQYQDTSK	[6] DesthioBiotinIAM(new)|[13] Oxidation	-0.382757	-0.102317	-0.340694	837.749	47.3895	2510.23	3	4.55555	2.47238e+06	2.56696e+06	2.94972e+06	3.41753e+06	3.57748e+06	3.9619e+06	3.15766e+06	592006	18.7482	2.40529e+06	2.42229e+06	2.43792e+06	2.42183e+06	16319.4	0.673845	2.09897e+06	2.3784e+06	4.34706e+06	2.94147e+06	1.22526e+06	41.6546	1.88149e+06	2.24282e+06	3.35614e+06	2.49348e+06	768616	30.825
P11766	Alcohol dehydrogenase class-3 OS=Homo sapiens GN=ADH5 PE=1 SV=4 - [ADHX_HUMAN]	IDPLAPLDKVCLLGCGISTGYGAAVNTAK	[11] DesthioBiotinIAM(new)|[15] Carbamidomethyl	-0.00841705	-0.326834	-0.340324	1071.91	73.6258	3212.7	3	2.43071	8.18005e+06	8.43398e+06	8.49859e+06	8.79247e+06	8.83087e+06	9.51587e+06	8.70864e+06	463154	5.31832	7.24128e+06	8.58249e+06	1.01502e+07	8.65798e+06	1.4559e+06	16.8158	6.81016e+06	6.85162e+06	7.168e+06	6.94326e+06	195729	2.81898	6.73622e+06	6.81278e+06	7.08691e+06	6.87864e+06	184383	2.68051
O43143	Putative pre-mRNA-splicing factor ATP-dependent RNA helicase DHX15 OS=Homo sapiens GN=DHX15 PE=1 SV=2 - [DHX15_HUMAN]	IAPQYYDMSNFPQCEAKR	[8] Oxidation|[14] DesthioBiotinIAM(new)	-0.143611	-0.449309	-0.338268	825.064	51.4933	2472.17	3	5.06801	1.12703e+06	1.14084e+06	1.16222e+06	1.42598e+06	1.65607e+06	1.75172e+06	1.37731e+06	277517	20.1492	887765	1.2082e+06	1.64446e+06	1.24681e+06	379824	30.4636	671239	722029	1.63293e+06	1.00873e+06	541167	53.6483	1.03552e+06	1.09892e+06	1.13388e+06	1.08944e+06	49860.9	4.57675
P04350	Tubulin beta-4A chain OS=Homo sapiens GN=TUBB4A PE=1 SV=2 - [TBB4A_HUMAN]	VSDTVVEPYNATLSVHQLVENTDETYCIDNEALYDICFR	[27] DesthioBiotinIAM(new)|[37] Carbamidomethyl	0.0933578	-0.0122238	-0.337478	1208.83	75.5591	4831.29	4	6.2587	1.02703e+08	1.0288e+08	1.17066e+08	1.21001e+08	1.24684e+08	1.32031e+08	1.16727e+08	1.18688e+07	10.1679	1.21887e+08	1.24362e+08	1.27343e+08	1.24531e+08	2.73172e+06	2.19361	1.04837e+08	1.19515e+08	1.22875e+08	1.15742e+08	9.59246e+06	8.28777	8.4529e+07	9.22572e+07	1.00356e+08	9.23807e+07	7.91424e+06	8.56698
P62191	26S protease regulatory subunit 4 OS=Homo sapiens GN=PSMC1 PE=1 SV=1 - [PRS4_HUMAN]	GPDAASKLPLVTPHTQCR	[17] DesthioBiotinIAM(new)	-0.151862	-0.172618	-0.33718	547.55	48.6935	2186.17	4	3.99919	112848	117192	119412	124785	129079	129871	122198	6828.79	5.58831	100796	112705	116466	109989	8180.06	7.43717	93126	114895	117232	108418	13294.5	12.2623	87118.2	98629.6	104443	96730.3	8817.18	9.11522
P48163	NADP-dependent malic enzyme OS=Homo sapiens GN=ME1 PE=1 SV=1 - [MAOX_HUMAN]	AECSAEQCYK	[3] DesthioBiotinIAM(new)|[8] Carbamidomethyl	-0.0482832	-0.659755	-0.336507	742.832	41.0155	1483.65	2	4.31834	488752	572421	573364	589500	624228	626470	579122	50257.2	8.67817	423281	627798	629105	560062	118457	21.1507	6317.77	480095	613315	366576	319024	87.0281	400916	415767	559236	458640	87434.7	19.0639
Q14135	Transcription cofactor vestigial-like protein 4 OS=Homo sapiens GN=VGLL4 PE=1 SV=4 - [VGLL4_HUMAN]	QQNRPSVITCASAGAR	[10] DesthioBiotinIAM(new)	-0.162619	-0.115517	-0.336297	652.349	44.3561	1954.02	3	4.22749	219842	226558	228667	230713	247295	250052	233854	12077.7	5.16461	191969	208732	226077	208926	17054.8	8.16309	212768	214197	220614	215860	4179.1	1.93603	182055	185589	188044	185230	3010.87	1.62548
Q08379	Golgin subfamily A member 2 OS=Homo sapiens GN=GOLGA2 PE=1 SV=3 - [GOGA2_HUMAN]	LAHLLASAQKEPEAAAPAPGTGGDSVCGETHR	[27] DesthioBiotinIAM(new)	-0.0761771	-0.164273	-0.335867	688.353	46.6366	3436.73	5	3.86113	4.27564e+06	4.36531e+06	4.55468e+06	4.69364e+06	4.78622e+06	4.88397e+06	4.59324e+06	239229	5.20827	3.72592e+06	4.64453e+06	4.70055e+06	4.357e+06	547248	12.5602	3.84635e+06	3.96054e+06	4.48984e+06	4.09891e+06	343334	8.37622	3.35563e+06	3.72771e+06	3.83446e+06	3.63926e+06	251366	6.90707
Q32MZ4	Leucine-rich repeat flightless-interacting protein 1 OS=Homo sapiens GN=LRRFIP1 PE=1 SV=2 - [LRRF1_HUMAN]	SEDADRCTLPEHESPSQDISDACEAESTER	[7] DesthioBiotinIAM(new)|[23] Carbamidomethyl	-0.0812286	-0.134059	-0.335119	915.901	49.4412	3659.58	4	4.63388	4.36461e+06	4.66177e+06	4.72762e+06	5.05913e+06	5.17552e+06	5.21188e+06	4.86675e+06	336148	6.90703	3.83438e+06	4.82306e+06	5.14349e+06	4.60031e+06	682388	14.8335	4.14694e+06	4.34964e+06	4.80812e+06	4.4349e+06	338734	7.63791	3.80163e+06	3.84236e+06	3.92991e+06	3.85797e+06	65545.4	1.69896
O14757	Serine/threonine-protein kinase Chk1 OS=Homo sapiens GN=CHEK1 PE=1 SV=2 - [CHK1_HUMAN]	SCMNQVTISTTDRR	[2] DesthioBiotinIAM(new)|[3] Oxidation	-0.51265	-0.406671	-0.334831	641.986	42.6238	1922.94	3	3.75352	195054	195093	215342	269073	289416	305120	244850	49054	20.0344	152064	155731	207075	171623	30756.4	17.9209	119015	166722	268379	184705	76288.7	41.3029	173108	193085	216214	194136	21572	11.1118
Q96CM8	Acyl-CoA synthetase family member 2, mitochondrial OS=Homo sapiens GN=ACSF2 PE=1 SV=2 - [ACSF2_HUMAN]	MVSTPIGGLSYVQGCTK	[15] DesthioBiotinIAM(new)	-0.0743445	-0.120081	-0.334767	679.692	61.4671	2036.05	3	5.13724	114048	116187	155637	179398	222813	223915	168666	49002.6	29.053	135220	160138	185227	160195	25003.5	15.6082	122716	130012	212861	155196	50072	32.2637	88824.9	111804	200584	133738	59019.9	44.1311
Q86WA6	Valacyclovir hydrolase OS=Homo sapiens GN=BPHL PE=1 SV=1 - [BPHL_HUMAN]	HLPDGNICR	[8] DesthioBiotinIAM(new)	-0.416713	-0.299387	-0.334273	440.902	44.4617	1319.68	3	4.58162	60837.7	65288.6	67835.9	68096.9	70958.2	71900.9	67486.4	4026.71	5.9667	41491.2	49650.3	60526.6	50556	9550	18.8899	51936	51939.3	60642.5	54839.3	5025.73	9.16447	41738.3	57934.9	60914.1	53529.1	10319.2	19.2778
P29034	Protein S100-A2 OS=Homo sapiens GN=S100A2 PE=1 SV=3 - [S10A2_HUMAN]	YSCQEGDKFK	[3] DesthioBiotinIAM(new)	-0.094522	-0.0330547	-0.333635	500.912	41.1598	1499.71	3	4.37818	2.42793e+06	2.58688e+06	2.60526e+06	2.60859e+06	2.67409e+06	2.75076e+06	2.60892e+06	107352	4.11482	1.85429e+06	2.6047e+06	2.87141e+06	2.44347e+06	527382	21.5834	2.32107e+06	2.47055e+06	2.85785e+06	2.54982e+06	277029	10.8646	1.88892e+06	2.1501e+06	2.17178e+06	2.07027e+06	157425	7.60408
O60664	Perilipin-3 OS=Homo sapiens GN=PLIN3 PE=1 SV=3 - [PLIN3_HUMAN]	VASMPLISSTCDMVSAAYASTK	[4] Oxidation|[11] DesthioBiotinIAM(new)|[13] Oxidation	-0.22372	-0.532932	-0.333109	854.418	58.5585	2560.23	3	3.33404	4.86622e+06	5.79072e+06	5.91231e+06	9.72021e+06	9.99732e+06	1.00537e+07	7.72342e+06	2.43997e+06	31.5918	4.5124e+06	6.01192e+06	9.31764e+06	6.61399e+06	2.45854e+06	37.1719	3.29233e+06	3.73876e+06	8.983e+06	5.33803e+06	3.16452e+06	59.2826	4.78335e+06	4.99158e+06	8.61818e+06	6.13104e+06	2.15645e+06	35.1726
P09382	Galectin-1 OS=Homo sapiens GN=LGALS1 PE=1 SV=2 - [LEG1_HUMAN]	FNAHGDANTIVCNSK	[12] DesthioBiotinIAM(new)	-0.0719094	-0.445224	-0.33309	629.647	44.9751	1885.92	3	4.67338	1.09413e+06	1.10213e+06	1.11818e+06	1.19402e+06	1.2815e+06	1.30739e+06	1.18289e+06	93740.5	7.92467	908090	1.21216e+06	1.25589e+06	1.12538e+06	189444	16.8338	767739	869938	968725	868801	100498	11.5674	855305	855736	1.10603e+06	939022	144629	15.4021
Q9BYT8	Neurolysin, mitochondrial OS=Homo sapiens GN=NLN PE=1 SV=1 - [NEUL_HUMAN]	IVHLQETCDLGK	[8] DesthioBiotinIAM(new)	0.099426	0.0554781	-0.332406	551.299	48.9906	1650.87	3	-1.14503	381928	382505	383776	387218	401159	410299	391147	11802.5	3.01741	391477	428820	436867	419055	24219.2	5.77949	344061	427916	447468	406482	54935	13.5148	307895	309640	314426	310653	3381.25	1.08843
Q92805	Golgin subfamily A member 1 OS=Homo sapiens GN=GOLGA1 PE=1 SV=3 - [GOGA1_HUMAN]	QLEQENAALKECR	[12] DesthioBiotinIAM(new)	-0.36747	-0.274469	-0.331491	609.986	43.786	1826.94	3	3.29716	57381.8	57654	63172.2	64449.2	65575.3	76183.5	64069.3	6868.04	10.7197	45088.5	49680.7	54219	49662.7	4565.3	9.1926	38509.8	52961	67438.1	52969.6	14464.1	27.3065	34675.5	57241.9	60833.1	50916.8	14179.6	27.8485
Q9H9Q4	Non-homologous end-joining factor 1 OS=Homo sapiens GN=NHEJ1 PE=1 SV=1 - [NHEJ1_HUMAN]	LTAPPAAFLCHLDNLLRPLLK	[10] DesthioBiotinIAM(new)	-0.811581	-0.884003	-0.331177	653.887	76.7677	2611.52	4	5.7444	195409	274126	331806	353195	357753	461995	329047	89404	27.1706	111098	205509	245824	187477	69149.5	36.8843	111111	173879	249904	178298	69501.9	38.9807	134958	298112	351597	261555	112851	43.1462
Q15003	Condensin complex subunit 2 OS=Homo sapiens GN=NCAPH PE=1 SV=3 - [CND2_HUMAN]	TMCPLLSMKPGEYSYFSPR	[2] Oxidation|[3] DesthioBiotinIAM(new)|[8] Oxidation	-0.405628	-0.506026	-0.330884	845.743	59.3961	2534.21	3	3.0039	2.40887e+06	2.55807e+06	2.88381e+06	5.05788e+06	5.28781e+06	5.6795e+06	3.97932e+06	1.51344e+06	38.0325	1.78819e+06	2.43978e+06	4.78409e+06	3.00402e+06	1.57564e+06	52.451	1.43589e+06	1.52541e+06	5.44494e+06	2.80208e+06	2.28922e+06	81.6972	2.19351e+06	2.58429e+06	4.71347e+06	3.16376e+06	1.35624e+06	42.868
O43353	Receptor-interacting serine/threonine-protein kinase 2 OS=Homo sapiens GN=RIPK2 PE=1 SV=2 - [RIPK2_HUMAN]	LQSVSSAIHLCDKK	[11] DesthioBiotinIAM(new)	-0.124016	-0.0213704	-0.329713	457.008	47.8235	1824	4	4.6254	123036	137149	139566	141553	146736	147960	139333	8995.07	6.45579	125923	125992	131654	127856	3289.26	2.57262	127086	131028	153740	137285	14386.4	10.4792	100169	109734	122697	110867	11306.8	10.1985
P09960	Leukotriene A-4 hydrolase OS=Homo sapiens GN=LTA4H PE=1 SV=2 - [LKHA4_HUMAN]	EHPYLFSQCQAIHCR	[9] DesthioBiotinIAM(new)|[14] Carbamidomethyl	-0.141744	-0.281446	-0.329525	547.019	49.503	2184.05	4	5.8218	101968	104153	107074	111659	114339	119072	109711	6490.72	5.9162	94761.4	99798.6	103773	99444.4	4516.43	4.54166	78684.4	93377.2	98737.5	90266.4	10382.2	11.5017	84378	86641.3	90903.9	87307.8	3313.6	3.79531
P17098	Zinc finger protein 8 OS=Homo sapiens GN=ZNF8 PE=1 SV=2 - [ZNF8_HUMAN]	TTCLFLHLR	[3] DesthioBiotinIAM(new)	-0.363932	-0.204693	-0.329384	467.27	58.3019	1398.79	3	5.06594	82911.8	88248.4	93700.3	119580	123363	127561	105894	19749.1	18.6499	80050.3	81354.7	85447.8	82284.2	2816.26	3.4226	88270.4	92232.8	95156.8	91886.7	3456.23	3.7614	69702.5	72269.8	110863	84278.5	23058.7	27.3602
Q9NRL3	Striatin-4 OS=Homo sapiens GN=STRN4 PE=1 SV=2 - [STRN4_HUMAN]	CTVDGSPHELESR	[1] DesthioBiotinIAM(new)	-0.213011	-0.212868	-0.328281	575.949	43.9609	1724.82	3	5.16979	685660	697241	710848	720240	762388	764015	723399	33002.2	4.56211	602188	622553	647563	624101	22727	3.64155	546367	612433	713689	624163	84275.3	13.5021	528075	546739	653715	576176	67795.8	11.7665
P15153	Ras-related C3 botulinum toxin substrate 2 OS=Homo sapiens GN=RAC2 PE=1 SV=1 - [RAC2_HUMAN]	AVLCPQPTR	[4] DesthioBiotinIAM(new)	-0.277745	-0.129572	-0.328179	640.863	48.165	1279.71	2	2.63342	222197	222511	253313	257932	265155	279380	250081	23217.9	9.28413	195105	195720	228036	206287	18837.3	9.13159	200795	231360	253645	228600	26533.3	11.6068	178922	191695	226984	199200	24894.4	12.4972
O75157	TSC22 domain family protein 2 OS=Homo sapiens GN=TSC22D2 PE=1 SV=3 - [T22D2_HUMAN]	ATDYGPEEVCER	[10] DesthioBiotinIAM(new)	-0.316188	-0.201528	-0.327581	832.887	49.8143	1663.76	2	4.49745	209029	210648	226404	229637	235305	255222	227708	17088.3	7.50452	156680	173198	218799	182892	32173.9	17.5917	159128	191670	243266	198021	42426.7	21.4254	166159	188436	189765	181454	13261.8	7.30866
P60981	Destrin OS=Homo sapiens GN=DSTN PE=1 SV=3 - [DEST_HUMAN]	HFVGMLPEKDCR	[5] Oxidation|[11] DesthioBiotinIAM(new)	-0.314307	-0.530885	-0.32739	581.963	43.0542	1742.87	3	3.72889	2.00505e+06	2.33485e+06	2.48846e+06	2.52296e+06	2.56837e+06	2.70174e+06	2.43691e+06	242650	9.95728	1.64515e+06	1.8631e+06	2.3713e+06	1.95985e+06	372616	19.0125	1.28288e+06	1.65224e+06	2.12485e+06	1.68666e+06	422038	25.0221	1.80624e+06	1.88046e+06	2.13977e+06	1.94216e+06	175111	9.01633
P38405	Guanine nucleotide-binding protein G(olf) subunit alpha OS=Homo sapiens GN=GNAL PE=1 SV=1 - [GNAL_HUMAN]	HYCYPHFTCAVDTENIRR	[3] Carbamidomethyl|[9] DesthioBiotinIAM(new)	-0.0656232	-0.37839	-0.32723	645.308	49.3803	2577.2	4	1.10602	238418	264290	285964	299845	313146	346477	291357	37813.6	12.9785	242648	244885	347670	278401	59998.9	21.5513	212514	226380	233525	224139	10683.3	4.76638	221895	233826	240970	232230	9636.96	4.14974
P26368	Splicing factor U2AF 65 kDa subunit OS=Homo sapiens GN=U2AF2 PE=1 SV=4 - [U2AF2_HUMAN]	YCDPDSYHR	[2] DesthioBiotinIAM(new)	-0.0933008	-0.127402	-0.326454	484.553	41.5868	1450.64	3	4.99327	145683	155941	161471	172623	172991	185424	165689	14169.8	8.55207	118021	171726	176191	155313	32373	20.8438	131125	161805	162123	151685	17805.8	11.7387	122333	133406	140669	132136	9233.76	6.98808
P16435	NADPH--cytochrome P450 reductase OS=Homo sapiens GN=POR PE=1 SV=2 - [NCPR_HUMAN]	RHILAILQDCPSLRPPIDHLCELLPR	[10] DesthioBiotinIAM(new)|[21] Carbamidomethyl	-0.34604	-0.661443	-0.325857	675.181	65.8381	3370.87	5	5.6857	377758	385120	439957	478130	513430	547818	457035	68724.6	15.037	316835	324866	437005	359568	67181.9	18.684	233723	291546	341608	288959	53989	18.684	319466	325706	448730	364634	72895.9	19.9915
Q96R06	Sperm-associated antigen 5 OS=Homo sapiens GN=SPAG5 PE=1 SV=2 - [SPAG5_HUMAN]	DLKETLEFADQENQVAHLELGQVECQLK	[25] DesthioBiotinIAM(new)	-0.0460378	-0.224207	-0.324467	881.704	69.3134	3522.79	4	5.3856	604345	631175	648333	660637	662266	664331	645181	23542.2	3.64893	575433	647613	651707	624918	42903.6	6.86549	537056	551498	568398	552317	15686.8	2.84019	482294	528956	534462	515237	28662.5	5.56297
P28062	Proteasome subunit beta type-8 OS=Homo sapiens GN=PSMB8 PE=1 SV=3 - [PSB8_HUMAN]	VIEINPYLLGTMSGCAADCQYWER	[12] Oxidation|[15] DesthioBiotinIAM(new)|[19] Carbamidomethyl	-0.0285493	-0.507376	-0.324391	1034.49	70.5217	3100.46	3	5.61717	1.00178e+06	1.02169e+06	1.11172e+06	3.02829e+06	3.25466e+06	3.78401e+06	2.20036e+06	1.28965e+06	58.6109	955900	1.2497e+06	4.26613e+06	2.15724e+06	1.83224e+06	84.9346	1.07358e+06	1.45354e+06	2.11674e+06	1.54795e+06	527949	34.1063	1.10238e+06	1.16916e+06	3.0003e+06	1.75728e+06	1.077e+06	61.288
Q9NZB2	Constitutive coactivator of PPAR-gamma-like protein 1 OS=Homo sapiens GN=FAM120A PE=1 SV=2 - [F120A_HUMAN]	TCNTNPHLNALSTDSACR	[2] DesthioBiotinIAM(new)|[17] Carbamidomethyl	-0.226975	-0.11872	-0.321712	757.694	46.7451	2270.06	3	2.93056	1.10508e+06	1.18988e+06	1.22736e+06	1.24555e+06	1.29189e+06	1.33853e+06	1.23305e+06	81260.7	6.59022	987163	1.01883e+06	1.15465e+06	1.05355e+06	88977.4	8.4455	900459	1.20309e+06	1.30339e+06	1.13565e+06	209760	18.4706	874608	979628	1.10553e+06	986588	115618	11.719
Q53GS9	U4/U6.U5 tri-snRNP-associated protein 2 OS=Homo sapiens GN=USP39 PE=1 SV=2 - [SNUT2_HUMAN]	HCPYLDTINR	[2] DesthioBiotinIAM(new)	-0.187821	-0.28733	-0.321348	509.932	50.0628	1526.77	3	5.19228	147488	154371	155311	157052	160082	165199	156584	5931.88	3.78831	125783	136304	150322	137470	12310.7	8.95523	126144	127862	130916	128307	2416.94	1.88371	105337	133331	137284	125317	17416.2	13.8977
Q86V48	Leucine zipper protein 1 OS=Homo sapiens GN=LUZP1 PE=1 SV=2 - [LUZP1_HUMAN]	LRPTRPCAEEN	[7] DesthioBiotinIAM(new)	-0.0129898	-0.07216	-0.321208	527.942	38.4155	1580.8	3	-2.73339	521210	529539	560608	616280	685488	688969	600349	75116.2	12.5121	431394	673332	680178	594968	141701	23.8165	336110	561418	815652	571060	239916	42.0124	420698	490601	530259	480519	55472	11.5442
Q9BWU0	Kanadaptin OS=Homo sapiens GN=SLC4A1AP PE=1 SV=1 - [NADAP_HUMAN]	TTSLCAGPSASKNEYEK	[5] DesthioBiotinIAM(new)	-0.0645377	-0.0212225	-0.3209	694.68	43.4835	2081.02	3	3.89675	732377	758032	769368	778128	781962	832359	775371	33117.3	4.27115	580303	821799	822248	741450	139558	18.8223	738381	739365	814400	764049	43608.1	5.70751	569133	591373	701711	620739	71000.1	11.438
Q04917	14-3-3 protein eta OS=Homo sapiens GN=YWHAH PE=1 SV=4 - [1433F_HUMAN]	NCNDFQYESK	[2] DesthioBiotinIAM(new)	-0.167601	-0.0700433	-0.319913	772.349	48.3618	1542.68	2	4.20297	1.70173e+06	1.72401e+06	1.74421e+06	1.79049e+06	1.80442e+06	1.8384e+06	1.76721e+06	52302.5	2.95961	1.47385e+06	1.60743e+06	1.63889e+06	1.57339e+06	87627.2	5.56934	1.39276e+06	1.67293e+06	1.98469e+06	1.68346e+06	296107	17.5892	1.30046e+06	1.38175e+06	1.56503e+06	1.41574e+06	135523	9.57255
Q8IVT2	Mitotic interactor and substrate of PLK1 OS=Homo sapiens GN=MISP PE=1 SV=1 - [MISP_HUMAN]	LCDLERER	[2] DesthioBiotinIAM(new)	-0.382342	-0.112948	-0.319784	443.905	43.675	1328.69	3	4.92031	112491	119308	139009	156281	168468	182305	146310	27612.2	18.8723	99143.2	107414	130187	112248	16076.7	14.3225	104828	117792	183258	135293	42041.6	31.0746	93804	99950.2	157913	117222	35372.7	30.1757
Q10567	AP-1 complex subunit beta-1 OS=Homo sapiens GN=AP1B1 PE=1 SV=2 - [AP1B1_HUMAN]	DCPLNAEAASSK	[2] DesthioBiotinIAM(new)	-0.119629	-0.261618	-0.319458	751.372	49.9419	1500.73	2	3.60188	971076	978208	1.00066e+06	1.02375e+06	1.05316e+06	1.13137e+06	1.02637e+06	59645.6	5.81132	866918	935209	1.03196e+06	944696	82930.6	8.77854	783876	786209	998362	856149	123166	14.386	750059	843601	873850	822503	64535.9	7.84627
Q8IU81	Interferon regulatory factor 2-binding protein 1 OS=Homo sapiens GN=IRF2BP1 PE=1 SV=1 - [I2BP1_HUMAN]	ERLEDTHFVQCPSVPGHK	[11] DesthioBiotinIAM(new)	-0.390384	-0.413247	-0.319377	594.555	46.9564	2374.19	4	2.89141	220710	225661	260584	268718	270022	271669	252894	23378.8	9.2445	191912	192739	194168	192939	1141.28	0.591521	177384	179157	213176	189906	20172.2	10.6222	145376	191196	271447	202673	63814.3	31.4863
Q13671	Ras and Rab interactor 1 OS=Homo sapiens GN=RIN1 PE=1 SV=4 - [RIN1_HUMAN]	VAYQDPSSGCTSK	[10] DesthioBiotinIAM(new)	-0.410808	-0.267869	-0.318968	819.897	43.675	1637.78	2	4.35503	256249	276320	289976	312170	315750	329246	296618	27416.2	9.24292	200050	229156	240145	223117	20718.4	9.2859	137263	294136	307666	246355	94718.4	38.4479	154182	230481	328684	237782	87479.7	36.7899
Q96HE7	ERO1-like protein alpha OS=Homo sapiens GN=ERO1L PE=1 SV=2 - [ERO1A_HUMAN]	DCAVKPCQSDEVPDGIK	[2] Carbamidomethyl|[7] DesthioBiotinIAM(new)	-0.175071	-0.301821	-0.318794	719.685	49.665	2156.03	3	4.617	1.22039e+06	1.25502e+06	1.26263e+06	1.30137e+06	1.3334e+06	1.3422e+06	1.28584e+06	47858.8	3.722	1.10961e+06	1.11951e+06	1.18756e+06	1.1389e+06	42435.8	3.72605	1.00388e+06	1.02435e+06	1.10109e+06	1.04311e+06	51248.2	4.91304	1.00036e+06	1.02234e+06	1.07002e+06	1.03091e+06	35616.2	3.45484
Q96T37	Putative RNA-binding protein 15 OS=Homo sapiens GN=RBM15 PE=1 SV=2 - [RBM15_HUMAN]	DKENTGVLHAFPPCEFSQQFLDSPAK	[14] DesthioBiotinIAM(new)	-0.148382	-0.335419	-0.318543	801.151	64.3719	3200.58	4	4.83031	540239	572940	608334	614323	618068	691817	607620	50963.9	8.38746	537348	547085	560264	548233	11500.8	2.0978	340255	445286	659174	481572	162527	33.7492	456294	483872	521548	487238	32756.9	6.72298
P49327	Fatty acid synthase OS=Homo sapiens GN=FASN PE=1 SV=3 - [FAS_HUMAN]	RGLKPSCTIIPLMK	[7] DesthioBiotinIAM(new)|[13] Oxidation	-0.123947	-0.449978	-0.318395	623.702	49.7489	1868.08	3	4.76977	497441	502185	503996	661160	689706	708280	593794	102552	17.2706	428764	573712	632253	544910	104757	19.2247	329738	336451	637879	434690	176000	40.4886	401735	484504	542363	476201	70681	14.8427
P61981	14-3-3 protein gamma OS=Homo sapiens GN=YWHAG PE=1 SV=2 - [1433G_HUMAN]	NCSETQYESK	[2] DesthioBiotinIAM(new)	-0.219902	0.00450407	-0.318364	742.84	39.8773	1483.67	2	3.02962	328621	967270	2.75213e+06	3.82157e+06	4.27685e+06	4.51294e+06	2.77656e+06	1.76774e+06	63.6664	306979	2.54047e+06	4.30461e+06	2.38402e+06	2.0034e+06	84.0346	8657.03	3.67679e+06	4.67029e+06	2.78524e+06	2.45537e+06	88.1563	394768	2.9235e+06	3.36197e+06	2.22674e+06	1.60161e+06	71.9263
P62495	Eukaryotic peptide chain release factor subunit 1 OS=Homo sapiens GN=ETF1 PE=1 SV=3 - [ERF1_HUMAN]	KVNIDFEPFKPINTSLYLCDNKFHTEALTALLSDDSK	[19] DesthioBiotinIAM(new)	-0.0756272	-0.575765	-0.317646	905.475	69.5845	4522.34	5	5.93182	1.00659e+06	1.02916e+06	1.0478e+06	1.10587e+06	1.11193e+06	1.20357e+06	1.08415e+06	71923.7	6.6341	807027	1.07142e+06	1.2079e+06	1.02878e+06	203811	19.8109	516556	747614	918002	727391	201485	27.6998	773999	833904	1.00179e+06	869899	118087	13.5748
O75528	Transcriptional adapter 3 OS=Homo sapiens GN=TADA3 PE=1 SV=1 - [TADA3_HUMAN]	KSEAQHEQPEDGCPFGALTQR	[13] DesthioBiotinIAM(new)	-0.0997344	-0.134504	-0.317008	656.823	50.6566	2623.26	4	6.19959	424895	436067	468786	470536	478047	494702	462172	26438.3	5.72043	390958	450396	452550	431301	34954.9	8.10451	359468	443033	460592	421031	54033.4	12.8336	360760	364933	387309	371001	14276.5	3.8481
O75534	Cold shock domain-containing protein E1 OS=Homo sapiens GN=CSDE1 PE=1 SV=2 - [CSDE1_HUMAN]	GDCLQKGESVK	[3] DesthioBiotinIAM(new)	-0.0806158	-0.129076	-0.316959	487.257	38.8872	1458.75	3	-0.929583	442045	448013	528988	581006	612027	639496	541929	83575.8	15.4219	435562	525909	575961	512478	71156.7	13.8848	368356	540467	577825	495549	111725	22.5458	321671	466533	516913	435039	101360	23.2989
Q09666	Neuroblast differentiation-associated protein AHNAK OS=Homo sapiens GN=AHNAK PE=1 SV=2 - [AHNK_HUMAN]	GPFVEAEVPDVDLECPDAK	[15] DesthioBiotinIAM(new)	-0.367499	-0.0906747	-0.316958	1163.57	66.1446	2325.13	2	5.53488	1.16891e+07	1.17742e+07	1.31096e+07	1.32666e+07	1.3918e+07	1.4153e+07	1.29851e+07	1.04641e+06	8.05853	9.36395e+06	9.396e+06	1.14353e+07	1.00651e+07	1.18673e+06	11.7906	7.19859e+06	1.23859e+07	1.69977e+07	1.21941e+07	4.90239e+06	40.203	9.70053e+06	9.8929e+06	1.16783e+07	1.04239e+07	1.0906e+06	10.4625
P63241	Eukaryotic translation initiation factor 5A-1 OS=Homo sapiens GN=EIF5A PE=1 SV=2 - [IF5A1_HUMAN]	KYEDICPSTHNMDVPNIKR	[6] DesthioBiotinIAM(new)|[12] Oxidation	-0.445416	-0.509858	-0.316951	643.825	44.3896	2571.27	4	5.70105	2.33536e+06	2.50188e+06	2.87475e+06	3.06063e+06	3.42028e+06	3.51688e+06	2.95163e+06	477284	16.1702	1.62845e+06	2.23614e+06	2.63819e+06	2.1676e+06	508351	23.4523	1.57053e+06	2.16544e+06	2.48274e+06	2.0729e+06	463090	22.3401	2.3072e+06	2.36644e+06	2.43476e+06	2.36946e+06	63835.1	2.69407
Q9Y224	UPF0568 protein C14orf166 OS=Homo sapiens GN=C14orf166 PE=1 SV=1 - [CN166_HUMAN]	YLRDVNCPFK	[7] DesthioBiotinIAM(new)	-0.165808	-0.403574	-0.315803	517.613	50.7463	1549.82	3	5.45315	915887	934060	935875	958362	993712	1.0233e+06	960200	40858.8	4.25524	803288	824389	940173	855950	73698	8.61008	685201	723511	768973	725895	41937	5.77728	672854	799610	841821	771428	87938	11.3994
P57764	Gasdermin-D OS=Homo sapiens GN=GSDMD PE=1 SV=1 - [GSDMD_HUMAN]	CLHNFLTDGVPAEGAFTEDFQGLRAEVETISK	[1] DesthioBiotinIAM(new)	-0.0900147	-0.0922111	-0.315644	948.478	73.2873	3789.88	4	4.48302	5.38627e+06	5.48917e+06	5.6077e+06	5.68894e+06	5.94547e+06	6.82569e+06	5.82387e+06	526665	9.04321	4.28297e+06	5.67221e+06	6.45964e+06	5.4716e+06	1.10212e+06	20.1425	5.41181e+06	5.47314e+06	5.50489e+06	5.46328e+06	47319.7	0.86614	4.44436e+06	4.60814e+06	4.98581e+06	4.67944e+06	277677	5.93397
P62258	14-3-3 protein epsilon OS=Homo sapiens GN=YWHAE PE=1 SV=1 - [1433E_HUMAN]	LICCDILDVLDKHLIPAANTGESK	[3] Carbamidomethyl|[4] DesthioBiotinIAM(new)	0.45764	-0.305041	-0.31544	978.858	70.4512	2933.55	3	5.37659	207767	212781	226136	266727	276017	279672	244850	32912.9	13.4421	195171	375393	438188	336251	126148	37.5161	175847	204452	214260	198186	19958.4	10.0705	145871	200133	244285	196763	49293.4	25.0522
O95865	N(G),N(G)-dimethylarginine dimethylaminohydrolase 2 OS=Homo sapiens GN=DDAH2 PE=1 SV=1 - [DDAH2_HUMAN]	AMAVLTDHPYASLTLPDDAAADCLFLRPGLPGVPPFLLHR	[2] Oxidation|[23] DesthioBiotinIAM(new)	-0.113238	-0.386182	-0.314387	917.484	74.2824	4582.38	5	-0.535083	441881	452662	506344	510819	590217	667182	528184	86138.1	16.3084	361451	430214	673271	488312	163828	33.5498	326094	327032	559296	404141	134369	33.2481	248559	350863	674863	424762	222552	52.3947
Q9HB07	UPF0160 protein MYG1, mitochondrial OS=Homo sapiens GN=C12orf10 PE=1 SV=2 - [MYG1_HUMAN]	IGTHNGTFHCDEALACALLR	[10] DesthioBiotinIAM(new)|[16] Carbamidomethyl	-0.188833	-0.357391	-0.313963	624.566	57.947	2494.24	4	5.7593	156686	160658	174762	189987	192077	192089	177710	16157.7	9.09221	150692	151569	165462	155908	8286.3	5.31488	126211	143755	146183	138716	10897.8	7.85622	134551	135168	159146	142955	14025	9.81079
P57764	Gasdermin-D OS=Homo sapiens GN=GSDMD PE=1 SV=1 - [GSDMD_HUMAN]	MCALYASLALLSGLSQEPH	[1] Oxidation|[2] DesthioBiotinIAM(new)	-0.213138	0.360225	-0.313336	772.733	79.5905	2315.18	3	5.44017	233457	245706	264403	325183	345436	398193	302063	64742.5	21.4335	193215	197773	390744	260577	112751	43.2696	153861	308665	700682	387736	281855	72.6925	191076	263477	274728	243094	45398.5	18.6753
P35222	Catenin beta-1 OS=Homo sapiens GN=CTNNB1 PE=1 SV=1 - [CTNB1_HUMAN]	NLALCPANHAPLR	[5] DesthioBiotinIAM(new)	0.0634611	-0.222031	-0.313323	562.65	50.7354	1684.93	3	4.30671	302711	305683	309343	316240	325624	329707	314885	10958.5	3.48017	273104	332948	381083	329045	54095.5	16.4402	236377	261849	311679	269969	38302	14.1876	243926	252289	264030	253415	10099.2	3.98525
Q13126	S-methyl-5'-thioadenosine phosphorylase OS=Homo sapiens GN=MTAP PE=1 SV=2 - [MTAP_HUMAN]	TTMRPQSFYDGSHSCAR	[3] Oxidation|[15] DesthioBiotinIAM(new)	-0.447117	-0.289434	-0.313026	564.764	40.928	2255.03	4	3.33325	2.15869e+06	2.34758e+06	2.72521e+06	2.99562e+06	3.00996e+06	3.03363e+06	2.71178e+06	377304	13.9135	1.86442e+06	1.91838e+06	2.18454e+06	1.98911e+06	171379	8.61587	1.81291e+06	1.96952e+06	2.8741e+06	2.21884e+06	572845	25.8173	2.0501e+06	2.0846e+06	2.41387e+06	2.18286e+06	200805	9.19918
Q13228	Selenium-binding protein 1 OS=Homo sapiens GN=SELENBP1 PE=1 SV=2 - [SBP1_HUMAN]	CGNCGPGYSTPLEAMKGPR	[1] DesthioBiotinIAM(new)|[4] Carbamidomethyl|[15] Oxidation	-0.449459	-0.349907	-0.312127	769.698	46.4806	2306.07	3	5.20486	596467	654902	710770	738028	928864	957528	764427	147044	19.2359	536314	563636	579459	559803	21826	3.89888	408429	477303	913655	599796	273983	45.6794	537149	540885	769095	615710	132848	21.5765
P07437	Tubulin beta chain OS=Homo sapiens GN=TUBB PE=1 SV=2 - [TBB5_HUMAN]	EIVHIQAGQCGNQIGAK	[10] DesthioBiotinIAM(new)	-0.184258	0.0690081	-0.311935	1031.55	48.7871	2061.08	2	2.28696	1.28558e+06	1.38631e+06	1.47066e+06	1.63963e+06	1.74995e+06	1.75455e+06	1.54778e+06	196384	12.6881	1.11062e+06	1.43303e+06	1.54296e+06	1.3622e+06	224702	16.4955	1.27701e+06	1.75128e+06	1.84255e+06	1.62361e+06	303618	18.7001	811403	1.0871e+06	1.84199e+06	1.24683e+06	533536	42.7914
P62241	40S ribosomal protein S8 OS=Homo sapiens GN=RPS8 PE=1 SV=2 - [RS8_HUMAN]	LLACIASRPGQCGR	[4] Carbamidomethyl|[12] DesthioBiotinIAM(new)	0.169635	-0.352774	-0.311433	599.993	47.92	1796.96	3	4.26512	2.45299e+06	2.49492e+06	2.7449e+06	2.83332e+06	2.90371e+06	2.90444e+06	2.72238e+06	201571	7.4042	2.87099e+06	3.09962e+06	3.21558e+06	3.06206e+06	175339	5.72616	2.09657e+06	2.1336e+06	2.16533e+06	2.13183e+06	34412.7	1.61423	1.78602e+06	2.02378e+06	2.77161e+06	2.19381e+06	514322	23.4443
Q9UBU9	Nuclear RNA export factor 1 OS=Homo sapiens GN=NXF1 PE=1 SV=1 - [NXF1_HUMAN]	SCMAATLR	[2] DesthioBiotinIAM(new)	-0.147272	-0.208846	-0.311372	574.802	49.0185	1147.59	2	4.51716	74688.7	83589.3	102694	106198	122420	137960	104592	23548.9	22.5151	77689.7	95199.1	110436	94441.7	16386.4	17.3508	74632.6	77905.7	118949	90495.7	24695.5	27.2891	60638.6	78088.3	114137	84287.8	27282.5	32.3682
P04075	Fructose-bisphosphate aldolase A OS=Homo sapiens GN=ALDOA PE=1 SV=2 - [ALDOA_HUMAN]	ALANSLACQGK	[8] DesthioBiotinIAM(new)	-0.282455	-0.188624	-0.311288	686.377	48.2592	1370.74	2	4.15121	1.2548e+07	1.29365e+07	1.31773e+07	1.41138e+07	1.4508e+07	1.57275e+07	1.38352e+07	1.1839e+06	8.55721	1.10229e+07	1.1172e+07	1.19304e+07	1.13751e+07	486651	4.27819	1.16084e+07	1.21714e+07	1.26389e+07	1.21396e+07	515978	4.25038	9.89125e+06	1.12127e+07	1.23462e+07	1.11501e+07	1.2287e+06	11.0196
Q5JSZ5	Protein PRRC2B OS=Homo sapiens GN=PRRC2B PE=1 SV=2 - [PRC2B_HUMAN]	GRPAGGNGSGLCGGGVLGAR	[12] DesthioBiotinIAM(new)	-0.211561	0.0238416	-0.310955	670.356	47.9144	2008.05	3	4.00603	84340.1	87031	91818.4	94082.7	100933	102012	93369.7	7162.9	7.67155	61971.1	88952.2	90979.6	80634.3	16194.5	20.0839	76285.3	90960.6	117531	94925.5	20906.5	22.0242	63458.1	79536.2	82803.8	75266	10355.7	13.7588
Q9P0J6	39S ribosomal protein L36, mitochondrial OS=Homo sapiens GN=MRPL36 PE=2 SV=1 - [RM36_HUMAN]	CKDCYLVK	[1] DesthioBiotinIAM(new)|[4] Carbamidomethyl	-0.16958	-0.091736	-0.310211	442.232	43.7683	1323.67	3	4.48262	209181	218283	222779	226559	228607	234741	223358	8881.82	3.97649	197277	198222	200265	198588	1527.11	0.768983	191170	194450	243174	209598	29124.3	13.8953	169122	181352	189957	180144	10469.7	5.81185
P07900	Heat shock protein HSP 90-alpha OS=Homo sapiens GN=HSP90AA1 PE=1 SV=5 - [HS90A_HUMAN]	KHGLEVIYMIEPIDEYCVQQLK	[9] Oxidation|[17] DesthioBiotinIAM(new)	-0.130525	-0.390985	-0.309275	740.891	62.7168	2959.53	4	5.10416	1.34614e+06	1.43834e+06	1.50037e+06	1.88906e+06	1.94725e+06	2.16426e+06	1.71424e+06	330072	19.2548	1.1646e+06	1.29463e+06	2.23864e+06	1.56595e+06	586176	37.4325	786367	971259	2.16425e+06	1.30729e+06	747883	57.2085	1.12594e+06	1.30514e+06	1.71933e+06	1.38347e+06	304354	21.9993
Q8IWS0	PHD finger protein 6 OS=Homo sapiens GN=PHF6 PE=1 SV=1 - [PHF6_HUMAN]	CGFCHVGEEENEAR	[1] DesthioBiotinIAM(new)|[4] Carbamidomethyl	-0.201633	-0.269578	-0.308894	644.951	45.0285	1931.83	3	2.35175	182992	185849	186305	188379	205284	209406	193036	11292	5.84971	161741	169420	172411	167857	5503.73	3.27882	153232	159641	167533	160135	7163.52	4.47342	138368	157742	171379	155830	16588.3	10.6451
P49748	Very long-chain specific acyl-CoA dehydrogenase, mitochondrial OS=Homo sapiens GN=ACADVL PE=1 SV=1 - [ACADV_HUMAN]	TSAVPSPCGK	[8] DesthioBiotinIAM(new)	-0.236684	-0.501827	-0.308823	621.832	45.0686	1241.65	2	4.06101	993099	1.00414e+06	1.06714e+06	1.08405e+06	1.12437e+06	1.1835e+06	1.07605e+06	72216.9	6.71129	867838	874345	997532	913238	73072.6	8.00148	719887	769137	790738	759921	36313.3	4.77856	847841	852535	905714	868696	32143.5	3.7002
Q9H9F9	Actin-related protein 5 OS=Homo sapiens GN=ACTR5 PE=1 SV=2 - [ARP5_HUMAN]	CPDYYENNVHK	[1] DesthioBiotinIAM(new)	-0.129399	-0.0168522	-0.308111	559.931	43.5696	1676.77	3	4.95167	1.08507e+06	1.10434e+06	1.10504e+06	1.11741e+06	1.13932e+06	1.15789e+06	1.11818e+06	26401.2	2.36109	902535	1.05659e+06	1.10762e+06	1.02225e+06	106771	10.4447	982991	1.13282e+06	1.19976e+06	1.10519e+06	110995	10.0431	859036	916905	933508	903150	39095.2	4.32876
Q9BVS4	Serine/threonine-protein kinase RIO2 OS=Homo sapiens GN=RIOK2 PE=1 SV=2 - [RIOK2_HUMAN]	VQGGVPAGSDEYEDECPHLIALSSLNR	[16] DesthioBiotinIAM(new)	-0.145271	-0.272473	-0.308064	1051.52	62.0072	3151.54	3	5.48088	502545	540217	579209	582125	616442	649287	578304	52342.3	9.051	511680	514428	542617	522908	17123.6	3.27469	370644	421156	644534	478778	145754	30.4429	432099	456329	512904	467111	41467.3	8.87741
Q9NPD3	Exosome complex component RRP41 OS=Homo sapiens GN=EXOSC4 PE=1 SV=3 - [EXOS4_HUMAN]	SCEMGLQLR	[2] DesthioBiotinIAM(new)|[4] Oxidation	-0.123355	-0.504405	-0.307599	674.84	50.537	1347.67	2	1.83486	2.65045e+06	2.68159e+06	2.74827e+06	2.84293e+06	3.27184e+06	3.28384e+06	2.91315e+06	290110	9.95863	2.09257e+06	2.76983e+06	3.16087e+06	2.67442e+06	540504	20.2101	1.72317e+06	1.80682e+06	2.63089e+06	2.05363e+06	501672	24.4285	2.31629e+06	2.32677e+06	2.41829e+06	2.35378e+06	56112.6	2.38393
Q15181	Inorganic pyrophosphatase OS=Homo sapiens GN=PPA1 PE=1 SV=2 - [IPYR_HUMAN]	HTGCCGDNDPIDVCEIGSK	[4] DesthioBiotinIAM(new)|[5] Carbamidomethyl|[14] Carbamidomethyl	0.0250792	-0.163362	-0.307195	791.684	51.5266	2372.03	3	4.67495	1.08168e+06	1.12766e+06	1.15292e+06	1.17519e+06	1.18918e+06	1.29975e+06	1.17106e+06	73633.8	6.28777	1.095e+06	1.17672e+06	1.30307e+06	1.1916e+06	104830	8.79747	903635	1.00115e+06	1.23229e+06	1.04569e+06	168794	16.1419	908320	962039	969042	946467	33221.5	3.51005
P54105	Methylosome subunit pICln OS=Homo sapiens GN=CLNS1A PE=1 SV=1 - [ICLN_HUMAN]	SDCLGEHLYVMVNAK	[3] DesthioBiotinIAM(new)	-0.386174	-0.170542	-0.306247	659.001	60.0637	1973.98	3	5.78673	34285.1	34300.4	38505.7	99957.3	113789	136004	76140.2	45797.6	60.149	34982.7	39576.5	100218	58259.1	36410.1	62.4969	29261.7	42208.5	131483	67651.2	55658	82.272	28646.9	39996.1	116090	61577.8	47549.1	77.2179
P60903	Protein S100-A10 OS=Homo sapiens GN=S100A10 PE=1 SV=2 - [S10AA_HUMAN]	IMKDLDQCR	[2] Oxidation|[8] DesthioBiotinIAM(new)	-0.290332	-0.704711	-0.305675	478.582	39.3404	1432.72	3	4.89761	2.45477e+06	2.77547e+06	3.37356e+06	3.95801e+06	4.13305e+06	4.17929e+06	3.47902e+06	735222	21.133	1.88777e+06	3.17937e+06	3.4674e+06	2.84485e+06	841275	29.5719	90844.3	2.79135e+06	3.52164e+06	2.13461e+06	1.80722e+06	84.663	2.49396e+06	2.59914e+06	3.35116e+06	2.81475e+06	467513	16.6094
P49411	Elongation factor Tu, mitochondrial OS=Homo sapiens GN=TUFM PE=1 SV=2 - [EFTU_HUMAN]	KGDECELLGHSK	[5] DesthioBiotinIAM(new)	-0.12466	-0.436569	-0.305136	537.945	42.1307	1610.81	3	2.79663	1.18028e+06	1.37808e+06	1.43207e+06	1.53954e+06	1.54092e+06	1.57016e+06	1.44018e+06	147231	10.2232	1.20357e+06	1.34653e+06	1.41278e+06	1.32096e+06	106922	8.09428	919015	1.09949e+06	1.17389e+06	1.06413e+06	131064	12.3165	808422	1.25574e+06	1.43272e+06	1.16563e+06	321758	27.6038
Q9C0C9	Ubiquitin-conjugating enzyme E2 O OS=Homo sapiens GN=UBE2O PE=1 SV=3 - [UBE2O_HUMAN]	IMSCSPDTQCSR	[2] Oxidation|[4] Carbamidomethyl|[10] DesthioBiotinIAM(new)	-0.0262115	-1.11017	-0.304918	848.879	40.8739	1695.74	2	3.5732	234444	250579	286491	307837	354700	360049	299017	52108.1	17.4265	244471	270568	365860	293633	63896.4	21.7606	879.76	173094	241577	138517	124018	89.5327	0	238020	488131	242051	244090	100.843
O75380	NADH dehydrogenase [ubiquinone] iron-sulfur protein 6, mitochondrial OS=Homo sapiens GN=NDUFS6 PE=1 SV=1 - [NDUS6_HUMAN]	VIACDGGGGALGHPK	[4] DesthioBiotinIAM(new)	-0.230914	-0.229834	-0.304369	549.961	43.9721	1646.86	3	2.79503	231353	233150	234448	235519	246871	261478	240470	11660.2	4.84893	163122	225174	226414	204903	36188.9	17.6615	194501	205566	215103	205057	10310.4	5.02806	162628	208271	213297	194732	27916.1	14.3357
Q8IWJ2	GRIP and coiled-coil domain-containing protein 2 OS=Homo sapiens GN=GCC2 PE=1 SV=4 - [GCC2_HUMAN]	QFCYTVEQHNR	[3] DesthioBiotinIAM(new)	-0.0116074	-0.0147028	-0.30383	574.278	46.9787	1719.81	3	-1.75756	327161	331044	348277	359529	446972	571398	397397	95829.6	24.1143	325571	332646	524420	394212	112819	28.6188	300158	373184	506760	393367	104769	26.634	278071	283754	403966	321931	71101.9	22.0861
P49327	Fatty acid synthase OS=Homo sapiens GN=FASN PE=1 SV=3 - [FAS_HUMAN]	LGMLSPEGTCK	[3] Oxidation|[10] DesthioBiotinIAM(new)	-0.0374391	-0.617201	-0.303574	724.371	48.6691	1446.73	2	4.84249	1.9421e+06	1.9452e+06	2.02048e+06	2.41909e+06	2.61085e+06	2.63579e+06	2.26225e+06	330795	14.6224	1.5153e+06	2.50838e+06	2.58922e+06	2.2043e+06	598060	27.1315	914580	1.10412e+06	2.40582e+06	1.47484e+06	811803	55.0434	1.51932e+06	1.78386e+06	2.19574e+06	1.83297e+06	340872	18.5966
P13489	Ribonuclease inhibitor OS=Homo sapiens GN=RNH1 PE=1 SV=2 - [RINI_HUMAN]	CKDISSALR	[1] DesthioBiotinIAM(new)	-0.304757	-0.351715	-0.303275	430.241	45.5057	1287.7	3	3.3396	168275	182158	182571	189798	189880	194721	184567	9315.73	5.04734	122564	161341	164360	149422	23308	15.5988	130939	139596	163375	144637	16795.1	11.6119	136554	154617	157554	149575	11371.7	7.60267
Q9HAV7	GrpE protein homolog 1, mitochondrial OS=Homo sapiens GN=GRPEL1 PE=1 SV=2 - [GRPE1_HUMAN]	ATQCVPKEEIKDDNPHLK	[4] DesthioBiotinIAM(new)	-0.0896725	0.0291322	-0.303247	473.053	41.1079	2360.23	5	5.07823	1.65673e+06	1.68845e+06	1.69581e+06	1.78265e+06	1.8427e+06	1.85881e+06	1.75419e+06	85809.5	4.89168	1.22353e+06	1.83357e+06	1.88833e+06	1.64848e+06	369030	22.3861	1.59355e+06	1.7198e+06	2.05658e+06	1.78998e+06	239359	13.3722	1.35391e+06	1.4518e+06	1.45922e+06	1.42164e+06	58777.7	4.13449
Q9BXS6	Nucleolar and spindle-associated protein 1 OS=Homo sapiens GN=NUSAP1 PE=1 SV=1 - [NUSAP_HUMAN]	SCGPASQSTLGLK	[2] DesthioBiotinIAM(new)	-0.257386	-0.129353	-0.302789	772.912	50.0335	1543.81	2	4.73419	338084	400423	409199	415612	417551	432506	402229	33157.2	8.24335	334713	335437	339367	336506	2504.37	0.744228	352881	356508	393815	367735	22658.7	6.16169	312246	330731	335266	326081	12194.2	3.73963
A6NMY6	Putative annexin A2-like protein OS=Homo sapiens GN=ANXA2P2 PE=5 SV=2 - [AXA2L_HUMAN]	GLGTDEDSLIEIICSR	[14] DesthioBiotinIAM(new)	0.212931	-0.16783	-0.301778	1009.02	73.657	2016.03	2	5.19809	1.00277e+06	1.16149e+06	1.1808e+06	1.21025e+06	1.21135e+06	1.25185e+06	1.16975e+06	87387.3	7.47058	1.04467e+06	1.3786e+06	1.64411e+06	1.35579e+06	300371	22.1547	822252	1.0469e+06	1.25472e+06	1.04129e+06	216289	20.7712	905836	953311	987745	948964	41127.2	4.3339
P21980	Protein-glutamine gamma-glutamyltransferase 2 OS=Homo sapiens GN=TGM2 PE=1 SV=2 - [TGM2_HUMAN]	SEGTYCCGPVPVR	[6] DesthioBiotinIAM(new)|[7] Carbamidomethyl	-0.272327	-0.220279	-0.301649	860.915	51.164	1719.82	2	4.62142	2.59914e+06	2.61819e+06	2.77163e+06	2.90132e+06	2.93167e+06	2.95754e+06	2.79658e+06	159094	5.68888	2.21557e+06	2.26556e+06	2.46543e+06	2.31552e+06	132208	5.70963	2.23558e+06	2.48265e+06	2.48352e+06	2.40058e+06	142896	5.95256	2.13583e+06	2.2324e+06	2.43858e+06	2.26893e+06	154643	6.81568
Q92817	Envoplakin OS=Homo sapiens GN=EVPL PE=1 SV=3 - [EVPL_HUMAN]	ELLEQQTCVLR	[8] DesthioBiotinIAM(new)	-0.275759	-0.388522	-0.301118	814.45	57.5787	1626.88	2	5.2043	201058	219338	221089	241444	249898	265812	233107	23589	10.1194	182502	194365	200782	192550	9274.25	4.81655	172071	180578	181569	178073	5221.29	2.93211	183973	185122	198489	189195	8069.57	4.26522
P11413	Glucose-6-phosphate 1-dehydrogenase OS=Homo sapiens GN=G6PD PE=1 SV=4 - [G6PD_HUMAN]	LILDVFCGSQMHFVR	[7] DesthioBiotinIAM(new)|[11] Oxidation	-0.186751	-0.565546	-0.2982	693.033	64.5175	2076.08	3	5.39874	1.39457e+06	1.44466e+06	1.73413e+06	2.01399e+06	2.03087e+06	2.28092e+06	1.81652e+06	353191	19.4432	1.09319e+06	1.49256e+06	2.20214e+06	1.59596e+06	561663	35.1927	784962	877947	2.01936e+06	1.22742e+06	687411	56.0044	1.1938e+06	1.51209e+06	1.72605e+06	1.47732e+06	267824	18.1291
Q13263	Transcription intermediary factor 1-beta OS=Homo sapiens GN=TRIM28 PE=1 SV=5 - [TIF1B_HUMAN]	DCQLNAHKDHQYQFLEDAVR	[2] DesthioBiotinIAM(new)	-0.00666287	-0.31208	-0.298091	682.336	52.3548	2725.32	4	4.38961	1.87565e+06	2.00446e+06	2.03384e+06	2.11791e+06	2.24897e+06	2.36092e+06	2.10696e+06	175579	8.33327	1.76946e+06	2.03975e+06	2.48254e+06	2.09725e+06	359997	17.1652	1.35447e+06	1.72396e+06	2.01291e+06	1.69711e+06	330039	19.4471	1.63035e+06	1.7282e+06	1.7824e+06	1.71365e+06	77064.1	4.49708
Q969E4	Transcription elongation factor A protein-like 3 OS=Homo sapiens GN=TCEAL3 PE=1 SV=1 - [TCAL3_HUMAN]	TECEGKREDEGEPGDEGQLEDEGSQEK	[3] DesthioBiotinIAM(new)	-0.270637	0.247225	-0.297594	819.86	40.6028	3275.41	4	2.5523	444581	490322	498577	524812	535546	589883	513953	48901.7	9.51481	283821	467068	527242	426043	126790	29.7599	574630	581772	673666	610023	55232.2	9.05412	346808	450065	457597	418157	61904.1	14.804
P45880	Voltage-dependent anion-selective channel protein 2 OS=Homo sapiens GN=VDAC2 PE=1 SV=2 - [VDAC2_HUMAN]	TKSCSGVEFSTSGSSNTDTGK	[4] DesthioBiotinIAM(new)	-0.12245	-0.167911	-0.297548	792.706	43.9875	2375.1	3	2.57819	397992	417655	425812	429788	446666	464306	430370	23014.4	5.34758	354410	403901	427737	395349	37404.3	9.46108	366512	369744	413001	383085	25957.7	6.77595	335400	338885	376206	350164	22620.8	6.46006
P17844	Probable ATP-dependent RNA helicase DDX5 OS=Homo sapiens GN=DDX5 PE=1 SV=1 - [DDX5_HUMAN]	GHNCPKPVLNFYEANFPANVMDVIAR	[4] DesthioBiotinIAM(new)|[21] Oxidation	-0.348345	-0.220352	-0.297404	807.911	64.061	3227.62	4	4.81421	2.20685e+06	2.39889e+06	2.48309e+06	2.7149e+06	3.46264e+06	3.64319e+06	2.81826e+06	594718	21.1023	1.92845e+06	1.96601e+06	2.74664e+06	2.2137e+06	461922	20.8665	1.59841e+06	1.79346e+06	3.86535e+06	2.41907e+06	1.2563e+06	51.9333	1.80106e+06	2.51669e+06	2.56204e+06	2.29326e+06	426863	18.6138
Q9UNF0	Protein kinase C and casein kinase substrate in neurons protein 2 OS=Homo sapiens GN=PACSIN2 PE=1 SV=2 - [PACN2_HUMAN]	LCSDLMNCLHER	[2] DesthioBiotinIAM(new)|[6] Oxidation|[8] Carbamidomethyl	-0.0827015	-0.310226	-0.296599	601.618	48.7311	1801.83	3	3.03381	648779	751736	907345	1.07922e+06	1.33616e+06	1.33634e+06	1.00993e+06	291681	28.8813	665092	955960	1.23994e+06	953664	287431	30.1396	500960	551110	1.3915e+06	814524	500305	61.4231	569856	825222	1.07168e+06	822253	250926	30.5168
Q27J81	Inverted formin-2 OS=Homo sapiens GN=INF2 PE=1 SV=2 - [INF2_HUMAN]	CPASEPGLDATTASESR	[1] DesthioBiotinIAM(new)	-0.241553	-0.145539	-0.296542	994.478	49.2779	1986.94	2	5.17455	912339	939588	992608	994344	1.00134e+06	1.01626e+06	976081	40630.5	4.16262	746756	849617	880435	825603	70000.3	8.47869	769379	909272	968603	882418	102291	11.5921	746817	801724	835638	794727	44822.1	5.63994
Q92841	Probable ATP-dependent RNA helicase DDX17 OS=Homo sapiens GN=DDX17 PE=1 SV=2 - [DDX17_HUMAN]	TTSSANNPNLMYQDECDRR	[11] Oxidation|[16] DesthioBiotinIAM(new)	-0.219461	-0.358833	-0.296476	843.051	44.1316	2526.13	3	3.22562	2.60005e+06	2.6141e+06	3.3093e+06	3.75782e+06	3.9867e+06	4.65983e+06	3.48797e+06	809787	23.2166	2.60214e+06	3.17239e+06	3.21277e+06	2.99577e+06	341486	11.399	1.48343e+06	2.18048e+06	4.49579e+06	2.7199e+06	1.57697e+06	57.9788	2.36863e+06	2.46227e+06	3.68921e+06	2.84004e+06	736893	25.9466
Q15149	Plectin OS=Homo sapiens GN=PLEC PE=1 SV=3 - [PLEC_HUMAN]	LLEAQACTGGIIDPSTGERFPVTDAVNK	[7] DesthioBiotinIAM(new)	-0.0983339	-0.379291	-0.296115	1066.89	61.7351	3197.66	3	5.6269	1.29059e+06	1.33107e+06	1.44365e+06	1.48196e+06	1.4982e+06	1.60565e+06	1.44185e+06	115561	8.01476	1.10836e+06	1.30114e+06	1.63105e+06	1.34685e+06	264329	19.6257	1.03205e+06	1.05825e+06	1.23526e+06	1.10852e+06	110538	9.97169	1.16181e+06	1.17718e+06	1.18393e+06	1.17431e+06	11335.2	0.965271
P23528	Cofilin-1 OS=Homo sapiens GN=CFL1 PE=1 SV=3 - [COF1_HUMAN]	KAVLFCLSEDKK	[6] DesthioBiotinIAM(new)	-0.0778448	-0.0334206	-0.295988	559.655	50.0267	1675.94	3	5.50512	1.12018e+06	1.12935e+06	1.13002e+06	1.13863e+06	1.1706e+06	1.19148e+06	1.14671e+06	28013.5	2.44295	1.04123e+06	1.07836e+06	1.13983e+06	1.08648e+06	49794.4	4.58311	1.05544e+06	1.11862e+06	1.18729e+06	1.12045e+06	65944.9	5.88557	901656	949099	951279	934011	28041.8	3.0023
Q13409	Cytoplasmic dynein 1 intermediate chain 2 OS=Homo sapiens GN=DYNC1I2 PE=1 SV=3 - [DC1I2_HUMAN]	TPLSAAAHTHPVYCVNVVGTQNAHNLISISTDGK	[14] DesthioBiotinIAM(new)	-0.477791	-0.562649	-0.295791	763.2	57.0543	3810.97	5	4.62715	511432	567301	583495	595437	617992	648029	587281	46619.1	7.93812	384536	414554	466048	421713	41224.7	9.77554	353420	375844	463605	397623	58231.3	14.6449	397686	441588	595969	478414	104145	21.7688
Q96F86	Enhancer of mRNA-decapping protein 3 OS=Homo sapiens GN=EDC3 PE=1 SV=1 - [EDC3_HUMAN]	SQDVAVSPQQQQCSK	[13] DesthioBiotinIAM(new)	-0.326351	-0.0111968	-0.295419	643.657	42.658	1927.95	3	3.73282	388744	394443	424499	439404	467498	491794	434397	40481.4	9.31899	296305	371293	371764	346454	43431.1	12.5359	412422	421870	458824	431039	24522.3	5.68911	337843	340611	383432	353962	25559.6	7.22099
P53582	Methionine aminopeptidase 1 OS=Homo sapiens GN=METAP1 PE=1 SV=2 - [MAP11_HUMAN]	LGIQGSYFCSQECFK	[9] Carbamidomethyl|[13] DesthioBiotinIAM(new)	-0.134708	-0.117152	-0.295405	688.333	61.8779	2061.98	3	5.78813	2.68581e+06	2.77806e+06	2.78556e+06	2.80276e+06	2.89614e+06	2.93027e+06	2.8131e+06	88226.9	3.13629	2.45018e+06	2.55349e+06	2.68331e+06	2.56232e+06	116816	4.559	2.55764e+06	2.60675e+06	2.6167e+06	2.5937e+06	31617.7	1.21902	2.18467e+06	2.31908e+06	2.37297e+06	2.29224e+06	96977.9	4.23071
P62873	Guanine nucleotide-binding protein G(I)/G(S)/G(T) subunit beta-1 OS=Homo sapiens GN=GNB1 PE=1 SV=3 - [GBB1_HUMAN]	ADQELMTYSHDNIICGITSVSFSK	[6] Oxidation|[15] DesthioBiotinIAM(new)	-0.193454	-0.244838	-0.295212	991.148	64.3211	2970.42	3	4.04109	2.52144e+06	2.81632e+06	2.82644e+06	4.04209e+06	4.12083e+06	4.80911e+06	3.52271e+06	923977	26.2292	2.44222e+06	2.90628e+06	3.89342e+06	3.08064e+06	741147	24.0582	1.37288e+06	2.24116e+06	5.30452e+06	2.97285e+06	2.06543e+06	69.4763	2.59993e+06	2.82524e+06	3.18734e+06	2.87084e+06	296349	10.3227
P62280	40S ribosomal protein S11 OS=Homo sapiens GN=RPS11 PE=1 SV=3 - [RS11_HUMAN]	NMSVHLSPCFR	[2] Oxidation|[9] DesthioBiotinIAM(new)	0.0105056	-0.757426	-0.294618	534.937	50.0003	1601.79	3	5.1346	623320	625115	978823	1.07111e+06	1.09568e+06	1.12302e+06	919510	233815	25.4282	685124	911331	1.18223e+06	926230	248890	26.8713	431051	551377	649382	543937	109355	20.1044	580393	814059	854545	749665	147986	19.7402
O60437	Periplakin OS=Homo sapiens GN=PPL PE=1 SV=4 - [PEPL_HUMAN]	ICANSQQYQQAVK	[2] DesthioBiotinIAM(new)	-0.468136	-0.176496	-0.294402	888.96	45.6603	1775.91	2	3.70816	139092	142011	163146	163641	178480	190698	162845	20095.8	12.3404	113233	118900	121027	117720	4028.49	3.42209	127274	151725	153280	144093	14586.4	10.1229	124699	130114	143542	132785	9701.23	7.30595
Q9NZB2	Constitutive coactivator of PPAR-gamma-like protein 1 OS=Homo sapiens GN=FAM120A PE=1 SV=2 - [F120A_HUMAN]	TCNTNPHLNALSTDSACRR	[2] DesthioBiotinIAM(new)|[17] Carbamidomethyl	-0.158714	0.0264179	-0.294386	607.548	43.3064	2426.16	4	4.23123	1.91022e+06	1.96152e+06	2.00882e+06	2.0498e+06	2.05359e+06	2.1089e+06	2.01548e+06	71263.7	3.53582	1.65121e+06	1.71992e+06	2.0454e+06	1.80551e+06	210572	11.6627	1.93667e+06	2.10418e+06	2.11732e+06	2.05272e+06	100721	4.90672	1.54393e+06	1.69162e+06	1.69483e+06	1.64346e+06	86207.4	5.24549
P62873	Guanine nucleotide-binding protein G(I)/G(S)/G(T) subunit beta-1 OS=Homo sapiens GN=GNB1 PE=1 SV=3 - [GBB1_HUMAN]	ELAGHTGYLSCCR	[11] Carbamidomethyl|[12] DesthioBiotinIAM(new)	-0.12098	-0.305951	-0.294124	588.286	46.7362	1761.84	3	4.42637	347243	354719	358877	382842	382969	384873	368587	16837	4.56798	300297	336618	379902	338939	39853.2	11.7582	261751	306393	326316	298154	33061.7	11.0888	288210	295707	317906	300608	15442.5	5.13709
O76094	Signal recognition particle subunit SRP72 OS=Homo sapiens GN=SRP72 PE=1 SV=3 - [SRP72_HUMAN]	ILQINKDDVTALHCK	[14] DesthioBiotinIAM(new)	-0.0657301	-0.00604957	-0.294066	502.535	50.9145	2006.11	4	5.86469	145679	146265	158429	167535	169348	169989	159541	11303.9	7.08525	133763	159637	163905	152435	16310.7	10.7001	121475	171050	184096	158873	33038.5	20.7955	125709	131908	132747	130122	3844.66	2.95467
Q13490	Baculoviral IAP repeat-containing protein 2 OS=Homo sapiens GN=BIRC2 PE=1 SV=2 - [BIRC2_HUMAN]	MKYDFSCELYR	[1] Oxidation|[7] DesthioBiotinIAM(new)	-0.368257	-0.410169	-0.293785	589.616	54.0395	1765.83	3	5.30745	372476	425047	529230	548331	574501	588005	506265	87327.6	17.2494	323788	377719	475130	392212	76704.6	19.5569	285777	318318	538852	380982	137684	36.1392	373828	389416	475726	412990	54887.3	13.2902
P48681	Nestin OS=Homo sapiens GN=NES PE=1 SV=2 - [NEST_HUMAN]	TLENQSHETLERENQECPR	[17] DesthioBiotinIAM(new)	-0.222742	0.062242	-0.292858	653.067	40.9117	2608.24	4	4.00866	520524	525505	542429	542462	550889	562538	540725	15651.1	2.89447	327732	513513	548853	463366	118784	25.6351	526291	580918	586481	564563	33261.5	5.89154	430785	438679	454688	441384	12179	2.75928
P13489	Ribonuclease inhibitor OS=Homo sapiens GN=RNH1 PE=1 SV=2 - [RINI_HUMAN]	LDDCGLTEAR	[4] DesthioBiotinIAM(new)	-0.217648	-0.254534	-0.292804	694.849	51.5322	1387.68	2	4.70924	639514	669341	679692	685225	686566	737928	683044	32010.2	4.6864	559097	586568	616520	587395	28720.1	4.88941	454430	515022	748250	572567	155133	27.0942	535411	543059	594266	557579	32001.2	5.73932
P14923	Junction plakoglobin OS=Homo sapiens GN=JUP PE=1 SV=3 - [PLAK_HUMAN]	EAMCPGVSGEDSSLLLATQVEGQATNLQR	[3] Oxidation|[4] DesthioBiotinIAM(new)	-0.156879	-0.541797	-0.292623	1106.21	66.7068	3315.62	3	4.52776	1.20796e+06	1.23516e+06	1.29049e+06	1.42626e+06	1.62607e+06	1.63284e+06	1.40313e+06	190786	13.5972	1.01509e+06	1.36323e+06	1.39736e+06	1.25856e+06	211540	16.8081	423767	693737	1.77399e+06	963830	714484	74.1296	1.08508e+06	1.09845e+06	1.25309e+06	1.14554e+06	93381	8.15172
P43246	DNA mismatch repair protein Msh2 OS=Homo sapiens GN=MSH2 PE=1 SV=1 - [MSH2_HUMAN]	KCYLER	[2] DesthioBiotinIAM(new)	-0.258976	0.0528071	-0.292429	554.304	42.9246	1106.59	2	3.43195	233533	241749	258384	300525	322622	330858	281278	42199.9	15.0029	218760	238717	247699	235059	14812	6.30141	282123	292598	300573	291765	9252.78	3.17132	211821	226623	250569	229671	19552.8	8.51339
P62191	26S protease regulatory subunit 4 OS=Homo sapiens GN=PSMC1 PE=1 SV=1 - [PRS4_HUMAN]	TKGPDAASKLPLVTPHTQCR	[19] DesthioBiotinIAM(new)	-0.195814	-0.216237	-0.292122	484.071	45.3632	2415.32	5	6.17868	129351	131720	136423	139790	145312	147825	138403	7334	5.299	106663	125999	129850	120837	12425.6	10.2829	89315.9	116377	151723	119139	31295.3	26.2679	99046.6	114655	125401	113034	13251.7	11.7236
Q99832	T-complex protein 1 subunit eta OS=Homo sapiens GN=CCT7 PE=1 SV=2 - [TCPH_HUMAN]	CAMTALSSK	[1] DesthioBiotinIAM(new)|[3] Oxidation	-0.300586	-0.561555	-0.291696	612.31	41.8057	1222.61	2	0.296401	293455	375368	380302	465343	471303	500394	414361	78156.2	18.8619	271007	344202	394077	336429	61902.5	18.3999	180213	285839	376225	280759	98104.6	34.9427	271874	311406	432245	338508	83549.8	24.6817
P31942	Heterogeneous nuclear ribonucleoprotein H3 OS=Homo sapiens GN=HNRNPH3 PE=1 SV=2 - [HNRH3_HUMAN]	LRGLPFGCSK	[8] DesthioBiotinIAM(new)	0.0707831	0.0841337	-0.291335	458.597	52.7216	1372.77	3	4.10862	63667.3	64177.6	64682.7	64890.1	65214.2	68235.7	65144.6	1609.66	2.47091	64199.7	68931.9	72130	68420.5	3989.81	5.83131	53129.1	71533.8	82506.9	69056.6	14844.8	21.4965	50515.2	53034	56148.7	53232.6	2822.01	5.30128
Q9HCC0	Methylcrotonoyl-CoA carboxylase beta chain, mitochondrial OS=Homo sapiens GN=MCCC2 PE=1 SV=1 - [MCCB_HUMAN]	KGTHFVQLCCQR	[9] Carbamidomethyl|[10] DesthioBiotinIAM(new)	-0.192376	-0.124336	-0.29125	443.984	43.4538	1771.91	4	5.74114	224581	225011	237287	249757	250219	252427	239880	12835.6	5.35083	169292	225438	235073	209934	35525.7	16.9223	211964	216119	232134	220072	10650.6	4.83961	179161	203111	205814	196029	14670.1	7.48368
O60493	Sorting nexin-3 OS=Homo sapiens GN=SNX3 PE=1 SV=3 - [SNX3_HUMAN]	CLHMFLQDEIIDK	[1] DesthioBiotinIAM(new)|[4] Oxidation	-0.101682	-0.378865	-0.291107	639.662	57.9627	1915.96	3	5.23042	220857	236542	240849	253906	295767	297284	257534	31997.7	12.4246	189834	227862	302328	240008	57222.3	23.8418	138964	162239	292961	198055	83010.7	41.913	188884	214746	227798	210476	19805.6	9.40989
A0JLT2	Mediator of RNA polymerase II transcription subunit 19 OS=Homo sapiens GN=MED19 PE=1 SV=2 - [MED19_HUMAN]	LHTGPLPEQCR	[10] DesthioBiotinIAM(new)	-0.217395	-0.18528	-0.290921	516.279	44.1161	1545.81	3	3.36099	176407	178598	180524	185637	188296	196325	184298	7368.06	3.99791	157514	158309	159730	158518	1122.42	0.708075	154398	164810	167049	162086	6751.01	4.16508	148111	150901	152913	150641	2411.52	1.60083
Q9NWU1	3-oxoacyl-[acyl-carrier-protein] synthase, mitochondrial OS=Homo sapiens GN=OXSM PE=1 SV=1 - [OXSM_HUMAN]	LKGPNHAVSTACTTGAHAVGDSFR	[12] DesthioBiotinIAM(new)	-0.386472	-0.061088	-0.290897	674.098	43.5976	2692.36	4	4.39103	2.16417e+06	2.19124e+06	2.30704e+06	2.62375e+06	3.10591e+06	3.50835e+06	2.65008e+06	549439	20.733	1.91293e+06	1.9194e+06	2.24958e+06	2.0273e+06	192524	9.49655	1.53051e+06	2.57781e+06	3.5123e+06	2.54021e+06	991434	39.0296	1.56896e+06	1.80953e+06	3.11998e+06	2.16616e+06	834752	38.5361
P27707	Deoxycytidine kinase OS=Homo sapiens GN=DCK PE=1 SV=1 - [DCK_HUMAN]	SCPSFSASSEGTR	[2] DesthioBiotinIAM(new)	-0.279675	-0.279105	-0.290559	806.378	47.9144	1610.74	2	3.66421	1.9452e+06	1.98599e+06	2.07819e+06	2.07997e+06	2.11703e+06	2.17991e+06	2.06438e+06	85907	4.1614	1.65497e+06	1.71635e+06	1.73045e+06	1.70059e+06	40134	2.36001	1.58449e+06	1.65915e+06	1.86014e+06	1.70126e+06	142568	8.38012	1.58216e+06	1.71211e+06	1.76915e+06	1.68781e+06	95832.6	5.67794
P04083	Annexin A1 OS=Homo sapiens GN=ANXA1 PE=1 SV=2 - [ANXA1_HUMAN]	CATSKPAFFAEK	[1] DesthioBiotinIAM(new)	-0.21926	-0.429065	-0.290167	532.616	48.4382	1594.82	3	4.4789	2.41124e+06	2.52308e+06	2.7148e+06	2.78186e+06	2.8236e+06	3.02363e+06	2.71303e+06	219360	8.08541	2.1221e+06	2.34538e+06	2.52406e+06	2.33051e+06	201389	8.6414	1.89901e+06	2.07228e+06	2.07397e+06	2.01509e+06	100529	4.98882	2.04279e+06	2.27599e+06	2.33744e+06	2.21874e+06	155447	7.00611
P09496	Clathrin light chain A OS=Homo sapiens GN=CLTA PE=1 SV=1 - [CLCA_HUMAN]	LCDFNPK	[2] DesthioBiotinIAM(new)	-0.165784	-0.227947	-0.28948	566.797	50.2044	1131.58	2	4.78451	1.09309e+06	1.12895e+06	1.16504e+06	1.22741e+06	1.28353e+06	1.33549e+06	1.20558e+06	93378.8	7.74553	1.02454e+06	1.05197e+06	1.14762e+06	1.07471e+06	64612.3	6.01207	932283	1.00524e+06	1.15064e+06	1.02939e+06	111161	10.7988	869149	1.0194e+06	1.07067e+06	986405	104732	10.6176
Q9UGI8	Testin OS=Homo sapiens GN=TES PE=1 SV=1 - [TES_HUMAN]	CLIGQK	[1] DesthioBiotinIAM(new)	-0.095958	-0.110583	-0.287828	479.283	48.5853	956.551	2	3.72252	667586	671216	683057	729802	761525	796129	718219	53082.6	7.39087	555359	663963	796685	672002	120864	17.9856	553796	703834	738043	665224	98003.5	14.7324	555138	600113	609702	588318	29131.5	4.95166
P14923	Junction plakoglobin OS=Homo sapiens GN=JUP PE=1 SV=3 - [PLAK_HUMAN]	CTTSILHNLSHHR	[1] DesthioBiotinIAM(new)	-0.257502	-0.0915233	-0.287594	605.654	42.6415	1813.94	3	1.96869	220286	223853	224411	240352	247846	249886	234439	13162.4	5.61442	180502	194799	213048	196116	16312.7	8.31789	187260	236255	236569	220028	28378.2	12.8975	154823	204074	217308	192068	32927.3	17.1435
Q00839	Heterogeneous nuclear ribonucleoprotein U OS=Homo sapiens GN=HNRNPU PE=1 SV=6 - [HNRPU_HUMAN]	AVVVCPKDEDYK	[5] DesthioBiotinIAM(new)	-0.249764	-0.387911	-0.287576	554.626	45.5975	1660.86	3	4.35811	436729	438448	456103	473121	473390	508969	464460	27023.1	5.81817	352917	408391	410571	390627	32675.4	8.36487	344821	356580	363469	354957	9429.84	2.65662	305038	415267	421259	380522	65439	17.1972
O75390	Citrate synthase, mitochondrial OS=Homo sapiens GN=CS PE=1 SV=2 - [CISY_HUMAN]	LPCVAAK	[3] DesthioBiotinIAM(new)	-0.444181	-0.327254	-0.287399	499.299	47.5224	996.584	2	4.59827	972168	985243	990961	1.05384e+06	1.08578e+06	1.10257e+06	1.03176e+06	56213.5	5.44831	690248	781896	802892	758345	59901.5	7.89897	759088	766816	941196	822367	102982	12.5226	754614	837292	944300	845402	95102.9	11.2494
Q96C19	EF-hand domain-containing protein D2 OS=Homo sapiens GN=EFHD2 PE=1 SV=1 - [EFHD2_HUMAN]	RLQMEGEGGGETPEQPGLNGAAAAAAGAPDEAAEALGSADCELSAK	[4] Oxidation|[41] DesthioBiotinIAM(new)	-0.457722	-0.300208	-0.286312	1170.81	63.6893	4679.19	4	4.63688	5.60282e+06	7.42574e+06	7.75719e+06	8.25319e+06	1.00641e+07	1.07299e+07	8.30549e+06	1.86292e+06	22.43	5.58728e+06	6.00387e+06	6.55142e+06	6.04752e+06	483550	7.99584	3.66224e+06	4.61471e+06	1.19586e+07	6.74518e+06	4.53999e+06	67.3072	4.98787e+06	6.27783e+06	9.16569e+06	6.81047e+06	2.13923e+06	31.411
Q6PJ69	Tripartite motif-containing protein 65 OS=Homo sapiens GN=TRIM65 PE=1 SV=3 - [TRI65_HUMAN]	LCGLLLEEGSHPGAPAKPVDLAPVEAPGPLAPVPSTVCPLR	[2] Carbamidomethyl|[38] DesthioBiotinIAM(new)	0.038872	-0.204041	-0.28564	1106.1	67.3009	4420.38	4	2.25757	2.46575e+06	2.48026e+06	2.56197e+06	2.67763e+06	2.71811e+06	2.73172e+06	2.60591e+06	119100	4.57039	2.48438e+06	2.62831e+06	2.91854e+06	2.67707e+06	221149	8.26085	1.81981e+06	2.36616e+06	2.60071e+06	2.26223e+06	400694	17.7124	1.97211e+06	2.03986e+06	2.40152e+06	2.13783e+06	230863	10.799
P07814	Bifunctional glutamate/proline--tRNA ligase OS=Homo sapiens GN=EPRS PE=1 SV=5 - [SYEP_HUMAN]	TGNKYNVYPTYDFACPIVDSIEGVTHALR	[15] DesthioBiotinIAM(new)	0.0211871	-0.0359637	-0.285214	885.698	73.1587	3538.76	4	2.36634	4.28902e+06	4.43053e+06	4.4744e+06	4.70925e+06	4.77049e+06	4.98452e+06	4.6097e+06	256710	5.5689	4.27913e+06	4.68963e+06	5.06493e+06	4.6779e+06	393031	8.40186	4.3028e+06	4.33778e+06	4.84805e+06	4.49621e+06	305204	6.78802	3.71169e+06	3.77435e+06	3.86241e+06	3.78281e+06	75716.7	2.0016
Q96IY1	Kinetochore-associated protein NSL1 homolog OS=Homo sapiens GN=NSL1 PE=1 SV=3 - [NSL1_HUMAN]	IHQEVFSSCHR	[9] DesthioBiotinIAM(new)	-0.146781	0.16365	-0.284297	410.461	40.1964	1637.82	4	3.69371	91175.1	93198.7	95641.8	97059.9	100828	104329	97038.7	4870.04	5.01866	60689.9	91897.8	110367	87651.5	25109.2	28.6467	106569	109475	110040	108695	1862.2	1.71324	38902.5	95106.8	105038	79682.5	35663.9	44.7576
Q6WCQ1	Myosin phosphatase Rho-interacting protein OS=Homo sapiens GN=MPRIP PE=1 SV=3 - [MPRIP_HUMAN]	SSCSFETCPRPTEK	[3] Carbamidomethyl|[8] DesthioBiotinIAM(new)	-0.17084	-0.0562506	-0.283963	642.302	43.9335	1923.88	3	1.54639	528895	532618	539379	588012	615631	645708	575041	49011.3	8.52311	471372	503466	557631	510823	43597.5	8.53476	537924	551726	569504	553051	15831.9	2.86264	432749	475440	508709	472299	38077.5	8.06215
Q9ULW0	Targeting protein for Xklp2 OS=Homo sapiens GN=TPX2 PE=1 SV=2 - [TPX2_HUMAN]	ICRDPQTPVLQTK	[2] DesthioBiotinIAM(new)	-0.340801	-0.1087	-0.283948	599.004	45.8312	1793.99	3	4.26719	358209	365381	372203	374459	389487	415468	379201	20611.8	5.43559	268566	296974	332715	299418	32144.6	10.7357	299459	360411	395171	351680	48449.8	13.7767	268884	322664	342812	311453	38217.5	12.2707
P50990	T-complex protein 1 subunit theta OS=Homo sapiens GN=CCT8 PE=1 SV=4 - [TCPQ_HUMAN]	IAVYSCPFDGMITETK	[6] DesthioBiotinIAM(new)|[11] Oxidation	-0.236648	-0.54625	-0.283821	1044.02	61.6567	2086.02	2	4.85662	7.42437e+06	8.34669e+06	8.98841e+06	1.10172e+07	1.13796e+07	1.18202e+07	9.82942e+06	1.81478e+06	18.4628	6.03644e+06	8.59074e+06	1.03999e+07	8.34237e+06	2.19233e+06	26.2795	4.12642e+06	4.88783e+06	1.11792e+07	6.73116e+06	3.87091e+06	57.5073	6.69882e+06	7.11068e+06	1.04125e+07	8.074e+06	2.03565e+06	25.2124
Q05639	Elongation factor 1-alpha 2 OS=Homo sapiens GN=EEF1A2 PE=1 SV=1 - [EF1A2_HUMAN]	SDPPQEAAQFTSQVIILNHPGQISAGYSPVIDCHTAHIACK	[33] Carbamidomethyl|[40] DesthioBiotinIAM(new)	-0.131662	-0.240627	-0.283385	940.276	62.7954	4696.34	5	5.60344	7.60801e+06	7.84426e+06	7.95982e+06	7.98606e+06	8.44317e+06	8.60269e+06	8.074e+06	375897	4.65564	6.99718e+06	7.20766e+06	7.90449e+06	7.36978e+06	474883	6.44366	6.27286e+06	6.51269e+06	7.71541e+06	6.83365e+06	772982	11.3114	5.94182e+06	6.7539e+06	7.20655e+06	6.63409e+06	640819	9.65949
Q92817	Envoplakin OS=Homo sapiens GN=EVPL PE=1 SV=3 - [EVPL_HUMAN]	QVCAGQYGPGMAELEQQIAEHNILQK	[3] DesthioBiotinIAM(new)|[11] Oxidation	-0.516635	-0.304691	-0.2832	1056.53	61.8779	3166.58	3	6.7775	1.62974e+06	1.83833e+06	2.20983e+06	2.42266e+06	3.10272e+06	3.28536e+06	2.41478e+06	666606	27.6053	1.4808e+06	1.5637e+06	2.01929e+06	1.68793e+06	289947	17.1777	1.15122e+06	1.16761e+06	3.54629e+06	1.95504e+06	1.37809e+06	70.4892	1.55167e+06	1.7013e+06	2.70017e+06	1.98438e+06	624391	31.4653
Q99459	Cell division cycle 5-like protein OS=Homo sapiens GN=CDC5L PE=1 SV=2 - [CDC5L_HUMAN]	RLECLKEDVQR	[4] DesthioBiotinIAM(new)	-0.0734565	0.157336	-0.283111	562.313	42.7511	1683.92	3	3.97501	289825	342704	355138	355516	389179	396561	354821	38195.8	10.7648	285875	311471	414274	337207	67958.1	20.1532	381571	393947	411598	395705	15090.7	3.81361	244305	303599	326888	291598	42579.7	14.6022
O60341	Lysine-specific histone demethylase 1A OS=Homo sapiens GN=KDM1A PE=1 SV=2 - [KDM1A_HUMAN]	CPLYEANGQAVPK	[1] DesthioBiotinIAM(new)	-0.247922	-0.36071	-0.282747	843.439	51.4933	1684.86	2	2.13533	457526	476947	488911	501770	525267	529731	496692	27993.8	5.63605	359542	415068	480196	418268	60390.8	14.4383	311180	326458	522805	386815	118019	30.5104	392360	403237	429281	408293	18972.6	4.64681
Q4V328	GRIP1-associated protein 1 OS=Homo sapiens GN=GRIPAP1 PE=1 SV=1 - [GRAP1_HUMAN]	VKHLEVSSASMAEDLCRK	[11] Oxidation|[16] DesthioBiotinIAM(new)	-0.419356	-0.425477	-0.282652	579.553	42.3052	2314.18	4	2.44135	203454	253794	297911	303487	303717	313856	279370	42719.7	15.2915	164197	213227	249280	208901	42705.9	20.4431	140912	178055	305084	208017	86089.6	41.3859	208910	223120	256962	229664	24685.4	10.7485
Q9H0W8	Protein SMG9 OS=Homo sapiens GN=SMG9 PE=1 SV=1 - [SMG9_HUMAN]	REDFCPR	[5] DesthioBiotinIAM(new)	-0.000273748	-0.389162	-0.282628	406.874	42.5637	1217.6	3	3.29365	69124.4	70527.5	71885.5	76158.7	77298.9	77318.5	73718.9	3643.69	4.94268	68116.2	75194.5	77804.2	73704.9	5012.83	6.80121	44620.2	58849.6	65399.6	56289.8	10623.6	18.873	56457.5	57307.4	68046.3	60603.8	6459.45	10.6585
Q14160	Protein scribble homolog OS=Homo sapiens GN=SCRIB PE=1 SV=4 - [SCRIB_HUMAN]	RSEACPCQPDSGSPLPAEEEK	[5] DesthioBiotinIAM(new)|[7] Carbamidomethyl	-0.122766	-0.145907	-0.282295	861.735	45.8819	2582.18	3	3.38554	407007	479693	499795	502012	502205	541765	488746	44840.7	9.17465	342084	484216	520330	448877	94231.4	20.9927	397198	456412	471592	441734	39309	8.89878	380162	392037	433463	401887	27982.2	6.9627
Q9BSH5	Haloacid dehalogenase-like hydrolase domain-containing protein 3 OS=Homo sapiens GN=HDHD3 PE=1 SV=1 - [HDHD3_HUMAN]	EHILPSLAHLLPALDCLEGSTPGL	[16] DesthioBiotinIAM(new)	-0.123966	-0.0639352	-0.282213	931.51	79.2453	2791.51	3	4.92502	1.42806e+06	1.60123e+06	1.67985e+06	1.79e+06	1.94571e+06	2.02938e+06	1.7457e+06	222955	12.7716	1.5303e+06	1.5396e+06	1.73599e+06	1.60197e+06	116165	7.25139	1.13919e+06	1.8504e+06	2.0205e+06	1.67003e+06	467523	27.9949	1.19408e+06	1.26305e+06	1.8495e+06	1.43554e+06	360148	25.0879
P50440	Glycine amidinotransferase, mitochondrial OS=Homo sapiens GN=GATM PE=1 SV=1 - [GATM_HUMAN]	NSCAADDKATEPLPK	[3] DesthioBiotinIAM(new)	-0.202527	-0.209171	-0.281999	619.312	42.8614	1854.91	3	-0.380949	1.01128e+06	1.14959e+06	1.18516e+06	1.25899e+06	1.28862e+06	1.28936e+06	1.19717e+06	107376	8.96917	1.00364e+06	1.03802e+06	1.07944e+06	1.04037e+06	37955	3.64822	945795	1.07327e+06	1.0877e+06	1.03559e+06	78097.6	7.54138	936825	939864	1.07714e+06	984609	80147.2	8.14
Q96EP5	DAZ-associated protein 1 OS=Homo sapiens GN=DAZAP1 PE=1 SV=1 - [DAZP1_HUMAN]	FKDPNCVGTVLASRPHTLDGR	[6] DesthioBiotinIAM(new)	-0.269619	-0.348957	-0.281369	645.596	50.2784	2578.36	4	4.64981	842645	868573	896147	1.00237e+06	1.04417e+06	1.1745e+06	971401	126742	13.0473	713327	772040	932076	805815	113218	14.0501	661548	772438	854106	762697	96648.1	12.6719	614895	772089	1.01085e+06	799279	199373	24.9442
O43169	Cytochrome b5 type B OS=Homo sapiens GN=CYB5B PE=1 SV=2 - [CYB5B_HUMAN]	QYYIGDIHPSDLKPESGSKDPSKNDTCK	[27] DesthioBiotinIAM(new)	-0.208989	0.14603	-0.281036	684.54	47.2258	3417.67	5	4.10442	365596	416931	447055	466219	556958	592873	474272	85798.8	18.0906	204045	411057	615836	410313	205897	50.1804	454435	541693	578246	524792	63612.5	12.1215	232853	330625	607499	390325	194327	49.786
Q5MNZ6	WD repeat domain phosphoinositide-interacting protein 3 OS=Homo sapiens GN=WDR45B PE=2 SV=2 - [WIPI3_HUMAN]	CNYLALVGGGKKPK	[1] DesthioBiotinIAM(new)	-0.0501612	0.144477	-0.280873	436.756	49.9261	1742.99	4	4.61314	808948	828342	844193	847070	856232	869321	842351	21249.6	2.52266	790088	790507	860105	813567	40304	4.95399	881032	903670	1.00853e+06	931076	68022.5	7.30579	639645	709123	731232	693333	47791.4	6.89299
Q15004	PCNA-associated factor OS=Homo sapiens GN=KIAA0101 PE=1 SV=1 - [PAF15_HUMAN]	YAGGNPVCVRPTPK	[8] DesthioBiotinIAM(new)	-0.360453	-0.00828101	-0.280699	585.653	44.4174	1753.94	3	3.66797	454478	498065	527861	536970	559134	564086	523432	41299.7	7.89018	361499	426403	435234	407712	40264.4	9.87569	438757	550003	572549	520437	71629.2	13.7633	382673	445706	464277	430885	42772.9	9.92675
Q9NYL9	Tropomodulin-3 OS=Homo sapiens GN=TMOD3 PE=1 SV=1 - [TMOD3_HUMAN]	FCNIMGSSNGVDQEHFSNVVK	[2] DesthioBiotinIAM(new)|[5] Oxidation	-0.0988936	-0.297841	-0.280546	875.417	52.8088	2623.23	3	4.8734	3.02876e+06	3.69537e+06	5.38336e+06	5.7866e+06	6.1725e+06	7.33557e+06	5.23369e+06	1.60347e+06	30.6374	4.27207e+06	4.34471e+06	6.04408e+06	4.88695e+06	1.00276e+06	20.5192	2.47156e+06	2.48011e+06	7.82067e+06	4.25745e+06	3.08584e+06	72.4811	3.22747e+06	3.43867e+06	6.26022e+06	4.30879e+06	1.69329e+06	39.2984
Q9NPH0	Lysophosphatidic acid phosphatase type 6 OS=Homo sapiens GN=ACP6 PE=1 SV=2 - [PPA6_HUMAN]	MGIDSSDKVDFFILLDNVAAEQAHNLPSCPMLKR	[1] Oxidation|[29] DesthioBiotinIAM(new)|[31] Oxidation	-0.286199	-0.794398	-0.279863	821.417	71.7383	4102.05	5	3.7369	1.38978e+06	1.57185e+06	1.6158e+06	2.80981e+06	3.05563e+06	3.62708e+06	2.34499e+06	938797	40.0341	1.27189e+06	1.35406e+06	3.14315e+06	1.92303e+06	1.05745e+06	54.9888	681357	700499	2.6744e+06	1.35208e+06	1.1452e+06	84.6986	1.09713e+06	1.30021e+06	3.39715e+06	1.9315e+06	1.27335e+06	65.9255
Q9H0U9	Testis-specific Y-encoded-like protein 1 OS=Homo sapiens GN=TSPYL1 PE=1 SV=3 - [TSYL1_HUMAN]	CATVSAAVAER	[1] DesthioBiotinIAM(new)	-0.352574	-0.261838	-0.279699	687.366	47.4612	1372.72	2	2.68125	96520.2	98625.7	105788	107086	108765	111162	104658	5813.13	5.55441	72870.5	77345.4	95684	81966.6	12088.4	14.748	82238	88262.2	91361.9	87287.4	4639.39	5.31508	84750.2	84826.7	89063.1	86213.3	2468.25	2.86296
P62879	Guanine nucleotide-binding protein G(I)/G(S)/G(T) subunit beta-2 OS=Homo sapiens GN=GNB2 PE=1 SV=3 - [GBB2_HUMAN]	ELPGHTGYLSCCR	[11] Carbamidomethyl|[12] DesthioBiotinIAM(new)	-0.141246	-0.30392	-0.279418	596.958	48.5853	1787.85	3	4.37916	685619	701858	702117	705330	792851	884045	745303	78003.5	10.466	597767	689856	739756	675793	72031.3	10.6588	547182	588626	675386	603732	65423.2	10.8365	598198	613900	630120	614073	15961.7	2.59932
Q9C0D5	Protein TANC1 OS=Homo sapiens GN=TANC1 PE=1 SV=3 - [TANC1_HUMAN]	LQCGENGPAHPLPSK	[3] DesthioBiotinIAM(new)	-0.25114	-0.0809507	-0.27866	615.321	42.9862	1842.94	3	-0.167169	155365	157396	160651	181865	194129	208790	176366	22113.1	12.5382	143877	148834	151854	148188	4027.84	2.71806	139699	165790	194739	166742	27532.3	16.5119	95999.7	135667	204498	145388	54898.4	37.7598
Q14493	Histone RNA hairpin-binding protein OS=Homo sapiens GN=SLBP PE=1 SV=1 - [SLBP_HUMAN]	CDGDASPPSPAR	[1] DesthioBiotinIAM(new)	-0.195187	-0.218889	-0.27806	734.849	42.7362	1467.68	2	4.0906	113589	114655	116295	118042	121551	134456	119765	7723.62	6.44899	101043	105767	107019	104610	3151.84	3.01295	68417.7	118426	121872	102905	29916.7	29.0721	60702.3	117022	118585	98769.9	32976.8	33.3875
Q96F86	Enhancer of mRNA-decapping protein 3 OS=Homo sapiens GN=EDC3 PE=1 SV=1 - [EDC3_HUMAN]	IYLCDIGIPQQVFQEVGINYHSPFGCK	[4] Carbamidomethyl|[26] DesthioBiotinIAM(new)	0.055849	-0.0215981	-0.278015	1141.25	75.7321	3420.72	3	6.18644	7.93063e+06	8.57484e+06	8.70122e+06	9.0221e+06	9.08775e+06	9.99521e+06	8.88529e+06	683117	7.68818	8.00346e+06	9.17281e+06	1.05317e+07	9.236e+06	1.26532e+06	13.6999	5.51223e+06	9.29599e+06	1.14516e+07	8.75326e+06	3.00664e+06	34.3487	5.98594e+06	6.58702e+06	9.4108e+06	7.32792e+06	1.82869e+06	24.9551
Q6WKZ4	Rab11 family-interacting protein 1 OS=Homo sapiens GN=RAB11FIP1 PE=1 SV=3 - [RFIP1_HUMAN]	SNVCINGNHVYLEQPEAK	[4] DesthioBiotinIAM(new)	-0.15678	0.105738	-0.277666	771.059	50.9677	2310.15	3	5.29792	3.24307e+06	3.25667e+06	3.26777e+06	3.75346e+06	3.80564e+06	3.90585e+06	3.53874e+06	313853	8.86905	2.97565e+06	3.10227e+06	3.44511e+06	3.17434e+06	242887	7.65157	3.37083e+06	3.64517e+06	4.40754e+06	3.80785e+06	537158	14.1066	2.88499e+06	2.89039e+06	2.98222e+06	2.9192e+06	54645	1.87192
Q96AE4	Far upstream element-binding protein 1 OS=Homo sapiens GN=FUBP1 PE=1 SV=3 - [FUBP1_HUMAN]	CQHAAEIITDLLR	[1] DesthioBiotinIAM(new)	0.146666	0.115861	-0.277338	593.66	63.9126	1777.96	3	3.9865	365824	386756	392489	392551	420627	427843	397682	22907.3	5.76022	413979	434952	471779	440237	29260.2	6.64647	417118	431946	443745	430936	13342.4	3.09615	325064	325132	334199	328132	5254.79	1.60143
Q86SX6	Glutaredoxin-related protein 5, mitochondrial OS=Homo sapiens GN=GLRX5 PE=1 SV=2 - [GLRX5_HUMAN]	GTPEQPQCGFSNAVVQILR	[8] DesthioBiotinIAM(new)	-0.0903509	-0.167682	-0.277162	780.746	67.9994	2339.22	3	4.30043	1.6495e+06	1.70661e+06	1.81065e+06	1.84536e+06	1.86602e+06	1.95173e+06	1.80498e+06	110250	6.10811	1.56827e+06	1.73323e+06	1.78472e+06	1.69541e+06	113073	6.66936	1.23698e+06	1.7411e+06	1.84269e+06	1.60692e+06	324379	20.1863	1.46102e+06	1.47225e+06	1.53521e+06	1.48949e+06	39989.1	2.68475
P08559	Pyruvate dehydrogenase E1 component subunit alpha, somatic form, mitochondrial OS=Homo sapiens GN=PDHA1 PE=1 SV=3 - [ODPA_HUMAN]	VDGMDILCVR	[4] Oxidation|[8] DesthioBiotinIAM(new)	-0.0816272	-0.385502	-0.277061	716.871	58.9918	1431.73	2	3.9522	159421	159905	164952	186321	193944	219325	180645	23799.6	13.1748	146621	178058	187444	170708	21381.5	12.5252	95380	102608	216870	138286	68151.4	49.283	115027	133772	198443	149081	43764.6	29.3563
P82979	SAP domain-containing ribonucleoprotein OS=Homo sapiens GN=SARNP PE=1 SV=3 - [SARNP_HUMAN]	LAELKQECLAR	[8] DesthioBiotinIAM(new)	-0.214546	0.0996101	-0.276572	523.967	47.3115	1568.88	3	4.65813	309883	310700	312303	319309	319656	322512	315727	5393.66	1.70833	248303	254900	313094	272099	35655.8	13.104	322525	345310	347055	338297	13686.4	4.04568	254303	257313	270331	260649	8518.63	3.26824
Q9NS87	Kinesin-like protein KIF15 OS=Homo sapiens GN=KIF15 PE=1 SV=1 - [KIF15_HUMAN]	AQKEPCLFANTEK	[6] DesthioBiotinIAM(new)	-0.118359	-0.145837	-0.276368	592.313	49.5582	1773.92	3	5.792	604924	630118	637114	641130	663696	691190	644695	29621.5	4.59465	572320	585099	624328	593916	27101.6	4.5632	540793	595381	611958	582711	37236.3	6.39019	480441	549424	567046	532304	45770.6	8.59859
Q9Y6W5	Wiskott-Aldrich syndrome protein family member 2 OS=Homo sapiens GN=WASF2 PE=1 SV=3 - [WASF2_HUMAN]	SELECVTNITLANVIR	[5] DesthioBiotinIAM(new)	-0.0759902	-0.226539	-0.276353	691.048	70.5656	2070.12	3	4.04594	1.24759e+06	1.30598e+06	1.31465e+06	1.37468e+06	1.38562e+06	1.39279e+06	1.33688e+06	57185.7	4.27753	1.09496e+06	1.32804e+06	1.38187e+06	1.26829e+06	152501	12.0242	1.10703e+06	1.1475e+06	1.1733e+06	1.14261e+06	33405	2.92356	1.0244e+06	1.1115e+06	1.17559e+06	1.10383e+06	75885.8	6.87476
Q9BS26	Endoplasmic reticulum resident protein 44 OS=Homo sapiens GN=ERP44 PE=1 SV=1 - [ERP44_HUMAN]	VDCDQHSDIAQR	[3] DesthioBiotinIAM(new)	0.00483271	-0.472947	-0.276188	561.604	39.7777	1681.79	3	4.2214	274969	338869	346464	357443	368188	368322	342376	35040.5	10.2345	251817	352413	426345	343525	87603	25.5012	36811.5	328888	374337	246679	183166	74.2526	259434	285248	303489	282724	22135.7	7.82943
P07900	Heat shock protein HSP 90-alpha OS=Homo sapiens GN=HSP90AA1 PE=1 SV=5 - [HS90A_HUMAN]	HGLEVIYMIEPIDEYCVQQLK	[8] Oxidation|[16] DesthioBiotinIAM(new)	-0.0725665	-0.265663	-0.275916	944.817	67.3009	2831.43	3	1.88562	5.61467e+06	5.71383e+06	6.02796e+06	6.1954e+06	6.41806e+06	6.79884e+06	6.12813e+06	443569	7.23825	5.36155e+06	5.45646e+06	6.66451e+06	5.82751e+06	726419	12.4653	3.66523e+06	4.99324e+06	6.63396e+06	5.09748e+06	1.48711e+06	29.1734	4.67901e+06	5.02399e+06	5.48113e+06	5.06138e+06	402364	7.94969
Q9NPD8	Ubiquitin-conjugating enzyme E2 T OS=Homo sapiens GN=UBE2T PE=1 SV=1 - [UBE2T_HUMAN]	ICLDVLK	[2] DesthioBiotinIAM(new)	-0.301837	-0.242571	-0.275422	550.333	60.9699	1098.65	2	4.53421	76350.4	85631.8	86867.3	89985.8	90605.9	97470.9	87818.7	6969.09	7.93577	67405.5	73089.9	73225.2	71240.2	3321.65	4.66261	59368.2	81362.2	81952.6	74227.7	12872.1	17.3413	69134.5	73086.8	75448.4	72556.5	3190.16	4.39679
Q96S59	Ran-binding protein 9 OS=Homo sapiens GN=RANBP9 PE=1 SV=1 - [RANB9_HUMAN]	QLCGGSQAAIER	[3] DesthioBiotinIAM(new)	-0.421829	-0.196589	-0.275422	764.902	46.5609	1527.79	2	3.82538	119087	125876	129909	135936	142873	144825	133084	9997.58	7.51222	67766.1	112055	118213	99344.5	27520.5	27.702	111938	114092	122363	116131	5503.16	4.73875	97317.5	113088	119460	109955	11399	10.367
Q9Y478	5'-AMP-activated protein kinase subunit beta-1 OS=Homo sapiens GN=PRKAB1 PE=1 SV=4 - [AAKB1_HUMAN]	DTGISCDPALLPEPNHVMLNHLYALSIK	[6] DesthioBiotinIAM(new)|[18] Oxidation	-0.587054	-0.250373	-0.274582	844.192	66.1134	3372.74	4	4.807	551751	623599	802865	803727	899653	902716	764052	145255	19.0111	409391	423829	692670	508630	159547	31.368	448322	527560	951087	642323	270317	42.0842	486474	610873	797555	631634	156576	24.7891
Q9HBM1	Kinetochore protein Spc25 OS=Homo sapiens GN=SPC25 PE=1 SV=1 - [SPC25_HUMAN]	STDTSCQMAGLR	[6] DesthioBiotinIAM(new)	-0.596515	0.0462082	-0.274581	783.377	50.1259	1564.74	2	4.06027	51936.2	56093.2	57454.3	63283.8	113497	114963	76204.6	29681.3	38.9495	42884.5	51365.9	56943.3	50397.9	7079.2	14.0466	53611.9	59261.6	123181	78684.9	38638.3	49.1051	50077.2	50443.6	88471.9	62997.6	22062.2	35.0207
P00558	Phosphoglycerate kinase 1 OS=Homo sapiens GN=PGK1 PE=1 SV=3 - [PGK1_HUMAN]	ACANPAAGSVILLENLR	[2] DesthioBiotinIAM(new)	-0.396721	-0.513427	-0.274568	670.042	68.7164	2007.1	3	4.60602	321271	356670	360314	398763	401887	434445	378892	40420.2	10.668	276106	279382	307910	287799	17493.5	6.07838	252053	267795	276457	265435	12372.3	4.66113	304092	316783	318811	313229	7977.05	2.54672
O43684	Mitotic checkpoint protein BUB3 OS=Homo sapiens GN=BUB3 PE=1 SV=1 - [BUB3_HUMAN]	TPCNAGTFSQPEK	[3] DesthioBiotinIAM(new)	-0.203975	-0.281887	-0.274219	838.413	46.4863	1674.81	2	4.8762	945256	1.0466e+06	1.07175e+06	1.12841e+06	1.15389e+06	1.16802e+06	1.08566e+06	83305.9	7.67332	827287	985645	1.01462e+06	942519	100840	10.699	717536	921972	1.0394e+06	892969	162880	18.2403	846602	898996	947584	897727	50502.7	5.62562
P50395	Rab GDP dissociation inhibitor beta OS=Homo sapiens GN=GDI2 PE=1 SV=2 - [GDIB_HUMAN]	TYDATTHFETTCDDIK	[12] DesthioBiotinIAM(new)	-0.101235	-0.514504	-0.273996	719.669	51.0539	2155.99	3	5.78872	542243	563511	602581	655516	666473	672746	617178	56028.7	9.0782	492710	588668	644687	575355	76858	13.3584	394897	398157	503082	432046	61541.2	14.2441	458670	528274	544323	510422	45531	8.92027
P13489	Ribonuclease inhibitor OS=Homo sapiens GN=RNH1 PE=1 SV=2 - [RINI_HUMAN]	LGDVGMAELCPGLLHPSSR	[6] Oxidation|[10] DesthioBiotinIAM(new)	-0.0727733	-0.518411	-0.273982	755.391	58.1544	2263.15	3	2.56142	1.35212e+06	1.46028e+06	1.49994e+06	1.82416e+06	1.92927e+06	2.06318e+06	1.68816e+06	288979	17.118	1.23971e+06	1.67842e+06	1.89722e+06	1.60512e+06	334825	20.8598	831851	876020	1.82784e+06	1.17857e+06	562720	47.746	1.17307e+06	1.43075e+06	1.58467e+06	1.39616e+06	207966	14.8956
Q14203	Dynactin subunit 1 OS=Homo sapiens GN=DCTN1 PE=1 SV=3 - [DCTN1_HUMAN]	FELSENCSERPGLR	[7] DesthioBiotinIAM(new)	-0.152174	-0.0682965	-0.273699	644.995	50.9427	1931.96	3	5.6913	196995	218024	226630	234428	235437	236262	224629	15227.8	6.77907	194908	199231	212289	202142	9048.69	4.47639	197590	211812	233328	214243	17992.4	8.3981	172437	185169	199832	185812	13709.1	7.37791
Q9BT78	COP9 signalosome complex subunit 4 OS=Homo sapiens GN=COPS4 PE=1 SV=1 - [CSN4_HUMAN]	HALHCTILASAGQQR	[5] DesthioBiotinIAM(new)	-0.366048	-0.307788	-0.273563	634.678	44.2535	1901.01	3	3.94512	89829.6	89871.3	92185.5	92373.8	93821.9	94871.3	92158.9	2040.97	2.21462	60359.6	76144.1	78015.9	71506.6	9698.8	13.5635	60000.5	77916.1	85443.1	74453.3	13070	17.5546	70884.2	76503.3	81334.4	76240.6	5230.08	6.85996
P07947	Tyrosine-protein kinase Yes OS=Homo sapiens GN=YES1 PE=1 SV=3 - [YES_HUMAN]	LTTVCPTVKPQTQGLAK	[5] DesthioBiotinIAM(new)	-0.175437	-0.392858	-0.272505	694.4	48.8184	2080.18	3	3.33147	169022	170036	184366	187991	190536	191934	182314	10237.3	5.6152	155234	164397	164686	161439	5375.87	3.32997	130400	132479	153682	138854	12884	9.27881	124033	150815	177955	150934	26961.1	17.8628
Q8IWJ2	GRIP and coiled-coil domain-containing protein 2 OS=Homo sapiens GN=GCC2 PE=1 SV=4 - [GCC2_HUMAN]	CFIKEHENLKPLLEQK	[1] DesthioBiotinIAM(new)	-0.15322	0.0165931	-0.271747	567.068	50.2572	2264.24	4	4.31236	356234	360911	366645	367200	371004	395040	369506	13548.2	3.66658	322443	334125	340256	332275	9049.81	2.72359	309538	401556	410246	373780	55804.6	14.9298	271376	309690	337136	306068	33029.4	10.7916
Q14019	Coactosin-like protein OS=Homo sapiens GN=COTL1 PE=1 SV=3 - [COTL1_HUMAN]	YDGSTIVPGEQGAEYQHFIQQCTDDVR	[22] DesthioBiotinIAM(new)	-0.14538	-0.286592	-0.271236	1118.19	61.7351	3351.56	3	4.73705	2.7844e+06	2.94639e+06	2.99574e+06	3.43776e+06	3.45458e+06	3.76419e+06	3.23051e+06	377578	11.6879	2.83975e+06	2.89816e+06	3.02461e+06	2.92084e+06	94492.5	3.23512	1.97465e+06	2.51745e+06	3.45337e+06	2.64849e+06	748016	28.2431	2.65198e+06	2.66764e+06	2.71087e+06	2.67683e+06	30501.5	1.13946
Q14974	Importin subunit beta-1 OS=Homo sapiens GN=KPNB1 PE=1 SV=2 - [IMB1_HUMAN]	HFIMQVVCEATQCPDTR	[8] Carbamidomethyl|[13] DesthioBiotinIAM(new)	-0.320217	-0.276896	-0.271042	777.71	60.2728	2330.11	3	4.85125	444635	567336	825022	1.5709e+06	1.67882e+06	1.87366e+06	1.16006e+06	620086	53.4528	546779	551119	1.68956e+06	929151	658533	70.8746	566021	672456	1.63395e+06	957475	588255	61.4382	481268	488868	1.91397e+06	961368	824985	85.8136
Q96C90	Protein phosphatase 1 regulatory subunit 14B OS=Homo sapiens GN=PPP1R14B PE=1 SV=3 - [PP14B_HUMAN]	VKELLVDCYKPTEAFISGLLDK	[8] DesthioBiotinIAM(new)	-0.0730305	-0.335285	-0.270921	695.138	68.9031	2776.52	4	5.43473	625839	637335	648368	666287	667267	835383	680080	77779.8	11.4369	550070	662600	726861	646510	89486.9	13.8415	498986	503122	615042	539050	65843.9	12.2148	505452	536942	648536	563643	75186.6	13.3394
P61106	Ras-related protein Rab-14 OS=Homo sapiens GN=RAB14 PE=1 SV=4 - [RAB14_HUMAN]	KFMADCPHTIGVEFGTR	[3] Oxidation|[6] DesthioBiotinIAM(new)	-0.10164	-0.435611	-0.270471	741.039	51.7127	2220.09	3	5.4224	421394	445143	546139	596710	638951	670330	553111	102044	18.449	360634	488714	697106	515484	169826	32.945	277556	285042	664281	408960	221146	54.0754	353903	466374	555391	458556	100972	22.0195
P02545	Prelamin-A/C OS=Homo sapiens GN=LMNA PE=1 SV=1 - [LMNA_HUMAN]	TVLCGTCGQPADK	[4] Carbamidomethyl|[7] DesthioBiotinIAM(new)	-0.187833	-0.12364	-0.269942	823.408	46.6997	1644.8	2	3.67176	1.042e+07	1.07218e+07	1.16132e+07	1.19459e+07	1.27111e+07	1.27628e+07	1.16958e+07	981354	8.39066	9.60768e+06	1.00376e+07	1.11587e+07	1.0268e+07	800786	7.79884	9.84386e+06	1.05503e+07	1.18115e+07	1.07352e+07	996751	9.28488	9.33134e+06	9.77648e+06	9.99201e+06	9.69994e+06	336918	3.4734
Q01469	Fatty acid-binding protein, epidermal OS=Homo sapiens GN=FABP5 PE=1 SV=3 - [FABP5_HUMAN]	LVVECVMNNVTCTR	[5] DesthioBiotinIAM(new)|[7] Oxidation|[12] Carbamidomethyl	-0.353527	-0.567838	-0.269748	975.488	53.9032	1948.96	2	4.43848	792128	827957	937535	988312	1.03844e+06	1.11943e+06	950634	124875	13.1359	562561	794876	874657	744031	162141	21.7922	354330	574364	995277	641324	325678	50.7822	722916	812607	830029	788517	57476.2	7.28915
Q96RN5	Mediator of RNA polymerase II transcription subunit 15 OS=Homo sapiens GN=MED15 PE=1 SV=2 - [MED15_HUMAN]	FLVNLDPSHCSNNGTVHLICK	[10] DesthioBiotinIAM(new)|[20] Carbamidomethyl	-0.175127	-0.288468	-0.268709	666.844	58.1544	2663.35	4	5.76765	582210	582779	589398	607582	624523	626035	602088	20178.9	3.35149	515854	530240	553694	533263	19100	3.58172	440047	514704	524165	492972	46077.7	9.34692	487040	502455	509816	499770	11623	2.32566
Q96HE7	ERO1-like protein alpha OS=Homo sapiens GN=ERO1L PE=1 SV=2 - [ERO1A_HUMAN]	RDCAVKPCQSDEVPDGIK	[3] DesthioBiotinIAM(new)|[8] Carbamidomethyl	-0.252873	-0.29275	-0.268372	579.041	44.5042	2312.13	4	4.11496	352349	356412	358497	375490	393416	404116	373380	21458.6	5.74712	284835	327187	328027	313349	24698	7.88193	268570	310804	335046	304807	33641.4	11.037	283320	314256	332426	310001	24828.2	8.00907
P22061	Protein-L-isoaspartate(D-aspartate) O-methyltransferase OS=Homo sapiens GN=PCMT1 PE=1 SV=4 - [PIMT_HUMAN]	CNPYMDSPQSIGFQATISAPHMHAYALELLFDQLHEGAK	[1] DesthioBiotinIAM(new)|[22] Oxidation	-0.515025	-0.558693	-0.268369	929.454	70.2205	4642.23	5	5.33315	229208	239652	333346	874692	890700	949617	586202	351993	60.0463	265470	294559	670611	410213	225979	55.0883	194335	474447	525166	397983	178178	44.7703	136045	351215	972837	486699	434537	89.2825
P27708	CAD protein OS=Homo sapiens GN=CAD PE=1 SV=3 - [PYR1_HUMAN]	CEAYLK	[1] DesthioBiotinIAM(new)	-0.262716	-0.112537	-0.268147	511.773	46.9787	1021.53	2	4.63992	253929	269848	288491	292397	314569	323259	290416	26168.8	9.0108	222556	245946	257698	242067	17889.1	7.39018	264259	268335	273275	268623	4515.2	1.68087	229898	236146	257427	241157	14432.5	5.98469
O43237	Cytoplasmic dynein 1 light intermediate chain 2 OS=Homo sapiens GN=DYNC1LI2 PE=1 SV=1 - [DC1L2_HUMAN]	FVKDFQDYMEPEEGCQGSPQR	[9] Oxidation|[15] DesthioBiotinIAM(new)	-0.420571	-0.288705	-0.268088	934.759	51.0854	2801.26	3	4.86468	410551	410906	460565	691748	743361	744643	576962	166010	28.7732	392711	398557	501928	431065	61438.7	14.2528	340543	400342	676083	472323	178977	37.8929	427328	430163	579871	479121	87263.7	18.2133
O95757	Heat shock 70 kDa protein 4L OS=Homo sapiens GN=HSPA4L PE=1 SV=3 - [HS74L_HUMAN]	SIDLPIQSSLCR	[11] DesthioBiotinIAM(new)	-0.325397	-0.250663	-0.267728	814.449	62.9828	1626.88	2	4.42854	511904	512025	519158	547911	571751	663214	554327	58355.9	10.5273	368832	444825	513534	442397	72381.8	16.3613	371539	478290	547925	465918	88841.5	19.0681	438440	468433	474444	460439	19287.4	4.18892
Q96RN5	Mediator of RNA polymerase II transcription subunit 15 OS=Homo sapiens GN=MED15 PE=1 SV=2 - [MED15_HUMAN]	TFVPAMTAIHGPPITAPVVCTR	[6] Oxidation|[20] DesthioBiotinIAM(new)	-0.399498	-0.563125	-0.267125	864.471	60.2572	2590.39	3	5.80263	670199	710500	965671	1.08828e+06	1.09593e+06	1.12652e+06	942851	203552	21.5889	506973	732528	904888	714796	199549	27.9169	403980	460089	1.05039e+06	638154	358111	56.1166	611823	768674	969958	783485	179526	22.9138
O43390	Heterogeneous nuclear ribonucleoprotein R OS=Homo sapiens GN=HNRNPR PE=1 SV=1 - [HNRPR_HUMAN]	LCDSYEIRPGK	[2] DesthioBiotinIAM(new)	-0.201824	-0.111727	-0.267027	526.28	47.2532	1575.82	3	5.5836	462716	463062	493698	495376	509700	520334	490814	23735.5	4.83594	408566	415097	456552	426739	26025	6.09858	408805	474741	479171	454239	39409.3	8.67591	348267	419008	456370	407882	54903.7	13.4607
Q9Y383	Putative RNA-binding protein Luc7-like 2 OS=Homo sapiens GN=LUC7L2 PE=1 SV=2 - [LC7L2_HUMAN]	SHLLNCCPHDVLSGTR	[6] Carbamidomethyl|[7] DesthioBiotinIAM(new)	0.0126869	-0.0331225	-0.266995	527.017	47.81	2104.04	4	4.54201	515775	516658	525465	533699	555588	560460	534608	19337.8	3.6172	513712	549871	554405	539330	22301	4.13495	453006	521723	592691	522473	69845.3	13.3682	396283	463604	472968	444285	41833.9	9.41601
P39687	Acidic leucine-rich nuclear phosphoprotein 32 family member A OS=Homo sapiens GN=ANP32A PE=1 SV=1 - [AN32A_HUMAN]	VSGGLEVLAEKCPNLTHLNLSGNK	[12] DesthioBiotinIAM(new)	0.14692	-0.130826	-0.266946	698.133	60.0637	2788.5	4	4.40465	6.37996e+06	6.38967e+06	6.7189e+06	7.53905e+06	7.57499e+06	8.05159e+06	7.10903e+06	705930	9.93004	7.02048e+06	7.33042e+06	9.26251e+06	7.87114e+06	1.21488e+06	15.4347	6.20663e+06	6.26066e+06	7.01091e+06	6.49273e+06	449565	6.92413	5.2761e+06	6.1509e+06	6.29744e+06	5.90815e+06	552253	9.3473
P06744	Glucose-6-phosphate isomerase OS=Homo sapiens GN=GPI PE=1 SV=4 - [G6PI_HUMAN]	MIPCDFLIPVQTQHPIRK	[1] Oxidation|[4] DesthioBiotinIAM(new)	-0.153042	-0.518722	-0.266497	612.84	58.0563	2447.33	4	5.39995	1.8314e+06	2.06204e+06	2.12972e+06	2.8736e+06	2.98519e+06	3.02692e+06	2.48481e+06	534262	21.5011	1.58924e+06	2.37047e+06	2.74445e+06	2.23472e+06	589444	26.3766	1.24858e+06	1.24916e+06	2.70539e+06	1.73437e+06	840921	48.4855	1.69712e+06	2.03729e+06	2.46273e+06	2.06571e+06	383591	18.5694
P60709	Actin, cytoplasmic 1 OS=Homo sapiens GN=ACTB PE=1 SV=1 - [ACTB_HUMAN]	FRCPEALFQPSFLGMESCGIHETTFNSIMK	[3] Carbamidomethyl|[15] Oxidation|[18] DesthioBiotinIAM(new)|[29] Oxidation	-0.2657	-0.505988	-0.266317	952.206	64.1737	3804.8	4	4.87379	7.49588e+07	7.93702e+07	8.18912e+07	1.89292e+08	2.0188e+08	2.03239e+08	1.38439e+08	6.56146e+07	47.3962	6.23235e+07	9.06345e+07	1.925e+08	1.15153e+08	6.84639e+07	59.455	3.74947e+07	5.07891e+07	2.04172e+08	9.74854e+07	9.26324e+07	95.0218	7.16523e+07	9.27425e+07	1.80915e+08	1.15103e+08	5.7962e+07	50.3565
P18583	Protein SON OS=Homo sapiens GN=SON PE=1 SV=4 - [SON_HUMAN]	CVSVQTDPTDEIPTKK	[1] DesthioBiotinIAM(new)	-0.0487826	-0.18358	-0.265846	686.361	49.3207	2056.06	3	4.74598	4.55946e+06	4.57985e+06	4.61365e+06	4.63766e+06	4.73317e+06	4.82233e+06	4.65768e+06	100847	2.16518	3.93474e+06	4.72929e+06	4.84445e+06	4.50283e+06	495338	11.0006	3.79154e+06	4.14818e+06	4.36377e+06	4.10116e+06	289000	7.04679	3.84288e+06	3.85757e+06	3.9211e+06	3.87385e+06	41572.2	1.07315
P35222	Catenin beta-1 OS=Homo sapiens GN=CTNNB1 PE=1 SV=1 - [CTNB1_HUMAN]	NLALCPANHAPLREQGAIPR	[5] DesthioBiotinIAM(new)	-0.136186	-0.217545	-0.265692	610.089	50.1573	2436.33	4	3.67809	252494	275036	292997	303695	306913	312308	290574	22842.3	7.86112	243690	271542	277966	264399	18219.9	6.89105	217119	248210	284376	249902	33660.3	13.4694	217380	239453	268263	241699	25515.7	10.5568
O95994	Anterior gradient protein 2 homolog OS=Homo sapiens GN=AGR2 PE=1 SV=1 - [AGR2_HUMAN]	SKTSNKPLMIIHHLDECPHSQALK	[9] Oxidation|[17] DesthioBiotinIAM(new)	-0.645941	-0.276813	-0.264979	608.726	44.3495	3038.59	5	3.94399	730855	827806	881022	917072	1.26107e+06	1.28601e+06	983973	233042	23.6838	516782	544619	825100	628834	170540	27.1201	719281	843891	873379	812184	81795.7	10.0711	668066	743727	1.04483e+06	818873	199305	24.3389
Q15149	Plectin OS=Homo sapiens GN=PLEC PE=1 SV=3 - [PLEC_HUMAN]	EYGSCSHHYQQLLQSLEQGAQEESR	[5] DesthioBiotinIAM(new)	-0.229827	-0.195548	-0.264853	801.629	59.9858	3202.49	4	4.14835	2.42255e+06	2.43247e+06	2.59614e+06	2.67507e+06	2.67859e+06	2.78271e+06	2.59792e+06	144731	5.57103	2.07746e+06	2.22828e+06	2.3403e+06	2.21534e+06	131896	5.95376	2.1759e+06	2.25991e+06	2.37002e+06	2.26861e+06	97352.1	4.29127	2.12266e+06	2.14469e+06	2.21927e+06	2.16221e+06	50635.1	2.34182
Q16891	Mitochondrial inner membrane protein OS=Homo sapiens GN=IMMT PE=1 SV=1 - [IMMT_HUMAN]	ANCSDNEFTQALTAAIPPESLTR	[3] DesthioBiotinIAM(new)	-0.103538	-0.247513	-0.263952	915.794	70.6754	2744.36	3	5.68623	531323	545549	556189	561121	611859	668448	579082	51599.8	8.91063	468583	503942	644411	538979	93002.9	17.2554	380852	440243	642267	487788	137039	28.0941	398699	502120	545964	482261	75614.4	15.6791
P35579	Myosin-9 OS=Homo sapiens GN=MYH9 PE=1 SV=4 - [MYH9_HUMAN]	VEDMAELTCLNEASVLHNLK	[4] Oxidation|[9] DesthioBiotinIAM(new)	-0.148826	-0.42833	-0.263876	847.765	61.6253	2540.27	3	4.15469	2.2886e+06	2.34761e+06	2.39811e+06	2.59006e+06	2.61379e+06	2.65355e+06	2.48196e+06	155548	6.26716	1.58525e+06	2.56289e+06	2.56792e+06	2.23868e+06	565899	25.2782	1.18919e+06	1.7072e+06	2.63679e+06	1.84439e+06	733489	39.7686	1.86515e+06	2.13109e+06	2.20503e+06	2.06709e+06	178750	8.64742
Q9NQT5	Exosome complex component RRP40 OS=Homo sapiens GN=EXOSC3 PE=1 SV=3 - [EXOS3_HUMAN]	KLLAPDCEIIQEVGKLYPLEIVFGMNGR	[7] DesthioBiotinIAM(new)|[25] Oxidation	-0.0972965	-0.285229	-0.263258	865.224	77.4651	3456.87	4	4.87974	1.93753e+06	2.1465e+06	2.23291e+06	2.35454e+06	2.92914e+06	3.22932e+06	2.47166e+06	499014	20.1895	1.65698e+06	1.75428e+06	3.52012e+06	2.31046e+06	1.04873e+06	45.3904	1.11599e+06	1.73709e+06	3.23173e+06	2.02827e+06	1.08751e+06	53.6175	1.70132e+06	1.99341e+06	2.48345e+06	2.05939e+06	395222	19.1912
P22626	Heterogeneous nuclear ribonucleoproteins A2/B1 OS=Homo sapiens GN=HNRNPA2B1 PE=1 SV=2 - [ROA2_HUMAN]	LTDCVVMRDPASKR	[4] DesthioBiotinIAM(new)|[7] Oxidation	-0.0907718	-0.471793	-0.263093	476.505	41.1463	1901.99	4	4.77768	539013	589263	626929	655710	672547	711838	632550	61769.5	9.76516	513877	575563	692492	593977	90719.8	15.2733	280924	401956	685455	456112	207632	45.5221	380665	568537	632109	527104	130742	24.8039
O14979	Heterogeneous nuclear ribonucleoprotein D-like OS=Homo sapiens GN=HNRNPDL PE=1 SV=3 - [HNRDL_HUMAN]	YHQIGSGKCEIK	[9] DesthioBiotinIAM(new)	0.218406	-0.274406	-0.262866	415.473	38.307	1657.86	4	2.34772	44790.4	55683	62031	68532.1	77862.1	78197.7	64516	13074.6	20.2657	62983.4	76522.2	85677.4	75061	11417.3	15.2107	18036.1	67116.3	74871.4	53341.3	30820.1	57.7791	37708	59301.5	64299.3	53769.6	14132.4	26.2833
Q96LD4	Tripartite motif-containing protein 47 OS=Homo sapiens GN=TRIM47 PE=1 SV=2 - [TRI47_HUMAN]	LEESLCPR	[6] DesthioBiotinIAM(new)	-0.0337786	-0.0757995	-0.262447	621.832	50.3142	1241.65	2	4.21674	37446.3	39101.1	39913.1	41349.3	43157.5	43195.2	40693.8	2299.97	5.65191	36893	39321.1	43042.1	39752	3097.13	7.79113	37678	38564.1	39590.6	38610.9	957.17	2.47902	30985.6	31375.9	39414.3	33925.3	4757.68	14.024
P00568	Adenylate kinase isoenzyme 1 OS=Homo sapiens GN=AK1 PE=1 SV=3 - [KAD1_HUMAN]	KVNAEGSVDSVFSQVCTHLDALK	[16] DesthioBiotinIAM(new)	-0.0818146	-0.193109	-0.262364	686.609	64.1581	2742.41	4	2.02045	308867	333639	335270	340837	344683	346358	334943	13723.6	4.09729	284838	304358	360234	316477	39131.8	12.3648	286764	292463	299714	292981	6490.32	2.21527	251797	290103	295845	279248	23946.3	8.57526
Q6ZRV2	Protein FAM83H OS=Homo sapiens GN=FAM83H PE=1 SV=3 - [FA83H_HUMAN]	FPCQAAARPGPDPAPEAEPERR	[3] DesthioBiotinIAM(new)	-0.325546	-0.282648	-0.262199	665.339	45.131	2657.33	4	4.8858	2.32427e+06	2.38069e+06	2.42826e+06	2.51816e+06	2.8107e+06	3.06921e+06	2.58855e+06	291236	11.2509	1.9092e+06	2.09511e+06	2.19265e+06	2.06565e+06	144004	6.97136	2.06375e+06	2.15369e+06	2.16655e+06	2.128e+06	56007.3	2.63193	1.80492e+06	2.0389e+06	2.6313e+06	2.15837e+06	425949	19.7347
Q9C0C2	182 kDa tankyrase-1-binding protein OS=Homo sapiens GN=TNKS1BP1 PE=1 SV=4 - [TB182_HUMAN]	EHGVGGVSQCPEPGLR	[10] DesthioBiotinIAM(new)	-0.175554	-0.12136	-0.26187	639.995	46.4988	1916.96	3	4.77814	1.80033e+06	2.01979e+06	2.08063e+06	2.09073e+06	2.12779e+06	2.14305e+06	2.04372e+06	126741	6.20147	1.33579e+06	1.95022e+06	2.14268e+06	1.80957e+06	421433	23.2892	1.67326e+06	1.8303e+06	2.13293e+06	1.87883e+06	233646	12.4357	1.53987e+06	1.74721e+06	1.82635e+06	1.70447e+06	147943	8.67968
Q6R327	Rapamycin-insensitive companion of mTOR OS=Homo sapiens GN=RICTOR PE=1 SV=1 - [RICTR_HUMAN]	CHETGLLTIK	[1] DesthioBiotinIAM(new)	-0.0706094	0.103609	-0.261859	470.933	50.4329	1409.78	3	4.73147	190787	192161	200953	202888	203011	211395	200199	7671.09	3.83173	173027	191942	206942	190637	16994.7	8.91472	186358	216250	242709	215106	28193.1	13.1066	155290	168426	177190	166969	11022.3	6.6014
Q9BSH5	Haloacid dehalogenase-like hydrolase domain-containing protein 3 OS=Homo sapiens GN=HDHD3 PE=1 SV=1 - [HDHD3_HUMAN]	DSVPKEHILPSLAHLLPALDCLEGSTPGL	[21] DesthioBiotinIAM(new)	-0.0832656	0.200449	-0.261537	830.452	76.9469	3317.78	4	2.28788	460446	486969	526457	538708	570056	579791	527071	46497.1	8.82179	406395	501839	584303	497512	89032.9	17.8956	398692	698092	720119	605635	179555	29.6475	420909	423463	474675	439682	30331.3	6.89845
Q9H2D6	TRIO and F-actin-binding protein OS=Homo sapiens GN=TRIOBP PE=1 SV=3 - [TARA_HUMAN]	SSCELEVLLR	[3] DesthioBiotinIAM(new)	-0.0745589	0.174499	-0.26134	722.899	64.5489	1443.78	2	5.10842	758084	782815	787065	810639	822660	888254	808253	45224.8	5.59537	743665	759082	799882	767543	29047.8	3.78451	817918	953799	964799	912172	81811.2	8.96884	593209	620757	809041	674336	117468	17.4199
P31943	Heterogeneous nuclear ribonucleoprotein H OS=Homo sapiens GN=HNRNPH1 PE=1 SV=4 - [HNRH1_HUMAN]	YGDGGSTFQSTTGHCVHMR	[15] DesthioBiotinIAM(new)|[18] Oxidation	-0.373168	-0.37743	-0.261174	589.02	41.1463	2352.05	4	4.9321	8.17431e+06	8.20727e+06	9.80929e+06	1.03221e+07	1.17201e+07	1.18531e+07	1.00144e+07	1.61732e+06	16.15	7.05869e+06	7.94947e+06	8.18766e+06	7.73194e+06	595090	7.69652	5.32476e+06	7.11902e+06	1.06836e+07	7.70914e+06	2.72773e+06	35.3831	6.77865e+06	8.2912e+06	9.99836e+06	8.35607e+06	1.61083e+06	19.2774
Q9NVE5	Ubiquitin carboxyl-terminal hydrolase 40 OS=Homo sapiens GN=USP40 PE=2 SV=3 - [UBP40_HUMAN]	NQGGTCYLNSLLQTLHFTPEFR	[6] DesthioBiotinIAM(new)	0.0150224	-0.0147779	-0.260813	945.818	76.2617	2834.43	3	4.75016	1.25951e+06	1.26105e+06	1.26725e+06	1.28591e+06	1.30354e+06	1.34721e+06	1.28741e+06	33815.5	2.62663	1.24047e+06	1.28709e+06	1.3751e+06	1.30089e+06	68367.5	5.25545	1.26196e+06	1.27499e+06	1.28592e+06	1.27429e+06	11995.6	0.941355	965034	1.00207e+06	1.25638e+06	1.0745e+06	158604	14.7608
P40939	Trifunctional enzyme subunit alpha, mitochondrial OS=Homo sapiens GN=HADHA PE=1 SV=2 - [ECHA_HUMAN]	QFTPCQLLADHANSPNKK	[5] DesthioBiotinIAM(new)	-0.0411132	-0.0875997	-0.260494	577.805	52.5798	2307.19	4	4.95326	5.32397e+06	5.33568e+06	5.57753e+06	5.83072e+06	6.11429e+06	6.39939e+06	5.7636e+06	434219	7.53381	5.48459e+06	5.62173e+06	5.69869e+06	5.60167e+06	108449	1.93602	4.64494e+06	5.77232e+06	5.85488e+06	5.42405e+06	675985	12.4627	4.60078e+06	4.91069e+06	4.92292e+06	4.81146e+06	182561	3.79429
P31943	Heterogeneous nuclear ribonucleoprotein H OS=Homo sapiens GN=HNRNPH1 PE=1 SV=4 - [HNRH1_HUMAN]	GLPWSCSADEVQR	[6] DesthioBiotinIAM(new)	-0.0397766	-0.192341	-0.259661	872.431	58.6725	1742.85	2	3.23585	580303	680926	744640	1.64043e+06	1.66802e+06	1.78187e+06	1.1827e+06	567558	47.9884	647968	898235	1.9054e+06	1.15053e+06	665602	57.8516	658263	668795	1.77818e+06	1.03508e+06	643565	62.1754	462468	491795	2.0094e+06	987888	884779	89.5626
P19013	Keratin, type II cytoskeletal 4 OS=Homo sapiens GN=KRT4 PE=1 SV=4 - [K2C4_HUMAN]	GFSCGSAIVGGGKR	[4] DesthioBiotinIAM(new)	-0.165275	-0.11956	-0.259476	531.285	46.9319	1590.83	3	2.26924	1.93995e+06	1.95829e+06	1.96023e+06	1.9964e+06	2.08634e+06	2.14491e+06	2.01435e+06	82654.9	4.1033	1.66089e+06	1.74614e+06	1.98192e+06	1.79632e+06	166290	9.25729	1.81645e+06	1.82333e+06	1.92267e+06	1.85415e+06	59440.8	3.20583	1.65079e+06	1.65895e+06	1.73857e+06	1.68277e+06	48497.6	2.882
P62195	26S protease regulatory subunit 8 OS=Homo sapiens GN=PSMC5 PE=1 SV=1 - [PRS8_HUMAN]	AVAHHTDCTFIR	[8] DesthioBiotinIAM(new)	-0.143423	-0.210164	-0.259323	556.29	42.4802	1665.85	3	4.31535	138526	152620	162053	170064	176339	178783	163064	15391.7	9.43906	133595	152587	156718	147633	12331.4	8.35275	127237	129201	166439	140959	22088.3	15.67	94937.3	151933	161840	136237	36107.9	26.5038
P29034	Protein S100-A2 OS=Homo sapiens GN=S100A2 PE=1 SV=3 - [S10A2_HUMAN]	MMCSSLEQALAVLVTTFHK	[1] Oxidation|[2] Oxidation|[3] DesthioBiotinIAM(new)	-0.36763	-0.226439	-0.259311	813.086	78.7467	2436.24	3	5.89411	105052	107352	122935	234872	265275	282498	186331	83306.1	44.7088	85641.6	90655	256953	144416	97491.6	67.5072	73279.3	104378	300137	159265	122986	77.2211	82009.5	116683	268338	155677	99095.6	63.6547
Q9UJC3	Protein Hook homolog 1 OS=Homo sapiens GN=HOOK1 PE=1 SV=2 - [HOOK1_HUMAN]	LVSGGGACSDTGACTPAR	[8] DesthioBiotinIAM(new)|[14] Carbamidomethyl	-0.272843	-0.084818	-0.258478	659.319	44.574	1974.93	3	4.65957	1.06847e+06	1.07599e+06	1.07852e+06	1.13286e+06	1.14394e+06	1.15954e+06	1.10989e+06	40001.3	3.60409	829144	897635	1.02914e+06	918639	101638	11.064	951869	1.03224e+06	1.15544e+06	1.04652e+06	102533	9.79756	887080	912294	984121	927831	50351.8	5.42683
Q16881	Thioredoxin reductase 1, cytoplasmic OS=Homo sapiens GN=TXNRD1 PE=1 SV=3 - [TRXR1_HUMAN]	YLGIPGDKEYCISSDDLFSLPYCPGK	[11] Carbamidomethyl|[23] DesthioBiotinIAM(new)	-0.104573	-0.289665	-0.258137	1078.53	71.449	3232.57	3	6.2017	1.0391e+07	1.10885e+07	1.20133e+07	1.2318e+07	1.2716e+07	1.28476e+07	1.18957e+07	968158	8.1387	1.08684e+07	1.09596e+07	1.13639e+07	1.1064e+07	263741	2.38378	7.909e+06	1.00754e+07	1.12111e+07	9.73181e+06	1.67762e+06	17.2385	9.10792e+06	9.2816e+06	1.1451e+07	9.94682e+06	1.30551e+06	13.1249
P34932	Heat shock 70 kDa protein 4 OS=Homo sapiens GN=HSPA4 PE=1 SV=4 - [HSP74_HUMAN]	KPVVDCVVSVPCFYTDAER	[6] Carbamidomethyl|[12] DesthioBiotinIAM(new)	-0.196801	-0.425974	-0.258066	827.419	61.8464	2479.24	3	4.94645	270077	302711	329323	349348	367576	371021	331676	39466.7	11.8992	249637	285349	333158	289382	41906.5	14.4814	183657	258535	298443	246878	58274.3	23.6045	257274	283624	291152	277350	17789.5	6.4141
Q8IZL8	Proline-, glutamic acid- and leucine-rich protein 1 OS=Homo sapiens GN=PELP1 PE=1 SV=2 - [PELP1_HUMAN]	SAPHLPGLMCLLR	[9] Oxidation|[10] DesthioBiotinIAM(new)	-0.237053	-0.445779	-0.257827	573.988	61.4165	1718.94	3	5.46474	833241	889456	913572	964214	998719	1.01848e+06	936281	70372.8	7.51621	485692	798131	1.09941e+06	794412	306878	38.6295	439512	581533	1.04117e+06	687406	314493	45.7506	601847	683734	1.06359e+06	783056	246372	31.4629
Q15149	Plectin OS=Homo sapiens GN=PLEC PE=1 SV=3 - [PLEC_HUMAN]	CRPDQLTGLSLLPLSEK	[1] DesthioBiotinIAM(new)	-0.0143918	-0.14601	-0.257071	722.741	65.2562	2165.2	3	5.60525	439131	492426	505926	542035	548784	567367	515945	46813	9.07326	486387	498306	547777	510824	32552.9	6.37263	405826	425774	567250	466284	88006.5	18.874	429575	432554	433076	431735	1888.89	0.437512
Q52LJ0	Protein FAM98B OS=Homo sapiens GN=FAM98B PE=1 SV=1 - [FA98B_HUMAN]	EMACPYSVLISGDIKDR	[2] Oxidation|[4] DesthioBiotinIAM(new)	-0.245054	-0.471052	-0.256539	737.042	60.4038	2208.1	3	5.4075	3.03705e+06	3.49399e+06	3.66725e+06	3.74139e+06	3.75883e+06	3.87761e+06	3.59602e+06	301618	8.38755	2.9283e+06	3.01332e+06	3.16117e+06	3.03426e+06	117835	3.88348	2.12323e+06	2.22176e+06	3.43794e+06	2.59431e+06	732264	28.2258	2.76923e+06	3.08524e+06	3.17614e+06	3.0102e+06	213583	7.09529
P24752	Acetyl-CoA acetyltransferase, mitochondrial OS=Homo sapiens GN=ACAT1 PE=1 SV=1 - [THIL_HUMAN]	QAVLGAGLPISTPCTTINKVCASGMK	[14] Carbamidomethyl|[21] DesthioBiotinIAM(new)|[25] Oxidation	0.155	-0.421779	-0.256497	977.185	59.939	2928.53	3	3.57399	8.60722e+06	8.81404e+06	1.03188e+07	1.04491e+07	1.08092e+07	1.41227e+07	1.05202e+07	1.98381e+06	18.8572	8.32173e+06	1.27378e+07	1.40806e+07	1.17134e+07	3.01303e+06	25.7229	5.8242e+06	6.55056e+06	1.11853e+07	7.85335e+06	2.9083e+06	37.0326	7.62503e+06	7.72615e+06	1.10687e+07	8.80663e+06	1.95967e+06	22.2522
P55060	Exportin-2 OS=Homo sapiens GN=CSE1L PE=1 SV=3 - [XPO2_HUMAN]	IVEDEPNKICEADRVAIK	[10] DesthioBiotinIAM(new)	0.0385919	-0.0046929	-0.256223	585.319	48.4472	2337.25	4	5.24764	165770	180058	180890	181617	202987	206254	186263	15415.6	8.27629	188858	191010	194069	191312	2618.48	1.36869	163855	181604	211513	185658	24086.3	12.9735	145659	158697	163504	155953	9233.4	5.92062
P10809	60 kDa heat shock protein, mitochondrial OS=Homo sapiens GN=HSPD1 PE=1 SV=2 - [CH60_HUMAN]	AAVEEGIVLGGGCALLR	[13] DesthioBiotinIAM(new)	-0.219903	-0.273323	-0.256141	642.031	66.1602	1923.07	3	5.30241	1.15371e+06	1.23556e+06	1.23964e+06	1.32743e+06	1.45719e+06	1.47172e+06	1.31421e+06	128790	9.79983	1.08137e+06	1.15151e+06	1.15235e+06	1.12841e+06	40742.1	3.61058	778858	1.18703e+06	1.29628e+06	1.08739e+06	272724	25.0806	962610	1.05604e+06	1.28261e+06	1.10042e+06	164550	14.9534
Q6P1L5	Protein FAM117B OS=Homo sapiens GN=FAM117B PE=1 SV=2 - [F117B_HUMAN]	QSPFHGNHAAINQCQAPVPK	[14] DesthioBiotinIAM(new)	-0.376101	0.164873	-0.256084	610.816	43.7459	2439.23	4	4.86302	86927.7	92316	96519.8	99621.1	101402	102193	96496.5	5921.38	6.13636	61041	74210.9	87804.8	74352.2	13382.5	17.9988	102300	110908	111329	108179	5095.51	4.71025	70692.7	79278	92435.7	80802.1	10951.3	13.5533
P61158	Actin-related protein 3 OS=Homo sapiens GN=ACTR3 PE=1 SV=3 - [ARP3_HUMAN]	LGYAGNTEPQFIIPSCIAIK	[16] DesthioBiotinIAM(new)	-0.277572	-0.358082	-0.255912	811.111	71.2658	2430.31	3	5.64385	814760	820544	821309	960277	1.10848e+06	1.12263e+06	941334	145728	15.481	745888	754335	829517	776580	46039	5.92843	689071	722758	791460	734430	52182.9	7.10523	686173	748465	930344	788327	126872	16.0939
P04083	Annexin A1 OS=Homo sapiens GN=ANXA1 PE=1 SV=2 - [ANXA1_HUMAN]	MYGISLCQAILDETKGDYEK	[1] Oxidation|[7] DesthioBiotinIAM(new)	-0.23314	-0.389242	-0.255358	863.762	65.4705	2588.26	3	5.40617	1.93963e+07	2.16671e+07	2.3021e+07	3.09158e+07	3.13995e+07	3.19951e+07	2.63991e+07	5.6491e+06	21.3988	1.95096e+07	2.03654e+07	2.75047e+07	2.24599e+07	4.38982e+06	19.5451	1.32627e+07	1.40642e+07	3.31427e+07	2.01566e+07	1.12535e+07	55.8303	2.05704e+07	2.20787e+07	2.37008e+07	2.21167e+07	1.56556e+06	7.07866
Q86V48	Leucine zipper protein 1 OS=Homo sapiens GN=LUZP1 PE=1 SV=2 - [LUZP1_HUMAN]	GHVLGNGSQVTQAANSGCSK	[18] DesthioBiotinIAM(new)	-0.120375	0.0867349	-0.254872	737.706	41.7041	2210.1	3	4.13688	389686	416749	433797	446229	450459	479523	436074	30751.9	7.05199	264032	436265	503199	401165	123386	30.757	454239	465609	469436	463095	7904.29	1.70684	322982	383725	389663	365457	36903.6	10.0979
Q9NX70	Mediator of RNA polymerase II transcription subunit 29 OS=Homo sapiens GN=MED29 PE=1 SV=1 - [MED29_HUMAN]	LAHECLSQSCDSAK	[5] DesthioBiotinIAM(new)|[10] Carbamidomethyl	-0.224261	0.157207	-0.254821	615.627	40.8273	1843.86	3	2.36532	897391	900261	959490	1.07648e+06	1.0915e+06	1.09752e+06	1.00377e+06	95669.8	9.53102	571832	977738	1.02822e+06	859264	250200	29.1179	1.02813e+06	1.02837e+06	1.30151e+06	1.11933e+06	157770	14.095	818923	838994	865845	841254	23542.8	2.79854
Q9BVP2	Guanine nucleotide-binding protein-like 3 OS=Homo sapiens GN=GNL3 PE=1 SV=2 - [GNL3_HUMAN]	CPQVEEAIVQSGQK	[1] DesthioBiotinIAM(new)	0.0166318	-0.197477	-0.254629	604.652	52.8245	1810.93	3	5.26742	443133	495108	518570	572839	595836	596300	536964	61916.3	11.5308	528202	542136	559233	543190	15542.4	2.86131	383216	478033	543569	468273	80620.7	17.2166	426292	428481	495482	450085	39330.3	8.73841
Q14683	Structural maintenance of chromosomes protein 1A OS=Homo sapiens GN=SMC1A PE=1 SV=2 - [SMC1A_HUMAN]	EALIEIDYGDLCEDLKDAQAEEEIKQEMNTLQQK	[12] DesthioBiotinIAM(new)|[28] Oxidation	-0.191009	-0.385371	-0.253899	1067.02	69.0337	4264.07	4	5.8136	5.16541e+06	6.11024e+06	6.66007e+06	7.5272e+06	7.60643e+06	8.41652e+06	6.91431e+06	1.17313e+06	16.9666	4.83557e+06	5.42243e+06	7.91266e+06	6.05689e+06	1.63371e+06	26.9728	4.06997e+06	5.71361e+06	6.09683e+06	5.29347e+06	1.07677e+06	20.3415	4.80846e+06	5.21122e+06	7.3759e+06	5.79853e+06	1.38081e+06	23.8131
P55196	Afadin OS=Homo sapiens GN=MLLT4 PE=1 SV=3 - [AFAD_HUMAN]	LLEPEAPGLCRPPLPR	[10] DesthioBiotinIAM(new)	-0.168265	0.0189264	-0.25313	685.395	57.6999	2053.16	3	5.78175	84774.1	93582.3	95079	103076	104879	106012	97900.6	8248.74	8.42563	79335.2	90921	91112.6	87123	6745.1	7.74204	89285.5	94861.4	113433	99193.4	12643.3	12.7461	52037.4	74136.8	120263	82145.9	34811	42.377
P60604	Ubiquitin-conjugating enzyme E2 G2 OS=Homo sapiens GN=UBE2G2 PE=1 SV=1 - [UB2G2_HUMAN]	VCISILHAPGDDPMGYESSAER	[2] DesthioBiotinIAM(new)|[14] Oxidation	-0.0585957	-0.383452	-0.253035	887.092	58.2388	2658.25	3	4.89252	1.72888e+06	1.79999e+06	2.13884e+06	2.44763e+06	2.76402e+06	2.78096e+06	2.27672e+06	462025	20.2934	1.74029e+06	2.1399e+06	2.67812e+06	2.1861e+06	470619	21.5278	1.10587e+06	1.28395e+06	2.84619e+06	1.74534e+06	957518	54.8615	1.62478e+06	1.7692e+06	2.33741e+06	1.91046e+06	376730	19.7193
Q14135	Transcription cofactor vestigial-like protein 4 OS=Homo sapiens GN=VGLL4 PE=1 SV=4 - [VGLL4_HUMAN]	NCNLSHCPIAHSGCAAPGPASYR	[2] DesthioBiotinIAM(new)|[7] Carbamidomethyl|[14] Carbamidomethyl	-0.363684	-0.125382	-0.253014	684.821	44.574	2735.26	4	3.0461	1.48823e+06	1.54735e+06	1.55037e+06	1.66609e+06	1.70831e+06	1.72332e+06	1.61394e+06	97844.1	6.06243	1.11616e+06	1.24943e+06	1.39737e+06	1.25432e+06	140672	11.215	1.40738e+06	1.4472e+06	1.58422e+06	1.4796e+06	92767	6.26973	1.26506e+06	1.36652e+06	1.4314e+06	1.35433e+06	83841.8	6.19066
P62701	40S ribosomal protein S4, X isoform OS=Homo sapiens GN=RPS4X PE=1 SV=2 - [RS4X_HUMAN]	ECLPLIIFLR	[2] DesthioBiotinIAM(new)	0.182919	-0.29786	-0.252603	756.955	78.6309	1511.9	2	3.58358	411650	441906	508903	561110	592775	630441	524464	86053	16.4078	401225	593736	791120	595360	194953	32.7453	251666	469690	558533	426630	157900	37.011	343341	374300	603033	440225	141844	32.2207
P62333	26S protease regulatory subunit 10B OS=Homo sapiens GN=PSMC6 PE=1 SV=1 - [PRS10_HUMAN]	DHQPCIIFMDEIDAIGGR	[5] DesthioBiotinIAM(new)	-1.0618	-0.60565	-0.252175	776.05	72.3067	2325.13	3	1.50124	35390.4	44405	60150.1	171804	174349	191438	112923	73342.7	64.9494	21891	36184.9	104206	54094	43983	81.3084	34836	43753.2	144041	74210.1	60639.5	81.7133	32535.5	72257	179647	94813.3	76105.6	80.2689
P13667	Protein disulfide-isomerase A4 OS=Homo sapiens GN=PDIA4 PE=1 SV=2 - [PDIA4_HUMAN]	DVLIEFYAPWCGHCK	[11] DesthioBiotinIAM(new)|[14] Carbamidomethyl	0.0805194	-0.0192198	-0.252101	1067.52	69.6872	2133.02	2	-0.0725914	712842	880783	887809	916686	1.01474e+06	1.11314e+06	920999	135478	14.7099	877120	953700	1.09077e+06	973864	108243	11.1148	855098	931262	940074	908811	46725.2	5.14135	751376	759260	809379	773338	31460.5	4.06814
Q6P2H3	Centrosomal protein of 85 kDa OS=Homo sapiens GN=CEP85 PE=1 SV=1 - [CEP85_HUMAN]	EQSCELSTCR	[4] DesthioBiotinIAM(new)|[9] Carbamidomethyl	-0.238717	-0.111674	-0.2508	754.848	45.131	1507.68	2	3.4978	518971	521407	533539	577889	583660	584340	553301	31862.3	5.75858	400145	447530	559089	468922	81602.6	17.4022	425575	534781	575906	512087	77692.4	15.1717	452914	454592	487526	465011	19516.9	4.1971
P23526	Adenosylhomocysteinase OS=Homo sapiens GN=AHCY PE=1 SV=4 - [SAHH_HUMAN]	QAQYLGMSCDGPFKPDHYR	[7] Oxidation|[9] DesthioBiotinIAM(new)	-0.447937	-0.323762	-0.250374	632.051	49.8723	2524.18	4	5.1002	703208	747556	782634	1.04393e+06	1.08023e+06	1.08982e+06	907897	181437	19.9844	616551	620591	759568	665570	81429.8	12.2346	572801	574726	1.02866e+06	725395	262635	36.2058	687033	703065	899649	763249	118398	15.5123
Q9BVP2	Guanine nucleotide-binding protein-like 3 OS=Homo sapiens GN=GNL3 PE=1 SV=2 - [GNL3_HUMAN]	KLETNPDIKPSNVEPMEKEFGLCK	[16] Oxidation|[23] DesthioBiotinIAM(new)	-0.293968	-0.378941	-0.24966	612.52	50.2337	3057.57	5	4.4817	660897	702957	757598	903839	1.04137e+06	1.18126e+06	874654	205683	23.516	634188	748062	757998	713416	68792.9	9.64274	417112	478118	1.1226e+06	672610	390894	58.116	604776	720454	881770	735667	139122	18.911
P52943	Cysteine-rich protein 2 OS=Homo sapiens GN=CRIP2 PE=1 SV=1 - [CRIP2_HUMAN]	TLTPGGHAEHDGKPFCHKPCYATLFGPK	[16] Carbamidomethyl|[20] DesthioBiotinIAM(new)	-0.24651	-0.523525	-0.2491	673.341	47.0305	3361.67	5	5.60156	5.46687e+06	6.35544e+06	9.20714e+06	1.01965e+07	1.12952e+07	1.39061e+07	9.40455e+06	3.1403e+06	33.3912	5.18881e+06	8.15965e+06	1.04338e+07	7.92741e+06	2.63018e+06	33.1784	5.5685e+06	5.94394e+06	8.11497e+06	6.54247e+06	1.3747e+06	21.012	4.58823e+06	5.10938e+06	1.40419e+07	7.91319e+06	5.31405e+06	67.1544
Q1KMD3	Heterogeneous nuclear ribonucleoprotein U-like protein 2 OS=Homo sapiens GN=HNRNPUL2 PE=1 SV=1 - [HNRL2_HUMAN]	EGCTEVSLLR	[3] DesthioBiotinIAM(new)	-0.396127	-0.193616	-0.248925	701.875	56.5415	1401.74	2	4.70489	3.96501e+06	4.12346e+06	4.25921e+06	4.48765e+06	4.49786e+06	4.52265e+06	4.30931e+06	231714	5.37707	2.81698e+06	3.24771e+06	3.75917e+06	3.27462e+06	471672	14.4039	3.38442e+06	3.89047e+06	4.02942e+06	3.76811e+06	339465	9.00889	3.48045e+06	3.67628e+06	3.72242e+06	3.62638e+06	128472	3.5427
Q13506	NGFI-A-binding protein 1 OS=Homo sapiens GN=NAB1 PE=1 SV=2 - [NAB1_HUMAN]	CAATTCVQSLGQGK	[1] DesthioBiotinIAM(new)|[6] Carbamidomethyl	-0.111855	-0.436128	-0.248798	860.433	48.5763	1718.85	2	3.57255	111312	111325	130564	140416	146097	149307	131503	16882.6	12.8382	82862.5	124506	157710	121693	37503	30.8177	85649	98084	107855	97196.2	11129.8	11.4509	100407	110940	120672	110673	10135.1	9.15774
P42224	Signal transducer and activator of transcription 1-alpha/beta OS=Homo sapiens GN=STAT1 PE=1 SV=2 - [STAT1_HUMAN]	VMCIEHEIK	[2] Oxidation|[3] DesthioBiotinIAM(new)	-0.358767	-0.405508	-0.248502	471.914	44.3561	1412.72	3	4.10139	359147	362446	463079	510116	515333	567443	462927	85748.2	18.523	278283	362100	442632	361005	82179.9	22.7642	228543	321886	498060	349496	136863	39.1601	363586	373051	432398	389678	37297.4	9.57132
Q96DF8	Protein DGCR14 OS=Homo sapiens GN=DGCR14 PE=1 SV=1 - [DGC14_HUMAN]	CQLQQAAALNAQHK	[1] DesthioBiotinIAM(new)	-0.305346	-0.0692697	-0.248431	607.327	45.5651	1818.96	3	3.42567	599148	621049	624035	626478	649523	698354	636431	34308.1	5.3907	439781	538896	566415	515031	66605	12.9322	561097	600496	658193	606595	48834.6	8.0506	466800	569200	571265	535755	59726	11.148
O00429	Dynamin-1-like protein OS=Homo sapiens GN=DNM1L PE=1 SV=2 - [DNM1L_HUMAN]	LHDAIVEVVTCLLR	[11] DesthioBiotinIAM(new)	0.109014	0.00951646	-0.248241	626.363	73.7675	1876.07	3	3.86476	3.2333e+06	3.24667e+06	3.46983e+06	3.97375e+06	4.41871e+06	5.3074e+06	3.94161e+06	812558	20.6149	2.86039e+06	4.84126e+06	5.05132e+06	4.25099e+06	1.20886e+06	28.4372	3.45736e+06	4.18237e+06	4.26336e+06	3.9677e+06	443817	11.1858	3.25179e+06	3.30669e+06	3.39711e+06	3.31853e+06	73379.8	2.21121
A6NNZ2	Tubulin beta-8 chain-like protein LOC260334 OS=Homo sapiens PE=1 SV=1 - [TBB8L_HUMAN]	TAVCDIPPR	[4] DesthioBiotinIAM(new)	-0.187039	-0.291019	-0.248241	634.348	49.9778	1266.68	2	4.87769	3.1657e+07	3.16582e+07	3.19382e+07	3.22331e+07	3.39327e+07	3.40933e+07	3.25854e+07	1.12724e+06	3.45933	2.59513e+07	2.96849e+07	3.02335e+07	2.86233e+07	2.33016e+06	8.14081	2.56473e+07	2.64059e+07	2.78453e+07	2.66329e+07	1.11643e+06	4.19192	2.33811e+07	2.78552e+07	3.10669e+07	2.74344e+07	3.86012e+06	14.0704
Q9NRR5	Ubiquilin-4 OS=Homo sapiens GN=UBQLN4 PE=1 SV=2 - [UBQL4_HUMAN]	DKEEIVICDR	[8] DesthioBiotinIAM(new)	-0.0781751	-0.199362	-0.248029	505.935	50.3389	1514.78	3	5.03929	1.58001e+06	1.62176e+06	1.64261e+06	1.65648e+06	1.72501e+06	1.79607e+06	1.67032e+06	77818.6	4.65889	1.53131e+06	1.57148e+06	1.64388e+06	1.58222e+06	57048.4	3.60559	1.39296e+06	1.43361e+06	1.53766e+06	1.45474e+06	74630	5.13011	1.29763e+06	1.30232e+06	1.61953e+06	1.40649e+06	184510	13.1185
Q96I24	Far upstream element-binding protein 3 OS=Homo sapiens GN=FUBP3 PE=1 SV=2 - [FUBP3_HUMAN]	IQIASESSGIPERPCVLTGTPESIEQAK	[15] DesthioBiotinIAM(new)	0.0854422	-0.242754	-0.247983	1079.57	58.7811	3235.69	3	4.29685	1.28755e+06	1.38043e+06	1.49089e+06	1.50517e+06	1.52563e+06	1.52999e+06	1.45328e+06	97977.9	6.74186	1.49236e+06	1.5503e+06	1.58318e+06	1.54195e+06	45980.6	2.98198	1.102e+06	1.13992e+06	1.44271e+06	1.22821e+06	186727	15.2032	1.16554e+06	1.17981e+06	1.32595e+06	1.22377e+06	88780.5	7.2547
Q9BU76	Multiple myeloma tumor-associated protein 2 OS=Homo sapiens GN=MMTAG2 PE=1 SV=1 - [MMTA2_HUMAN]	APCAGPSREEELAAVR	[3] DesthioBiotinIAM(new)	-0.268929	-0.274231	-0.247467	651.34	46.9319	1951	3	2.47242	327308	340185	355139	357579	398957	422633	366967	36442.4	9.93069	267230	306984	339462	304559	36176.9	11.8785	288561	289036	332728	303442	25363.7	8.35869	273500	279391	374480	309123	56676.9	18.3347
Q15185	Prostaglandin E synthase 3 OS=Homo sapiens GN=PTGES3 PE=1 SV=1 - [TEBP_HUMAN]	LTFSCLGGSDNFK	[5] DesthioBiotinIAM(new)	-0.222678	-0.154544	-0.247393	842.927	61.7664	1683.84	2	5.7533	1.71905e+06	1.83697e+06	1.92547e+06	2.0292e+06	2.06063e+06	2.15608e+06	1.95457e+06	159731	8.17221	1.56944e+06	1.58683e+06	1.86877e+06	1.67501e+06	168022	10.0311	1.73123e+06	1.74043e+06	1.79639e+06	1.75602e+06	35267.1	2.00836	1.44858e+06	1.56288e+06	1.92823e+06	1.64656e+06	250537	15.2157
Q9NZ09	Ubiquitin-associated protein 1 OS=Homo sapiens GN=UBAP1 PE=1 SV=1 - [UBAP1_HUMAN]	ATLDFKPLHKPNGFITLPQLGNCEK	[23] DesthioBiotinIAM(new)	-0.201154	-0.160993	-0.247132	616.34	60.6082	3076.66	5	3.28839	599165	684208	691765	701631	735282	745709	692960	52008.2	7.50522	540282	573964	694076	602774	80843.4	13.4119	563896	604533	690940	619790	64881.6	10.4683	572735	583213	595654	583867	11473.5	1.96509
P10809	60 kDa heat shock protein, mitochondrial OS=Homo sapiens GN=HSPD1 PE=1 SV=2 - [CH60_HUMAN]	CEFQDAYVLLSEK	[1] DesthioBiotinIAM(new)	-0.154568	-0.210811	-0.246615	920.963	67.2853	1839.91	2	1.9699	732728	743503	814060	830776	847074	915288	813905	68131.4	8.37092	671491	744730	777419	731213	54242.5	7.41815	514698	690474	904594	703255	195262	27.7655	611538	719576	726937	686017	64605.4	9.41746
P47756	F-actin-capping protein subunit beta OS=Homo sapiens GN=CAPZB PE=1 SV=4 - [CAPZB_HUMAN]	QMEKDETVSDCSPHIANIGR	[2] Oxidation|[11] DesthioBiotinIAM(new)	-0.358353	-0.33275	-0.2464	636.309	46.8327	2541.21	4	4.78012	1.86627e+07	1.94833e+07	2.04976e+07	2.18944e+07	2.41741e+07	2.70483e+07	2.19601e+07	3.16045e+06	14.3918	1.57347e+07	1.69591e+07	1.86963e+07	1.713e+07	1.48817e+06	8.68748	1.16725e+07	1.41416e+07	2.64961e+07	1.74368e+07	7.94215e+06	45.5483	1.76864e+07	1.86688e+07	1.91816e+07	1.85123e+07	759750	4.10404
O94763	Unconventional prefoldin RPB5 interactor 1 OS=Homo sapiens GN=URI1 PE=1 SV=3 - [RMP_HUMAN]	MSDAAGDIVDIREEIKCDFEFK	[1] Oxidation|[17] DesthioBiotinIAM(new)	-0.0722291	-0.34102	-0.245768	711.598	65.5174	2842.36	4	4.1093	315870	318796	377337	420380	426386	444213	383830	56005.6	14.5913	290044	338786	466431	365087	91087	24.9494	210501	275906	422675	303027	108656	35.8568	302983	321963	346183	323710	21652.9	6.68899
Q9NQW6	Actin-binding protein anillin OS=Homo sapiens GN=ANLN PE=1 SV=2 - [ANLN_HUMAN]	QKELACLR	[6] DesthioBiotinIAM(new)	-0.399589	0.118753	-0.245321	419.578	44.0889	1255.71	3	4.38388	82816.2	84901.9	86390.2	89149.7	92539.4	93132.6	88155	4175.84	4.73693	57588.7	67919	74976.4	66828	8745.04	13.0859	88447.3	97056.3	101651	95718.4	6702.94	7.00278	67647.9	75764	79698.1	74370	6144.88	8.26258
Q8N7H5	RNA polymerase II-associated factor 1 homolog OS=Homo sapiens GN=PAF1 PE=1 SV=2 - [PAF1_HUMAN]	VKYCNSLPDIPFDPK	[4] DesthioBiotinIAM(new)	-0.288175	-0.347774	-0.245134	678.025	60.5133	2031.05	3	2.08024	166095	175106	189050	197630	200567	211522	189995	16895.1	8.89242	154210	156208	156363	155594	1200.67	0.77167	146858	147421	153612	149297	3747.45	2.51006	145040	161572	174306	160306	14674	9.15374
P63010	AP-2 complex subunit beta OS=Homo sapiens GN=AP2B1 PE=1 SV=1 - [AP2B1_HUMAN]	CAIKVEQSAER	[1] DesthioBiotinIAM(new)	-0.0590372	0.0976408	-0.244904	510.61	42.2895	1528.81	3	3.7492	39804.4	40390.5	42378.8	45911.2	48454	53409.8	45058.1	5264.55	11.6839	36957.3	45467.8	47329.5	43251.5	5529.87	12.7854	47248.9	48561.1	48829.7	48213.2	845.854	1.7544	32497.3	39944.6	41627.9	38023.3	4859.08	12.7792
P68402	Platelet-activating factor acetylhydrolase IB subunit beta OS=Homo sapiens GN=PAFAH1B2 PE=1 SV=1 - [PA1B2_HUMAN]	LANVQLLDTDGGFVHSDGAISCHDMFDFLHLTGGGYAK	[22] DesthioBiotinIAM(new)|[25] Oxidation	-0.012824	0.0467203	-0.244399	867.623	67.9053	4333.08	5	5.45955	5.33831e+06	5.5298e+06	5.85288e+06	6.28833e+06	6.58133e+06	6.79834e+06	6.06483e+06	585453	9.65324	4.77342e+06	5.28915e+06	7.97091e+06	6.01116e+06	1.71667e+06	28.5581	5.84452e+06	6.31215e+06	6.63668e+06	6.26445e+06	398230	6.35698	3.40635e+06	4.64056e+06	7.31229e+06	5.11973e+06	1.99657e+06	38.9976
P14625	Endoplasmin OS=Homo sapiens GN=HSP90B1 PE=1 SV=1 - [ENPL_HUMAN]	KGYEVIYLTEPVDEYCIQALPEFDGKR	[16] DesthioBiotinIAM(new)	-0.0434043	-0.132784	-0.244132	868.693	67.2525	3470.74	4	-0.292303	5.0023e+06	5.2318e+06	5.72327e+06	5.8704e+06	6.31743e+06	6.34955e+06	5.74912e+06	552128	9.6037	4.86762e+06	5.64455e+06	6.22403e+06	5.57873e+06	680597	12.1998	4.39769e+06	5.38608e+06	5.94704e+06	5.2436e+06	784441	14.96	4.55775e+06	4.7881e+06	5.21652e+06	4.85412e+06	334310	6.88713
Q9NTZ6	RNA-binding protein 12 OS=Homo sapiens GN=RBM12 PE=1 SV=1 - [RBM12_HUMAN]	VCAHITNIPFSITK	[2] DesthioBiotinIAM(new)	-0.0937985	-0.294397	-0.243906	614.012	58.6725	1839.01	3	3.29054	188615	190925	192494	194147	213207	214360	198958	11633.5	5.84721	181404	186390	191508	186434	5052.37	2.71001	156198	162556	167944	162233	5879.55	3.62414	166862	167888	169283	168011	1215.13	0.723244
P52597	Heterogeneous nuclear ribonucleoprotein F OS=Homo sapiens GN=HNRNPF PE=1 SV=3 - [HNRPF_HUMAN]	YGDSEFTVQSTTGHCVHMR	[15] DesthioBiotinIAM(new)|[18] Oxidation	-0.463921	-0.261404	-0.243751	617.536	45.3054	2466.12	4	4.54574	3.35315e+06	3.49612e+06	4.26262e+06	5.07006e+06	5.25122e+06	5.45038e+06	4.48059e+06	913197	20.3812	2.88801e+06	3.09524e+06	3.76221e+06	3.24849e+06	456807	14.0622	2.51771e+06	3.07032e+06	5.62611e+06	3.73805e+06	1.65829e+06	44.3624	3.24352e+06	3.85743e+06	4.25126e+06	3.78407e+06	507862	13.4211
P30041	Peroxiredoxin-6 OS=Homo sapiens GN=PRDX6 PE=1 SV=3 - [PRDX6_HUMAN]	DFTPVCTTELGR	[6] DesthioBiotinIAM(new)	-0.351611	-0.464417	-0.243196	817.918	60.3199	1633.82	2	4.36815	790142	925458	990721	999729	1.14889e+06	1.15599e+06	1.00182e+06	138683	13.8431	778867	783623	792921	785137	7148.17	0.910436	648285	722890	807079	726085	79444.9	10.9415	558749	903696	1.07679e+06	846411	263728	31.1583
P58107	Epiplakin OS=Homo sapiens GN=EPPK1 PE=1 SV=2 - [EPIPL_HUMAN]	GLVPQNEGLPLLQVQLATGGVVDPVHGVHLPQAAACR	[36] DesthioBiotinIAM(new)	-0.0265874	-0.415452	-0.242914	1013.31	70.8724	4049.23	4	6.40246	3.2304e+06	3.27937e+06	3.46721e+06	3.54797e+06	3.8288e+06	3.87053e+06	3.53738e+06	268983	7.60401	2.69788e+06	3.49932e+06	4.22116e+06	3.47279e+06	761985	21.9416	2.48268e+06	2.48796e+06	2.98618e+06	2.65227e+06	289182	10.9032	2.73861e+06	3.0132e+06	3.21584e+06	2.98922e+06	239514	8.01261
Q9HB19	Pleckstrin homology domain-containing family A member 2 OS=Homo sapiens GN=PLEKHA2 PE=1 SV=2 - [PKHA2_HUMAN]	CEQDREPLR	[1] DesthioBiotinIAM(new)	-0.156131	0.337896	-0.242872	481.247	39.1833	1440.72	3	4.00216	7490.56	16864.8	52815.5	64733	79195.2	88376.3	51579.2	32985.2	63.9506	10031.5	43223.5	85611	46288.7	37882.8	81.8404	7430.32	92737.6	95406.8	65191.6	50040.5	76.7592	8171	50111.5	72480.3	43587.6	32647.2	74.9003
P15924	Desmoplakin OS=Homo sapiens GN=DSP PE=1 SV=3 - [DESP_HUMAN]	ETQTECEWTVDTSK	[6] DesthioBiotinIAM(new)	-0.713198	-0.489653	-0.242476	976.952	54.2306	1951.89	2	2.83214	57902.2	70645.2	81378.4	172907	203738	204816	131898	69194.4	52.4606	37869.7	60248.8	143241	80453.3	55515.5	69.0033	49185.6	64283.5	168343	93937.2	64877.6	69.0649	54093	56297	224087	111492	97516.3	87.4645
Q9C0C2	182 kDa tankyrase-1-binding protein OS=Homo sapiens GN=TNKS1BP1 PE=1 SV=4 - [TB182_HUMAN]	CGIGQEEMEASSSQDQSK	[1] DesthioBiotinIAM(new)|[8] Oxidation	-0.344363	-0.309273	-0.242456	742.663	45.3541	2224.97	3	4.25627	694640	721530	930932	954037	957759	1.1114e+06	895050	158607	17.7204	599176	742438	773359	704991	92933.4	13.1822	424544	539046	1.20346e+06	722348	420566	58.222	627149	651859	990762	756590	203175	26.8541
Q9Y6A5	Transforming acidic coiled-coil-containing protein 3 OS=Homo sapiens GN=TACC3 PE=1 SV=1 - [TACC3_HUMAN]	HGGVCAPAAVATSPPGAIPK	[5] DesthioBiotinIAM(new)	-0.167013	-0.28643	-0.242144	699.717	50.537	2096.13	3	4.28767	266304	266834	279256	289504	295187	323781	286811	21544.7	7.5118	253787	255581	257006	255458	1613.17	0.631481	214545	237436	253514	235165	19583.4	8.32754	193751	227076	306658	242495	58011.5	23.9227
Q0VF96	Cingulin-like protein 1 OS=Homo sapiens GN=CGNL1 PE=1 SV=2 - [CGNL1_HUMAN]	QDLECDKISLER	[5] DesthioBiotinIAM(new)	-0.282817	-0.0516688	-0.241728	582.304	51.1572	1743.89	3	3.90055	410031	420828	461604	469851	469984	472388	450781	27835.8	6.17502	325659	375698	410248	370535	42529.8	11.4779	401221	431002	472544	434922	35822.8	8.2366	367459	379647	396613	381240	14642.3	3.84071
O00116	Alkyldihydroxyacetonephosphate synthase, peroxisomal OS=Homo sapiens GN=AGPS PE=1 SV=1 - [ADAS_HUMAN]	AHGHCLHEIFLLR	[5] DesthioBiotinIAM(new)	-0.142654	-0.446304	-0.241312	461.256	51.9716	1840.99	4	3.49584	478099	484206	512415	519384	545397	554970	515745	31158	6.04135	432247	457008	512310	467188	40991.1	8.77399	328408	355108	452032	378516	65051.1	17.1858	282203	500087	526633	436308	134117	30.7391
Q12874	Splicing factor 3A subunit 3 OS=Homo sapiens GN=SF3A3 PE=1 SV=1 - [SF3A3_HUMAN]	KHPNEICVPMSVEFEELLK	[7] DesthioBiotinIAM(new)|[10] Oxidation	-0.01553	-0.220122	-0.241105	852.11	61.8464	2553.31	3	4.82052	686689	705046	729707	757229	791933	810863	746911	48782.4	6.53122	598502	734969	883272	738914	142426	19.275	491164	518628	913861	641218	236515	36.8853	561233	592816	741828	631959	96450.9	15.2622
Q15149	Plectin OS=Homo sapiens GN=PLEC PE=1 SV=3 - [PLEC_HUMAN]	SHRVPLDVACAR	[10] DesthioBiotinIAM(new)	-0.284875	-0.18162	-0.240887	540.633	43.9875	1618.88	3	3.32421	312587	325884	327980	340817	344555	355109	334489	15249	4.55889	239588	286159	297911	274553	30845.3	11.2348	269950	304705	310113	294923	21795.6	7.39026	241201	285466	322490	283053	40698.2	14.3783
Q92844	TRAF family member-associated NF-kappa-B activator OS=Homo sapiens GN=TANK PE=1 SV=2 - [TANK_HUMAN]	TKPSNLVNTCIR	[10] DesthioBiotinIAM(new)	-0.468379	-0.0900391	-0.240172	547.977	46.8238	1640.91	3	3.71711	162889	182491	192027	193059	207856	210290	191436	17453	9.11688	115231	131699	168165	138365	27088.9	19.5779	175884	180632	183044	179853	3642.8	2.02543	155718	157339	173176	162078	9645.37	5.95108
O95336	6-phosphogluconolactonase OS=Homo sapiens GN=PGLS PE=1 SV=2 - [6PGL_HUMAN]	AACCLAGAR	[3] DesthioBiotinIAM(new)|[4] Carbamidomethyl	-0.0744943	0.0354892	-0.240125	594.805	44.9751	1187.59	2	3.7434	5.19882e+06	5.44551e+06	5.52248e+06	5.59981e+06	5.6557e+06	5.74811e+06	5.52841e+06	192411	3.48041	4.95956e+06	5.18914e+06	5.60187e+06	5.25019e+06	325475	6.1993	5.23208e+06	5.56343e+06	6.20276e+06	5.66609e+06	493416	8.70824	4.3476e+06	4.73981e+06	4.95484e+06	4.68075e+06	307899	6.57799
Q15149	Plectin OS=Homo sapiens GN=PLEC PE=1 SV=3 - [PLEC_HUMAN]	TLLQGSGCLAGIYLEDTKEK	[8] DesthioBiotinIAM(new)	-0.0823618	-0.257668	-0.239954	812.437	62.3845	2434.29	3	4.44506	1.50524e+06	1.54671e+06	1.60953e+06	1.65496e+06	1.7094e+06	1.77053e+06	1.63273e+06	99553.1	6.09734	1.46241e+06	1.48673e+06	1.67725e+06	1.54213e+06	117648	7.6289	1.25022e+06	1.39921e+06	1.4476e+06	1.36568e+06	102873	7.53271	1.31015e+06	1.40074e+06	1.43676e+06	1.38255e+06	65239.2	4.71876
P29323	Ephrin type-B receptor 2 OS=Homo sapiens GN=EPHB2 PE=1 SV=5 - [EPHB2_HUMAN]	TTSEGATNCVCR	[9] DesthioBiotinIAM(new)|[11] Carbamidomethyl	0.0858477	-0.959122	-0.239844	797.873	41.5024	1593.73	2	4.4678	134011	158638	172631	175871	187457	194205	170469	21702.5	12.7311	162834	183840	196087	180920	16817.5	9.29555	29500.8	98070	135481	87684	53748.2	61.2976	131630	132889	168559	144359	20966.9	14.5241
P52943	Cysteine-rich protein 2 OS=Homo sapiens GN=CRIP2 PE=1 SV=1 - [CRIP2_HUMAN]	ASSVTTFTGEPNTCPR	[14] DesthioBiotinIAM(new)	0.000840159	-0.0949462	-0.239639	982.486	51.6793	1962.96	2	5.11054	1.5747e+06	1.74763e+06	1.825e+06	1.85865e+06	1.85984e+06	1.91568e+06	1.79691e+06	122043	6.79184	1.60873e+06	1.70906e+06	2.0761e+06	1.79796e+06	246044	13.6846	1.33859e+06	1.4844e+06	2.2244e+06	1.68246e+06	474960	28.23	1.47852e+06	1.49347e+06	1.59374e+06	1.52191e+06	62655.1	4.11687
Q9Y261	Hepatocyte nuclear factor 3-beta OS=Homo sapiens GN=FOXA2 PE=1 SV=1 - [FOXA2_HUMAN]	AAAGAQASQAQLGEAAGPASETPAGTESPHSSASPCQEHKR	[36] DesthioBiotinIAM(new)	-0.299793	-0.00580482	-0.239303	848.81	41.8938	4239.01	5	2.82511	941060	994409	1.00022e+06	1.04087e+06	1.07892e+06	1.09731e+06	1.02546e+06	58277.7	5.68305	614535	809726	1.07491e+06	833056	231071	27.7378	945931	1.00875e+06	1.10936e+06	1.02135e+06	82441.9	8.07188	823373	850728	932081	868727	56544.9	6.50894
P36542	ATP synthase subunit gamma, mitochondrial OS=Homo sapiens GN=ATP5C1 PE=1 SV=1 - [ATPG_HUMAN]	GLCGAIHSSIAK	[3] DesthioBiotinIAM(new)	-0.240219	-0.111706	-0.23919	484.94	47.0956	1451.8	3	4.33034	721841	724362	729739	737473	756563	760381	738393	16493.9	2.23375	533457	653320	688631	625136	81335.6	13.0109	646532	687118	716484	683378	35125.8	5.14003	596975	626082	653689	625582	28360.7	4.53348
P19012	Keratin, type I cytoskeletal 15 OS=Homo sapiens GN=KRT15 PE=1 SV=3 - [K1C15_HUMAN]	AGLENSLAETECR	[12] DesthioBiotinIAM(new)	0.10233	-0.0474912	-0.238773	563.617	52.9615	1687.83	3	5.9437	84244.1	96534.1	103481	112518	114601	122272	105608	13781	13.0491	104737	117120	118256	113371	7498.63	6.61423	78623.7	83347.3	144594	102188	36800.4	36.0123	77677	83819.3	107002	89499.4	15465.7	17.2802
Q16658	Fascin OS=Homo sapiens GN=FSCN1 PE=1 SV=3 - [FSCN1_HUMAN]	YFGGTEDRLSCFAQTVSPAEK	[11] DesthioBiotinIAM(new)	-0.0444218	-0.156326	-0.238267	868.095	58.8437	2601.26	3	3.41407	1.29291e+06	1.31327e+06	1.32049e+06	1.34043e+06	1.39339e+06	1.44418e+06	1.35078e+06	57132.2	4.22958	1.27034e+06	1.31907e+06	1.34006e+06	1.30982e+06	35766.4	2.73063	1.05387e+06	1.09188e+06	1.49044e+06	1.21206e+06	241832	19.9521	1.13372e+06	1.13901e+06	1.16269e+06	1.14514e+06	15429.8	1.34741
Q00839	Heterogeneous nuclear ribonucleoprotein U OS=Homo sapiens GN=HNRNPU PE=1 SV=6 - [HNRPU_HUMAN]	KAVVVCPKDEDYK	[6] DesthioBiotinIAM(new)	-0.125694	0.0438559	-0.238133	597.324	40.883	1788.95	3	3.77187	1.13683e+06	1.14892e+06	1.15918e+06	1.20302e+06	1.23307e+06	1.3013e+06	1.19705e+06	62576.6	5.22755	864760	1.2073e+06	1.21946e+06	1.09717e+06	201369	18.3534	1.16674e+06	1.26591e+06	1.26935e+06	1.234e+06	58273.7	4.72234	895202	993686	1.15585e+06	1.01491e+06	131613	12.9679
Q96FW1	Ubiquitin thioesterase OTUB1 OS=Homo sapiens GN=OTUB1 PE=1 SV=2 - [OTUB1_HUMAN]	KTRPDGNCFYR	[8] DesthioBiotinIAM(new)	-0.0375006	0.255058	-0.238007	551.618	40.8627	1651.83	3	3.3722	460160	465541	475129	503586	508859	535426	491450	29329	5.96786	367437	481944	587140	478840	109884	22.948	474136	631077	654252	586488	97987.8	16.7075	358733	431648	459744	416708	52136.6	12.5115
P55209	Nucleosome assembly protein 1-like 1 OS=Homo sapiens GN=NAP1L1 PE=1 SV=1 - [NP1L1_HUMAN]	FEIINAIYEPTEEECEWKPDEEDEISEELKEK	[15] DesthioBiotinIAM(new)	-0.248047	-0.332936	-0.237803	1053.25	67.4758	4208.97	4	4.57839	1.21263e+06	1.28174e+06	1.66472e+06	4.7583e+06	4.99199e+06	5.22701e+06	3.1894e+06	1.98666e+06	62.2895	1.41948e+06	1.76521e+06	4.87208e+06	2.68559e+06	1.90143e+06	70.8012	1.32273e+06	1.73086e+06	4.54278e+06	2.53212e+06	1.7532e+06	69.2381	1.05129e+06	1.2895e+06	5.77339e+06	2.70472e+06	2.66021e+06	98.3541
P35659	Protein DEK OS=Homo sapiens GN=DEK PE=1 SV=1 - [DEK_HUMAN]	LCEIER	[2] DesthioBiotinIAM(new)	-0.27617	-0.227162	-0.236982	529.788	46.6997	1057.56	2	3.01008	421941	432158	445897	453134	481322	486873	453554	26066	5.74706	328925	388724	405959	374536	40429.7	10.7946	333617	371631	457184	387478	63289.4	16.3337	368415	385870	400262	384849	15947.9	4.14394
P40222	Alpha-taxilin OS=Homo sapiens GN=TXLNA PE=1 SV=3 - [TXLNA_HUMAN]	VTEAPCYPGAPSTEASGQTGPQEPTSAR	[6] DesthioBiotinIAM(new)	-0.266204	0.00636809	-0.236981	1029.16	51.8646	3084.46	3	4.95649	1.41134e+06	1.4241e+06	1.48059e+06	1.85308e+06	1.88097e+06	1.92011e+06	1.6617e+06	246339	14.8245	1.118e+06	1.44402e+06	1.58311e+06	1.38171e+06	238733	17.2781	1.50122e+06	1.61987e+06	1.88606e+06	1.66905e+06	197075	11.8076	1.11888e+06	1.22627e+06	1.8848e+06	1.40998e+06	414695	29.4113
O75153	Clustered mitochondria protein homolog OS=Homo sapiens GN=CLUH PE=1 SV=2 - [CLU_HUMAN]	ERPLCPLQPQNR	[5] DesthioBiotinIAM(new)	-0.122296	-0.166543	-0.236745	582.988	47.7721	1745.94	3	4.03699	353581	373181	379476	397033	399596	410532	385567	20809.3	5.39707	330734	355757	376196	354229	22769.7	6.42794	278213	364726	387652	343530	57716.4	16.801	298259	336120	347264	327214	25687.4	7.85033
Q00839	Heterogeneous nuclear ribonucleoprotein U OS=Homo sapiens GN=HNRNPU PE=1 SV=6 - [HNRPU_HUMAN]	MCLFAGFQR	[2] DesthioBiotinIAM(new)	-0.434073	-0.552268	-0.236627	684.853	66.1602	1367.69	2	5.39529	827922	1.14303e+06	1.38266e+06	1.42112e+06	2.05019e+06	2.0817e+06	1.48444e+06	497742	33.5307	654463	739681	1.90206e+06	1.09873e+06	697001	63.4368	936875	1.01638e+06	1.08366e+06	1.01231e+06	73477.9	7.25847	583690	908688	2.28726e+06	1.25988e+06	904458	71.7892
P14868	Aspartate--tRNA ligase, cytoplasmic OS=Homo sapiens GN=DARS PE=1 SV=2 - [SYDC_HUMAN]	LEYCEALAMLR	[4] DesthioBiotinIAM(new)|[9] Oxidation	-0.01128	-0.303818	-0.236433	812.42	62.7482	1622.83	2	5.54302	1.5493e+06	1.73872e+06	1.80277e+06	2.18494e+06	2.21222e+06	2.21858e+06	1.95109e+06	290847	14.9069	1.4835e+06	2.07165e+06	2.25252e+06	1.93589e+06	402084	20.7699	1.09784e+06	1.31658e+06	2.32734e+06	1.58059e+06	655890	41.4966	1.46978e+06	1.51869e+06	1.98003e+06	1.65616e+06	281540	16.9995
O75400	Pre-mRNA-processing factor 40 homolog A OS=Homo sapiens GN=PRPF40A PE=1 SV=2 - [PR40A_HUMAN]	RLSGSSLCSGSWVSADGFLR	[8] DesthioBiotinIAM(new)	-0.106834	-0.105737	-0.23625	794.41	63.0404	2380.21	3	5.33621	228986	254169	260292	528473	559322	650884	413688	186407	45.0599	239997	253615	658870	384160	238003	61.954	261308	295930	596120	384452	184125	47.8928	200680	237974	614946	351200	229171	65.2536
Q92917	G patch domain and KOW motifs-containing protein OS=Homo sapiens GN=GPKOW PE=1 SV=2 - [GPKOW_HUMAN]	GCTPSGEGADSEPR	[2] DesthioBiotinIAM(new)	-0.0172338	-0.386308	-0.236177	829.878	40.9889	1657.74	2	3.47518	518249	518310	523157	556722	569742	598617	547466	33145	6.05426	396441	564071	662384	540965	134469	24.8572	107135	537766	611672	418858	272477	65.0524	445030	455129	494223	464794	25981.7	5.58994
P42677	40S ribosomal protein S27 OS=Homo sapiens GN=RPS27 PE=1 SV=3 - [RS27_HUMAN]	LTEGCSFR	[5] DesthioBiotinIAM(new)	-0.223215	-0.372899	-0.236154	604.811	48.2524	1207.61	2	4.97915	2.32656e+06	2.32777e+06	2.3476e+06	2.45917e+06	2.46451e+06	2.48429e+06	2.40165e+06	74975.6	3.12184	1.57969e+06	2.27268e+06	2.31979e+06	2.05738e+06	414365	20.1404	1.7491e+06	1.87659e+06	1.93818e+06	1.85463e+06	96437.5	5.19984	1.64719e+06	2.0813e+06	2.38856e+06	2.03902e+06	372487	18.268
P12277	Creatine kinase B-type OS=Homo sapiens GN=CKB PE=1 SV=1 - [KCRB_HUMAN]	DYEFMWNPHLGYILTCPSNLGTGLR	[5] Oxidation|[16] DesthioBiotinIAM(new)	-0.0431153	-0.560328	-0.234846	1070.52	73.6414	3208.55	3	1.16828	3.46767e+06	3.79956e+06	3.84783e+06	1.04936e+07	1.22491e+07	1.3011e+07	7.81146e+06	4.57375e+06	58.5518	5.01509e+06	5.25835e+06	1.24709e+07	7.58146e+06	4.23616e+06	55.8753	3.88754e+06	4.20464e+06	7.79979e+06	5.29732e+06	2.17299e+06	41.0206	2.69173e+06	4.81624e+06	1.2406e+07	6.63799e+06	5.10692e+06	76.9349
Q9H814	Phosphorylated adapter RNA export protein OS=Homo sapiens GN=PHAX PE=1 SV=1 - [PHAX_HUMAN]	AFQNTATACAPVSHYR	[9] DesthioBiotinIAM(new)	-0.186539	-0.165668	-0.233923	678.341	46.6997	2032	3	3.50325	1.05249e+06	1.14779e+06	1.15298e+06	1.17556e+06	1.19532e+06	1.25405e+06	1.16303e+06	66390.5	5.70841	725440	1.05896e+06	1.2815e+06	1.02197e+06	279870	27.3854	950195	1.02846e+06	1.13192e+06	1.03686e+06	91154.2	8.79138	933679	1.00319e+06	1.02998e+06	988947	49702.1	5.02576
Q92754	Transcription factor AP-2 gamma OS=Homo sapiens GN=TFAP2C PE=1 SV=1 - [AP2C_HUMAN]	NPLNLPCQK	[7] DesthioBiotinIAM(new)	-0.065133	0.0421448	-0.233759	661.869	53.0508	1321.72	2	4.72669	109616	111589	113518	117029	130275	145447	121246	13951.5	11.5069	87127.5	110457	150096	115893	31834.5	27.4687	94011	108720	171788	124840	41318.2	33.097	83069.4	111808	114450	103109	17405.1	16.8803
Q15906	Vacuolar protein sorting-associated protein 72 homolog OS=Homo sapiens GN=VPS72 PE=1 SV=1 - [VPS72_HUMAN]	KGPHCERPLTQEELLR	[5] DesthioBiotinIAM(new)	-0.218509	0.00648425	-0.233296	551.303	43.8507	2201.18	4	3.73235	327107	327714	333053	336398	344344	353812	337071	10359.2	3.0733	248566	307031	313493	289697	35766.3	12.3461	300019	342130	373620	338590	36928	10.9064	277280	278051	304897	286743	15726.6	5.48456
Q86YV9	Hermansky-Pudlak syndrome 6 protein OS=Homo sapiens GN=HPS6 PE=1 SV=1 - [HPS6_HUMAN]	THVLLHHCPAFGLLASCR	[8] Carbamidomethyl|[17] DesthioBiotinIAM(new)	-0.181942	-0.31007	-0.232927	582.814	52.3637	2327.23	4	5.37802	183983	195100	206795	217958	227618	233699	210859	19183.8	9.09795	176922	188716	191989	185875	7924.75	4.26347	155908	176634	177696	170079	12284.5	7.22283	157158	184973	196133	179421	20071.9	11.187
Q14676	Mediator of DNA damage checkpoint protein 1 OS=Homo sapiens GN=MDC1 PE=1 SV=3 - [MDC1_HUMAN]	AAGNPGSLAAPIDHKPCSAPLEPK	[17] DesthioBiotinIAM(new)	-0.449313	-0.237023	-0.23214	660.104	49.0566	2636.39	4	4.10525	324841	347843	371268	423141	433795	472633	395587	56623.4	14.3138	282885	284407	301882	289725	10555.9	3.64344	237443	368153	401364	335653	86658.5	25.8179	300492	345921	363960	336791	32703.8	9.71042
P36952	Serpin B5 OS=Homo sapiens GN=SERPINB5 PE=1 SV=2 - [SPB5_HUMAN]	QLCEKEPLGNVLFSPICLSTSLSLAQVGAK	[3] Carbamidomethyl|[17] DesthioBiotinIAM(new)	-0.324289	-0.369709	-0.231867	1166.97	75.0388	3497.88	3	3.95577	2.50746e+06	2.65153e+06	2.86038e+06	3.14249e+06	3.23717e+06	3.54485e+06	2.99065e+06	388948	13.0055	1.79751e+06	2.60713e+06	2.76117e+06	2.38861e+06	517662	21.6722	1.77733e+06	2.52515e+06	2.64124e+06	2.31458e+06	468873	20.2574	2.43408e+06	2.48772e+06	2.7181e+06	2.54663e+06	150899	5.92545
Q96S59	Ran-binding protein 9 OS=Homo sapiens GN=RANBP9 PE=1 SV=1 - [RANB9_HUMAN]	GSTAHFSGFESCSNGVISNK	[12] DesthioBiotinIAM(new)	-0.151309	-0.161143	-0.231589	775.706	51.4087	2324.1	3	4.78775	805467	848807	882612	886381	892161	908901	870721	37529.5	4.31016	695943	798164	857971	784026	81933.9	10.4504	685248	709250	941603	778700	141587	18.1825	692299	746234	786238	741590	47141.2	6.35677
Q9C0C2	182 kDa tankyrase-1-binding protein OS=Homo sapiens GN=TNKS1BP1 PE=1 SV=4 - [TB182_HUMAN]	NMAPGAVCSPGESK	[2] Oxidation|[8] DesthioBiotinIAM(new)	-0.380858	-0.169036	-0.231467	830.399	43.4722	1658.78	2	4.5185	271467	288254	326259	356353	379836	445204	344562	63813.1	18.5201	248111	257066	288674	264617	21309.3	8.05289	209835	251371	458193	306466	133030	43.4077	219664	266717	394081	293487	90237.4	30.7466
Q6PL18	ATPase family AAA domain-containing protein 2 OS=Homo sapiens GN=ATAD2 PE=1 SV=1 - [ATAD2_HUMAN]	TPSTPVACSTPAQLKR	[8] DesthioBiotinIAM(new)	-0.210241	0.12755	-0.231255	651.693	46.0187	1952.06	3	3.60417	55309.6	60901.9	63936.7	73189.5	76443.6	77060.4	67806.9	9033.62	13.3226	35156.8	68014.9	72663.8	58611.8	20445.2	34.8824	69150.7	71540.5	81533.3	74074.8	6568.85	8.86786	43915.9	55934.1	73442.9	57764.3	14848.4	25.7051
Q15181	Inorganic pyrophosphatase OS=Homo sapiens GN=PPA1 PE=1 SV=2 - [IPYR_HUMAN]	GISCMNTTLSESPFKCDPDAAR	[4] DesthioBiotinIAM(new)|[5] Oxidation|[16] Carbamidomethyl	-0.197565	-0.525341	-0.231217	904.757	53.8615	2711.25	3	4.80556	632053	726015	730095	782970	889573	935517	782704	112650	14.3924	550372	625703	871528	682534	167951	24.607	402165	441162	788129	543819	212475	39.071	525876	662669	811848	666798	143030	21.4504
Q9BXP5	Serrate RNA effector molecule homolog OS=Homo sapiens GN=SRRT PE=1 SV=1 - [SRRT_HUMAN]	LRECELSPGVNR	[4] DesthioBiotinIAM(new)	-0.331428	-0.35381	-0.231015	556.969	45.6928	1667.89	3	4.88192	615744	672687	682341	744070	764884	777030	709460	62778.6	8.84879	501481	581971	608076	563843	55561.3	9.85405	509859	558826	596803	555163	43587.3	7.85126	582428	615426	615600	604485	19102.1	3.16007
P31947	14-3-3 protein sigma OS=Homo sapiens GN=SFN PE=1 SV=1 - [1433S_HUMAN]	VETELQGVCDTVLGLLDSHLIKEAGDAESR	[9] DesthioBiotinIAM(new)	0.00678979	-0.0202323	-0.230294	874.206	76.4672	3492.8	4	5.65143	1.02489e+06	1.08353e+06	1.10567e+06	1.11863e+06	1.14334e+06	1.15485e+06	1.10515e+06	46946.5	4.24797	1.01985e+06	1.09269e+06	1.21856e+06	1.11037e+06	100528	9.05359	953389	1.13133e+06	1.18457e+06	1.08976e+06	121065	11.1093	823667	904638	1.09799e+06	942099	140948	14.9611
O75533	Splicing factor 3B subunit 1 OS=Homo sapiens GN=SF3B1 PE=1 SV=3 - [SF3B1_HUMAN]	VAIGPCR	[6] DesthioBiotinIAM(new)	-0.256932	-0.0966181	-0.230292	506.294	47.6862	1010.57	2	4.51664	130737	130892	134767	138164	139769	145281	136602	5624.24	4.11725	106391	112173	124388	114317	9188.51	8.03773	118520	130962	133777	127753	8119.25	6.35543	102986	121307	125050	116448	11807.1	10.1394
Q96LD4	Tripartite motif-containing protein 47 OS=Homo sapiens GN=TRIM47 PE=1 SV=2 - [TRI47_HUMAN]	FTHCEQVLGEGALDR	[4] DesthioBiotinIAM(new)	0.0367309	-0.129061	-0.230078	657.665	52.0519	1969.97	3	3.18793	165828	174886	175658	177257	178103	178144	174979	4672.95	2.67058	166444	182126	189904	179491	11949.7	6.65753	141623	164001	174393	160006	16746.1	10.4659	130295	137666	179595	149185	26592	17.8248
Q02790	Peptidyl-prolyl cis-trans isomerase FKBP4 OS=Homo sapiens GN=FKBP4 PE=1 SV=3 - [FKBP4_HUMAN]	TQLAVCQQR	[6] DesthioBiotinIAM(new)	-0.263572	-0.0682451	-0.229489	671.869	46.6997	1341.72	2	3.66942	612697	631405	631746	637467	644043	703836	643532	31338.2	4.86971	517639	536583	554010	536077	18190.8	3.39331	557790	619158	664450	613800	53531.3	8.72129	518466	559697	568514	548893	26716.4	4.86732
Q9Y520	Protein PRRC2C OS=Homo sapiens GN=PRRC2C PE=1 SV=4 - [PRC2C_HUMAN]	IACGPPQAK	[3] DesthioBiotinIAM(new)	-0.0107852	0.0102722	-0.229127	590.831	42.9705	1179.65	2	2.82367	352740	392783	396092	422078	425741	470416	409975	39528	9.64156	352902	428963	438899	406921	47045.4	11.5613	347187	388589	502937	412904	80671.9	19.5377	330452	343878	374980	349770	22841.4	6.53039
P11766	Alcohol dehydrogenase class-3 OS=Homo sapiens GN=ADH5 PE=1 SV=4 - [ADHX_HUMAN]	VCLLGCGISTGYGAAVNTAK	[2] Carbamidomethyl|[6] DesthioBiotinIAM(new)	-0.1381	-0.398599	-0.228999	751.053	62.2417	2250.14	3	-5.31301	665027	730691	748423	753135	762970	799507	743292	44620.2	6.00305	647556	667695	711071	675441	32458.2	4.80549	508631	563081	619860	563857	55618.8	9.86399	593549	649207	659833	634196	35600.4	5.61347
P52888	Thimet oligopeptidase OS=Homo sapiens GN=THOP1 PE=1 SV=2 - [THOP1_HUMAN]	MKPPAACAGDMADAASPCSVVNDLR	[1] Oxidation|[7] Carbamidomethyl|[11] Oxidation|[18] DesthioBiotinIAM(new)	-0.311058	-0.516558	-0.228895	959.115	54.7647	2874.32	3	3.06033	315118	397888	453763	679407	787988	854248	581402	222532	38.2751	272521	464043	669354	468639	198457	42.3474	194909	214641	809715	406422	349401	85.9702	296573	392454	799284	496104	266903	53.7998
Q01433	AMP deaminase 2 OS=Homo sapiens GN=AMPD2 PE=1 SV=2 - [AMPD2_HUMAN]	CGVPFTDLLDAAK	[1] DesthioBiotinIAM(new)	0.0235859	0.113292	-0.228753	823.435	70.686	1644.86	2	1.08215	223052	241572	276414	276554	280158	300153	266317	28380.9	10.6568	263537	270804	277780	270707	7121.79	2.63081	254140	303512	306569	288074	29427.5	10.2153	207543	210326	263935	227268	31785	13.9857
P14866	Heterogeneous nuclear ribonucleoprotein L OS=Homo sapiens GN=HNRNPL PE=1 SV=2 - [HNRPL_HUMAN]	LNVCVSK	[4] DesthioBiotinIAM(new)	-0.272521	0.0382801	-0.227842	529.808	48.2411	1057.6	2	4.8457	1.00282e+06	1.07952e+06	1.12306e+06	1.12626e+06	1.16378e+06	1.19771e+06	1.11553e+06	68195.1	6.11327	882584	885191	1.00276e+06	923512	68645	7.43304	1.0405e+06	1.1824e+06	1.21367e+06	1.14552e+06	92287.8	8.0564	932671	941224	983786	952560	27378.1	2.87416
P25398	40S ribosomal protein S12 OS=Homo sapiens GN=RPS12 PE=1 SV=3 - [RS12_HUMAN]	LVEALCAEHQINLIK	[6] DesthioBiotinIAM(new)	0.0352841	-0.184522	-0.226219	664.046	58.1387	1989.12	3	4.75176	251946	253075	260683	288735	292510	308443	275899	23774	8.61694	263136	282988	302065	282730	19465.6	6.8849	211731	225885	290708	242774	42110.2	17.3454	229313	233634	244627	235858	7895.03	3.34736
Q99439	Calponin-2 OS=Homo sapiens GN=CNN2 PE=1 SV=4 - [CNN2_HUMAN]	AGQCVIGLQMGTNK	[4] DesthioBiotinIAM(new)|[10] Oxidation	-0.242762	-0.245106	-0.226178	866.451	52.7059	1730.89	2	4.11977	1.59687e+06	1.76156e+06	2.30842e+06	2.75383e+06	3.22477e+06	3.36388e+06	2.50156e+06	739410	29.558	1.96597e+06	2.17112e+06	2.2053e+06	2.11413e+06	129447	6.12294	1.23247e+06	1.29341e+06	3.80621e+06	2.1107e+06	1.46867e+06	69.5824	1.39596e+06	1.58605e+06	3.4337e+06	2.13857e+06	1.12564e+06	52.635
Q08379	Golgin subfamily A member 2 OS=Homo sapiens GN=GOLGA2 PE=1 SV=3 - [GOGA2_HUMAN]	EPEAAAPAPGTGGDSVCGETHR	[17] DesthioBiotinIAM(new)	-0.17803	-0.0922252	-0.226159	802.378	44.719	2404.11	3	1.7663	342451	357792	368726	371336	382106	398521	370155	19345.3	5.22627	297043	331526	352982	327184	28221	8.62543	331363	343626	366711	347233	17947.8	5.16882	283541	325032	340773	316449	29565.7	9.34298
Q9UKF6	Cleavage and polyadenylation specificity factor subunit 3 OS=Homo sapiens GN=CPSF3 PE=1 SV=1 - [CPSF3_HUMAN]	RNFNYHILSPCDLSNYTDLAMSTVK	[11] DesthioBiotinIAM(new)|[21] Oxidation	-0.197701	-0.331771	-0.225824	804.401	63.5949	3213.57	4	4.86157	374492	376929	378180	572238	620401	624551	491132	126881	25.8345	345936	395999	542775	428237	102303	23.8893	293535	328884	548282	390234	138010	35.366	392051	412913	454946	419970	32035.7	7.62809
P04843	Dolichyl-diphosphooligosaccharide--protein glycosyltransferase subunit 1 OS=Homo sapiens GN=RPN1 PE=1 SV=1 - [RPN1_HUMAN]	MKVACITEQVLTLVNKR	[1] Oxidation|[5] DesthioBiotinIAM(new)	0.0276319	-0.270866	-0.225801	565.327	61.0965	2257.28	4	5.34092	216270	235516	249278	271276	307814	310265	265070	38503	14.5256	123671	175822	511094	270196	210247	77.813	107167	228839	323080	219696	108246	49.2711	150127	200324	329549	226666	92566.1	40.838
Q27J81	Inverted formin-2 OS=Homo sapiens GN=INF2 PE=1 SV=2 - [INF2_HUMAN]	GPGKQEEVCVIDALLADIR	[9] DesthioBiotinIAM(new)	0.171376	-0.121346	-0.225231	774.758	73.6414	2321.25	3	4.59075	197877	207134	209981	254382	281076	401066	258586	76836.4	29.7141	248537	269533	355536	291202	56695.6	19.4695	203041	243945	266192	237726	32031.5	13.4741	205936	224872	232820	221209	13811	6.24341
P49588	Alanine--tRNA ligase, cytoplasmic OS=Homo sapiens GN=AARS PE=1 SV=2 - [SYAC_HUMAN]	CLSVMEAK	[1] DesthioBiotinIAM(new)|[5] Oxidation	-0.282723	-0.276172	-0.224658	596.809	46.6997	1191.6	2	4.41822	4.68723e+06	4.79704e+06	5.59168e+06	6.85227e+06	7.71433e+06	7.80953e+06	6.24202e+06	1.40893e+06	22.5718	4.66501e+06	5.2446e+06	5.48391e+06	5.13117e+06	421068	8.20608	2.99497e+06	3.70458e+06	8.76403e+06	5.15453e+06	3.14599e+06	61.0336	4.42639e+06	5.01621e+06	6.5831e+06	5.3419e+06	1.11463e+06	20.8659
P62753	40S ribosomal protein S6 OS=Homo sapiens GN=RPS6 PE=1 SV=1 - [RS6_HUMAN]	MKLNISFPATGCQK	[1] Oxidation|[12] DesthioBiotinIAM(new)	-0.111143	-0.659291	-0.224625	617.33	53.252	1848.97	3	4.66895	136034	164529	169155	214827	230476	232675	191283	40153.5	20.9917	97246	215039	219015	177100	69184.2	39.0651	62378.7	79442.4	221534	121118	87379.8	72.1442	125747	178797	186566	163703	33099.5	20.2192
Q9BTT0	Acidic leucine-rich nuclear phosphoprotein 32 family member E OS=Homo sapiens GN=ANP32E PE=1 SV=1 - [AN32E_HUMAN]	CPNLTYLNLSGNK	[1] DesthioBiotinIAM(new)	-0.282156	-0.225121	-0.224602	866.96	60.9544	1731.9	2	4.02168	5.42089e+06	5.53149e+06	5.86448e+06	5.97624e+06	6.31482e+06	6.90918e+06	6.00285e+06	547627	9.12278	4.70631e+06	4.87557e+06	5.22765e+06	4.93651e+06	265955	5.38751	4.74816e+06	5.17834e+06	5.48023e+06	5.13558e+06	367901	7.16377	5.07284e+06	5.1169e+06	5.22254e+06	5.13743e+06	76928.5	1.49741
P35579	Myosin-9 OS=Homo sapiens GN=MYH9 PE=1 SV=4 - [MYH9_HUMAN]	SMMQDREDQSILCTGESGAGK	[2] Oxidation|[13] DesthioBiotinIAM(new)	-0.315761	-0.127414	-0.224332	852.394	49.4154	2554.16	3	5.5482	131376	143612	230353	401445	429055	549455	314216	170706	54.3278	198844	206864	351641	252449	85995.9	34.0646	226939	268903	367124	287655	71948.9	25.0122	130670	219015	457213	268966	168905	62.798
P30044	Peroxiredoxin-5, mitochondrial OS=Homo sapiens GN=PRDX5 PE=1 SV=4 - [PRDX5_HUMAN]	KGVLFGVPGAFTPGCSK	[15] DesthioBiotinIAM(new)	-0.155369	-0.321951	-0.223335	654.363	60.8441	1960.07	3	3.88168	2.86849e+06	2.96292e+06	3.07062e+06	3.11759e+06	3.21479e+06	3.65573e+06	3.14836e+06	276241	8.77412	2.68649e+06	2.83733e+06	2.95695e+06	2.82692e+06	135530	4.79426	2.06296e+06	2.64332e+06	2.84966e+06	2.51865e+06	407896	16.195	2.65765e+06	2.6859e+06	2.74694e+06	2.69683e+06	45640.8	1.69239
P68363	Tubulin alpha-1B chain OS=Homo sapiens GN=TUBA1B PE=1 SV=1 - [TBA1B_HUMAN]	LADQCTGLQGFLVFHSFGGGTGSGFTSLLMER	[5] DesthioBiotinIAM(new)|[30] Oxidation	0.18171	-0.0601774	-0.222986	1215.94	76.4672	3644.8	3	5.42381	8.10243e+06	9.80603e+06	1.04632e+07	1.36687e+07	1.44155e+07	1.51336e+07	1.19316e+07	2.85575e+06	23.9344	8.81425e+06	9.70732e+06	2.20777e+07	1.35331e+07	7.41333e+06	54.7793	7.4572e+06	8.31879e+06	1.85563e+07	1.14441e+07	6.17441e+06	53.9528	6.54606e+06	8.6801e+06	1.54424e+07	1.02228e+07	4.64447e+06	45.4322
O43896	Kinesin-like protein KIF1C OS=Homo sapiens GN=KIF1C PE=1 SV=3 - [KIF1C_HUMAN]	FVPPHDCK	[7] DesthioBiotinIAM(new)	-0.0426436	-0.16115	-0.222678	413.552	41.1407	1237.63	3	4.57355	71423.2	73372.6	78626.2	81885.7	85799.4	86037.4	79524.1	6191.15	7.78525	48092.3	90689	92842.3	77207.9	25237.8	32.6881	46266.5	82754	84337.5	71119.3	21537.8	30.284	62112.7	70871.8	71465.5	68150	5236.89	7.68436
Q5TGY3	AT-hook DNA-binding motif-containing protein 1 OS=Homo sapiens GN=AHDC1 PE=1 SV=1 - [AHDC1_HUMAN]	HGLQGASLGHAAAAQAHLSCR	[20] DesthioBiotinIAM(new)	-0.367418	-0.185795	-0.222541	588.81	43.8916	2351.21	4	4.19659	422438	434585	443610	447142	488974	529229	460996	40291.2	8.74002	323712	360430	387908	357350	32208.3	9.01308	387448	397712	430715	405292	22607.9	5.57817	385965	399260	400072	395099	7920.75	2.00475
P15880	40S ribosomal protein S2 OS=Homo sapiens GN=RPS2 PE=1 SV=2 - [RS2_HUMAN]	GCTATLGNFAK	[2] DesthioBiotinIAM(new)	-0.0695394	-0.332901	-0.222061	689.864	53.2311	1377.71	2	4.87049	1.6679e+06	1.69312e+06	1.84939e+06	1.86397e+06	1.91449e+06	1.92604e+06	1.81915e+06	111533	6.13106	1.56203e+06	1.80534e+06	1.83328e+06	1.73355e+06	149196	8.60639	1.26134e+06	1.37149e+06	1.70005e+06	1.44429e+06	228239	15.8028	1.48066e+06	1.51663e+06	1.6816e+06	1.55963e+06	107147	6.87002
O75410	Transforming acidic coiled-coil-containing protein 1 OS=Homo sapiens GN=TACC1 PE=1 SV=2 - [TACC1_HUMAN]	TCSKPSENEVPQQAIDSHSVK	[2] DesthioBiotinIAM(new)	-0.173971	-0.103313	-0.221865	645.825	42.2806	2579.27	4	2.80699	553127	578586	607888	629768	637904	670860	613022	42531	6.93792	470076	540177	619894	543382	74960.1	13.7951	523647	585791	602535	570658	41564.3	7.28357	496636	530927	549356	525640	26754.8	5.08995
Q01518	Adenylyl cyclase-associated protein 1 OS=Homo sapiens GN=CAP1 PE=1 SV=5 - [CAP1_HUMAN]	ALLVTASQCQQPAENK	[9] DesthioBiotinIAM(new)	-0.115121	-0.168058	-0.221725	666.357	51.7127	1996.05	3	4.23096	1.61974e+06	1.68484e+06	1.69586e+06	1.76339e+06	1.78078e+06	1.89386e+06	1.73974e+06	95220.7	5.47326	1.55342e+06	1.58222e+06	1.6833e+06	1.60631e+06	68211.3	4.24645	1.42675e+06	1.47359e+06	1.74498e+06	1.54844e+06	171810	11.0957	1.36189e+06	1.53149e+06	1.58232e+06	1.4919e+06	115427	7.73694
P12268	Inosine-5'-monophosphate dehydrogenase 2 OS=Homo sapiens GN=IMPDH2 PE=1 SV=2 - [IMDH2_HUMAN]	DIDFLKEEEHDCFLEEIMTK	[12] DesthioBiotinIAM(new)|[18] Oxidation	0.306472	0.241713	-0.220906	699.837	66.9111	2795.32	4	5.76353	405063	420415	426467	597790	599604	615995	510889	102938	20.1488	621075	632207	642136	631806	10536.3	1.66765	465603	623924	722691	604073	129689	21.469	350407	467016	497645	438356	77690.4	17.7231
P04049	RAF proto-oncogene serine/threonine-protein kinase OS=Homo sapiens GN=RAF1 PE=1 SV=1 - [RAF1_HUMAN]	AAHTEDINACTLTTSPR	[10] DesthioBiotinIAM(new)	-0.00361998	0.22849	-0.220714	699.687	48.7156	2096.04	3	3.9724	157707	164279	164544	170324	174517	191589	170493	11821.4	6.93364	157308	171363	181527	170066	12161.8	7.15125	181899	205880	211475	199751	15712	7.86577	97443.2	124123	217355	146307	62958.7	43.0319
P20810	Calpastatin OS=Homo sapiens GN=CAST PE=1 SV=4 - [ICAL_HUMAN]	KEGITGPPADSSKPIGPDDAIDALSSDFTCGSPTAAGK	[30] DesthioBiotinIAM(new)	-0.250327	-0.102295	-0.220705	993.245	63.501	3968.95	4	4.88701	4.74032e+06	4.86241e+06	5.15886e+06	5.17552e+06	5.23315e+06	5.39466e+06	5.09416e+06	244677	4.80308	3.93176e+06	4.01463e+06	4.90168e+06	4.28269e+06	537660	12.5543	4.004e+06	4.42013e+06	5.81225e+06	4.74546e+06	947008	19.9561	4.01433e+06	4.31354e+06	4.78671e+06	4.37153e+06	389442	8.9086
Q6PJ69	Tripartite motif-containing protein 65 OS=Homo sapiens GN=TRIM65 PE=1 SV=3 - [TRI65_HUMAN]	HGRPLELFCR	[9] DesthioBiotinIAM(new)	-0.128426	0.099889	-0.220664	508.616	50.0695	1522.83	3	5.58289	129694	130732	131476	133328	133402	137221	132642	2672.62	2.01491	112573	123525	127936	121345	7910	6.51861	134793	139545	152116	142151	8950.53	6.29649	111922	112785	116781	113829	2592.45	2.27748
P07947	Tyrosine-protein kinase Yes OS=Homo sapiens GN=YES1 PE=1 SV=3 - [YES_HUMAN]	YRPENTPEPVSTSVSHYGAEPTTVSPCPSSSAK	[27] DesthioBiotinIAM(new)	-0.151758	-0.155357	-0.220634	940.459	49.4626	3757.81	4	4.71437	1.62673e+06	1.64598e+06	1.74678e+06	1.75785e+06	1.80395e+06	1.81649e+06	1.73296e+06	79596.1	4.59306	1.16828e+06	1.68786e+06	1.82365e+06	1.55993e+06	345910	22.1747	1.46316e+06	1.59167e+06	1.6133e+06	1.55605e+06	81165.9	5.21617	1.45546e+06	1.49808e+06	1.50809e+06	1.48721e+06	27946.2	1.87911
P60604	Ubiquitin-conjugating enzyme E2 G2 OS=Homo sapiens GN=UBE2G2 PE=1 SV=1 - [UB2G2_HUMAN]	FTCEMFHPNIYPDGR	[3] DesthioBiotinIAM(new)	-0.643564	0.0574	-0.220437	708.336	59.5564	2121.99	3	4.38864	26569.7	28193.3	41039.5	54959.1	55169.7	56047.6	43663.1	13796.8	31.5983	22539.9	24810.8	36499.5	27950.1	7490.56	26.7998	27767.5	42368.9	66169.7	45435.4	19383.9	42.6625	24719.1	26662.6	61047.1	37476.3	20436.1	54.5306
P31146	Coronin-1A OS=Homo sapiens GN=CORO1A PE=1 SV=4 - [COR1A_HUMAN]	RCEPIAMTVPR	[2] DesthioBiotinIAM(new)|[7] Oxidation	-0.457625	-0.29467	-0.219621	528.951	44.6879	1583.83	3	2.20113	122232	126345	128396	132927	136687	141892	131413	7197.07	5.47667	87980.3	90341.6	108757	95693	11375.3	11.8873	79717.5	110825	130865	107136	25772.5	24.056	107051	108659	122860	112856	8700.68	7.70951
Q99661	Kinesin-like protein KIF2C OS=Homo sapiens GN=KIF2C PE=1 SV=2 - [KIF2C_HUMAN]	ATLECHPLTMTDPIEEHR	[5] DesthioBiotinIAM(new)|[10] Oxidation	-0.43194	-0.697566	-0.21889	602.049	49.0566	2404.17	4	5.85372	461737	475409	551270	563586	665024	728270	574216	104912	18.2705	382067	423654	471216	425646	44608	10.4801	261784	298940	501482	354068	129008	36.436	375526	538676	565942	493382	102972	20.8707
O95299	NADH dehydrogenase [ubiquinone] 1 alpha subcomplex subunit 10, mitochondrial OS=Homo sapiens GN=NDUFA10 PE=1 SV=1 - [NDUAA_HUMAN]	VITVDGNICTGK	[9] DesthioBiotinIAM(new)	-0.343386	-0.362254	-0.218518	758.418	53.3145	1514.82	2	5.53857	146029	149279	151774	156570	158049	158572	153379	5145.15	3.35453	106226	125424	131026	120892	13006.2	10.7586	114620	118743	124599	119321	5014.12	4.20221	122455	136390	136618	131821	8111.8	6.15364
Q9Y618	Nuclear receptor corepressor 2 OS=Homo sapiens GN=NCOR2 PE=1 SV=2 - [NCOR2_HUMAN]	SPAPGLASGDRPPSVSSVHSEGDCNRR	[24] DesthioBiotinIAM(new)	-0.478578	-0.184465	-0.218283	607.103	42.8179	3030.48	5	3.91665	560642	595096	641048	668290	742025	762503	661601	79664.3	12.0411	440665	460329	523468	474821	43261.9	9.11121	537449	582361	626767	582192	44659.2	7.67086	443526	587098	675488	568704	117070	20.5854
Q8N163	DBIRD complex subunit KIAA1967 OS=Homo sapiens GN=KIAA1967 PE=1 SV=2 - [K1967_HUMAN]	VHLTPYTVDSPICDFLELQR	[13] DesthioBiotinIAM(new)	-0.112063	-0.368525	-0.217566	881.465	71.449	2641.37	3	5.59691	1.98413e+06	2.0003e+06	2.05834e+06	2.27313e+06	2.35789e+06	2.36154e+06	2.17256e+06	177990	8.19265	1.908e+06	2.03415e+06	2.08842e+06	2.01019e+06	92565.6	4.60483	1.49577e+06	1.65393e+06	1.89871e+06	1.6828e+06	203016	12.0641	1.82932e+06	1.85991e+06	1.91606e+06	1.86843e+06	43995	2.35465
P20810	Calpastatin OS=Homo sapiens GN=CAST PE=1 SV=4 - [ICAL_HUMAN]	KPADDQDPIDALSGDLDSCPSTTETSQNTAKDK	[19] DesthioBiotinIAM(new)	-0.170515	-0.192255	-0.21664	940.698	57.6472	3758.76	4	5.43508	1.1369e+06	1.16926e+06	1.22453e+06	1.3105e+06	1.36548e+06	1.37725e+06	1.26399e+06	101956	8.06625	992557	1.14247e+06	1.23423e+06	1.12308e+06	121997	10.8627	864229	1.00761e+06	1.44703e+06	1.10629e+06	303673	27.4497	988662	1.08369e+06	1.19089e+06	1.08775e+06	101175	9.30136
P62191	26S protease regulatory subunit 4 OS=Homo sapiens GN=PSMC1 PE=1 SV=1 - [PRS4_HUMAN]	LPLVTPHTQCR	[10] DesthioBiotinIAM(new)	-0.159347	-0.298538	-0.216488	520.963	48.1806	1559.87	3	4.6167	496226	498786	523984	538299	549103	569274	529279	28720.4	5.42633	440012	470034	511751	473932	36027.6	7.60185	400123	420081	470828	430344	36452.7	8.4706	412525	474818	479241	455528	37307.6	8.18997
Q9Y2D5	A-kinase anchor protein 2 OS=Homo sapiens GN=AKAP2 PE=1 SV=3 - [AKAP2_HUMAN]	RAQQEQLLLQKQLQQQQQQPPSQLCTAPASSHER	[25] DesthioBiotinIAM(new)	0.112251	0.285774	-0.216138	1056.3	52.856	4221.16	4	-4.23195	3.09626e+06	3.39044e+06	3.69846e+06	3.78451e+06	4.67525e+06	5.3557e+06	4.00011e+06	850828	21.2701	3.72536e+06	4.50422e+06	4.74173e+06	4.32377e+06	531672	12.2965	3.34578e+06	5.23929e+06	6.04408e+06	4.87638e+06	1.38527e+06	28.4077	2.97617e+06	3.11959e+06	4.23491e+06	3.44356e+06	689074	20.0105
P08238	Heat shock protein HSP 90-beta OS=Homo sapiens GN=HSP90AB1 PE=1 SV=4 - [HS90B_HUMAN]	AKFENLCK	[7] DesthioBiotinIAM(new)	-0.139683	-0.242462	-0.215875	624.844	43.7737	1247.67	2	3.1257	342328	369583	378536	382561	394070	421546	381437	26260.5	6.88463	306020	332428	400265	346238	48616.6	14.0414	294149	316994	356146	322430	31353.8	9.72423	317144	326272	341864	328427	12499.9	3.80599
P09382	Galectin-1 OS=Homo sapiens GN=LGALS1 PE=1 SV=2 - [LEG1_HUMAN]	DSNNLCLHFNPR	[6] DesthioBiotinIAM(new)	-0.251786	-0.679457	-0.215255	575.957	55.2174	1724.85	3	3.6856	825889	856730	859239	862561	901115	1.00608e+06	885270	63845.4	7.21197	696947	742368	791183	743499	47128.4	6.33873	468469	574922	614897	552763	75686.9	13.6925	719175	751801	816722	762566	49656.7	6.51179
Q9UNH7	Sorting nexin-6 OS=Homo sapiens GN=SNX6 PE=1 SV=1 - [SNX6_HUMAN]	TVAMHEVFLCR	[4] Oxidation|[10] DesthioBiotinIAM(new)	-0.50218	-0.550825	-0.21482	539.948	49.9868	1616.82	3	4.18994	158492	165709	167372	265781	289962	310082	226233	69817.8	30.861	135561	145161	198466	159729	33888.4	21.2161	113960	115304	234037	154434	68942.1	44.6419	157501	167481	259822	194935	56415.3	28.9406
O75439	Mitochondrial-processing peptidase subunit beta OS=Homo sapiens GN=PMPCB PE=1 SV=2 - [MPPB_HUMAN]	TNMLLQLDGSTPICEDIGR	[3] Oxidation|[14] DesthioBiotinIAM(new)	-0.14936	-0.429953	-0.214659	796.738	65.8876	2387.19	3	4.34863	596172	598239	619419	694899	767524	774838	675182	82606.7	12.2347	563261	596130	666942	608778	52985.4	8.70357	360385	491045	652103	501178	146123	29.1559	525938	565583	653992	581838	65556.2	11.2671
Q09666	Neuroblast differentiation-associated protein AHNAK OS=Homo sapiens GN=AHNAK PE=1 SV=2 - [AHNK_HUMAN]	VKGDVDVSVPKLEGDLTGPSVGVEVPDVELECPDAK	[32] DesthioBiotinIAM(new)	-0.244979	-0.156591	-0.214434	997.772	65.8381	3987.06	4	4.44515	2.98433e+07	3.32513e+07	3.34515e+07	3.35341e+07	3.9222e+07	4.2521e+07	3.53039e+07	4.64829e+06	13.1665	2.62546e+07	3.13961e+07	3.17205e+07	2.97904e+07	3.06637e+06	10.2932	2.56233e+07	2.98532e+07	3.95412e+07	3.16726e+07	7.13512e+06	22.5277	2.7524e+07	3.18068e+07	3.19526e+07	3.04278e+07	2.5158e+06	8.26809
Q9HAU0	Pleckstrin homology domain-containing family A member 5 OS=Homo sapiens GN=PLEKHA5 PE=1 SV=1 - [PKHA5_HUMAN]	SAVEQLCLAESTRPR	[7] DesthioBiotinIAM(new)	0.0654165	0.265276	-0.213975	652.685	52.0029	1955.03	3	4.11643	153079	160134	162349	168591	175020	178866	166340	9670.71	5.81382	87741.8	207406	227021	174056	75391	43.3142	146264	221808	231683	199918	46727.8	23.3735	107727	131962	190545	143411	42579.4	29.6903
P58546	Myotrophin OS=Homo sapiens GN=MTPN PE=1 SV=2 - [MTPN_HUMAN]	KPLHYAADCGQLEILEFLLLK	[9] DesthioBiotinIAM(new)	0.114592	0.271353	-0.213705	678.383	74.7077	2709.5	4	3.91228	960688	968253	1.19698e+06	1.24441e+06	1.39185e+06	1.74337e+06	1.25093e+06	293073	23.4285	1.248e+06	1.27521e+06	1.53979e+06	1.35434e+06	161185	11.9014	1.39473e+06	1.41242e+06	1.72222e+06	1.50979e+06	184185	12.1994	899621	955536	1.38094e+06	1.0787e+06	263235	24.403
P52943	Cysteine-rich protein 2 OS=Homo sapiens GN=CRIP2 PE=1 SV=1 - [CRIP2_HUMAN]	TLTPGGHAEHDGQPYCHKPCYGILFGPK	[16] DesthioBiotinIAM(new)|[20] Carbamidomethyl	-0.130188	-0.518841	-0.212275	676.136	49.8723	3375.64	5	4.66912	7.62717e+06	8.13256e+06	8.78016e+06	1.07889e+07	1.15255e+07	1.32543e+07	1.00181e+07	2.19742e+06	21.9345	7.3898e+06	9.52105e+06	1.05501e+07	9.15364e+06	1.61186e+06	17.6089	6.57642e+06	6.6262e+06	7.7732e+06	6.99194e+06	677052	9.68332	6.07194e+06	7.19768e+06	1.26725e+07	8.64736e+06	3.53099e+06	40.8331
Q8N163	DBIRD complex subunit KIAA1967 OS=Homo sapiens GN=KIAA1967 PE=1 SV=2 - [K1967_HUMAN]	VVTQNICQYR	[7] DesthioBiotinIAM(new)	-0.248701	-0.228927	-0.212241	760.409	49.5672	1518.8	2	4.18442	237041	242956	265884	266459	269962	290929	262205	19598.9	7.47463	209039	216716	236303	220686	14058.8	6.37049	212515	228030	230650	223732	9801.83	4.38107	201572	231202	246229	226334	22722.6	10.0394
P18754	Regulator of chromosome condensation OS=Homo sapiens GN=RCC1 PE=1 SV=1 - [RCC1_HUMAN]	SGQVYSFGCNDEGALGR	[9] DesthioBiotinIAM(new)	-0.108899	-0.35412	-0.212155	685.994	57.6315	2054.96	3	5.51119	540328	547161	561889	613731	677873	680009	603498	63852.7	10.5804	536469	556149	586245	559621	25069	4.47964	400200	451152	565083	472145	84422.5	17.8806	508148	517936	536820	520968	14574.6	2.7976
P13796	Plastin-2 OS=Homo sapiens GN=LCP1 PE=1 SV=6 - [PLSL_HUMAN]	EGICAIGGTSEQSSVGTQHSYSEEEK	[4] DesthioBiotinIAM(new)	-0.18662	-0.278501	-0.210563	1003.8	49.8633	3008.38	3	4.4403	746825	779011	899990	900125	935026	937151	866355	82360.2	9.50653	748049	763407	772243	761233	12242.6	1.60826	611570	739975	791247	714264	92556.7	12.9583	662593	741604	841915	748704	89871.3	12.0036
P33316	Deoxyuridine 5'-triphosphate nucleotidohydrolase, mitochondrial OS=Homo sapiens GN=DUT PE=1 SV=4 - [DUT_HUMAN]	TDIQIALPSGCYGR	[11] DesthioBiotinIAM(new)	-0.137926	-0.846858	-0.21042	597.316	62.2259	1788.93	3	4.60014	121979	127610	142431	143343	145711	146948	138004	10510.2	7.6159	88107.3	139918	148238	125421	32581.4	25.9776	59795.6	69058.4	101334	76729.2	21805.6	28.4189	110564	119427	127833	119275	8635.13	7.2397
Q9UGI8	Testin OS=Homo sapiens GN=TES PE=1 SV=1 - [TES_HUMAN]	YKSEALGVGDVKLPCEMDAQGPK	[15] DesthioBiotinIAM(new)|[17] Oxidation	-0.135468	-0.261136	-0.210023	687.602	53.2728	2746.38	4	4.77826	1.61148e+06	1.78836e+06	1.7998e+06	2.09418e+06	2.26652e+06	2.27552e+06	1.97264e+06	278260	14.1059	1.33658e+06	1.52126e+06	2.5297e+06	1.79584e+06	642210	35.7609	1.01075e+06	1.09934e+06	2.82801e+06	1.64603e+06	1.02458e+06	62.2453	1.40922e+06	1.78154e+06	1.92543e+06	1.7054e+06	266397	15.6208
Q12905	Interleukin enhancer-binding factor 2 OS=Homo sapiens GN=ILF2 PE=1 SV=2 - [ILF2_HUMAN]	GGPGGGFRPFVPHIPFDFYLCEMAFPR	[21] DesthioBiotinIAM(new)	-0.716693	-0.170654	-0.209993	827.662	75.1015	3306.62	4	-1.63004	2.54982e+06	2.59686e+06	3.23595e+06	3.33986e+06	3.65849e+06	4.69503e+06	3.346e+06	790543	23.6265	1.14904e+06	2.33216e+06	2.62683e+06	2.03601e+06	782144	38.4155	2.68888e+06	2.82179e+06	3.40749e+06	2.97272e+06	382346	12.8618	1.31067e+06	2.33731e+06	5.03029e+06	2.89276e+06	1.92101e+06	66.4075
Q9UGI8	Testin OS=Homo sapiens GN=TES PE=1 SV=1 - [TES_HUMAN]	LPCEMDAQGPK	[3] DesthioBiotinIAM(new)|[5] Oxidation	-0.299199	-0.420714	-0.209893	750.865	45.0374	1499.72	2	2.54349	1.14054e+06	1.16132e+06	1.22388e+06	1.22517e+06	1.46711e+06	1.47811e+06	1.28269e+06	150936	11.7672	793301	1.1015e+06	1.23253e+06	1.04245e+06	225493	21.6311	712997	915816	1.2459e+06	958239	268974	28.0696	984550	1.09283e+06	1.24967e+06	1.10901e+06	133297	12.0194
P62280	40S ribosomal protein S11 OS=Homo sapiens GN=RPS11 PE=1 SV=3 - [RS11_HUMAN]	KCPFTGNVSIR	[2] DesthioBiotinIAM(new)	0.0303791	-0.296668	-0.209851	506.616	49.6825	1516.83	3	5.41573	119450	121466	126225	134748	151142	159618	135442	16537.7	12.2102	119172	139177	156622	138324	18739.6	13.5476	100947	107210	122645	110267	11167.7	10.1278	104680	122901	123738	117106	10770.1	9.19686
Q9NZQ3	NCK-interacting protein with SH3 domain OS=Homo sapiens GN=NCKIPSD PE=1 SV=1 - [SPN90_HUMAN]	CYLEELLHILTDADPEVCKK	[1] DesthioBiotinIAM(new)|[18] Carbamidomethyl	-0.305149	-0.00390981	-0.209727	672.1	77.9929	2684.37	4	5.8185	149991	157856	159864	177066	182994	183118	168482	14336	8.50895	120188	133600	155298	136362	17717.2	12.9928	165008	166216	172852	168026	4223.21	2.51343	133716	151023	152320	145686	10386.9	7.12962
Q9UBQ5	Eukaryotic translation initiation factor 3 subunit K OS=Homo sapiens GN=EIF3K PE=1 SV=1 - [EIF3K_HUMAN]	CMIDQAHQEERPIR	[1] DesthioBiotinIAM(new)|[2] Oxidation	-0.355788	-0.102213	-0.209268	510.256	40.005	2036.99	4	3.22269	190724	205064	222324	273328	279800	286220	242910	41812.4	17.2131	160849	188545	220067	189820	29629.8	15.6094	163792	242602	272493	226296	56155.2	24.815	195006	201528	233799	210111	20772.1	9.88621
Q08379	Golgin subfamily A member 2 OS=Homo sapiens GN=GOLGA2 PE=1 SV=3 - [GOGA2_HUMAN]	MQQMSEQVHTLREEKECSMSR	[1] Oxidation|[4] Oxidation|[17] DesthioBiotinIAM(new)	-0.392441	-0.0913214	-0.209204	579.871	38.6065	2894.32	5	1.86253	71858.1	85759	98017.4	154214	156904	226680	132239	58288.4	44.0782	80639.3	97807.3	123787	100745	21723.5	21.5629	72975.4	126906	172501	124127	49820.9	40.1369	67969.8	96181.3	179014	114388	57717.6	50.4576
P42166	Lamina-associated polypeptide 2, isoform alpha OS=Homo sapiens GN=TMPO PE=1 SV=2 - [LAP2A_HUMAN]	SGIQPLCPER	[7] DesthioBiotinIAM(new)	-0.0562937	0.0849591	-0.208518	698.377	52.5237	1394.74	2	4.47124	1.5323e+06	1.53744e+06	1.55646e+06	1.65757e+06	1.93095e+06	1.95446e+06	1.69486e+06	197425	11.6484	1.52697e+06	1.67995e+06	1.68308e+06	1.63e+06	89240.8	5.47489	1.52893e+06	1.89746e+06	1.96661e+06	1.79767e+06	235289	13.0886	1.44644e+06	1.44716e+06	1.50673e+06	1.46678e+06	34604.8	2.35924
P58107	Epiplakin OS=Homo sapiens GN=EPPK1 PE=1 SV=2 - [EPIPL_HUMAN]	TSYAQLLEECPRDETSGLHLLPLPESAPALPTEEQVQR	[10] DesthioBiotinIAM(new)	-0.0918742	-0.583064	-0.208397	1129.33	68.8717	4513.3	4	4.34453	1.88806e+06	1.93617e+06	1.9426e+06	1.99083e+06	2.0194e+06	2.05381e+06	1.97181e+06	60809.5	3.08394	1.7461e+06	1.79911e+06	2.00526e+06	1.85016e+06	136912	7.4	1.08904e+06	1.32157e+06	1.5382e+06	1.31627e+06	224628	17.0655	1.51716e+06	1.74657e+06	1.85607e+06	1.7066e+06	172955	10.1345
Q9C0C2	182 kDa tankyrase-1-binding protein OS=Homo sapiens GN=TNKS1BP1 PE=1 SV=4 - [TB182_HUMAN]	SCKVPGLGKPLTLPPKPEK	[2] DesthioBiotinIAM(new)	-0.125143	0.0178889	-0.208392	572.093	48.9906	2284.34	4	4.67684	862634	902340	917544	917803	923447	953361	912855	29772.7	3.26149	666396	922045	922584	837008	147755	17.6528	854093	943334	975306	924244	62821	6.79701	773753	789722	806757	790077	16505	2.08903
Q86UA6	RPA-interacting protein OS=Homo sapiens GN=RPAIN PE=1 SV=1 - [RIP_HUMAN]	ACLEGSINEHSAHCPHTPEFSVTGGTEEK	[2] DesthioBiotinIAM(new)|[14] Carbamidomethyl	-0.184469	-0.322378	-0.208294	684.92	48.5348	3419.56	5	3.93587	771643	785163	804084	808590	827284	854419	808531	29610.7	3.66228	668899	707900	757655	711485	44486.7	6.25266	594924	644911	700033	646623	52575.3	8.13075	670372	680225	748898	699832	42777.5	6.11255
O95793	Double-stranded RNA-binding protein Staufen homolog 1 OS=Homo sapiens GN=STAU1 PE=1 SV=2 - [STAU1_HUMAN]	TGNGPMSVCGR	[6] Oxidation|[9] DesthioBiotinIAM(new)	-0.195644	-0.669268	-0.207964	695.834	41.3706	1389.65	2	3.64276	491055	617138	623627	686429	758427	820427	666184	116273	17.4535	419429	662532	663141	581701	140532	24.1587	59831.7	488369	708539	418913	329884	78.7475	485840	539104	705319	576754	114481	19.8492
P52732	Kinesin-like protein KIF11 OS=Homo sapiens GN=KIF11 PE=1 SV=2 - [KIF11_HUMAN]	LNCFLEQDLKLDIPTGTTPQRK	[3] DesthioBiotinIAM(new)	-0.0213055	-0.195143	-0.207286	707.388	62.2417	2825.52	4	4.71449	270453	276783	292583	304943	304987	320866	295103	19014.8	6.44347	232344	260347	379639	290777	78220.5	26.9005	230222	270597	272486	257768	23874.8	9.26211	218298	248225	300300	255608	41496.8	16.2346
P20810	Calpastatin OS=Homo sapiens GN=CAST PE=1 SV=4 - [ICAL_HUMAN]	SEDSKKPADDQDPIDALSGDLDSCPSTTETSQNTAK	[24] DesthioBiotinIAM(new)	-0.0979782	0.0122702	-0.206922	1016.47	58.072	4061.87	4	4.42952	6.35613e+06	7.2321e+06	7.28182e+06	7.46003e+06	7.60088e+06	7.65044e+06	7.26357e+06	474724	6.53568	6.56097e+06	6.81856e+06	6.98042e+06	6.78665e+06	211537	3.11695	5.77704e+06	7.30225e+06	8.89753e+06	7.32561e+06	1.56038e+06	21.3003	5.70921e+06	5.96669e+06	7.2032e+06	6.29304e+06	798672	12.6914
P51858	Hepatoma-derived growth factor OS=Homo sapiens GN=HDGF PE=1 SV=1 - [HDGF_HUMAN]	KSCVEEPEPEPEAAEGDGDKK	[3] DesthioBiotinIAM(new)	-0.242293	0.10255	-0.206396	635.804	41.1735	2539.19	4	4.22512	1.28341e+06	1.28612e+06	1.30838e+06	1.33937e+06	1.39394e+06	1.44007e+06	1.34188e+06	63255.5	4.71393	831007	1.25433e+06	1.31795e+06	1.13443e+06	264689	23.3324	1.27361e+06	1.43804e+06	1.61056e+06	1.44074e+06	168491	11.6948	1.08399e+06	1.18226e+06	1.22278e+06	1.16301e+06	71370	6.13667
Q9P258	Protein RCC2 OS=Homo sapiens GN=RCC2 PE=1 SV=2 - [RCC2_HUMAN]	YGCLAGVR	[3] DesthioBiotinIAM(new)	-0.163678	-0.169725	-0.20618	567.811	50.6856	1133.61	2	4.77499	1.0225e+06	1.09901e+06	1.10325e+06	1.11781e+06	1.1305e+06	1.14629e+06	1.10323e+06	43233.8	3.91885	946197	984090	1.02442e+06	984902	39117.1	3.97167	864991	1.03007e+06	1.04729e+06	980782	100647	10.2619	875815	901145	1.09197e+06	956310	118166	12.3564
Q9BV86	N-terminal Xaa-Pro-Lys N-methyltransferase 1 OS=Homo sapiens GN=NTMT1 PE=1 SV=3 - [NTM1A_HUMAN]	EGPNKTGTSCALDCGAGIGR	[10] DesthioBiotinIAM(new)|[14] Carbamidomethyl	-0.2053	0.00533025	-0.205423	754.035	47.5936	2259.08	3	4.46671	272380	293624	296925	299606	314074	319040	299275	16556.5	5.53221	231175	254844	292716	259578	31042.7	11.9589	249351	263537	388259	300382	76433	25.4452	254313	255814	268541	259556	7817.34	3.01181
Q5T0Z8	Uncharacterized protein C6orf132 OS=Homo sapiens GN=C6orf132 PE=1 SV=4 - [CF132_HUMAN]	TSPGGGEVPCLYKPHCHQSSLSR	[10] Carbamidomethyl|[16] DesthioBiotinIAM(new)	-0.685287	-0.339954	-0.205336	559.478	44.5425	2792.36	5	2.5995	285274	292144	297801	421605	452923	483560	372218	90397.3	24.2861	202151	235091	257185	231476	27694.3	11.9643	257091	289970	335170	294077	39201.2	13.3302	226033	340859	401623	322838	89171.5	27.6211
P30153	Serine/threonine-protein phosphatase 2A 65 kDa regulatory subunit A alpha isoform OS=Homo sapiens GN=PPP2R1A PE=1 SV=4 - [2AAA_HUMAN]	ENVIMSQILPCIK	[5] Oxidation|[11] DesthioBiotinIAM(new)	-0.553646	-0.395673	-0.204569	600.666	64.0453	1798.98	3	3.79135	348855	379095	379157	433760	480306	528087	424877	68948.3	16.2278	256730	269325	342346	289467	46225.9	15.9693	226573	276941	465377	322964	125879	38.9761	314497	371887	419738	368707	52692.1	14.291
Q14103	Heterogeneous nuclear ribonucleoprotein D0 OS=Homo sapiens GN=HNRNPD PE=1 SV=1 - [HNRPD_HUMAN]	GFCFITFKEEEPVKK	[3] DesthioBiotinIAM(new)	-0.10506	-0.339937	-0.204351	525.284	57.8256	2097.11	4	5.67577	658168	658976	667999	741722	782006	805931	719134	66253.3	9.21293	583695	650620	771563	668626	95219.4	14.241	533881	570512	600116	568170	33179.4	5.83969	585602	615986	670882	624157	43223.3	6.92506
Q68CZ2	Tensin-3 OS=Homo sapiens GN=TNS3 PE=1 SV=2 - [TENS3_HUMAN]	CPADNPGLVQAQPR	[1] DesthioBiotinIAM(new)	-0.38065	-0.184481	-0.204001	881.462	49.8858	1760.91	2	5.44752	426387	456138	465098	470062	486850	491983	466086	23636.9	5.07137	291829	388953	393209	357997	57342.8	16.0177	400876	401386	428158	410140	15605.9	3.80503	403356	405232	405296	404628	1102.31	0.272426
P48431	Transcription factor SOX-2 OS=Homo sapiens GN=SOX2 PE=1 SV=1 - [SOX2_HUMAN]	APCQAGDLR	[3] DesthioBiotinIAM(new)	-0.108157	-0.269665	-0.203984	613.821	44.1627	1225.63	2	2.34619	656160	687980	743635	778715	831543	848685	757786	76865.7	10.1434	674916	679817	754428	703053	44558.9	6.33791	598909	638834	648035	628593	26115.4	4.15458	505750	715787	752080	657872	132986	20.2145
Q9Y316	Protein MEMO1 OS=Homo sapiens GN=MEMO1 PE=1 SV=1 - [MEMO1_HUMAN]	AIIAPHAGYTYCGSCAAHAYK	[12] Carbamidomethyl|[15] DesthioBiotinIAM(new)	-0.172537	-0.131002	-0.203342	631.06	47.4967	2520.21	4	3.416	400878	402339	407667	431777	445481	467980	426020	27211.3	6.38731	305037	404916	424046	378000	63907.6	16.9068	380738	386461	399922	389040	9848.89	2.53158	353017	354544	402481	370014	28127.8	7.60183
Q9Y261	Hepatocyte nuclear factor 3-beta OS=Homo sapiens GN=FOXA2 PE=1 SV=1 - [FOXA2_HUMAN]	AAAGAQASQAQLGEAAGPASETPAGTESPHSSASPCQEHK	[36] DesthioBiotinIAM(new)	-0.272116	-0.0530974	-0.202696	1021.74	44.3561	4082.91	4	3.42311	849617	852402	913048	949258	1.0041e+06	1.03757e+06	934332	77575.2	8.30275	712708	798683	809781	773724	53132.2	6.86708	863853	886968	950887	900569	45082.9	5.00605	780553	796615	858426	811864	41115.2	5.06429
P26368	Splicing factor U2AF 65 kDa subunit OS=Homo sapiens GN=U2AF2 PE=1 SV=4 - [U2AF2_HUMAN]	IFVEFTSVFDCQK	[11] DesthioBiotinIAM(new)	-0.427737	-0.503703	-0.202442	929.981	71.8665	1857.95	2	7.41704	1.11331e+06	1.2096e+06	1.24402e+06	1.28611e+06	1.31862e+06	1.47976e+06	1.27524e+06	122748	9.62547	911989	927536	1.00461e+06	948046	49601.5	5.23197	848186	867377	982690	899418	72751.4	8.08872	1.0367e+06	1.08358e+06	1.20456e+06	1.10828e+06	86614.6	7.81522
P04350	Tubulin beta-4A chain OS=Homo sapiens GN=TUBB4A PE=1 SV=2 - [TBB4A_HUMAN]	LTTPTYGDLNHLVSATMSGVTTCLR	[23] DesthioBiotinIAM(new)	0.124235	0.157341	-0.202435	983.175	73.657	2946.5	3	2.91316	1.42305e+07	2.20201e+07	2.54172e+07	3.97267e+07	5.38358e+07	5.86196e+07	3.56417e+07	1.80234e+07	50.5685	3.48251e+07	3.56468e+07	4.60688e+07	3.88469e+07	6.26786e+06	16.1348	1.81527e+07	1.91981e+07	8.18951e+07	3.97487e+07	3.65036e+07	91.8361	8.95889e+06	3.23708e+07	5.1597e+07	3.09756e+07	2.13533e+07	68.9358
O75410	Transforming acidic coiled-coil-containing protein 1 OS=Homo sapiens GN=TACC1 PE=1 SV=2 - [TACC1_HUMAN]	AGNSCPELVPSRR	[5] DesthioBiotinIAM(new)	-0.199879	-0.147174	-0.202355	561.3	45.5853	1680.88	3	3.65729	141585	145982	146611	149048	150223	159598	148841	6057.41	4.06971	121294	131903	135557	129585	7408.6	5.71719	122574	139887	140758	134406	10256.5	7.631	111494	135295	141298	129362	15762.9	12.1851
Q9NQW6	Actin-binding protein anillin OS=Homo sapiens GN=ANLN PE=1 SV=2 - [ANLN_HUMAN]	SCEGQNPELLPK	[2] DesthioBiotinIAM(new)	-0.139614	0.0271841	-0.202182	805.917	51.4617	1609.82	2	4.3038	267551	280367	284083	285399	286733	297456	283598	9729.31	3.43067	248183	249174	274962	257440	15182.5	5.89751	273210	276278	317490	288993	24727.3	8.55639	218366	255550	265625	246514	24891.9	10.0976
P20810	Calpastatin OS=Homo sapiens GN=CAST PE=1 SV=4 - [ICAL_HUMAN]	AAAPAPVSEAVCR	[12] DesthioBiotinIAM(new)	-0.165907	-0.0556853	-0.202074	769.415	50.0267	1536.81	2	4.19463	4.12349e+06	4.12712e+06	4.25242e+06	4.32587e+06	4.51067e+06	4.61962e+06	4.32653e+06	203123	4.69483	2.92961e+06	4.19631e+06	4.44367e+06	3.85653e+06	812210	21.0606	3.99955e+06	4.22401e+06	4.26459e+06	4.16272e+06	142756	3.4294	3.5077e+06	3.78864e+06	3.98683e+06	3.76105e+06	240754	6.40125
P02545	Prelamin-A/C OS=Homo sapiens GN=LMNA PE=1 SV=1 - [LMNA_HUMAN]	TVLCGTCGQPADKASASGSGAQVGGPISSGSSASSVTVTR	[4] DesthioBiotinIAM(new)|[7] Carbamidomethyl	-0.10288	-0.0894549	-0.202013	998.746	51.317	3990.96	4	4.71228	7.6683e+06	7.74292e+06	8.3571e+06	8.82001e+06	9.04693e+06	9.49505e+06	8.52172e+06	731319	8.58182	7.37179e+06	7.92125e+06	8.51251e+06	7.93518e+06	570490	7.18937	7.39478e+06	7.56342e+06	9.06992e+06	8.00937e+06	922325	11.5156	6.93785e+06	7.49669e+06	7.79018e+06	7.40824e+06	432997	5.8448
O15294	UDP-N-acetylglucosamine--peptide N-acetylglucosaminyltransferase 110 kDa subunit OS=Homo sapiens GN=OGT PE=1 SV=3 - [OGT1_HUMAN]	VMAEANHFIDLSQIPCNGK	[2] Oxidation|[16] DesthioBiotinIAM(new)	-0.303632	-0.302477	-0.201673	800.403	58.8634	2398.19	3	4.43949	4.69877e+06	5.12863e+06	5.77543e+06	6.79426e+06	7.12736e+06	7.27544e+06	6.13331e+06	1.08856e+06	17.7483	3.54854e+06	4.27587e+06	7.0834e+06	4.96927e+06	1.86665e+06	37.5639	3.20466e+06	3.67608e+06	8.03902e+06	4.97325e+06	2.66548e+06	53.5962	5.19569e+06	5.24508e+06	5.55874e+06	5.33317e+06	196908	3.69213
P50502	Hsc70-interacting protein OS=Homo sapiens GN=ST13 PE=1 SV=2 - [F10A1_HUMAN]	LQKPNAAIRDCDR	[11] DesthioBiotinIAM(new)	-0.207035	0.0565338	-0.201523	449.747	39.078	1794.96	4	4.67209	1.19926e+06	1.25039e+06	1.32372e+06	1.32881e+06	1.4517e+06	1.45785e+06	1.33529e+06	104364	7.81584	1.02927e+06	1.18935e+06	1.25172e+06	1.15678e+06	114745	9.9193	1.27088e+06	1.28001e+06	1.61507e+06	1.38865e+06	196136	14.1242	907889	1.23448e+06	1.34126e+06	1.16121e+06	225785	19.4439
Q9NZT2	Opioid growth factor receptor OS=Homo sapiens GN=OGFR PE=1 SV=3 - [OGFR_HUMAN]	TGTQEVGGQDPGEAVQPCR	[18] DesthioBiotinIAM(new)	-0.183419	-0.046587	-0.201405	742.362	48.165	2224.06	3	4.75246	1.13876e+06	1.16112e+06	1.18282e+06	1.19179e+06	1.25593e+06	1.31686e+06	1.20788e+06	66387.6	5.4962	1.0489e+06	1.05956e+06	1.08257e+06	1.06368e+06	17207.6	1.61775	1.00868e+06	1.24906e+06	1.25076e+06	1.1695e+06	139272	11.9087	982219	1.06993e+06	1.09935e+06	1.0505e+06	60933.2	5.80042
Q8N3R9	MAGUK p55 subfamily member 5 OS=Homo sapiens GN=MPP5 PE=1 SV=3 - [MPP5_HUMAN]	KRPIILIGPQNCGQNELR	[12] DesthioBiotinIAM(new)	-0.195463	-0.0372224	-0.201201	587.09	50.7408	2344.33	4	5.83374	161640	162310	167174	175074	179155	183127	171413	9021.07	5.26276	143339	150958	154784	149694	5826.51	3.89228	149056	150533	201553	167047	29891.4	17.894	147365	149890	150045	149100	1504.34	1.00895
Q8TE77	Protein phosphatase Slingshot homolog 3 OS=Homo sapiens GN=SSH3 PE=1 SV=2 - [SSH3_HUMAN]	TQAFQEQEQGQGQGQGEPCISSTPR	[19] DesthioBiotinIAM(new)	-0.257961	-0.0883054	-0.200546	996.475	50.9427	2986.4	3	6.13344	759362	941697	942144	1.02101e+06	1.11577e+06	1.14527e+06	987542	140477	14.2249	803241	805470	868841	825850	37247.5	4.5102	705102	817909	1.26371e+06	928908	295385	31.7992	782832	823596	971711	859380	99394.2	11.5658
Q9H0W9	Ester hydrolase C11orf54 OS=Homo sapiens GN=C11orf54 PE=1 SV=1 - [CK054_HUMAN]	SHIMPAEFSSCPLNSDEEVNK	[4] Oxidation|[11] DesthioBiotinIAM(new)	-0.0639494	-0.064732	-0.199975	882.747	52.8852	2645.22	3	3.57378	488711	509288	791653	804605	904959	927919	737856	192724	26.1195	645522	706172	765896	705864	60187.4	8.52677	450223	525184	1.14104e+06	705481	379059	53.7306	451272	543171	932612	642352	255538	39.7816
Q9UBL3	Set1/Ash2 histone methyltransferase complex subunit ASH2 OS=Homo sapiens GN=ASH2L PE=1 SV=1 - [ASH2L_HUMAN]	SCTVSINFGPCFK	[2] Carbamidomethyl|[11] DesthioBiotinIAM(new)	-0.185805	-0.0151979	-0.199412	878.435	63.5792	1754.86	2	4.50219	987820	1.06736e+06	1.0885e+06	1.1141e+06	1.1405e+06	1.14358e+06	1.09031e+06	58236.3	5.34126	919767	967364	988534	958555	35219.4	3.67422	911917	1.04184e+06	1.2829e+06	1.07888e+06	188243	17.4479	863613	980849	1.00421e+06	949557	75340.9	7.93432
P46782	40S ribosomal protein S5 OS=Homo sapiens GN=RPS5 PE=1 SV=4 - [RS5_HUMAN]	AQCPIVER	[3] DesthioBiotinIAM(new)	-0.12242	-0.365751	-0.19859	606.334	46.951	1210.65	2	3.69057	1.22996e+06	1.23783e+06	1.32402e+06	1.33594e+06	1.34284e+06	1.44953e+06	1.32002e+06	80536.2	6.10113	913069	1.31101e+06	1.41381e+06	1.21263e+06	264471	21.8097	1.00836e+06	1.02686e+06	1.03805e+06	1.02442e+06	14990.6	1.46332	972398	1.23719e+06	1.24122e+06	1.15027e+06	154054	13.3929
O60739	Eukaryotic translation initiation factor 1b OS=Homo sapiens GN=EIF1B PE=1 SV=2 - [EIF1B_HUMAN]	FACNGTVIEHPEYGEVIQLQGDQR	[3] DesthioBiotinIAM(new)	-0.193579	-0.28724	-0.198434	1000.5	59.3455	2998.47	3	3.30542	1.11941e+06	1.20331e+06	1.21449e+06	1.25065e+06	1.30371e+06	1.34899e+06	1.24009e+06	80736.1	6.51049	1.05889e+06	1.06908e+06	1.12516e+06	1.08438e+06	35686.3	3.29095	960008	1.01977e+06	1.06887e+06	1.01622e+06	54516.9	5.3647	1.04153e+06	1.099e+06	1.10168e+06	1.08074e+06	33977.8	3.14395
O95994	Anterior gradient protein 2 homolog OS=Homo sapiens GN=AGR2 PE=1 SV=1 - [AGR2_HUMAN]	TSNKPLMIIHHLDECPHSQALK	[7] Oxidation|[15] DesthioBiotinIAM(new)	-0.345154	-0.454835	-0.198053	565.701	46.7451	2823.47	5	5.18716	3.43793e+07	3.44992e+07	3.55088e+07	3.80227e+07	3.87512e+07	4.18447e+07	3.71677e+07	2.92442e+06	7.86818	2.61165e+07	2.63753e+07	3.52861e+07	2.92593e+07	5.22096e+06	17.8438	2.36828e+07	2.4951e+07	3.2718e+07	2.71173e+07	4.89163e+06	18.0388	2.94739e+07	3.14376e+07	3.62885e+07	3.24e+07	3.50775e+06	10.8264
P78406	mRNA export factor OS=Homo sapiens GN=RAE1 PE=1 SV=1 - [RAE1L_HUMAN]	VFTASCDK	[6] DesthioBiotinIAM(new)	-0.136105	0.0678655	-0.197855	583.8	45.5495	1165.59	2	4.66593	409735	463683	476766	479111	523579	532473	480891	44412.7	9.23551	395580	427991	489224	437598	47555.5	10.8674	462496	511787	537876	504053	38280.4	7.59451	336901	379336	541553	419263	108010	25.7619
Q9H334	Forkhead box protein P1 OS=Homo sapiens GN=FOXP1 PE=1 SV=1 - [FOXP1_HUMAN]	EVTSAHTAEETTGNNHSSLDLTTTCVSSSAPSK	[25] DesthioBiotinIAM(new)	-0.252925	-0.00477835	-0.196995	915.438	48.3797	3657.72	4	4.02637	779386	794685	894128	965031	999235	999372	905306	99454.5	10.9857	719351	735700	824129	759727	56369.8	7.41975	770246	966925	969767	902313	114382	12.6765	757469	767081	844723	789758	47843.5	6.058
Q9BTE3	Mini-chromosome maintenance complex-binding protein OS=Homo sapiens GN=MCMBP PE=1 SV=2 - [MCMBP_HUMAN]	LQHINPLLPACLNK	[11] DesthioBiotinIAM(new)	-0.202895	-0.253044	-0.196931	624.032	57.9256	1869.07	3	4.53064	424782	427094	433758	442099	449986	465087	440468	15292.6	3.4719	355034	391468	401541	382681	24466.9	6.39357	338417	358371	412033	369607	38072.3	10.3008	355829	395297	401672	384266	24832.8	6.46241
P42765	3-ketoacyl-CoA thiolase, mitochondrial OS=Homo sapiens GN=ACAA2 PE=1 SV=2 - [THIM_HUMAN]	LCGSGFQSIVNGCQEICVK	[2] DesthioBiotinIAM(new)|[13] Carbamidomethyl|[17] Carbamidomethyl	-0.0155169	-0.461161	-0.196596	799.062	61.9183	2394.16	3	5.60325	1.08593e+06	1.14559e+06	1.25781e+06	1.31094e+06	1.33041e+06	1.39078e+06	1.25358e+06	116452	9.28955	1.14702e+06	1.24987e+06	1.32361e+06	1.24017e+06	88693.8	7.15177	711371	806964	1.21346e+06	910600	266607	29.2782	945624	1.05793e+06	1.27808e+06	1.09388e+06	169116	15.4602
Q969E8	Pre-rRNA-processing protein TSR2 homolog OS=Homo sapiens GN=TSR2 PE=1 SV=1 - [TSR2_HUMAN]	EMASCITQR	[5] DesthioBiotinIAM(new)	-0.385079	0.151683	-0.196583	667.833	48.1964	1333.65	2	2.8757	277989	281756	293375	306100	400165	410623	328335	60583.4	18.4517	202416	274341	277497	251418	42466	16.8906	306645	355632	431929	364735	63136	17.3101	248353	280514	330662	286510	41480.5	14.4779
Q9H3P7	Golgi resident protein GCP60 OS=Homo sapiens GN=ACBD3 PE=1 SV=4 - [GCP60_HUMAN]	QVLMGPYNPDTCPEVGFFDVLGNDR	[4] Oxidation|[12] DesthioBiotinIAM(new)	-0.599603	-0.404429	-0.195449	1032.5	75.6487	3094.47	3	6.0391	1.41736e+06	1.45489e+06	1.46066e+06	1.46904e+06	1.49227e+06	1.74632e+06	1.50676e+06	119859	7.95475	951390	963460	1.06824e+06	994362	64261.8	6.46261	521488	1.00494e+06	1.88879e+06	1.13841e+06	693355	60.9057	1.13641e+06	1.13943e+06	1.67172e+06	1.31585e+06	308194	23.4216
Q9UDY2	Tight junction protein ZO-2 OS=Homo sapiens GN=TJP2 PE=1 SV=2 - [ZO2_HUMAN]	MSYLTAMGADYLSCDSR	[1] Oxidation|[7] Oxidation|[14] DesthioBiotinIAM(new)	-0.631475	-0.439161	-0.195153	737.998	59.2363	2210.97	3	3.99056	230861	231940	236088	278990	318709	319280	269311	42448.8	15.762	92343.3	126213	302979	173845	113108	65.0627	92698	204676	298529	198634	103048	51.8784	190014	238022	277678	235238	43898.1	18.6611
A6NNZ2	Tubulin beta-8 chain-like protein LOC260334 OS=Homo sapiens PE=1 SV=1 - [TBB8L_HUMAN]	TAVCDIPPRGLK	[4] DesthioBiotinIAM(new)	0.0341383	-0.145749	-0.194475	522.635	48.8608	1564.88	3	4.76569	312091	317356	335860	342827	369301	382974	343402	28116.5	8.18765	276205	379688	398980	351624	66023.8	18.7768	297051	315084	319077	310404	11735.2	3.78061	252975	310061	337250	300095	43012.3	14.3329
Q13242	Serine/arginine-rich splicing factor 9 OS=Homo sapiens GN=SRSF9 PE=1 SV=1 - [SRSF9_HUMAN]	NGYDYGQCR	[8] DesthioBiotinIAM(new)	-0.214553	-0.0499511	-0.194363	686.312	45.5853	1370.61	2	3.97056	702055	723381	733942	751456	767045	816433	749052	39914.3	5.32864	595202	663079	678347	645543	44259.9	6.85623	645901	741455	783327	723561	70438.7	9.73501	634244	642701	686976	654640	28320.6	4.32613
Q32MZ4	Leucine-rich repeat flightless-interacting protein 1 OS=Homo sapiens GN=LRRFIP1 PE=1 SV=2 - [LRRF1_HUMAN]	CEMSEHPSQTVR	[1] DesthioBiotinIAM(new)	0.23001	0.371547	-0.194235	567.27	40.3439	1698.79	3	4.11723	488357	499820	549469	549714	639943	668098	565900	73264.1	12.9465	551592	700710	738834	663712	98952.2	14.9089	618259	678919	899204	732128	147837	20.1928	434313	464659	584880	494617	79628.6	16.099
Q8TAT6	Nuclear protein localization protein 4 homolog OS=Homo sapiens GN=NPLOC4 PE=1 SV=3 - [NPL4_HUMAN]	FVALENISCK	[9] DesthioBiotinIAM(new)	-0.189924	-0.246639	-0.194175	710.387	58.1073	1418.76	2	0.529648	142650	143896	152595	153856	174577	187761	159223	18069.1	11.3483	122572	132023	164154	139583	21797.7	15.6163	131799	133522	137285	134202	2805.46	2.09047	111946	139178	166392	139172	27223.2	19.5608
Q9ULW0	Targeting protein for Xklp2 OS=Homo sapiens GN=TPX2 PE=1 SV=2 - [TPX2_HUMAN]	NVTQIEPFCLETDRR	[9] DesthioBiotinIAM(new)	-0.231597	-0.21873	-0.194156	706.368	58.4485	2116.08	3	3.70407	390575	396527	402094	410069	416979	444248	410082	19198.8	4.68169	325762	335801	386229	349264	32403.7	9.27773	318439	332735	406003	352392	46975.4	13.3304	336841	356731	381767	358446	22512	6.28045
P60981	Destrin OS=Homo sapiens GN=DSTN PE=1 SV=3 - [DEST_HUMAN]	FQGIKHECQANGPEDLNR	[8] DesthioBiotinIAM(new)	-0.204979	-0.0933702	-0.194079	588.796	43.0453	2351.15	4	3.98712	3.35402e+06	3.42708e+06	3.52243e+06	3.61254e+06	3.6358e+06	3.73543e+06	3.54788e+06	141357	3.98427	2.89287e+06	2.93648e+06	3.40457e+06	3.07797e+06	283685	9.21661	3.08076e+06	3.08355e+06	3.8123e+06	3.32554e+06	421553	12.6762	2.88336e+06	3.07682e+06	3.34376e+06	3.10131e+06	231171	7.45397
Q99497	Protein DJ-1 OS=Homo sapiens GN=PARK7 PE=1 SV=2 - [PARK7_HUMAN]	KGLIAAICAGPTALLAHEIGFGSK	[8] DesthioBiotinIAM(new)	0.255093	-0.200319	-0.193952	659.38	68.3094	2633.49	4	7.35507	7.43705e+07	8.13795e+07	8.5035e+07	8.56239e+07	9.16893e+07	9.31234e+07	8.52036e+07	6.88436e+06	8.07989	9.20405e+07	1.06076e+08	1.06933e+08	1.01683e+08	8.36171e+06	8.22331	7.28974e+07	7.46672e+07	7.49084e+07	7.41577e+07	1.09806e+06	1.48071	7.07776e+07	7.46843e+07	7.79951e+07	7.44857e+07	3.61288e+06	4.85043
P61978	Heterogeneous nuclear ribonucleoprotein K OS=Homo sapiens GN=HNRNPK PE=1 SV=1 - [HNRPK_HUMAN]	LFQECCPHSTDRVVLIGGKPDR	[5] DesthioBiotinIAM(new)|[6] Carbamidomethyl	-0.0511832	0.0482765	-0.193763	565.497	49.6492	2822.45	5	5.39139	5.54132e+06	5.65649e+06	5.8702e+06	5.9015e+06	5.91727e+06	6.0597e+06	5.82441e+06	189926	3.26086	5.30703e+06	5.57121e+06	5.98596e+06	5.6214e+06	342238	6.08813	5.68151e+06	6.01066e+06	6.37566e+06	6.02261e+06	347226	5.76537	4.93452e+06	4.944e+06	5.39872e+06	5.09241e+06	265310	5.20991
O60437	Periplakin OS=Homo sapiens GN=PPL PE=1 SV=4 - [PEPL_HUMAN]	GQELAAMACELQAQK	[7] Oxidation|[9] DesthioBiotinIAM(new)	-0.422662	-0.403075	-0.193733	634.991	51.4087	1901.95	3	8.70409	1.70209e+06	1.76782e+06	1.76799e+06	1.86529e+06	1.95514e+06	2.03738e+06	1.84929e+06	127869	6.91451	1.31783e+06	1.40669e+06	1.41444e+06	1.37965e+06	53681.8	3.89096	1.15859e+06	1.1626e+06	1.87435e+06	1.39851e+06	412093	29.4665	1.51981e+06	1.62995e+06	1.70094e+06	1.6169e+06	91268.1	5.64462
P49321	Nuclear autoantigenic sperm protein OS=Homo sapiens GN=NASP PE=1 SV=2 - [NASP_HUMAN]	KPTDGASSSNCVTDISHLVR	[11] DesthioBiotinIAM(new)	0.104302	0.209427	-0.19372	596.56	52.7966	2382.21	4	5.79111	6.79997e+06	6.81827e+06	7.19496e+06	8.09603e+06	9.05049e+06	9.31577e+06	7.87925e+06	1.11724e+06	14.1796	7.98218e+06	8.42875e+06	8.99903e+06	8.46999e+06	509673	6.0174	6.67328e+06	1.00492e+07	1.06081e+07	9.11021e+06	2.12887e+06	23.3679	6.38248e+06	6.65693e+06	7.62821e+06	6.88921e+06	654538	9.50092
O00299	Chloride intracellular channel protein 1 OS=Homo sapiens GN=CLIC1 PE=1 SV=4 - [CLIC1_HUMAN]	KFLDGNELTLADCNLLPK	[13] DesthioBiotinIAM(new)	-0.290153	-0.261721	-0.193144	767.419	65.9656	2299.24	3	5.01273	2.14612e+06	2.15335e+06	2.22674e+06	2.28314e+06	2.40933e+06	2.44104e+06	2.27662e+06	126018	5.53531	1.62337e+06	1.85515e+06	2.10704e+06	1.86185e+06	241902	12.9925	1.88605e+06	1.8993e+06	1.91139e+06	1.89891e+06	12672.5	0.667355	1.8575e+06	1.87427e+06	2.2423e+06	1.99135e+06	217483	10.9214
Q9NUP1	Biogenesis of lysosome-related organelles complex 1 subunit 4 OS=Homo sapiens GN=BLOC1S4 PE=1 SV=1 - [BL1S4_HUMAN]	TEDYFPCCSERPQL	[7] DesthioBiotinIAM(new)|[8] Carbamidomethyl	-0.339957	-0.14046	-0.192794	680.981	60.21	2039.92	3	5.74306	164806	171193	172113	186253	186528	187720	178102	9902.78	5.56017	127739	143664	150733	140712	11777.8	8.37013	135410	156832	192496	161579	28837.9	17.8475	140244	152053	175173	155823	17767.3	11.4022
P62873	Guanine nucleotide-binding protein G(I)/G(S)/G(T) subunit beta-1 OS=Homo sapiens GN=GNB1 PE=1 SV=3 - [GBB1_HUMAN]	KACADATLSQITNNIDPVGR	[3] DesthioBiotinIAM(new)	-0.124391	-0.198732	-0.192097	795.087	59.2519	2382.24	3	2.90457	2.36393e+06	2.53261e+06	2.74027e+06	2.78262e+06	2.80623e+06	2.86574e+06	2.6819e+06	192976	7.19551	2.26689e+06	2.49105e+06	2.62312e+06	2.46035e+06	180085	7.31948	2.20517e+06	2.36407e+06	2.44111e+06	2.33678e+06	120317	5.14882	2.2699e+06	2.38075e+06	2.39202e+06	2.34756e+06	67491	2.87495
Q9UFW8	CGG triplet repeat-binding protein 1 OS=Homo sapiens GN=CGGBP1 PE=1 SV=2 - [CGBP1_HUMAN]	QRPLTASLQCNSTAQTEK	[10] DesthioBiotinIAM(new)	-0.257157	0.0424758	-0.192078	758.065	45.7426	2271.17	3	4.29383	708335	730237	752907	767966	775593	791231	754378	30652.2	4.06324	576248	626260	691136	631215	57604.2	9.12592	750870	782488	797398	776919	23758.6	3.05805	593220	668295	719506	660340	63518	9.61898
Q99497	Protein DJ-1 OS=Homo sapiens GN=PARK7 PE=1 SV=2 - [PARK7_HUMAN]	GLIAAICAGPTALLAHEIGFGSK	[7] DesthioBiotinIAM(new)	0.137753	0.0448769	-0.191902	836.136	73.7061	2505.39	3	2.93307	9.64929e+07	9.66061e+07	1.08362e+08	1.11237e+08	1.24775e+08	1.41678e+08	1.13192e+08	1.7474e+07	15.4376	9.20633e+07	1.38599e+08	1.42935e+08	1.24533e+08	2.82026e+07	22.6468	1.15612e+08	1.17315e+08	1.17378e+08	1.16768e+08	1.00156e+06	0.857735	9.66392e+07	9.74564e+07	1.03186e+08	9.90939e+07	3.56729e+06	3.59991
P51858	Hepatoma-derived growth factor OS=Homo sapiens GN=HDGF PE=1 SV=1 - [HDGF_HUMAN]	SCVEEPEPEPEAAEGDGDK	[2] DesthioBiotinIAM(new)	-0.100048	-0.175108	-0.191883	762.006	49.1479	2283	3	4.99471	429254	430431	463238	475516	476261	480962	459277	23543.9	5.12629	341048	467454	477016	428506	75891.9	17.7108	386859	409085	424403	406782	18877.7	4.64073	350720	424389	431130	402080	44606.4	11.0939
Q8TEX9	Importin-4 OS=Homo sapiens GN=IPO4 PE=1 SV=2 - [IPO4_HUMAN]	AAHEALGQFCCALHK	[10] Carbamidomethyl|[11] DesthioBiotinIAM(new)	-0.113594	0.143099	-0.191706	488.748	48.3673	1950.96	4	4.19376	125398	133159	135687	137023	140111	144545	135987	6504.31	4.78303	120980	126080	130011	125691	4528.06	3.60255	121822	162523	166156	150167	24614.8	16.3916	114335	116299	126564	119066	6567.38	5.51574
A0AVT1	Ubiquitin-like modifier-activating enzyme 6 OS=Homo sapiens GN=UBA6 PE=1 SV=1 - [UBA6_HUMAN]	ALQLLHCFPLDIR	[7] DesthioBiotinIAM(new)	0.0482807	-0.157849	-0.191344	612.353	67.554	1834.04	3	5.26776	669240	670923	676837	724785	758114	814932	719138	58875.1	8.18689	638098	740762	851977	743612	106968	14.3849	636147	642269	655405	644607	9839.3	1.5264	623062	623229	643150	629814	11550.1	1.83389
Q32MZ4	Leucine-rich repeat flightless-interacting protein 1 OS=Homo sapiens GN=LRRFIP1 PE=1 SV=2 - [LRRF1_HUMAN]	CTLPEHESPSQDISDACEAESTER	[1] DesthioBiotinIAM(new)|[17] Carbamidomethyl	-0.109059	-0.189833	-0.191244	996.442	50.4733	2986.3	3	4.27933	1.12861e+06	1.13715e+06	1.22956e+06	1.33855e+06	1.55936e+06	1.67502e+06	1.34471e+06	227272	16.9012	1.07181e+06	1.23502e+06	1.43359e+06	1.2468e+06	181177	14.5313	1.16075e+06	1.16899e+06	1.20701e+06	1.17892e+06	24676.4	2.09314	1.13099e+06	1.18937e+06	1.21293e+06	1.17776e+06	42181.9	3.58153
Q9UMY4	Sorting nexin-12 OS=Homo sapiens GN=SNX12 PE=1 SV=3 - [SNX12_HUMAN]	CLHMFLQEEAIDR	[1] DesthioBiotinIAM(new)|[4] Oxidation	-0.287997	-0.284512	-0.19122	639.652	54.5367	1915.93	3	3.38378	155824	155962	159463	174951	207318	231703	180870	31700.4	17.5266	120534	137113	186772	148140	34468.5	23.2675	100683	134962	209850	148498	55828	37.5951	141159	160870	173224	158418	16172.7	10.2089
Q8IWX8	Calcium homeostasis endoplasmic reticulum protein OS=Homo sapiens GN=CHERP PE=1 SV=3 - [CHERP_HUMAN]	SPPHCELMAGHLR	[5] DesthioBiotinIAM(new)|[8] Oxidation	-0.263466	0.0224383	-0.190999	440.726	41.6728	1758.87	4	5.0113	200046	206334	272945	287131	298421	306410	261881	46876.4	17.8999	198365	216601	239541	218169	20632.6	9.45718	243864	258230	295864	265986	26853.7	10.0959	198649	205661	283913	229407	47332.9	20.6327
Q8IZ69	tRNA (uracil-5-)-methyltransferase homolog A OS=Homo sapiens GN=TRMT2A PE=1 SV=2 - [TRM2A_HUMAN]	ACCPLEGVRPSPQQTEYR	[2] Carbamidomethyl|[3] DesthioBiotinIAM(new)	-0.115702	-0.253348	-0.190414	796.393	50.6099	2386.16	3	1.63579	676767	697570	715289	738916	751709	790989	728540	40889.2	5.61248	653981	668294	694906	672394	20768.2	3.08869	526222	631691	675708	611207	76819.5	12.5685	591025	657853	666499	638459	41305.7	6.46959
Q9NYL9	Tropomodulin-3 OS=Homo sapiens GN=TMOD3 PE=1 SV=1 - [TMOD3_HUMAN]	FCNIMGSSNGVDQEHFSNVVKGEK	[2] DesthioBiotinIAM(new)|[5] Oxidation	-0.275239	-0.368212	-0.19039	735.354	50.1101	2937.39	4	4.01895	4.40187e+06	4.51257e+06	5.06747e+06	5.82941e+06	5.99041e+06	7.06834e+06	5.47835e+06	1.01724e+06	18.5684	4.32849e+06	4.45024e+06	4.80177e+06	4.52683e+06	245761	5.42898	3.21434e+06	3.31315e+06	6.20543e+06	4.24431e+06	1.6991e+06	40.0325	4.28683e+06	4.7813e+06	5.33503e+06	4.80105e+06	524381	10.9222
Q12872	Splicing factor, suppressor of white-apricot homolog OS=Homo sapiens GN=SFSWAP PE=1 SV=3 - [SFSWA_HUMAN]	CNRLEELMKPLK	[1] DesthioBiotinIAM(new)	-0.3436	-0.172226	-0.1903	590.667	52.744	1768.98	3	5.593	19297.4	21150.2	28426.9	62940.4	70087	70668.7	45428.4	24952.3	54.9267	17884.3	19612.2	69906.2	35800.9	29548.7	82.5362	19119.5	25715.9	76114	40316.5	31176.5	77.3295	20626.5	20874.4	77942.7	39814.5	33020.2	82.935
P45880	Voltage-dependent anion-selective channel protein 2 OS=Homo sapiens GN=VDAC2 PE=1 SV=2 - [VDAC2_HUMAN]	YKWCEYGLTFTEK	[4] DesthioBiotinIAM(new)	-0.324807	0.131201	-0.190266	982.488	59.9702	1962.96	2	3.63418	60839.8	68245.1	90714.7	110772	169202	171889	111944	48672.8	43.4797	46875.5	67351.8	153902	89376.5	56811	63.5637	78038.9	100817	188949	122601	58576.4	47.7779	86062.2	103156	105119	98112.5	10481.9	10.6836
Q9NZ09	Ubiquitin-associated protein 1 OS=Homo sapiens GN=UBAP1 PE=1 SV=1 - [UBAP1_HUMAN]	GFDPLLVEEALEMHQCSEEK	[13] Oxidation|[16] DesthioBiotinIAM(new)	-0.392338	-0.336121	-0.190097	872.75	67.3321	2615.23	3	1.81334	478913	497003	604876	715913	759645	821972	646387	141829	21.9419	354673	522275	600486	492478	125586	25.5008	199913	409440	926789	512047	374144	73.0682	521963	568477	609326	566589	43712.1	7.71497
Q9BXF6	Rab11 family-interacting protein 5 OS=Homo sapiens GN=RAB11FIP5 PE=1 SV=1 - [RFIP5_HUMAN]	SSLCVNGSHIYNEEPQGPVR	[4] DesthioBiotinIAM(new)	-0.131397	0.0268929	-0.190086	828.081	51.0539	2481.22	3	5.45226	203147	204129	204976	222105	222804	226873	214006	11005.2	5.14248	180769	184778	220580	195376	21919.2	11.219	184471	200027	269599	218032	45330.4	20.7907	177779	186573	198410	187587	10353	5.51901
O60437	Periplakin OS=Homo sapiens GN=PPL PE=1 SV=4 - [PEPL_HUMAN]	ETPLKPIPVEALCDFEGEQGLISR	[13] DesthioBiotinIAM(new)	-0.244728	-0.1915	-0.18984	979.857	69.5684	2936.55	3	6.10757	1.24997e+06	1.25175e+06	1.26833e+06	1.49258e+06	1.54555e+06	1.63906e+06	1.40787e+06	172254	12.2351	1.05077e+06	1.16896e+06	1.3449e+06	1.18821e+06	148005	12.4562	1.08636e+06	1.2084e+06	1.40384e+06	1.23287e+06	160145	12.9897	1.13577e+06	1.23867e+06	1.32842e+06	1.23429e+06	96403	7.81043
P31947	14-3-3 protein sigma OS=Homo sapiens GN=SFN PE=1 SV=1 - [1433S_HUMAN]	GAVEKGEELSCEER	[11] DesthioBiotinIAM(new)	-0.356791	-0.106424	-0.189394	611.302	42.7668	1830.89	3	3.9698	6.90116e+07	7.14347e+07	7.79664e+07	8.14444e+07	8.60802e+07	8.78685e+07	7.89676e+07	7.65272e+06	9.69096	5.84183e+07	5.91913e+07	6.73878e+07	6.16658e+07	4.97046e+06	8.06032	6.84482e+07	7.22034e+07	7.94046e+07	7.33521e+07	5.56781e+06	7.59053	5.42609e+07	6.81155e+07	8.53814e+07	6.92526e+07	1.55914e+07	22.5138
Q71RC2	La-related protein 4 OS=Homo sapiens GN=LARP4 PE=1 SV=3 - [LARP4_HUMAN]	KLSYAEVCQKPPKEPSSVLVQPLR	[8] DesthioBiotinIAM(new)	-0.0930218	-0.1209	-0.189151	748.926	51.5999	2991.67	4	5.51187	123142	132965	149846	159291	162161	170445	149642	18237.3	12.1873	118859	146140	155896	140298	19197	13.683	116715	135220	160904	137613	22191.2	16.1258	100903	127317	165543	131254	32499.3	24.7605
Q6X2U4	Non-structural polyprotein p200 OS=Rubella virus (strain BRD1) PE=3 SV=1 - [POLN_RUBVB]	WIASHADASLDGTGDPLDPLMETVGCACSR	[21] Oxidation|[28] DesthioBiotinIAM(new)	-0.32521	-0.443652	-0.189122	680.921	44.0506	3399.57	5	5.16057	3.75435e+07	4.51333e+07	4.64983e+07	4.81258e+07	4.96734e+07	5.51796e+07	4.70256e+07	5.8048e+06	12.3439	2.68221e+07	3.51517e+07	5.06314e+07	3.7535e+07	1.20823e+07	32.1893	3.18489e+07	3.44869e+07	3.7394e+07	3.45766e+07	2.77365e+06	8.02175	3.9114e+07	3.94252e+07	4.52049e+07	4.1248e+07	3.43031e+06	8.3163
O00299	Chloride intracellular channel protein 1 OS=Homo sapiens GN=CLIC1 PE=1 SV=4 - [CLIC1_HUMAN]	IGNCPFSQR	[4] DesthioBiotinIAM(new)	-0.075487	-0.200878	-0.18908	659.343	50.6099	1316.67	2	4.65037	1.05343e+08	1.07965e+08	1.17468e+08	1.21153e+08	1.2177e+08	1.23647e+08	1.16224e+08	7.72414e+06	6.64588	1.05309e+08	1.07651e+08	1.17938e+08	1.10299e+08	6.71831e+06	6.09097	9.61921e+07	1.02122e+08	1.05039e+08	1.01118e+08	4.50819e+06	4.45836	9.57629e+07	1.01183e+08	1.08898e+08	1.01948e+08	6.60107e+06	6.47494
Q9NQS7	Inner centromere protein OS=Homo sapiens GN=INCENP PE=1 SV=3 - [INCE_HUMAN]	KPEDNHTQCQLVPVVEIGISER	[9] DesthioBiotinIAM(new)	-0.31358	-0.236536	-0.188841	697.619	59.3649	2786.45	4	3.70279	453064	474907	476796	480763	507667	519411	485435	24098.9	4.96441	361715	384685	425404	390602	32253.8	8.25747	390504	408921	436658	412028	23232.9	5.63867	389095	425240	463295	425877	37103.9	8.71235
Q6ZUT6	Uncharacterized protein C15orf52 OS=Homo sapiens GN=C15orf52 PE=1 SV=1 - [CO052_HUMAN]	STLQDCSQLRGEGPAR	[6] DesthioBiotinIAM(new)	-0.123268	-0.160005	-0.188718	672.011	45.6603	2013.01	3	3.04729	107152	119000	121948	128556	128749	153218	126437	15326.1	12.1215	105560	120727	121961	116083	9133.91	7.86846	112110	113354	114028	113164	972.609	0.859469	97196.9	107299	128306	110934	15869.8	14.3057
O75150	E3 ubiquitin-protein ligase BRE1B OS=Homo sapiens GN=RNF40 PE=1 SV=4 - [BRE1B_HUMAN]	LREIQPCLAESR	[7] DesthioBiotinIAM(new)	-0.048678	-0.0724926	-0.188717	570.985	48.9436	1709.93	3	4.70771	654678	677447	701277	717876	732877	734834	703165	31994.2	4.55003	646985	665948	726572	679835	41571.2	6.1149	594925	668864	742326	668705	73700.5	11.0214	596433	619172	635236	616947	19497.1	3.16026
P0CB43	Protein FAM203B OS=Homo sapiens GN=FAM203B PE=1 SV=1 - [F203B_HUMAN]	EPAPCAALMAALAAAEPADSGLER	[5] DesthioBiotinIAM(new)|[9] Oxidation	-0.719743	-0.458569	-0.188002	879.774	73.496	2636.3	3	2.35428	550771	555723	627937	654094	670800	705253	627429	62717.1	9.99588	378300	380745	383890	380979	2802.4	0.735579	264809	366521	738426	456585	249323	54.6061	470875	570169	611267	550771	72178.1	13.1049
Q15370	Transcription elongation factor B polypeptide 2 OS=Homo sapiens GN=TCEB2 PE=1 SV=1 - [ELOB_HUMAN]	LYKDDQLLDDGKTLGECGFTSQTARPQAPATVGLAFR	[17] DesthioBiotinIAM(new)	-0.116835	-0.640756	-0.187964	856.647	61.2391	4278.2	5	5.45873	1.25644e+06	1.2732e+06	1.33031e+06	1.36931e+06	1.40045e+06	1.46257e+06	1.34871e+06	78257.6	5.80239	1.01244e+06	1.3043e+06	1.41465e+06	1.2438e+06	207819	16.7084	793292	885208	916603	865034	64082.9	7.40813	882399	1.31223e+06	1.35726e+06	1.18396e+06	262129	22.14
P49327	Fatty acid synthase OS=Homo sapiens GN=FASN PE=1 SV=3 - [FAS_HUMAN]	KLQELSSKADEASELACPTPK	[17] DesthioBiotinIAM(new)	-0.166489	-0.241835	-0.187737	636.089	49.0879	2540.33	4	4.37158	768091	772101	822632	827239	866503	892699	824877	49705.5	6.0258	703686	714759	786473	734973	44942.6	6.11487	630746	697051	764923	697573	67090.2	9.61766	709952	730315	732415	724227	12407	1.71314
Q15233	Non-POU domain-containing octamer-binding protein OS=Homo sapiens GN=NONO PE=1 SV=4 - [NONO_HUMAN]	CSEGSFLLTTFPRPVTVEPMDQLDDEEGLPEK	[1] DesthioBiotinIAM(new)|[20] Oxidation	-0.0678124	0.1988	-0.187424	1297.97	68.9704	3890.88	3	5.69567	1.15087e+06	1.15365e+06	1.1665e+06	1.23662e+06	1.49551e+06	1.54559e+06	1.29146e+06	180888	14.0065	1.09877e+06	1.25281e+06	1.34489e+06	1.23216e+06	124353	10.0923	886425	1.75513e+06	1.80523e+06	1.48226e+06	516617	34.8533	871189	1.12546e+06	1.40571e+06	1.13412e+06	267367	23.5748
Q9UKV3	Apoptotic chromatin condensation inducer in the nucleus OS=Homo sapiens GN=ACIN1 PE=1 SV=2 - [ACINU_HUMAN]	KCEAEEAEPPAATQPQTSETQTSHLPESER	[2] DesthioBiotinIAM(new)	-0.242588	-0.109291	-0.187349	895.176	44.3405	3576.68	4	3.2614	4.61164e+06	4.70694e+06	4.95878e+06	5.15849e+06	5.55453e+06	5.75243e+06	5.1238e+06	457211	8.92329	3.83132e+06	4.52401e+06	4.637e+06	4.33078e+06	436217	10.0725	4.30241e+06	4.7496e+06	5.19796e+06	4.74999e+06	447776	9.42689	4.34677e+06	4.5759e+06	4.57678e+06	4.49982e+06	132543	2.94552
Q92905	COP9 signalosome complex subunit 5 OS=Homo sapiens GN=COPS5 PE=1 SV=4 - [CSN5_HUMAN]	IEDFGVHCK	[8] DesthioBiotinIAM(new)	-0.404551	-0.356198	-0.187013	448.566	48.07	1342.68	3	4.8337	67848.3	70829.4	72029.5	76345.2	77446.7	80370.7	74145	4682.26	6.31501	51276	54850.9	61916.3	56014.4	5414.72	9.66665	56621	56881.4	60268.3	57923.6	2034.76	3.51284	63455.5	64492.4	67443.9	65130.6	2069.38	3.17728
Q7RTV0	PHD finger-like domain-containing protein 5A OS=Homo sapiens GN=PHF5A PE=1 SV=1 - [PHF5A_HUMAN]	ICDECNYGSYQGR	[2] Carbamidomethyl|[5] DesthioBiotinIAM(new)	-0.0397527	-0.048077	-0.186836	930.906	48.7156	1859.8	2	2.58428	889557	894037	910114	926517	928478	943118	915303	21047.7	2.29954	787721	905189	978370	890427	96177.9	10.8013	822485	894484	938943	885304	58769	6.63828	675232	833704	903430	804122	116940	14.5426
Q96E39	RNA binding motif protein, X-linked-like-1 OS=Homo sapiens GN=RBMXL1 PE=1 SV=1 - [RMXL1_HUMAN]	SDLYSSCDR	[7] DesthioBiotinIAM(new)	-0.12982	0.0813261	-0.186724	671.312	47.194	1340.61	2	4.22893	753078	755291	773260	799183	815125	818795	785788	29279.8	3.72617	674206	706262	774035	718168	50968.3	7.097	676138	907500	910431	831356	134431	16.17	607089	729599	734491	690393	72185	10.4556
O75569	Interferon-inducible double-stranded RNA-dependent protein kinase activator A OS=Homo sapiens GN=PRKRA PE=1 SV=1 - [PRKRA_HUMAN]	ANASICFAVPDPLMPDPSKQPK	[6] DesthioBiotinIAM(new)|[14] Oxidation	-0.424494	-0.268967	-0.186403	880.119	63.8656	2637.34	3	2.48583	574296	669209	670968	1.2094e+06	1.32855e+06	1.43716e+06	981596	384649	39.1861	604820	678188	911154	731387	159946	21.8689	355915	461918	1.62609e+06	814640	704729	86.508	627659	651158	1.30904e+06	862620	386793	44.8393
O96028	Histone-lysine N-methyltransferase NSD2 OS=Homo sapiens GN=WHSC1 PE=1 SV=1 - [NSD2_HUMAN]	LCSSAETLESHPDIGK	[2] DesthioBiotinIAM(new)	-0.41652	-0.346636	-0.186062	661.67	48.7871	1981.99	3	5.67922	257782	262665	279667	343892	347838	364348	309365	47789.4	15.4475	203815	242985	248557	231786	24383.2	10.5197	199923	226226	303721	243290	53961.9	22.1801	255505	270839	289454	271933	17000.8	6.25184
A5YM69	Rho guanine nucleotide exchange factor 35 OS=Homo sapiens GN=ARHGEF35 PE=1 SV=1 - [ARG35_HUMAN]	CSHQPISLLGSFLTEESPDKEK	[1] DesthioBiotinIAM(new)	-0.138597	0.0511222	-0.185855	686.105	63.392	2740.39	4	6.01903	413774	455819	469953	480635	496328	522616	473187	37084.4	7.83716	412439	417896	459199	429845	25567.4	5.94806	464120	480684	525963	490256	32012.9	6.52985	405758	411708	430511	415992	12920.8	3.10602
Q8TDW5	Synaptotagmin-like protein 5 OS=Homo sapiens GN=SYTL5 PE=1 SV=1 - [SYTL5_HUMAN]	VSGEILLHISYCYK	[12] DesthioBiotinIAM(new)	-0.159265	-0.257291	-0.184471	641.016	61.3225	1920.03	3	4.19731	109836	113100	113274	114954	121892	134005	117844	8870.51	7.52736	104064	104888	107628	105527	1865.64	1.76794	94445.7	99113.1	102225	98594.7	3915.6	3.97141	83670.9	107557	119869	103699	18405	17.7485
Q02833	Ras association domain-containing protein 7 OS=Homo sapiens GN=RASSF7 PE=1 SV=1 - [RASF7_HUMAN]	KTLTPEPAPSLSRPGPAAPVTPTPGCCTDLR	[26] DesthioBiotinIAM(new)|[27] Carbamidomethyl	-0.162413	-0.00397364	-0.183731	871.71	52.5327	3482.81	4	2.35436	330841	334884	363305	366482	374987	391357	360309	23414.8	6.49852	276789	291597	397455	321947	65809.6	20.4411	331869	358205	387881	359318	28022.7	7.79886	292062	323755	335857	317225	22615.9	7.1293
P29590	Protein PML OS=Homo sapiens GN=PML PE=1 SV=3 - [PML_HUMAN]	CYASDQEVLDMHGFLR	[1] DesthioBiotinIAM(new)|[11] Oxidation	-0.313421	-0.401119	-0.183243	732.682	57.4226	2195.02	3	4.70582	1.38051e+06	1.53551e+06	1.73273e+06	2.15439e+06	2.2057e+06	2.30852e+06	1.88623e+06	388490	20.5961	1.09061e+06	1.34117e+06	2.12194e+06	1.5179e+06	537903	35.4372	997363	1.00752e+06	2.28026e+06	1.42838e+06	737768	51.6505	1.39016e+06	1.55458e+06	2.03898e+06	1.66124e+06	337301	20.3042
P04075	Fructose-bisphosphate aldolase A OS=Homo sapiens GN=ALDOA PE=1 SV=2 - [ALDOA_HUMAN]	RALANSLACQGK	[9] DesthioBiotinIAM(new)	-0.315144	-0.27884	-0.183122	509.954	42.679	1526.84	3	4.01144	306827	332027	384500	387595	399600	427303	372975	44853.8	12.0259	261525	296486	341349	299787	40014.1	13.3475	278497	318592	325191	307426	25270.2	8.21993	237816	366633	381096	328515	78879.9	24.0111
P18669	Phosphoglycerate mutase 1 OS=Homo sapiens GN=PGAM1 PE=1 SV=2 - [PGAM1_HUMAN]	YADLTEDQLPSCESLKDTIAR	[12] DesthioBiotinIAM(new)	-0.171883	-0.188749	-0.183074	888.781	60.482	2663.32	3	4.13468	1.62144e+06	1.68459e+06	1.69661e+06	1.7004e+06	1.91396e+06	1.98401e+06	1.76683e+06	145645	8.24328	1.52589e+06	1.55943e+06	1.61985e+06	1.56839e+06	47616.4	3.03601	1.48105e+06	1.48639e+06	1.68304e+06	1.55016e+06	115111	7.42577	1.51232e+06	1.54841e+06	1.60808e+06	1.55627e+06	48364.8	3.10774
Q5T3J3	Ligand-dependent nuclear receptor-interacting factor 1 OS=Homo sapiens GN=LRIF1 PE=1 SV=1 - [LRIF1_HUMAN]	ISSSVDATTVTSQQCVFR	[15] DesthioBiotinIAM(new)	-0.331074	-0.0479811	-0.182975	742.383	57.5314	2224.13	3	4.61023	148753	151046	154496	158692	162319	162758	156344	5855.97	3.74557	113321	127529	132004	124285	9755.34	7.84919	144476	148848	160366	151230	8208.69	5.42796	136458	137452	139253	137721	1416.98	1.02888
P52272	Heterogeneous nuclear ribonucleoprotein M OS=Homo sapiens GN=HNRNPM PE=1 SV=3 - [HNRPM_HUMAN]	KACQIFVR	[3] DesthioBiotinIAM(new)	-0.134575	-0.153625	-0.182529	420.915	46.9006	1259.72	3	3.58187	469722	476069	483627	484481	502381	514099	488396	16703.1	3.41999	418339	425682	490676	444899	39813.7	8.94893	417409	438807	460973	439063	21783.3	4.96131	397084	411954	482024	430354	45361.3	10.5405
Q9Y2W6	Tudor and KH domain-containing protein OS=Homo sapiens GN=TDRKH PE=1 SV=2 - [TDRKH_HUMAN]	ITCDKESEGTLLLSR	[3] DesthioBiotinIAM(new)	-0.0795613	0.0575122	-0.180645	654.353	52.6288	1960.04	3	3.63831	239475	242209	254824	259029	283872	306661	264345	26074.4	9.86376	234098	249407	266980	250162	16453.7	6.57723	231608	292527	301153	275096	37908.2	13.78	221557	238656	239489	233234	10121.3	4.33954
Q9NT62	Ubiquitin-like-conjugating enzyme ATG3 OS=Homo sapiens GN=ATG3 PE=1 SV=1 - [ATG3_HUMAN]	TVTIENHPHLPPPPMCSVHPCR	[15] Oxidation|[16] Carbamidomethyl|[21] DesthioBiotinIAM(new)	-0.465547	-0.367684	-0.180306	567.086	47.0147	2830.39	5	3.7765	722146	759894	852126	950366	954285	1.01789e+06	876119	117910	13.4583	611102	641825	650519	634482	20708.8	3.2639	489951	576774	970318	679015	255985	37.6994	728324	761062	830179	773188	51999	6.72527
P32969	60S ribosomal protein L9 OS=Homo sapiens GN=RPL9 PE=1 SV=1 - [RL9_HUMAN]	MRPGVACSVSQAQKDELILEGNDIELVSNSAALIQQATTVK	[1] Oxidation|[7] DesthioBiotinIAM(new)	-0.0496986	-0.617263	-0.180109	1160.61	71.7227	4638.41	4	2.70434	2.22596e+06	2.40156e+06	2.59133e+06	3.12039e+06	3.56329e+06	3.6421e+06	2.9241e+06	605609	20.7109	2.04213e+06	2.26877e+06	4.16437e+06	2.82509e+06	1.16538e+06	41.251	1.30556e+06	1.33383e+06	3.07933e+06	1.90624e+06	1.01602e+06	53.2998	1.45662e+06	2.66311e+06	3.62304e+06	2.58092e+06	1.08555e+06	42.0604
Q14980	Nuclear mitotic apparatus protein 1 OS=Homo sapiens GN=NUMA1 PE=1 SV=2 - [NUMA1_HUMAN]	CLEEKNEILQGK	[1] DesthioBiotinIAM(new)	-0.210024	0.0514199	-0.179967	567.308	47.3805	1698.9	3	3.6471	1.19759e+06	1.22303e+06	1.26208e+06	1.39137e+06	1.40778e+06	1.41947e+06	1.31689e+06	100377	7.6223	1.00245e+06	1.13993e+06	1.27305e+06	1.13848e+06	135308	11.885	1.30054e+06	1.3087e+06	1.48477e+06	1.36467e+06	104089	7.62741	1.14991e+06	1.15404e+06	1.1834e+06	1.16245e+06	18261.2	1.57092
P00492	Hypoxanthine-guanine phosphoribosyltransferase OS=Homo sapiens GN=HPRT1 PE=1 SV=2 - [HPRT_HUMAN]	LKSYCNDQSTGDIK	[5] DesthioBiotinIAM(new)	-0.406539	-0.0263397	-0.17992	623.312	42.419	1866.91	3	-0.637308	1.69831e+06	1.74221e+06	1.9398e+06	2.13334e+06	2.32253e+06	2.36334e+06	2.03325e+06	285756	14.0541	1.19511e+06	1.65262e+06	1.75412e+06	1.53395e+06	297798	19.4138	1.75381e+06	1.89437e+06	2.34124e+06	1.99647e+06	306737	15.364	1.77645e+06	1.783e+06	1.82512e+06	1.79486e+06	26411.9	1.47153
P35658	Nuclear pore complex protein Nup214 OS=Homo sapiens GN=NUP214 PE=1 SV=2 - [NU214_HUMAN]	ACFQVGTSEEMK	[2] DesthioBiotinIAM(new)|[11] Oxidation	-0.15281	-0.495687	-0.179682	821.387	50.5526	1640.76	2	3.71329	1.42272e+06	1.43791e+06	1.61202e+06	2.01384e+06	2.26208e+06	2.31287e+06	1.84357e+06	404888	21.9622	1.18121e+06	1.88878e+06	1.90487e+06	1.65829e+06	413237	24.9195	895017	976494	2.05101e+06	1.30751e+06	645178	49.3442	1.36858e+06	1.39276e+06	2.12172e+06	1.62769e+06	428021	26.2963
Q9HD64	X antigen family member 1 OS=Homo sapiens GN=XAGE1A PE=2 SV=3 - [XAGE1_HUMAN]	SCISQTPGINLDLGSGVK	[2] DesthioBiotinIAM(new)	-0.547098	-0.470039	-0.179632	695.708	62.6211	2084.1	3	3.44171	241603	257407	270828	297894	298579	309342	279275	26803.2	9.59741	162793	191686	218926	191135	28070.7	14.6863	186620	203449	214796	201622	14176.8	7.03137	224617	229656	285468	246580	33772	13.6961
O43242	26S proteasome non-ATPase regulatory subunit 3 OS=Homo sapiens GN=PSMD3 PE=1 SV=2 - [PSMD3_HUMAN]	ISFCLDIHNMSVK	[4] DesthioBiotinIAM(new)|[10] Oxidation	-0.28072	-0.443681	-0.179167	606.983	58.3492	1817.93	3	5.34301	139241	160180	185131	203722	228856	232018	191525	37253.5	19.451	118635	173178	181165	157659	34031	21.5852	99115.6	101963	221380	140820	69781.9	49.5541	145847	156980	204645	169157	31233.1	18.464
Q86TG7	Retrotransposon-derived protein PEG10 OS=Homo sapiens GN=PEG10 PE=1 SV=2 - [PEG10_HUMAN]	LQVSYDCR	[7] DesthioBiotinIAM(new)	-0.243382	-0.207772	-0.179006	640.33	50.3087	1278.65	2	4.69359	652647	656646	669486	695971	706712	733975	685906	31864.6	4.64563	562375	580776	595133	579428	16420.2	2.83387	518209	549544	713970	593908	105151	17.7049	575401	621071	621135	605869	26386.1	4.35509
Q14244	Ensconsin OS=Homo sapiens GN=MAP7 PE=1 SV=1 - [MAP7_HUMAN]	GALTGGTEVSALPCTTNAPGNGKPVGSPHVVTSHQSK	[14] DesthioBiotinIAM(new)	-0.12294	-0.0489976	-0.178927	771.402	47.8877	3851.97	5	3.43307	1.08602e+06	1.14554e+06	1.14863e+06	1.16469e+06	1.16606e+06	1.22747e+06	1.1564e+06	45485	3.93332	905090	1.10891e+06	1.17182e+06	1.06194e+06	139430	13.1298	1.00335e+06	1.0803e+06	1.2697e+06	1.11779e+06	137073	12.2629	992860	1.02103e+06	1.05067e+06	1.02152e+06	28906.1	2.82972
Q96QR8	Transcriptional activator protein Pur-beta OS=Homo sapiens GN=PURB PE=1 SV=3 - [PURB_HUMAN]	GGGGGPCGFQPASR	[7] DesthioBiotinIAM(new)	-0.38885	-0.405704	-0.17858	772.378	48.1484	1542.74	2	4.00868	932432	959885	964401	998440	1.05526e+06	1.06436e+06	995798	53917	5.41445	706026	733139	842421	760529	72204.8	9.49402	677060	685723	892304	751696	121847	16.2097	856233	891439	891905	879859	20462.1	2.32561
P43243	Matrin-3 OS=Homo sapiens GN=MATR3 PE=1 SV=2 - [MATR3_HUMAN]	CRDDSFFGETSHNYHKFDSEYER	[1] DesthioBiotinIAM(new)	-0.106939	-0.290071	-0.17847	633.885	49.1479	3164.39	5	5.8585	1.54757e+07	1.55188e+07	1.5694e+07	1.57694e+07	1.6499e+07	1.6885e+07	1.59737e+07	579869	3.63016	1.25817e+07	1.59572e+07	1.59585e+07	1.48324e+07	1.9492e+06	13.1415	1.26983e+07	1.28926e+07	1.36018e+07	1.30642e+07	475571	3.64025	1.38648e+07	1.41272e+07	1.43529e+07	1.4115e+07	244316	1.7309
P13639	Elongation factor 2 OS=Homo sapiens GN=EEF2 PE=1 SV=4 - [EF2_HUMAN]	YVEPIEDVPCGNIVGLVGVDQFLVK	[10] DesthioBiotinIAM(new)	-0.236477	-0.0817828	-0.178154	1000.21	79.3293	2997.6	3	5.12321	5.42895e+06	5.66313e+06	5.7533e+06	5.76222e+06	5.8729e+06	6.11932e+06	5.76664e+06	228307	3.95909	4.05249e+06	4.55802e+06	6.07393e+06	4.89481e+06	1.05197e+06	21.4915	3.99555e+06	5.2038e+06	7.14716e+06	5.44883e+06	1.59003e+06	29.1811	4.78853e+06	5.19943e+06	5.30228e+06	5.09675e+06	271831	5.33342
O00299	Chloride intracellular channel protein 1 OS=Homo sapiens GN=CLIC1 PE=1 SV=4 - [CLIC1_HUMAN]	LHIVQVVCKK	[8] DesthioBiotinIAM(new)	-0.0589103	0.0294042	-0.178144	488.304	44.9109	1461.89	3	3.53407	81964.9	84046.5	84270.9	84712.3	90845.7	99160.1	87500.1	6448.48	7.36969	75270.7	82666.5	94060.1	83999.1	9465.35	11.2684	71814.7	96805	99285.5	89301.7	15194.9	17.0153	53300.7	72449.4	106258	77336	26814.7	34.673
O94832	Unconventional myosin-Id OS=Homo sapiens GN=MYO1D PE=1 SV=2 - [MYO1D_HUMAN]	LFCWIVTR	[3] DesthioBiotinIAM(new)	-0.27865	-0.31617	-0.178	667.379	68.5521	1332.74	2	4.96975	84984	91068.2	128385	201277	208162	222102	155996	61907	39.6849	87288.4	112621	185883	128597	51202	39.8157	59620.9	102201	214067	125296	79771	63.666	46768	76050.4	290850	137890	133274	96.6531
Q15365	Poly(rC)-binding protein 1 OS=Homo sapiens GN=PCBP1 PE=1 SV=2 - [PCBP1_HUMAN]	VMTIPYQPMPASSPVICAGGQDR	[2] Oxidation|[9] Oxidation|[17] DesthioBiotinIAM(new)	-0.199156	-0.46933	-0.177681	916.12	58.8281	2745.34	3	3.7225	9.37031e+06	1.09483e+07	1.19507e+07	2.10026e+07	2.20692e+07	2.25293e+07	1.63117e+07	6.16083e+06	37.7693	8.56238e+06	1.26084e+07	2.14547e+07	1.42085e+07	6.59345e+06	46.405	5.85779e+06	6.32439e+06	2.31637e+07	1.1782e+07	9.85963e+06	83.6841	9.47127e+06	1.19829e+07	2.18105e+07	1.44216e+07	6.52108e+06	45.2175
Q9NZ09	Ubiquitin-associated protein 1 OS=Homo sapiens GN=UBAP1 PE=1 SV=1 - [UBAP1_HUMAN]	LASTFHSTSCLR	[10] DesthioBiotinIAM(new)	-0.23133	-0.156289	-0.177566	540.286	46.0844	1617.84	3	4.09843	612805	625466	652578	662929	677474	691368	653770	30133.4	4.60918	394951	634023	641767	556914	140317	25.1955	560455	577926	621562	586648	31473.3	5.36493	551953	560857	621367	578059	37769	6.53375
Q9Y6Y0	Influenza virus NS1A-binding protein OS=Homo sapiens GN=IVNS1ABP PE=1 SV=3 - [NS1BP_HUMAN]	QISSSSTGCLSSPNATVQSPK	[9] DesthioBiotinIAM(new)	-0.225988	-0.0376579	-0.177411	792.404	49.962	2374.19	3	3.83157	193125	208614	227945	240591	241388	241674	225556	20401.1	9.0448	184057	195297	199203	192852	7863.36	4.0774	195991	230974	232269	219745	20581.5	9.36612	169890	213760	214719	199457	25609.5	12.8396
P50552	Vasodilator-stimulated phosphoprotein OS=Homo sapiens GN=VASP PE=1 SV=3 - [VASP_HUMAN]	SSSSVTTSETQPCTPSSSDYSDLQR	[13] DesthioBiotinIAM(new)	-0.000133134	0.155093	-0.177215	982.785	51.317	2945.33	3	4.87945	2.34708e+06	2.50725e+06	2.50992e+06	2.54616e+06	2.68996e+06	2.82411e+06	2.57075e+06	165388	6.43347	2.34771e+06	2.6393e+06	2.72452e+06	2.57051e+06	197599	7.68714	2.73364e+06	2.76703e+06	3.08686e+06	2.86251e+06	195005	6.8124	2.12697e+06	2.34073e+06	2.35307e+06	2.27359e+06	127130	5.59161
Q8N5D0	WD and tetratricopeptide repeats protein 1 OS=Homo sapiens GN=WDTC1 PE=1 SV=2 - [WDTC1_HUMAN]	AISLNPCHLK	[7] DesthioBiotinIAM(new)	0.0470783	0.0518426	-0.176895	464.601	50.3991	1390.78	3	5.11101	114835	118208	119175	121488	127791	128787	121714	5533.06	4.54595	111547	132440	133268	125751	12308.7	9.78814	117048	128555	132899	126167	8191.17	6.49231	94287.5	113754	114965	107669	11604.4	10.7779
P07237	Protein disulfide-isomerase OS=Homo sapiens GN=P4HB PE=1 SV=3 - [PDIA1_HUMAN]	ILEFFGLKKEECPAVR	[12] DesthioBiotinIAM(new)	0.10686	-0.202553	-0.175678	544.558	58.0407	2174.2	4	5.56011	1.12241e+06	1.21934e+06	1.26707e+06	1.33538e+06	1.35161e+06	1.63581e+06	1.32194e+06	174883	13.2293	1.33868e+06	1.41235e+06	1.51969e+06	1.42357e+06	91025.7	6.39418	991088	1.20482e+06	1.25043e+06	1.14878e+06	138455	12.0524	1.10022e+06	1.14663e+06	1.26429e+06	1.17038e+06	84573.2	7.22614
Q9H074	Polyadenylate-binding protein-interacting protein 1 OS=Homo sapiens GN=PAIP1 PE=1 SV=1 - [PAIP1_HUMAN]	TTPPPGAQCEVPASPQRPSRPGALPEQTRPLR	[9] DesthioBiotinIAM(new)	-0.23683	-0.212249	-0.175409	738.398	45.9444	3686.95	5	2.89032	924605	1.00857e+06	1.17283e+06	1.17795e+06	1.17836e+06	1.24137e+06	1.11728e+06	122342	10.95	859255	862677	1.12247e+06	948133	150987	15.9247	836475	1.0193e+06	1.0375e+06	964426	111182	11.5283	858178	963106	1.14683e+06	989370	146106	14.7676
Q96H55	Unconventional myosin-XIX OS=Homo sapiens GN=MYO19 PE=2 SV=2 - [MYO19_HUMAN]	HFSQAPCSLSTSPLQTR	[7] DesthioBiotinIAM(new)	-0.100077	-0.0957285	-0.175205	719.369	51.7127	2155.08	3	-0.341087	363927	368173	371603	390887	394224	398716	381255	15036.3	3.94389	346905	358854	361355	355705	7722.8	2.17113	312320	358068	399947	356779	43827.6	12.2843	328893	334557	349518	337656	10656	3.15586
Q01469	Fatty acid-binding protein, epidermal OS=Homo sapiens GN=FABP5 PE=1 SV=3 - [FABP5_HUMAN]	TTQFSCTLGEKFEETTADGR	[6] DesthioBiotinIAM(new)	-0.489272	-0.415476	-0.175152	839.74	56.3225	2516.2	3	5.34561	270798	276178	291831	320431	326390	331072	302784	26532.2	8.76276	170224	232140	244731	215698	39881.5	18.4895	180759	245164	255133	227019	40371.2	17.7832	216288	240862	347353	268167	69668.7	25.9795
P15924	Desmoplakin OS=Homo sapiens GN=DSP PE=1 SV=3 - [DESP_HUMAN]	RGVITDQNSDGYCQTGTMSR	[13] DesthioBiotinIAM(new)|[18] Oxidation	-0.328165	-0.282874	-0.175046	834.391	44.1228	2500.15	3	3.10959	241230	273760	286822	400399	422745	460031	347498	91144	26.2287	194677	304806	330914	276799	72308	26.1229	158758	218455	479667	285627	170674	59.7542	228529	259770	435078	307792	111334	36.1718
Q9Y277	Voltage-dependent anion-selective channel protein 3 OS=Homo sapiens GN=VDAC3 PE=1 SV=1 - [VDAC3_HUMAN]	TKSCSGVEFSTSGHAYTDTGK	[4] DesthioBiotinIAM(new)	-0.2576	-0.256541	-0.17459	615.547	44.0647	2458.16	4	6.83501	707863	711420	712631	728932	737533	777343	729287	26203.4	3.59301	585403	599608	645087	610033	31177.9	5.11086	594638	617767	619037	610481	13734.8	2.24983	633336	650163	654989	646162	11367.3	1.7592
P22626	Heterogeneous nuclear ribonucleoproteins A2/B1 OS=Homo sapiens GN=HNRNPA2B1 PE=1 SV=2 - [ROA2_HUMAN]	LTDCVVMRDPASK	[4] DesthioBiotinIAM(new)|[7] Oxidation	0.032014	-0.406038	-0.173781	582.97	44.9109	1745.89	3	4.04012	478204	481118	488757	523894	541002	586117	516515	42402.1	8.20927	467820	480290	636205	528105	93825.1	17.7664	291924	393340	484168	389811	96170.6	24.6711	448052	450355	475290	457899	15104.7	3.2987
Q86Y79	Probable peptidyl-tRNA hydrolase OS=Homo sapiens GN=PTRH1 PE=1 SV=1 - [PTH_HUMAN]	CVLEPRPPGKR	[1] DesthioBiotinIAM(new)	-0.19419	0.0853157	-0.173646	387.728	42.0267	1546.88	4	2.87343	112786	122934	125628	130777	131022	138051	126866	8635.96	6.80713	81991.7	111382	139294	110889	28654.3	25.8404	122589	137513	143684	134595	10846.1	8.0583	109604	112967	114868	112480	2665.6	2.36985
Q9BW85	Coiled-coil domain-containing protein 94 OS=Homo sapiens GN=CCDC94 PE=1 SV=1 - [CCD94_HUMAN]	AKADPDCSNGQPQAAPTPGAPQNR	[7] DesthioBiotinIAM(new)	-0.172826	0.322025	-0.17342	896.44	41.0086	2686.3	3	4.24624	99823.6	125946	126017	142372	145505	151260	131821	18806.9	14.2671	61600	138007	151208	116938	48376.9	41.3695	149638	166606	178116	164787	14326.1	8.69374	104487	113299	132885	116890	14535.6	12.4352
P0CB43	Protein FAM203B OS=Homo sapiens GN=FAM203B PE=1 SV=1 - [F203B_HUMAN]	HVLALTGCGPGR	[8] DesthioBiotinIAM(new)	-0.192978	-0.100729	-0.173082	492.944	48.6691	1475.81	3	3.97653	1.22866e+06	1.2988e+06	1.36985e+06	1.37546e+06	1.4177e+06	1.41791e+06	1.3514e+06	74258.7	5.49496	1.07131e+06	1.19332e+06	1.28197e+06	1.1822e+06	105769	8.9468	1.10948e+06	1.20338e+06	1.46793e+06	1.26026e+06	185872	14.7486	1.11431e+06	1.21729e+06	1.26424e+06	1.19862e+06	76688.6	6.3981
Q8NDI1	EH domain-binding protein 1 OS=Homo sapiens GN=EHBP1 PE=1 SV=3 - [EHBP1_HUMAN]	HNTNTATPFCNR	[10] DesthioBiotinIAM(new)	-0.187119	0.0121339	-0.17244	557.942	43.6386	1670.8	3	5.28825	261617	262550	269794	279408	280817	284380	273094	9804.79	3.59026	202517	252400	264706	239875	32932.3	13.729	273156	273549	279498	275401	3553.78	1.2904	232900	236182	257901	242328	13586.6	5.6067
Q8NB90	Spermatogenesis-associated protein 5 OS=Homo sapiens GN=SPATA5 PE=1 SV=3 - [SPAT5_HUMAN]	LNQSAENGSSLPSAASSCAEAR	[18] DesthioBiotinIAM(new)	-0.0859555	-0.156932	-0.172414	816.063	49.2779	2445.17	3	4.99627	321253	324471	325884	340659	344291	345888	333741	11048.1	3.31039	253112	344037	346164	314438	53120	16.8937	249103	312551	336374	299342	45110	15.0697	285410	297226	305805	296147	10240.2	3.4578
P00390	Glutathione reductase, mitochondrial OS=Homo sapiens GN=GSR PE=1 SV=2 - [GSHR_HUMAN]	LGGTCVNVGCVPK	[5] DesthioBiotinIAM(new)|[10] Carbamidomethyl	0.053599	-0.0118354	-0.172097	800.423	52.697	1598.83	2	3.23099	5.83304e+06	6.65752e+06	7.00688e+06	7.35151e+06	7.51608e+06	7.81151e+06	7.02942e+06	710268	10.1042	6.85244e+06	7.35088e+06	7.68316e+06	7.29549e+06	418118	5.73118	5.52916e+06	7.04566e+06	8.34116e+06	6.97199e+06	1.40745e+06	20.1872	5.60727e+06	6.12205e+06	6.98762e+06	6.23898e+06	697562	11.1807
O00154	Cytosolic acyl coenzyme A thioester hydrolase OS=Homo sapiens GN=ACOT7 PE=1 SV=3 - [BACH_HUMAN]	TDFLSPMCIGEVAHVSAEITYTSK	[7] Oxidation|[8] DesthioBiotinIAM(new)	-0.178539	-0.242018	-0.171992	971.15	67.9053	2910.43	3	5.15468	2.74013e+06	2.95858e+06	3.17004e+06	3.83849e+06	4.59419e+06	4.82692e+06	3.68806e+06	876329	23.7613	2.52514e+06	3.25038e+06	4.00075e+06	3.25876e+06	737837	22.6417	1.73359e+06	1.97996e+06	5.64188e+06	3.11848e+06	2.1888e+06	70.188	2.88125e+06	3.0312e+06	3.90828e+06	3.27358e+06	554759	16.9466
P11387	DNA topoisomerase 1 OS=Homo sapiens GN=TOP1 PE=1 SV=2 - [TOP1_HUMAN]	AVAILCNHQR	[6] DesthioBiotinIAM(new)	-0.326067	-0.0904531	-0.171553	474.269	45.6928	1419.78	3	5.16232	181767	184199	185664	191048	198301	202847	190638	8400.55	4.40654	145062	148628	162531	152073	9229.9	6.06937	174897	181068	181192	179052	3598.96	2.01	156728	172458	178608	169265	11283.9	6.66642
P17844	Probable ATP-dependent RNA helicase DDX5 OS=Homo sapiens GN=DDX5 PE=1 SV=1 - [DDX5_HUMAN]	STCIYGGAPK	[3] DesthioBiotinIAM(new)	-0.230651	-0.124809	-0.171107	646.839	48.6691	1291.66	2	3.52286	799706	837709	861859	971709	987524	1.0094e+06	911318	88765.1	9.7403	719848	775754	834410	776671	57286.6	7.37592	724687	890442	892248	835793	96224.4	11.5129	753723	837036	837430	809397	48214.9	5.95689
Q9NQW6	Actin-binding protein anillin OS=Homo sapiens GN=ANLN PE=1 SV=2 - [ANLN_HUMAN]	QNSVQEQPGTACLSK	[12] DesthioBiotinIAM(new)	-0.338569	-0.0787137	-0.170934	629.322	46.6022	1884.94	3	4.14695	172510	173298	185660	187653	194514	196238	184979	10170.9	5.49839	133794	147755	157309	146286	11826.5	8.08448	168208	171118	186145	175157	9626.55	5.49597	150941	159386	182604	164311	16395.9	9.97857
Q12765	Secernin-1 OS=Homo sapiens GN=SCRN1 PE=1 SV=2 - [SCRN1_HUMAN]	TQSPCFGDDDPAKKEPR	[5] DesthioBiotinIAM(new)	-0.380949	-0.0849038	-0.170839	547.519	42.7511	2186.05	4	2.34256	1.82025e+06	1.85674e+06	2.0321e+06	2.03841e+06	2.11051e+06	2.27634e+06	2.02239e+06	167873	8.3007	1.43658e+06	1.50209e+06	1.7205e+06	1.55306e+06	148665	9.57237	1.77867e+06	1.86733e+06	2.07442e+06	1.90681e+06	151773	7.95956	1.34569e+06	1.66062e+06	2.38332e+06	1.79654e+06	532001	29.6125
Q86Y37	CDK2-associated and cullin domain-containing protein 1 OS=Homo sapiens GN=CACUL1 PE=1 SV=1 - [CACL1_HUMAN]	SCDAAAAVAK	[2] DesthioBiotinIAM(new)	-0.182178	-0.451325	-0.170804	601.816	43.2059	1201.62	2	4.37614	212662	223301	223831	223969	224287	228858	222818	5373.56	2.41163	176393	205384	207380	196386	17342.7	8.83094	77804	178325	232759	162963	78611.5	48.2389	180611	205731	207478	197940	15032.6	7.59451
Q92817	Envoplakin OS=Homo sapiens GN=EVPL PE=1 SV=3 - [EVPL_HUMAN]	VTQECAEYR	[5] DesthioBiotinIAM(new)	-0.254047	-0.167327	-0.170534	697.841	42.7668	1393.67	2	1.68218	1.12076e+06	1.17609e+06	1.24921e+06	1.28198e+06	1.48178e+06	1.5108e+06	1.30344e+06	159872	12.2654	1.03426e+06	1.04074e+06	1.20395e+06	1.09299e+06	96156.9	8.79764	979333	1.06814e+06	1.43463e+06	1.1607e+06	241349	20.7934	1.00041e+06	1.06481e+06	1.40915e+06	1.15812e+06	219766	18.9761
Q6IBS0	Twinfilin-2 OS=Homo sapiens GN=TWF2 PE=1 SV=2 - [TWF2_HUMAN]	AVLPLLDAQQPCYLLYR	[12] DesthioBiotinIAM(new)	-0.453466	-0.255079	-0.170356	758.092	74.5934	2271.25	3	3.48656	233802	242614	244676	249743	250989	261675	247250	9351.39	3.78216	166034	187684	187971	180563	12583.1	6.96879	113143	236203	272197	207181	83403.8	40.2565	200617	212524	245995	219712	23527.6	10.7084
O14879	Interferon-induced protein with tetratricopeptide repeats 3 OS=Homo sapiens GN=IFIT3 PE=1 SV=1 - [IFIT3_HUMAN]	YCNLQK	[2] DesthioBiotinIAM(new)	-0.076603	-0.249427	-0.170162	532.783	42.3052	1063.55	2	3.11705	202982	218616	280748	281513	292490	293429	261630	40035.4	15.3023	197850	253618	292832	248100	47730.6	19.2384	72552.5	269426	318294	220091	130087	59.1062	214480	236809	246275	232521	16325.7	7.02114
P10644	cAMP-dependent protein kinase type I-alpha regulatory subunit OS=Homo sapiens GN=PRKAR1A PE=1 SV=1 - [KAP0_HUMAN]	VLGPCSDILKR	[5] DesthioBiotinIAM(new)	0.0117461	-0.200078	-0.169854	499.627	52.2987	1495.86	3	2.43398	189492	191236	200108	201917	212989	230280	204337	15255.5	7.46587	195741	207588	214694	206008	9575.05	4.64791	163995	184388	185245	177876	12028.8	6.76247	164283	185138	195505	181642	15902.3	8.75475
P30153	Serine/threonine-protein phosphatase 2A 65 kDa regulatory subunit A alpha isoform OS=Homo sapiens GN=PPP2R1A PE=1 SV=4 - [2AAA_HUMAN]	VKEFCENLSADCR	[5] Carbamidomethyl|[12] DesthioBiotinIAM(new)	-0.243942	-0.298454	-0.169792	622.969	48.1484	1865.88	3	4.41891	1.23405e+06	1.23788e+06	1.26636e+06	1.27625e+06	1.30011e+06	1.3625e+06	1.27953e+06	47528.8	3.71457	1.0484e+06	1.08741e+06	1.10562e+06	1.08048e+06	29232.4	2.70551	960754	1.04048e+06	1.12001e+06	1.04041e+06	79626.8	7.65339	1.07989e+06	1.14752e+06	1.18498e+06	1.13746e+06	53261.7	4.68251
Q9NSD9	Phenylalanine--tRNA ligase beta subunit OS=Homo sapiens GN=FARSB PE=1 SV=3 - [SYFB_HUMAN]	TKEYTACELMNIYK	[7] DesthioBiotinIAM(new)|[10] Oxidation	-0.0996659	-0.246881	-0.168837	673.672	52.8403	2017.99	3	4.53506	1.7377e+06	1.75804e+06	2.20114e+06	3.49039e+06	3.62725e+06	3.91634e+06	2.78848e+06	997917	35.7872	1.99077e+06	2.1296e+06	3.68666e+06	2.60234e+06	941608	36.1831	1.23947e+06	1.40301e+06	4.4072e+06	2.3499e+06	1.78355e+06	75.8992	1.76564e+06	1.81773e+06	3.85818e+06	2.48052e+06	1.19338e+06	48.1101
Q6ICB0	Desumoylating isopeptidase 1 OS=Homo sapiens GN=DESI1 PE=1 SV=1 - [DESI1_HUMAN]	GEAYNLFEHNCNTFSNEVAQFLTGR	[11] DesthioBiotinIAM(new)	0.139338	-0.0969844	-0.168723	1053.17	75.449	3156.49	3	4.90078	5.5145e+06	5.60215e+06	5.75526e+06	6.24131e+06	6.83113e+06	6.88377e+06	6.13802e+06	611499	9.96248	6.18671e+06	6.92722e+06	7.16731e+06	6.76041e+06	511138	7.56075	5.43029e+06	5.75807e+06	6.02852e+06	5.73896e+06	299574	5.22001	4.99904e+06	5.05769e+06	6.32497e+06	5.46057e+06	749172	13.7197
O95544	NAD kinase OS=Homo sapiens GN=NADK PE=1 SV=1 - [NADK_HUMAN]	SLHGPCPVTTFGPK	[6] DesthioBiotinIAM(new)	-0.304453	-0.365851	-0.168527	579.646	51.4459	1735.92	3	5.04874	121228	122070	129782	146576	147849	154193	136950	14343.8	10.4738	95675.2	108678	128332	110895	16441	14.8257	101722	107648	109453	106274	4044.23	3.80546	95865.3	113834	155854	121851	30787.6	25.2665
Q08379	Golgin subfamily A member 2 OS=Homo sapiens GN=GOLGA2 PE=1 SV=3 - [GOGA2_HUMAN]	QQNQEITDQLEEEKKECHQK	[17] DesthioBiotinIAM(new)	-0.0929914	0.111555	-0.168421	557.077	41.9776	2780.35	5	3.1397	538494	550734	564369	620798	649199	649317	595485	50284.4	8.44428	487761	579076	608101	558313	62799.4	11.2481	537829	651719	740523	643357	101605	15.793	508802	533148	547666	529872	19638.1	3.70621
P48739	Phosphatidylinositol transfer protein beta isoform OS=Homo sapiens GN=PITPNB PE=1 SV=2 - [PIPNB_HUMAN]	ELANSPDCPQMCAYK	[8] DesthioBiotinIAM(new)|[11] Oxidation|[12] Carbamidomethyl	-0.278723	-0.290002	-0.168379	1019.96	47.7118	2037.9	2	4.11151	457455	534667	535332	888575	966041	988492	728427	244130	33.5147	410118	624274	766979	600457	179619	29.9137	281425	377738	1.12818e+06	595781	463578	77.8102	460559	529873	954123	648185	267207	41.2239
P14866	Heterogeneous nuclear ribonucleoprotein L OS=Homo sapiens GN=HNRNPL PE=1 SV=2 - [HNRPL_HUMAN]	LCFSTAQHAS	[2] DesthioBiotinIAM(new)	-0.09093	-0.100586	-0.168121	680.841	51.4775	1359.67	2	4.89413	1.79995e+06	1.81081e+06	1.81295e+06	1.82297e+06	1.8689e+06	1.87098e+06	1.83109e+06	30974.5	1.69159	1.63368e+06	1.68873e+06	1.83533e+06	1.71924e+06	104232	6.06264	1.50499e+06	1.64228e+06	1.97605e+06	1.70778e+06	242263	14.1859	1.47324e+06	1.63651e+06	1.77927e+06	1.62967e+06	153132	9.39645
P16455	Methylated-DNA--protein-cysteine methyltransferase OS=Homo sapiens GN=MGMT PE=1 SV=1 - [MGMT_HUMAN]	GNPVPILIPCHR	[10] DesthioBiotinIAM(new)	-0.358538	-0.579154	-0.167966	537.979	57.2479	1610.92	3	5.29529	2.40677e+06	2.49226e+06	2.5842e+06	2.79733e+06	2.87414e+06	3.09187e+06	2.70776e+06	259053	9.56707	1.98676e+06	2.0657e+06	2.28334e+06	2.11193e+06	153603	7.27311	1.68651e+06	1.81491e+06	1.93595e+06	1.81246e+06	124736	6.88214	1.78585e+06	2.34343e+06	3.10122e+06	2.41017e+06	660221	27.3932
Q00839	Heterogeneous nuclear ribonucleoprotein U OS=Homo sapiens GN=HNRNPU PE=1 SV=6 - [HNRPU_HUMAN]	AVVVCPKDEDYKQR	[5] DesthioBiotinIAM(new)	-0.257667	-0.0684915	-0.167928	487.262	41.8169	1945.02	4	4.34139	1.12218e+06	1.18412e+06	1.18769e+06	1.32736e+06	1.34455e+06	1.38722e+06	1.25885e+06	107558	8.54414	859583	1.05383e+06	1.24544e+06	1.05295e+06	192932	18.3229	1.11911e+06	1.21915e+06	1.26319e+06	1.20048e+06	73832.1	6.1502	1.02026e+06	1.05665e+06	1.28468e+06	1.12053e+06	143322	12.7906
Q00613	Heat shock factor protein 1 OS=Homo sapiens GN=HSF1 PE=1 SV=1 - [HSF1_HUMAN]	VVHIEQGGLVKPERDDTEFQHPCFLR	[23] DesthioBiotinIAM(new)	-0.200249	-0.182265	-0.167676	669.951	53.0926	3344.72	5	3.16235	240161	303228	306812	327333	341669	345809	310835	38768.3	12.4723	194756	281490	335407	270551	70960.6	26.2282	237420	279368	305047	273945	34138.2	12.4617	252473	287756	289959	276729	21035.5	7.60146
P35658	Nuclear pore complex protein Nup214 OS=Homo sapiens GN=NUP214 PE=1 SV=2 - [NU214_HUMAN]	TSCKDDEAVVQAPR	[3] DesthioBiotinIAM(new)	-0.19451	0.0271593	-0.167597	605.643	43.3154	1813.91	3	4.34284	493615	504139	504390	517340	528174	539243	514483	17047	3.31341	417804	438145	492825	449592	38798.5	8.62972	512774	524065	535943	524261	11585.6	2.2099	420330	453190	500651	458057	40381	8.81572
O75439	Mitochondrial-processing peptidase subunit beta OS=Homo sapiens GN=PMPCB PE=1 SV=2 - [MPPB_HUMAN]	VTCLESGLR	[3] DesthioBiotinIAM(new)	-0.0910984	-0.0517475	-0.167352	637.354	52.4789	1272.69	2	5.06592	426126	427137	429677	468797	473423	483977	451523	26639.1	5.89983	401732	431416	438531	423893	19519.1	4.60471	380706	457857	468280	435614	47836.5	10.9814	380912	399762	425535	402070	22400.7	5.57134
P60981	Destrin OS=Homo sapiens GN=DSTN PE=1 SV=3 - [DEST_HUMAN]	LGGSLIVAFEGCPV	[12] DesthioBiotinIAM(new)	-0.422726	0.20078	-0.167161	829.457	78.3243	1656.9	2	4.66252	1.8622e+07	2.119e+07	2.23098e+07	2.28e+07	2.30219e+07	2.42082e+07	2.20253e+07	1.93493e+06	8.78505	1.58078e+07	1.64361e+07	1.70496e+07	1.64312e+07	620923	3.77894	1.36001e+07	2.77979e+07	3.45442e+07	2.53141e+07	1.06907e+07	42.2321	1.84987e+07	1.97455e+07	2.06026e+07	1.96156e+07	1.05796e+06	5.39347
Q7Z6Z7	E3 ubiquitin-protein ligase HUWE1 OS=Homo sapiens GN=HUWE1 PE=1 SV=3 - [HUWE1_HUMAN]	SCGSSSHENRPLDLLHK	[2] DesthioBiotinIAM(new)	-0.286038	0.0816889	-0.166652	544.781	43.7459	2175.1	4	4.47773	733239	791228	813980	839356	847356	948685	828974	71541.7	8.63015	552525	668628	818499	679884	133344	19.6128	839663	856819	935318	877267	51000.2	5.81353	732946	733636	749036	738539	9096.81	1.23173
Q5H9R7	Serine/threonine-protein phosphatase 6 regulatory subunit 3 OS=Homo sapiens GN=PPP6R3 PE=1 SV=2 - [PP6R3_HUMAN]	LSTSQDAACKDAEECPETAEAK	[9] DesthioBiotinIAM(new)|[15] Carbamidomethyl	-0.22409	0.0480652	-0.16659	884.074	43.4778	2649.2	3	3.65322	844860	862270	929380	937591	960133	1.00175e+06	922664	59375.6	6.43524	761630	795815	812329	789925	25857.7	3.27343	913447	939144	1.00917e+06	953921	49544.6	5.19379	773344	776756	916032	822044	81413.9	9.90384
O14950	Myosin regulatory light chain 12B OS=Homo sapiens GN=MYL12B PE=1 SV=2 - [ML12B_HUMAN]	NAFACFDEEATGTIQEDYLR	[5] DesthioBiotinIAM(new)	-0.259415	-0.314569	-0.166372	863.74	68.6704	2588.2	3	5.05412	1.75569e+06	1.77224e+06	2.09562e+06	2.18522e+06	2.34475e+06	2.46124e+06	2.10246e+06	291074	13.8445	1.69514e+06	1.72059e+06	1.85362e+06	1.75645e+06	85108.6	4.84549	1.33783e+06	1.58077e+06	2.15311e+06	1.69057e+06	418582	24.7599	1.80328e+06	1.85831e+06	1.95879e+06	1.87346e+06	78856.2	4.20912
A1L020	RNA-binding protein MEX3A OS=Homo sapiens GN=MEX3A PE=1 SV=1 - [MEX3A_HUMAN]	VHQPGCKPLSTFR	[6] DesthioBiotinIAM(new)	-0.0915245	-0.0994827	-0.164758	442.246	43.1146	1764.95	4	4.61311	97664.9	100356	103404	109374	110055	111244	105350	5671.98	5.38395	97100.2	98299.6	101222	98874	2120.19	2.14433	83345.6	96563	115082	98330.1	15941.8	16.2125	92588.5	93196	96156.3	93980.3	1908.79	2.03106
Q9NZB2	Constitutive coactivator of PPAR-gamma-like protein 1 OS=Homo sapiens GN=FAM120A PE=1 SV=2 - [F120A_HUMAN]	VAAASGHCGAFSGSDSSR	[8] DesthioBiotinIAM(new)	0.00775105	0.26521	-0.164066	654.977	41.1598	1961.91	3	3.82292	3.40259e+06	3.45055e+06	3.51802e+06	3.56285e+06	3.6136e+06	3.79942e+06	3.55784e+06	140493	3.94882	3.03612e+06	3.7379e+06	3.95699e+06	3.577e+06	481055	13.4486	4.1093e+06	4.27776e+06	4.44049e+06	4.27585e+06	165607	3.87307	3.15631e+06	3.18285e+06	3.18703e+06	3.17539e+06	16661	0.524692
P14923	Junction plakoglobin OS=Homo sapiens GN=JUP PE=1 SV=3 - [PLAK_HUMAN]	GIMEEDEACGR	[3] Oxidation|[9] DesthioBiotinIAM(new)	-0.289647	-0.248649	-0.163943	761.337	43.949	1520.66	2	-0.290429	573896	588973	633978	798771	801984	844054	706943	121002	17.1162	489969	587697	657388	578351	84099.7	14.5413	394715	488863	901489	595023	269550	45.3008	531552	588096	773366	631005	126488	20.0455
O00148	ATP-dependent RNA helicase DDX39A OS=Homo sapiens GN=DDX39A PE=1 SV=2 - [DX39A_HUMAN]	AIVDCGFEHPSEVQHECIPQAILGMDVLCQAK	[5] DesthioBiotinIAM(new)|[17] Carbamidomethyl|[25] Oxidation|[29] Carbamidomethyl	-0.093556	-0.157271	-0.163714	977.472	63.501	3905.86	4	0.781505	3.98295e+06	4.28422e+06	4.31548e+06	4.47081e+06	4.52914e+06	4.66337e+06	4.37433e+06	237310	5.42506	3.47132e+06	3.63739e+06	5.19028e+06	4.09966e+06	948141	23.1273	2.99247e+06	3.88056e+06	4.89461e+06	3.92255e+06	951764	24.2639	3.4003e+06	3.74131e+06	4.57359e+06	3.90507e+06	603542	15.4553
Q12959	Disks large homolog 1 OS=Homo sapiens GN=DLG1 PE=1 SV=2 - [DLG1_HUMAN]	LLAVNNVCLEEVTHEEAVTALK	[8] DesthioBiotinIAM(new)	-0.0284725	-0.10616	-0.163714	897.821	64.6322	2690.44	3	3.94083	1.73069e+07	1.83798e+07	1.92454e+07	1.93008e+07	1.94658e+07	1.99417e+07	1.89401e+07	947038	5.00018	1.77595e+07	1.87392e+07	1.92111e+07	1.85699e+07	740490	3.98758	1.68764e+07	1.71762e+07	1.87366e+07	1.75964e+07	998727	5.67574	1.65661e+07	1.67971e+07	1.73615e+07	1.69083e+07	409172	2.41995
Q32MZ4	Leucine-rich repeat flightless-interacting protein 1 OS=Homo sapiens GN=LRRFIP1 PE=1 SV=2 - [LRRF1_HUMAN]	IAAESSENVDCPENPK	[11] DesthioBiotinIAM(new)	-0.149245	0.0150584	-0.163656	999.979	45.9677	1997.94	2	3.10645	2.97068e+06	3.14625e+06	3.25347e+06	3.31327e+06	3.44892e+06	3.6051e+06	3.28962e+06	223180	6.78439	2.39912e+06	3.19362e+06	3.30622e+06	2.96632e+06	494422	16.6679	2.99517e+06	3.47106e+06	3.50616e+06	3.32413e+06	285426	8.58648	2.7997e+06	2.82646e+06	3.18435e+06	2.93684e+06	214771	7.31301
P52789	Hexokinase-2 OS=Homo sapiens GN=HK2 PE=1 SV=2 - [HXK2_HUMAN]	AILQHLGLESTCDDSIIVK	[12] DesthioBiotinIAM(new)	-0.107292	-0.319903	-0.163253	784.43	61.7834	2350.27	3	4.55269	264765	269305	272399	277101	289332	297139	278340	12465.7	4.4786	225726	259144	290303	258391	32295.1	12.4985	165436	248327	255192	222985	49956.5	22.4036	245142	246792	253747	248560	4566.76	1.83729
P11802	Cyclin-dependent kinase 4 OS=Homo sapiens GN=CDK4 PE=1 SV=2 - [CDK4_HUMAN]	LMDVCATSR	[2] Oxidation|[5] DesthioBiotinIAM(new)	-0.146616	-0.262464	-0.163247	654.327	45.9833	1306.64	2	1.37708	243195	252531	257569	294468	348511	363002	293213	51686.1	17.6275	233280	254358	306998	264879	37968.8	14.3344	185922	202274	345126	244441	87578.3	35.8281	207201	233295	345032	261843	73215.5	27.9617
P30153	Serine/threonine-protein phosphatase 2A 65 kDa regulatory subunit A alpha isoform OS=Homo sapiens GN=PPP2R1A PE=1 SV=4 - [2AAA_HUMAN]	TDLVPAFQNLMKDCEAEVR	[11] Oxidation|[14] DesthioBiotinIAM(new)	-0.235244	-0.304022	-0.163207	831.087	61.7664	2490.24	3	5.46739	2.12928e+06	2.15004e+06	2.35669e+06	3.22693e+06	3.315e+06	3.32765e+06	2.75093e+06	596710	21.6912	1.89004e+06	2.31767e+06	2.80337e+06	2.33703e+06	456972	19.5535	1.50427e+06	1.51096e+06	3.66945e+06	2.22823e+06	1.24814e+06	56.015	2.10488e+06	2.14145e+06	3.12372e+06	2.45668e+06	577959	23.526
Q96EY4	Translation machinery-associated protein 16 OS=Homo sapiens GN=TMA16 PE=1 SV=2 - [TMA16_HUMAN]	ICANDAIPK	[2] DesthioBiotinIAM(new)	-0.19794	-0.0715204	-0.162964	620.842	50.8136	1239.67	2	4.51167	268871	272512	280168	280761	298559	304974	284308	14403.9	5.06632	231853	237101	274620	247858	23324.5	9.41042	219105	264972	327594	270557	54459.5	20.1287	244761	250818	266241	253940	11075	4.36127
Q5VUA4	Zinc finger protein 318 OS=Homo sapiens GN=ZNF318 PE=1 SV=2 - [ZN318_HUMAN]	SDYSPHISCHDELLR	[9] DesthioBiotinIAM(new)	-0.176089	0.049729	-0.162492	517.756	50.0628	2067	4	5.57418	130520	133633	137018	140755	141588	145409	138154	5498.95	3.98031	113731	122738	130371	122280	8329.27	6.81165	133406	145284	150307	142999	8678.92	6.06922	118774	123208	128331	123438	4782.68	3.87457
Q92945	Far upstream element-binding protein 2 OS=Homo sapiens GN=KHSRP PE=1 SV=4 - [FUBP2_HUMAN]	IAHIMGPPDRCEHAAR	[5] Oxidation|[11] DesthioBiotinIAM(new)	-0.0506142	-0.202844	-0.162385	418.016	37.6177	2085.05	5	4.33486	174558	183355	214870	231730	247394	308035	226657	48592.9	21.439	204533	215433	236563	218843	16285.1	7.44147	141672	189366	259745	196928	59398.4	30.1625	132678	205593	269315	202529	68370	33.7582
Q15654	Thyroid receptor-interacting protein 6 OS=Homo sapiens GN=TRIP6 PE=1 SV=3 - [TRIP6_HUMAN]	AYHPGCFTCVVCHR	[6] Carbamidomethyl|[9] Carbamidomethyl|[12] DesthioBiotinIAM(new)	-0.0932271	-0.0668488	-0.162255	501.488	47.7587	2001.92	4	4.74897	84495.7	92451	96471.2	100111	103861	104697	97014.5	7659.31	7.89502	80393.5	86256.9	106181	90943.7	13517.4	14.8635	77816.5	98737.9	101311	92621.8	12886.2	13.9127	69205.2	90473.3	100406	86694.8	15939.9	18.3862
P56192	Methionine--tRNA ligase, cytoplasmic OS=Homo sapiens GN=MARS PE=1 SV=2 - [SYMC_HUMAN]	SCPVVQSSQHLFLDLPK	[2] DesthioBiotinIAM(new)	-0.0910917	-0.284587	-0.162209	732.065	61.9602	2193.17	3	5.64771	1.31302e+06	1.33344e+06	1.46023e+06	1.55102e+06	1.55337e+06	1.55997e+06	1.46184e+06	113662	7.77527	1.35479e+06	1.36546e+06	1.39695e+06	1.3724e+06	21922.2	1.59736	1.02978e+06	1.10456e+06	1.46608e+06	1.20014e+06	233325	19.4414	1.25893e+06	1.27479e+06	1.38543e+06	1.30639e+06	68914.2	5.27518
P23497	Nuclear autoantigen Sp-100 OS=Homo sapiens GN=SP100 PE=1 SV=3 - [SP100_HUMAN]	EMPCPLPCDEESPEAELHNHGIQINSCSVR	[2] Oxidation|[4] DesthioBiotinIAM(new)|[8] Carbamidomethyl|[27] Carbamidomethyl	-0.665203	-0.364644	-0.161902	940.929	55.7009	3759.69	4	3.42335	3.42382e+06	3.64213e+06	4.99181e+06	5.01427e+06	5.36239e+06	5.42998e+06	4.64407e+06	881421	18.9795	2.60928e+06	2.97757e+06	3.19879e+06	2.92855e+06	297799	10.1688	2.514e+06	2.74847e+06	5.55812e+06	3.60686e+06	1.6939e+06	46.9632	3.48749e+06	3.79713e+06	5.16861e+06	4.15108e+06	894707	21.5536
Q96I24	Far upstream element-binding protein 3 OS=Homo sapiens GN=FUBP3 PE=1 SV=2 - [FUBP3_HUMAN]	CGLVIGK	[1] DesthioBiotinIAM(new)	0.0918791	0.211599	-0.161833	493.299	52.7216	984.583	2	4.50011	93297.3	95356.6	100074	103676	104431	104586	100237	4905.9	4.8943	100752	106191	113542	106828	6418.57	6.00831	85799.3	130738	131677	116072	26220.7	22.5902	85758.4	88332.3	94711.4	89600.7	4609.27	5.14423
P49915	GMP synthase [glutamine-hydrolyzing] OS=Homo sapiens GN=GMPS PE=1 SV=1 - [GUAA_HUMAN]	ACTTEEDQEKLMQITSLHSLNAFLLPIK	[2] DesthioBiotinIAM(new)|[12] Oxidation	-0.157058	-0.291546	-0.161822	872.21	69.043	3484.81	4	5.14721	2.94404e+06	3.40071e+06	3.49976e+06	3.5689e+06	3.80448e+06	3.84085e+06	3.50979e+06	326192	9.29378	2.55768e+06	3.3152e+06	3.57041e+06	3.14776e+06	526722	16.7332	2.47618e+06	2.51796e+06	3.60863e+06	2.86759e+06	642101	22.3917	2.64203e+06	2.94463e+06	3.8255e+06	3.13738e+06	614830	19.5969
Q13123	Protein Red OS=Homo sapiens GN=IK PE=1 SV=3 - [RED_HUMAN]	SKADCPTMEAQTTLTTNDIVISK	[5] DesthioBiotinIAM(new)|[8] Oxidation	-0.319417	-0.426557	-0.161657	927.137	54.2976	2778.39	3	4.26032	243662	281821	309803	414096	459953	461130	361744	95175.6	26.3102	226913	238511	404274	289899	99221	34.226	155546	213469	438436	269150	149439	55.5225	259233	287146	423816	323398	88077.1	27.2348
O00469	Procollagen-lysine,2-oxoglutarate 5-dioxygenase 2 OS=Homo sapiens GN=PLOD2 PE=1 SV=2 - [PLOD2_HUMAN]	DKLDPDMALCR	[7] Oxidation|[10] DesthioBiotinIAM(new)	0.220496	-0.0825028	-0.161534	530.268	50.3322	1587.78	3	3.926	161157	194474	199745	207418	207525	209731	196675	18326.9	9.31834	164814	221808	300836	229153	68308.1	29.809	152262	188868	216101	185744	32034.1	17.2464	163295	171501	192731	175842	15190.6	8.6388
Q9GZU8	Protein FAM192A OS=Homo sapiens GN=FAM192A PE=1 SV=1 - [F192A_HUMAN]	LKPDPEPDDKNQEPSSCK	[17] DesthioBiotinIAM(new)	0.0811648	0.247305	-0.161288	581.54	37.7351	2322.13	4	6.35151	1.03921e+06	1.04089e+06	1.14342e+06	1.19194e+06	1.30303e+06	1.31019e+06	1.17145e+06	120248	10.2649	1.08051e+06	1.31423e+06	1.32297e+06	1.23924e+06	137531	11.098	1.03326e+06	1.55431e+06	1.58391e+06	1.39049e+06	309725	22.2745	889242	1.05899e+06	1.19438e+06	1.04754e+06	152893	14.5955
Q92667	A-kinase anchor protein 1, mitochondrial OS=Homo sapiens GN=AKAP1 PE=1 SV=1 - [AKAP1_HUMAN]	VCQASQLQGQKEESCVPVHQK	[2] DesthioBiotinIAM(new)|[15] Carbamidomethyl	-0.278346	0.170135	-0.161245	670.592	41.1846	2678.34	4	4.30592	639944	666621	702030	710216	710684	711044	690090	29920.8	4.33579	452164	624431	630416	569004	101230	17.7908	714095	774487	840810	776464	63380.6	8.16271	584647	592896	673802	617115	49265.6	7.98321
O95757	Heat shock 70 kDa protein 4L OS=Homo sapiens GN=HSPA4L PE=1 SV=3 - [HS74L_HUMAN]	CTPACISLGSR	[1] DesthioBiotinIAM(new)|[5] Carbamidomethyl	-0.00228081	-0.106007	-0.161245	730.873	52.6444	1459.73	2	2.5854	166812	174909	175407	182409	183673	189808	178836	8103.23	4.53109	138040	177446	220175	178554	41079	23.0065	144627	171622	182252	166167	19396.4	11.6729	150525	159176	170074	159925	9795.79	6.12524
O43143	Putative pre-mRNA-splicing factor ATP-dependent RNA helicase DHX15 OS=Homo sapiens GN=DHX15 PE=1 SV=2 - [DHX15_HUMAN]	FQIYFDNCPLLTIPGR	[8] DesthioBiotinIAM(new)	-0.146679	-0.184474	-0.161237	731.726	76.1572	2192.16	3	4.99146	305628	322866	338025	370945	380184	391130	351463	34284.6	9.75482	316624	317017	318817	317486	1169.41	0.368333	205569	360188	362074	309277	89818.7	29.0415	288479	308585	345831	314298	29099.9	9.25868
O96028	Histone-lysine N-methyltransferase NSD2 OS=Homo sapiens GN=WHSC1 PE=1 SV=1 - [NSD2_HUMAN]	SYCCEHDLGAASVR	[3] Carbamidomethyl|[4] DesthioBiotinIAM(new)	-0.233375	0.0734362	-0.161208	621.956	46.0187	1862.85	3	2.70127	164143	166109	166653	187791	193866	211178	181624	19140.2	10.5384	125348	165579	172564	154497	25484.4	16.4951	180469	185158	207697	191108	14556.5	7.61692	154158	161628	171479	162422	8687.5	5.34874
P35579	Myosin-9 OS=Homo sapiens GN=MYH9 PE=1 SV=4 - [MYH9_HUMAN]	MEDSVGCLETAEEVKR	[1] Oxidation|[7] DesthioBiotinIAM(new)	-0.12469	-0.245746	-0.161031	703.341	49.9261	2107	3	4.5412	2.05328e+06	2.06284e+06	2.41904e+06	3.03046e+06	3.16723e+06	3.39887e+06	2.68862e+06	586226	21.804	1.82447e+06	2.57632e+06	2.99721e+06	2.466e+06	594102	24.0917	1.63001e+06	1.84946e+06	3.3231e+06	2.26753e+06	920719	40.6046	2.11981e+06	2.28911e+06	2.80506e+06	2.40466e+06	356936	14.8435
Q9H6Y2	WD repeat-containing protein 55 OS=Homo sapiens GN=WDR55 PE=1 SV=2 - [WDR55_HUMAN]	VVGSVGQHTGEPVEELALSHCGR	[21] DesthioBiotinIAM(new)	-0.0344736	-0.100296	-0.16099	665.096	51.7763	2656.35	4	5.69148	894003	903001	927791	935439	960282	1.035e+06	942586	51088.3	5.42001	915061	917765	928161	920329	6915.8	0.751449	761162	926422	950264	879283	102987	11.7127	753888	850686	924604	843059	85613.2	10.1551
Q96IF1	LIM domain-containing protein ajuba OS=Homo sapiens GN=AJUBA PE=1 SV=1 - [AJUBA_HUMAN]	HSVTGYGDCAVGAR	[9] DesthioBiotinIAM(new)	-0.244023	0.0431241	-0.16084	563.613	43.9335	1687.82	3	4.44031	502022	528847	551797	558098	596501	613069	558389	41318.3	7.39955	424639	452328	537524	471497	58833	12.4779	528222	579710	618063	575332	45080.1	7.83549	476775	510773	510896	499481	19664.3	3.93694
Q92817	Envoplakin OS=Homo sapiens GN=EVPL PE=1 SV=3 - [EVPL_HUMAN]	QKQVCAGQYGPGMAELEQQIAEHNILQK	[5] DesthioBiotinIAM(new)|[13] Oxidation	-0.366503	-0.384343	-0.160783	856.689	57.8166	3422.73	4	5.24774	1.08511e+06	1.3247e+06	1.39601e+06	1.71648e+06	1.86973e+06	2.1433e+06	1.58922e+06	390720	24.5856	968944	1.05238e+06	1.67677e+06	1.2327e+06	386835	31.3812	779030	794064	2.07955e+06	1.21755e+06	746552	61.3161	1.2091e+06	1.21926e+06	1.83651e+06	1.42162e+06	359340	25.2768
Q6PJ69	Tripartite motif-containing protein 65 OS=Homo sapiens GN=TRIM65 PE=1 SV=3 - [TRI65_HUMAN]	LCGLLLEEGSHPGAPAKPVDLAPVEAPGPLAPVPSTVCPLRR	[2] Carbamidomethyl|[38] DesthioBiotinIAM(new)	-0.133934	-0.166234	-0.160358	916.3	64.6322	4576.46	5	-0.258584	3.07897e+06	3.34531e+06	3.35936e+06	3.56862e+06	3.63178e+06	3.72606e+06	3.45169e+06	236705	6.85767	2.68089e+06	3.22154e+06	3.53458e+06	3.14567e+06	431876	13.7292	2.92989e+06	3.13302e+06	3.16516e+06	3.07603e+06	127570	4.14723	3.02537e+06	3.11151e+06	3.12885e+06	3.08858e+06	55418.6	1.79431
Q9NYF8	Bcl-2-associated transcription factor 1 OS=Homo sapiens GN=BCLAF1 PE=1 SV=2 - [BCLF1_HUMAN]	LRCDSADLR	[3] DesthioBiotinIAM(new)	-0.0381011	-0.0451999	-0.160033	448.908	42.8432	1343.7	3	2.5954	41013.7	46738.3	50183.5	53015.4	56740.7	59043.3	51122.5	6635.92	12.9804	44897.3	49676.7	54796	49790	4950.33	9.94241	44870.5	51680.5	52085.9	49545.6	4053.85	8.18205	41269.1	44719.1	51276.3	45754.8	5083.36	11.11
Q9NYL2	Mitogen-activated protein kinase kinase kinase MLT OS=Homo sapiens GN=MLTK PE=1 SV=3 - [MLTK_HUMAN]	LTIPSSCPR	[7] DesthioBiotinIAM(new)	-0.119741	-0.129964	-0.159865	635.353	51.7672	1268.69	2	-0.303452	606245	614753	621304	634923	637695	639933	625809	13777.7	2.20158	497541	568036	662318	575965	82674.3	14.3541	503778	593427	618488	571898	60309.5	10.5455	489869	539459	651173	560167	82622.2	14.7496
P20290	Transcription factor BTF3 OS=Homo sapiens GN=BTF3 PE=1 SV=1 - [BTF3_HUMAN]	ARGGCPGGEATLSQPPPR	[5] DesthioBiotinIAM(new)	-0.162768	0.21611	-0.159577	683.024	43.0827	2046.05	3	3.21791	638736	657310	670646	671410	716335	771619	687676	48455.2	7.04622	407194	702768	732961	614308	180000	29.3013	716200	725289	954919	798803	135278	16.935	608592	617006	621406	615668	6510.89	1.05753
P23526	Adenosylhomocysteinase OS=Homo sapiens GN=AHCY PE=1 SV=4 - [SAHH_HUMAN]	QAQYLGMSCDGPFKPDHYRY	[7] Oxidation|[9] DesthioBiotinIAM(new)	-0.182274	-0.352518	-0.159504	672.817	52.5081	2687.24	4	4.2932	1.28425e+06	1.30222e+06	1.35306e+06	2.05269e+06	2.05512e+06	2.06466e+06	1.68533e+06	408322	24.228	1.3437e+06	1.38474e+06	1.72748e+06	1.48531e+06	210732	14.1878	934066	1.02671e+06	1.99917e+06	1.31998e+06	590016	44.6988	1.32033e+06	1.45822e+06	1.74826e+06	1.50894e+06	218427	14.4756
O14979	Heterogeneous nuclear ribonucleoprotein D-like OS=Homo sapiens GN=HNRNPDL PE=1 SV=3 - [HNRDL_HUMAN]	FGEVVDCTIK	[7] DesthioBiotinIAM(new)	-0.328443	-0.372812	-0.158753	703.874	57.0543	1405.73	2	3.85234	892373	932779	950368	991550	1.00489e+06	1.13639e+06	984724	84690.3	8.6004	737385	743779	871527	784230	75668.7	9.64879	737678	765495	778262	760478	20752.2	2.72884	751832	831784	1.06273e+06	882115	161443	18.3018
Q7Z5J4	Retinoic acid-induced protein 1 OS=Homo sapiens GN=RAI1 PE=1 SV=2 - [RAI1_HUMAN]	VRPEGTCEEASLPLER	[7] DesthioBiotinIAM(new)	-0.156255	-0.225877	-0.158753	694.697	50.8521	2081.07	3	5.2259	136179	136187	142572	150235	150598	151250	144503	7179.4	4.96832	113683	123532	151796	129670	19784.2	15.2573	114371	121202	135111	123561	10569.6	8.55416	125022	131482	131834	129446	3835.3	2.96286
P36871	Phosphoglucomutase-1 OS=Homo sapiens GN=PGM1 PE=1 SV=3 - [PGM1_HUMAN]	TIEEYAVCPDLK	[8] DesthioBiotinIAM(new)	-0.122173	-0.363555	-0.158059	838.935	58.4641	1675.85	2	3.30794	487206	540116	594270	599967	657926	686244	594288	73401.7	12.3512	503009	564718	570374	546034	37367.5	6.84343	346086	437474	602166	461909	129777	28.0958	518875	526218	552764	532619	17828.6	3.34735
P35579	Myosin-9 OS=Homo sapiens GN=MYH9 PE=1 SV=4 - [MYH9_HUMAN]	ADFCIIHYAGK	[4] DesthioBiotinIAM(new)	-0.495296	-0.423207	-0.157956	511.937	57.3597	1532.79	3	5.10179	330746	333385	353464	360367	373587	392322	357312	23634.6	6.61456	226655	262933	270860	253483	23568.9	9.29804	250519	259122	289771	266471	20632.1	7.74273	298070	301848	360851	320256	35206.7	10.9933
Q53ET0	CREB-regulated transcription coactivator 2 OS=Homo sapiens GN=CRTC2 PE=1 SV=2 - [CRTC2_HUMAN]	SLQQPGLPSQSCSVQSSGGQPPGR	[12] DesthioBiotinIAM(new)	-0.149297	0.00940446	-0.157838	893.452	51.4142	2677.33	3	3.97983	682678	690864	760009	779607	836213	866591	769327	74553.4	9.69073	591469	733600	756013	693694	89236.1	12.8639	638301	698702	986072	774358	185820	23.9966	633952	691607	743239	689599	54670.8	7.92791
Q9UNH7	Sorting nexin-6 OS=Homo sapiens GN=SNX6 PE=1 SV=1 - [SNX6_HUMAN]	IGSSLYALGTQDSTDICK	[17] DesthioBiotinIAM(new)	-0.51276	-0.19585	-0.15759	723.364	61.128	2167.07	3	-5.65954	581630	665985	786049	1.2804e+06	1.44253e+06	1.56915e+06	1.05429e+06	427336	40.533	555928	558487	1.10238e+06	738931	314757	42.5963	615770	633040	1.51256e+06	920457	512850	55.7169	619716	739761	1.47611e+06	945194	463684	49.057
P04075	Fructose-bisphosphate aldolase A OS=Homo sapiens GN=ALDOA PE=1 SV=2 - [ALDOA_HUMAN]	VNPCIGGVILFHETLYQK	[4] DesthioBiotinIAM(new)	-0.134123	-0.349353	-0.157119	776.428	65.376	2326.26	3	5.01788	4.22751e+06	4.30183e+06	4.92826e+06	4.96466e+06	5.08861e+06	5.44564e+06	4.82609e+06	472344	9.78732	4.22745e+06	4.43979e+06	4.5257e+06	4.39764e+06	153527	3.49112	3.74726e+06	3.80485e+06	3.8124e+06	3.78817e+06	35630.6	0.940576	4.28673e+06	4.29579e+06	4.40179e+06	4.3281e+06	63977.1	1.47818
P33316	Deoxyuridine 5'-triphosphate nucleotidohydrolase, mitochondrial OS=Homo sapiens GN=DUT PE=1 SV=4 - [DUT_HUMAN]	IAQLICER	[6] DesthioBiotinIAM(new)	0.145199	-0.16154	-0.156811	621.356	52.8403	1240.7	2	1.30337	178330	184264	185713	188411	219292	226606	197103	20422.1	10.3612	184397	225097	244424	217972	30641.2	14.0574	145655	188027	194989	176224	26701.2	15.1519	172695	177543	180169	176802	3791.85	2.14469
P61106	Ras-related protein Rab-14 OS=Homo sapiens GN=RAB14 PE=1 SV=4 - [RAB14_HUMAN]	FMADCPHTIGVEFGTR	[2] Oxidation|[5] DesthioBiotinIAM(new)	-0.175697	-0.202392	-0.156727	698.34	55.9296	2092	3	5.92933	889088	915751	961970	1.21831e+06	1.31231e+06	1.41392e+06	1.11856e+06	224960	20.1116	932092	1.01335e+06	1.02547e+06	990304	50776.1	5.12732	786843	904384	1.22522e+06	972148	226907	23.3408	815157	831699	1.36338e+06	1.00341e+06	311849	31.0789
Q6NXT1	Ankyrin repeat domain-containing protein 54 OS=Homo sapiens GN=ANKRD54 PE=1 SV=2 - [ANR54_HUMAN]	TALHFASCNGNDQIVQLLLDHGADPNQR	[8] DesthioBiotinIAM(new)	-0.232375	0.0650997	-0.156674	836.675	66.2069	3342.67	4	5.00081	1.08082e+06	1.11372e+06	1.14712e+06	1.1517e+06	1.23218e+06	1.33574e+06	1.17688e+06	92770.7	7.88276	796984	905948	1.30247e+06	1.0018e+06	266025	26.5547	1.14347e+06	1.24693e+06	1.30321e+06	1.2312e+06	81025	6.58096	1.03838e+06	1.0504e+06	1.07853e+06	1.05577e+06	20605.7	1.95172
Q6NYC8	Phostensin OS=Homo sapiens GN=PPP1R18 PE=1 SV=1 - [PPR18_HUMAN]	ALIVDESCRR	[8] DesthioBiotinIAM(new)	-0.166289	-0.108326	-0.156666	486.604	46.4988	1456.79	3	5.49964	470393	494781	495326	496946	499615	502490	493259	11564.4	2.34449	312868	492580	513228	439559	110202	25.071	419404	462310	491020	457578	36041.5	7.87657	391807	456586	479108	442500	45322.9	10.2425
Q9HAS0	Protein Njmu-R1 OS=Homo sapiens GN=C17orf75 PE=1 SV=2 - [NJMU_HUMAN]	SVVIDCSSSQPQFCNAGSNR	[6] Carbamidomethyl|[14] DesthioBiotinIAM(new)	-0.0381777	-0.251528	-0.156628	818.053	53.8615	2451.14	3	4.34628	225633	226894	230437	249433	259825	270550	243795	18965.8	7.77939	219545	239309	253431	237428	17021.1	7.16895	186025	204175	224169	204789	19079.2	9.31649	211173	215610	229357	218713	9481.04	4.33491
O75179	Ankyrin repeat domain-containing protein 17 OS=Homo sapiens GN=ANKRD17 PE=1 SV=3 - [ANR17_HUMAN]	LSETISEGTSNSLSTCTK	[16] DesthioBiotinIAM(new)	-0.249928	-0.330437	-0.15654	718.693	51.3908	2153.06	3	2.40393	209499	211065	219559	225622	236620	236783	223192	11989.1	5.37165	157585	191071	214415	187690	28565.5	15.2195	144819	167514	220177	177503	38659.3	21.7795	192618	193681	214426	200242	12295.3	6.14025
Q6NZY4	Zinc finger CCHC domain-containing protein 8 OS=Homo sapiens GN=ZCCHC8 PE=1 SV=2 - [ZCHC8_HUMAN]	KSEAGHASSPDSEVTSLCQK	[18] DesthioBiotinIAM(new)	-0.0776927	-0.0494725	-0.15638	590.044	43.3413	2356.15	4	5.29728	417075	430107	435187	435588	450086	466599	439107	17149.4	3.90553	405912	412944	429400	416085	12055.3	2.89731	365740	413122	494052	424304	64882.8	15.2916	363912	397452	420633	393999	28517.6	7.23799
P49790	Nuclear pore complex protein Nup153 OS=Homo sapiens GN=NUP153 PE=1 SV=2 - [NU153_HUMAN]	CVACETPKPGTCVK	[1] Carbamidomethyl|[4] Carbamidomethyl|[12] DesthioBiotinIAM(new)	-0.343132	-0.272852	-0.156356	615.975	41.5776	1844.9	3	5.10766	2.00717e+06	2.2986e+06	2.34166e+06	2.43334e+06	2.64081e+06	2.70633e+06	2.40465e+06	253304	10.5339	1.54417e+06	1.77436e+06	2.36844e+06	1.89565e+06	425312	22.4362	1.59895e+06	2.18044e+06	2.19146e+06	1.99029e+06	338949	17.0302	1.80585e+06	2.33126e+06	2.33589e+06	2.15767e+06	304689	14.1212
Q99961	Endophilin-A2 OS=Homo sapiens GN=SH3GL1 PE=1 SV=1 - [SH3G1_HUMAN]	EPFDLGEPEQSNGGFPCTTAPK	[17] DesthioBiotinIAM(new)	-0.0609954	-0.022628	-0.15589	873.085	63.392	2616.23	3	6.21496	2.02011e+06	2.29309e+06	2.29896e+06	2.3221e+06	2.40551e+06	2.45733e+06	2.29952e+06	151501	6.58837	2.08241e+06	2.10155e+06	2.42901e+06	2.20432e+06	194819	8.83804	1.94313e+06	1.97069e+06	2.87738e+06	2.26373e+06	531611	23.4838	1.83926e+06	2.13233e+06	2.2204e+06	2.064e+06	199542	9.66775
P50914	60S ribosomal protein L14 OS=Homo sapiens GN=RPL14 PE=1 SV=4 - [RL14_HUMAN]	ALVDGPCTQVR	[7] DesthioBiotinIAM(new)	-0.137643	-0.407474	-0.155846	727.897	51.3328	1453.78	2	5.03229	1.23429e+06	1.27865e+06	1.28379e+06	1.29105e+06	1.32189e+06	1.38101e+06	1.29845e+06	49282	3.79546	1.0884e+06	1.20598e+06	1.24649e+06	1.18029e+06	82113.8	6.95708	920586	997389	1.01889e+06	978954	51677.5	5.27885	995281	1.17591e+06	1.32529e+06	1.16549e+06	165252	14.1787
P78527	DNA-dependent protein kinase catalytic subunit OS=Homo sapiens GN=PRKDC PE=1 SV=3 - [PRKDC_HUMAN]	CGAALAGHQLIR	[1] DesthioBiotinIAM(new)	-0.0419539	0.144156	-0.155768	502.62	48.07	1504.84	3	4.7986	254736	277776	296157	302325	312126	320642	293960	24154.4	8.21688	250820	276947	328838	285535	39711.5	13.9078	284007	344009	346536	324851	35394.1	10.8955	252470	268796	270358	263875	9907.22	3.75452
P21980	Protein-glutamine gamma-glutamyltransferase 2 OS=Homo sapiens GN=TGM2 PE=1 SV=2 - [TGM2_HUMAN]	YGQCWVFAAVACTVLR	[4] DesthioBiotinIAM(new)|[12] Carbamidomethyl	-0.257148	-0.171545	-0.155516	714.036	78.2644	2139.09	3	4.84257	512588	765359	778473	836770	913216	934342	790125	152251	19.2692	279826	518523	1.18504e+06	661129	469153	70.9624	368920	631306	1.10441e+06	701545	372741	53.1315	351766	785503	990880	709383	326286	45.9957
Q9NP61	ADP-ribosylation factor GTPase-activating protein 3 OS=Homo sapiens GN=ARFGAP3 PE=1 SV=1 - [ARFG3_HUMAN]	LGMGFGNCR	[3] Oxidation|[8] DesthioBiotinIAM(new)	-0.579355	-0.512833	-0.155189	633.81	48.6557	1265.6	2	3.0852	262888	267067	295418	405244	418772	462110	351917	86918.1	24.6985	231729	236530	238315	235525	3406.36	1.44629	145549	171749	422618	246639	152964	62.0196	233731	235743	478605	316026	140800	44.5534
Q96EV2	RNA-binding protein 33 OS=Homo sapiens GN=RBM33 PE=1 SV=3 - [RBM33_HUMAN]	CSATPSAQVKPIVSASPPSR	[1] DesthioBiotinIAM(new)	-0.135065	-0.10154	-0.155016	760.414	48.4815	2278.22	3	3.68232	492358	553431	566633	568836	607987	633294	570423	48504.7	8.50328	449745	530330	578257	519444	64944.2	12.5026	453978	559928	581061	531656	68095.4	12.8082	479219	512847	544864	512310	32825.5	6.40735
O75083	WD repeat-containing protein 1 OS=Homo sapiens GN=WDR1 PE=1 SV=4 - [WDR1_HUMAN]	MTVDESGQLISCSMDDTVR	[1] Oxidation|[12] DesthioBiotinIAM(new)|[14] Oxidation	-0.500688	-0.516486	-0.154895	805.701	55.3621	2414.08	3	2.21382	209731	251790	254248	348123	401113	435634	316773	91448.6	28.8688	195593	198183	277881	223886	46779.7	20.8944	151872	163867	348603	221447	110283	49.8012	209986	211275	432313	284525	127990	44.9838
Q96K21	Zinc finger FYVE domain-containing protein 19 OS=Homo sapiens GN=ZFYVE19 PE=1 SV=3 - [ZFY19_HUMAN]	AFCSGCLSFSAAVPR	[3] DesthioBiotinIAM(new)|[6] Carbamidomethyl	-0.0262953	-0.193101	-0.153645	934.966	62.6838	1867.92	2	5.79715	3.04216e+06	3.05001e+06	3.09294e+06	3.11699e+06	3.17285e+06	3.24114e+06	3.11935e+06	76374.7	2.44842	2.84771e+06	3.15398e+06	3.18733e+06	3.06301e+06	187198	6.11158	2.33107e+06	2.40145e+06	3.45318e+06	2.72857e+06	628518	23.0347	2.64704e+06	2.78584e+06	2.97978e+06	2.80422e+06	167133	5.96005
Q15631	Translin OS=Homo sapiens GN=TSN PE=1 SV=1 - [TSN_HUMAN]	GFNKETAAACVEK	[10] DesthioBiotinIAM(new)	-0.0524635	0.24657	-0.153631	555.289	43.0894	1662.85	3	3.27294	484102	488382	540934	547841	549637	587217	533019	39702.1	7.44853	473054	480787	588110	513984	64311.4	12.5123	581149	650395	665549	632364	44996.1	7.11553	432775	495017	509735	479176	40852.3	8.52554
P00491	Purine nucleoside phosphorylase OS=Homo sapiens GN=PNP PE=1 SV=2 - [PNPH_HUMAN]	HRPQVAIICGSGLGGLTDKLTQAQIFDYGEIPNFPR	[9] DesthioBiotinIAM(new)	-0.0580603	-0.24677	-0.153409	842.452	69.149	4207.22	5	5.52114	7.06925e+06	7.29829e+06	7.91582e+06	8.14215e+06	8.27376e+06	8.89414e+06	7.93224e+06	668262	8.42464	6.43127e+06	7.82416e+06	8.60261e+06	7.61935e+06	1.10006e+06	14.4378	5.26208e+06	7.10757e+06	7.68577e+06	6.68514e+06	1.26586e+06	18.9355	6.87724e+06	7.09751e+06	7.42142e+06	7.13206e+06	273729	3.83801
Q9BV36	Melanophilin OS=Homo sapiens GN=MLPH PE=1 SV=1 - [MELPH_HUMAN]	AAPHKAEGLEEADTGASGCHSHPEEQPTSISPSR	[19] DesthioBiotinIAM(new)	-0.384964	-0.00117451	-0.153406	756.761	40.5495	3778.77	5	2.77485	558460	610454	682680	687562	709307	717213	660946	62830.4	9.50613	325324	550429	642701	506151	163256	32.2543	587315	696571	697339	660408	63302	9.58528	570550	577932	634338	594273	34893.2	5.87157
Q9C0B1	Alpha-ketoglutarate-dependent dioxygenase FTO OS=Homo sapiens GN=FTO PE=1 SV=3 - [FTO_HUMAN]	ANEDAVPLCMSADFPR	[9] DesthioBiotinIAM(new)|[10] Oxidation	-0.396272	-0.594135	-0.153249	683.327	59.1701	2046.96	3	4.33269	255579	288103	292178	386448	396114	401996	336736	65104.2	19.3339	197041	219675	350860	255859	83048.6	32.4588	137455	146606	385143	223068	140436	62.9564	245846	261063	401494	302801	85808.5	28.3382
P21333	Filamin-A OS=Homo sapiens GN=FLNA PE=1 SV=4 - [FLNA_HUMAN]	CSGPGLER	[1] DesthioBiotinIAM(new)	-0.2666	0.0611235	-0.1532	557.789	44.52	1113.56	2	3.34306	149924	158246	158403	159383	164055	165073	159181	5397.84	3.39101	121184	133556	142229	132323	10576.2	7.99274	143214	165975	189021	166070	22903.6	13.7915	136712	141591	151129	143144	7332.69	5.1226
Q6WKZ4	Rab11 family-interacting protein 1 OS=Homo sapiens GN=RAB11FIP1 PE=1 SV=3 - [RFIP1_HUMAN]	VANCSLGTATIISENLNNEVMMK	[4] DesthioBiotinIAM(new)|[21] Oxidation|[22] Oxidation	-0.447757	-0.295598	-0.153192	927.464	63.8656	2779.37	3	5.18042	2.33877e+06	2.57882e+06	2.92346e+06	3.65075e+06	3.7382e+06	4.13788e+06	3.22798e+06	717192	22.218	2.05595e+06	2.23572e+06	2.80843e+06	2.3667e+06	392968	16.6041	1.63136e+06	1.92771e+06	4.33076e+06	2.62995e+06	1.48038e+06	56.2894	2.38853e+06	2.75575e+06	3.56408e+06	2.90279e+06	601413	20.7185
O00233	26S proteasome non-ATPase regulatory subunit 9 OS=Homo sapiens GN=PSMD9 PE=1 SV=3 - [PSMD9_HUMAN]	GIGMNEPLVDCEGYPR	[4] Oxidation|[11] DesthioBiotinIAM(new)	-0.0288332	-0.386719	-0.152916	688	57.2479	2060.98	3	5.64753	1.07443e+06	1.21443e+06	1.25656e+06	1.2669e+06	1.31785e+06	1.37064e+06	1.25014e+06	101565	8.12431	883635	1.33131e+06	1.46125e+06	1.2254e+06	303025	24.7286	710360	778518	1.37969e+06	956188	368340	38.5217	1.04107e+06	1.16043e+06	1.17173e+06	1.12441e+06	72398.5	6.43879
Q9NZL4	Hsp70-binding protein 1 OS=Homo sapiens GN=HSPBP1 PE=1 SV=1 - [HPBP1_HUMAN]	LLDRDACDTVR	[7] DesthioBiotinIAM(new)	-0.209021	-0.144418	-0.152832	524.945	45.8766	1571.81	3	3.3332	1.33627e+06	1.3844e+06	1.48481e+06	1.4968e+06	1.50353e+06	1.50669e+06	1.45208e+06	73065	5.03174	1.21598e+06	1.25028e+06	1.30244e+06	1.25623e+06	43539.8	3.46591	1.2114e+06	1.3429e+06	1.38699e+06	1.31376e+06	91347.9	6.95314	1.25953e+06	1.30888e+06	1.34996e+06	1.30612e+06	45278	3.46659
P27361	Mitogen-activated protein kinase 3 OS=Homo sapiens GN=MAPK3 PE=1 SV=4 - [MK03_HUMAN]	ISPFEHQTYCQR	[10] DesthioBiotinIAM(new)	-0.222634	-0.138107	-0.15275	602.3	48.1228	1803.88	3	3.75689	197544	214786	221496	223153	223551	231038	218595	11543.3	5.2807	180846	185960	195200	187335	7275.46	3.88366	177640	207519	210758	198639	18257.6	9.19132	180960	199391	209549	196633	14492.4	7.37027
Q9NZB2	Constitutive coactivator of PPAR-gamma-like protein 1 OS=Homo sapiens GN=FAM120A PE=1 SV=2 - [F120A_HUMAN]	HCPSAVVPVELQK	[2] DesthioBiotinIAM(new)	-0.299305	-0.114293	-0.152634	568.318	51.3418	1701.93	3	4.19905	104753	107292	108450	110374	113764	116026	110110	4190.85	3.80606	80790.2	91371.4	96278.5	89480	7915.49	8.8461	90728.4	98247.3	116194	101723	13083.8	12.8621	91362.3	102458	103347	99055.5	6677.33	6.741
P68363	Tubulin alpha-1B chain OS=Homo sapiens GN=TUBA1B PE=1 SV=1 - [TBA1B_HUMAN]	AYHEQLSVAEITNACFEPANQMVK	[15] DesthioBiotinIAM(new)|[22] Oxidation	-0.234301	-0.359643	-0.152443	1002.49	60.1272	3004.46	3	4.62053	2.60668e+07	2.81204e+07	3.02877e+07	3.97137e+07	4.0827e+07	4.30832e+07	3.46831e+07	7.3518e+06	21.1971	2.2035e+07	2.9172e+07	3.7245e+07	2.9484e+07	7.6098e+06	25.8099	1.75181e+07	1.94254e+07	4.41482e+07	2.70306e+07	1.48549e+07	54.956	2.29046e+07	2.72933e+07	4.3418e+07	3.12053e+07	1.08017e+07	34.6151
O96008	Mitochondrial import receptor subunit TOM40 homolog OS=Homo sapiens GN=TOMM40 PE=1 SV=1 - [TOM40_HUMAN]	TPGAATASASGAAEDGACGCLPNPGTFEECHR	[18] DesthioBiotinIAM(new)|[20] Carbamidomethyl|[30] Carbamidomethyl	-0.253881	-0.254229	-0.152434	1153.51	55.321	3457.52	3	2.83979	1.72824e+06	1.85177e+06	1.85561e+06	1.89853e+06	2.02309e+06	2.10622e+06	1.91058e+06	134765	7.05365	1.08327e+06	1.75637e+06	1.96721e+06	1.60228e+06	461675	28.8137	1.51883e+06	1.58769e+06	1.69916e+06	1.60189e+06	90999.2	5.68073	1.52855e+06	1.54191e+06	2.08655e+06	1.719e+06	318377	18.521
Q9P206	Uncharacterized protein KIAA1522 OS=Homo sapiens GN=KIAA1522 PE=1 SV=2 - [K1522_HUMAN]	LPQKEPVGCSK	[9] DesthioBiotinIAM(new)	-0.161684	-0.217476	-0.152052	494.611	38.8109	1480.81	3	3.44754	530221	584728	618038	669236	734642	756648	648919	87784	13.5277	497845	511910	730608	580121	130515	22.4979	33460.9	692296	948588	558115	472089	84.5863	313050	717490	721480	584007	234664	40.1817
Q9HC35	Echinoderm microtubule-associated protein-like 4 OS=Homo sapiens GN=EML4 PE=1 SV=3 - [EMAL4_HUMAN]	VHLFQYPCSK	[8] DesthioBiotinIAM(new)	0.0682981	0.0666056	-0.15196	506.605	52.697	1516.79	3	4.90601	298333	302068	304163	322289	325208	338720	315130	16014.7	5.08193	318489	333369	339364	330407	10747.8	3.2529	257892	365278	366889	330020	62469.5	18.929	282651	284101	284125	283626	844.325	0.29769
O43175	D-3-phosphoglycerate dehydrogenase OS=Homo sapiens GN=PHGDH PE=1 SV=4 - [SERA_HUMAN]	NAGNCLSPAVIVGLLK	[5] DesthioBiotinIAM(new)	0.0451225	0.0199045	-0.151606	933.041	73.7831	1864.07	2	3.40436	1.77321e+07	1.79342e+07	1.90004e+07	1.93475e+07	1.98166e+07	2.09013e+07	1.9122e+07	1.18801e+06	6.21276	1.69742e+07	2.0935e+07	2.12794e+07	1.97295e+07	2.39239e+06	12.1259	1.77829e+07	1.97446e+07	2.06355e+07	1.93877e+07	1.45941e+06	7.52749	1.67513e+07	1.71646e+07	1.77278e+07	1.72146e+07	490180	2.84748
P07199	Major centromere autoantigen B OS=Homo sapiens GN=CENPB PE=1 SV=2 - [CENPB_HUMAN]	HGVVSCSGVAR	[6] DesthioBiotinIAM(new)	0.541403	0.0806023	-0.151505	456.58	40.2532	1366.72	3	3.28253	22730	40596.1	46776.9	90169.1	102553	114018	69473.9	37525.5	54.0137	72487.2	108052	122795	101111	25862.1	25.5778	15474.8	94543.6	110379	73465.8	50842	69.205	15890.9	80906.4	90847	62548.1	40710.9	65.0873
Q6WCQ1	Myosin phosphatase Rho-interacting protein OS=Homo sapiens GN=MPRIP PE=1 SV=3 - [MPRIP_HUMAN]	SSCSFETCPRPTEKQEAELGEPDPEQKR	[3] Carbamidomethyl|[8] DesthioBiotinIAM(new)	-0.164531	-0.0513207	-0.151344	707.138	45.6928	3530.65	5	3.60611	1.34922e+06	1.35783e+06	1.40231e+06	1.45844e+06	1.48386e+06	1.54827e+06	1.43332e+06	77632.4	5.41626	1.1342e+06	1.3341e+06	1.36822e+06	1.27884e+06	126420	9.88556	1.32179e+06	1.35906e+06	1.46884e+06	1.38323e+06	76445.2	5.52657	1.11853e+06	1.35449e+06	1.39872e+06	1.29058e+06	150630	11.6715
Q8NDA8	Maestro heat-like repeat-containing protein family member 1 OS=Homo sapiens GN=MROH1 PE=2 SV=3 - [MROH1_HUMAN]	TLACTHSSAYENQR	[4] DesthioBiotinIAM(new)	0.0291933	0.445539	-0.151333	626.302	39.9917	1875.88	3	-2.82322	342106	342536	355159	356104	373195	413372	363745	26841.3	7.37915	317214	365366	430962	371181	57096.6	15.3824	410867	533857	541346	495357	73266.2	14.7906	182485	391905	408179	327523	125870	38.4309
Q15042	Rab3 GTPase-activating protein catalytic subunit OS=Homo sapiens GN=RAB3GAP1 PE=1 SV=3 - [RB3GP_HUMAN]	FGTEKCEQEEEKEDLER	[6] DesthioBiotinIAM(new)	-0.233047	-0.0459029	-0.151305	599.534	42.2045	2394.11	4	1.75029	185164	186642	190897	194952	202984	218102	196457	12394.4	6.30899	151030	169888	180539	167153	14943.4	8.93997	184814	190097	196003	190305	5597.25	2.94121	158690	182918	189083	176897	16066.5	9.08239
P22087	rRNA 2'-O-methyltransferase fibrillarin OS=Homo sapiens GN=FBL PE=1 SV=2 - [FBRL_HUMAN]	NVMVEPHRHEGVFICR	[3] Oxidation|[15] DesthioBiotinIAM(new)	-0.535869	-0.155457	-0.151299	559.54	43.9179	2234.13	4	4.17529	504203	628816	633098	655865	657124	747822	637821	78429	12.2964	410772	419686	489340	439933	43019.5	9.77866	447096	605775	665130	572667	112724	19.6841	526490	545862	650605	574319	66771.9	11.6263
[truncated: 1,840 more rows]

## Sheet: Table
	KRAS G12C ('LVVVGACGVGK')				FAM213A ('RPGCFLCR')				RTN4 ('YSNSALGHVNCTIK')
Samples	Normalized peak areas	% Cell Engagement	Average	Standard deviation	Normalized peak areas	% Cell Engagement	Average	Standard deviation	Normalized peak areas	% Cell Engagement	Average	Standard deviation
DMSO_rep1	246149	-5.07924	-9.4739e-15	4.65427	902358	4.21458	-2.36848e-15	2.92261	992569	24.0714	-4.73695e-15	20.6108
[truncated: 19 more rows]

## Sheet: Charts
Number	Fold change (DMSO/3uM853), log2	Fold change (DMSO/10uM853), log2	Fold change (DMSO/30uM853), log2
[truncated: 2,740 more rows]

[truncated: 1 more sheets: Annotations]
